# Supplementary material for: Elucidation of Triacylglycerol Overproduction in the C4 Bioenergy Crop Sorghum bicolor by Constraint-Based Analysis
Source: Front Plant Sci. 2022 Feb 17;13:787265. doi: 10.3389/fpls.2022.787265 (PMC8892208; doi:10.3389/fpls.2022.787265)
Supplement: Supplementary file 6 [file Table_1.XLSX]

## Sheet: Table S1
Supplementary Table 1. Summary of reactions in iTJC1414x4. Reactions are listed by their compartment and general function. Counts refer to the number of reactions per sub-model (e.g., bundle sheath cell-day model).
	Type of Reaction		Count
	Cytosol		440
		TAG synthesis	56
		Phospholipid synthesis	23
		Fatty acid editing	38
		TAG degradation	21
		Catabolism	59
		Amino acid synthesis	33
		Carbohydrate synthesis	38
		Nucleic acid synthesis	38
		Lignin synthesis	20
		Other	114
	Peroxisome		140
		Beta-oxidation	130
		Other	10
	Mitochondria		21
	Plastid		193
		Amino acid synthesis	49
		Fatty acid synthesis	43
		Photosynthesis	21
		Other	80
	Biomass sink		103
		Fixed biomass sink	14
		Variable lipid sink	49
		Other variable sink	40
	Transport		133
		Intracellular	81
		Intercellular	25
		Environmental	28

## Sheet: Table S2
Supplementary Table 2. Model constraints based on leaf physiology. Listed are iTJC1414x4 reactions that were constrained to be consistent with literature estimates of Sorghum bicolor physiology or NADP-ME C4 photosynthesis. Details on how these constraints were derived is given in the Description column and in the Methods section of the main text.
Component	Day model, constraints (mol/m2/day)	Night model, constraints (mol/m2/day)	Description
BS-cell:M-cell ratio in light absorption	mcDaytxLight*0.39843 - bscDaytxLight = 0	bscNighttxLight = 0 mcNighttxLight = 0	Applied aBS,M = 0.3984358392 to equation 7 (main text)
fraction of BS cell-absorbed irradiance that is used for linear electron transport	0.8951096*mcDayPhotosystemImodchloroplast-4.873939*mcDayPhotosystemIImodchloroplast = 0		Applied fLETM = 0.8951096 to equation 7 (main text)
	0.0318235*bscDayPhotosystemImodchloroplast-9.090883*bscDayPhotosystemIImodchloroplast = 0		Applied fLETBS = 0.0318235 to equation 7 (main text)
CO2 uptake	mcDaytxCARBONDIOXIDE ≤ 1.344		CO2 is taken up by the mesophyll cell
Cellular	bscDayGenericATPasemod ≥ 0.3692	bscNightGenericATPasemod ≥ 0.2637	ATP and NADPH drains approximate cellular maintenance
Maintenance	mcDayGenericATPasemod ≥ 0.3692	mcNightGenericATPasemod ≥ 0.2637
	bscDayGenericNADPOxidasemod ≥ 0.1231	bscNightGenericNADPOxidasemod ≥ 0.0879
	mcDayGenericNADPOxidasemod ≥ 0.1231	mcNightGenericNADPOxidasemod ≥ 0.0879
Starch	bscDayStarchSynthesis ≥ 0		Starch accumulated during the day is shared with the night BS sub-model
Rubisco	mcDayRIBULOSEBISPHOSPHATECARBOXYLASERXNchloroplast = 0		Rubisco carboxylase and oxygenase activities are not active in mesophyll cells
	mcNightRIBULOSEBISPHOSPHATECARBOXYLASERXNchloroplast = 0
	mcDayRXN961chloroplast = 0	mcNightRXN961chloroplast = 0
Malate	bscDayMALATEDEHRXN = 0	bscNightMALATEDEHRXN = 0	Malate oxidoreductase is constrained to be NADP-dependent and plastidic (i.e., not active in the cytosol or mitochondrion, and for malate to only be exported from the peroxisome)
Oxidoreductase	mcDayMALATEDEHRXN = 0	mcNightMALATEDEHRXN = 0
	bscDayMALATEDEHRXNmitochondrion = 0	bscNightMALATEDEHRXNmitochondrion = 0
	mcDayMALATEDEHRXNmitochondrion = 0	mcNightMALATEDEHRXNmitochondrion = 0
	bscDayMALICNADPRXN = 0	bscNightMALICNADPRXN = 0
	mcDayMALICNADPRXN = 0	mcNightMALICNADPRXN = 0	Reactions:
	bscDayEC11139 = 0	bscNightEC11139 = 0	MALATEDEHRXN:
	mcDayEC11139 = 0	mcNightEC11139 = 0	OAA + H+ + NADH <=> Mal + NAD+
	bscDayEC11139chloroplast = 0	bscNightEC11139chloroplast = 0	MALICNADPRXN:
	mcDayEC11139chloroplast = 0	mcNightEC11139chloroplast = 0	Mal + NADP+ -> PYR + NADPH + CO2
	bscDayPeroxisomeMalateExchange ≤ 0	bscNightPeroxisomeMalateExchange ≤ 0	EC11139:
	mcDayPeroxisomeMalateExchange ≤ 0	mcNightPeroxisomeMalateExchange ≤ 0	MAL + NAD+ -> PYR + NADH + CO2
Autotrophy	bscDaytxSUCROSE ≤ 0	bscNighttxSUCROSE ≤ 0	Cells are autotrophic and only export carbon metabolites
	bscDaytxLYS ≤ 0	bscNighttxLYS ≤ 0
	bscDaytxARG ≤ 0	bscNighttxARG ≤ 0
	bscDaytxTYR ≤ 0	bscNighttxTYR ≤ 0
	bscDaytxGLU ≤ 0	bscNighttxGLU ≤ 0
	bscDaytxGLY ≤ 0	bscNighttxGLY ≤ 0	Cells are autotrophic and only export carbon metabolites
	bscDaytxILE ≤ 0	bscNighttxILE ≤ 0
	bscDaytxLASPARTATE ≤ 0	bscNighttxLASPARTATE ≤ 0
	bscDaytxTHR ≤ 0	bscNighttxTHR ≤ 0
	bscDaytxHIS ≤ 0	bscNighttxHIS ≤ 0
	bscDaytxGLUTATHIONE ≤ 0	bscNighttxGLUTATHIONE ≤ 0
	bscDaytxPHE ≤ 0	bscNighttxPHE ≤ 0
	bscDaytxLALPHAALANINE ≤ 0	bscNighttxLALPHAALANINE ≤ 0
	bscDaytxASN ≤ 0	bscNighttxASN ≤ 0
	bscDaytxVAL ≤ 0	bscNighttxVAL ≤ 0
	bscDaytxLEU ≤ 0	bscNighttxLEU ≤ 0
	bscDaytxMET ≤ 0	bscNighttxMET ≤ 0
	bscDaytxSER ≤ 0	bscNighttxSER ≤ 0
Plasmodesmata	plasmodesmatamcDayCO2bscDayCO2 ≥ 0		CO2 is not directly transported from mesophyll to bundle sheath cells. NADPH-ME sub type C4-shuttle transports via exchange of malate/pyruvate or aspartate/alanine. Block movement of phosphoenolpyruvate, glutamate and 2-ketoglutarate.
transport	plasmodesmatamcDayLalaninebscDayLalanine ≥ 0
	plasmodesmatamcDayLASPARTATEbscDayLASPARTATE ≤ 0
	plasmodesmatamcDayMALbscDayMAL ≤ 0
	plasmodesmatamcDayPYRUVATEbscDayPYRUVATE ≥ 0
	plasmodesmatamcDayphosphoenolpyruvatebscDayphosphoenolpyruvate = 0
	plasmodesmatamcDayGLUbscDayGLU = 0
	plasmodesmatamcDay2KETOGLUTARATEbscDay2KETOGLUTARATE = 0
	plasmodesmatamcDayG3PbscDayG3P ≥ 0
CO2 leakage	plasmodesmatamcDayCO2bscDayCO2 =		CO2 leakage
	0.13 * bscDayRIBULOSEBISPHOSPHATECARBOXYLASERXNchloroplast
	plasmodesmatamcNightCO2bscNightCO2 =
	0.13 * bscNightRIBULOSEBISPHOSPHATECARBOXYLASERXNchloroplast
Photorespiration	bscDayRIBULOSEBISPHOSPHATECARBOXYLASERXNchloroplast		Photorespiration is constrained as a ratio of rubisco carboxylation and oxygenation (RXN961) fluxes
	= 29.2 * bscDayRXN961chloroplast
	bscNightRIBULOSEBISPHOSPHATECARBOXYLASERXNchloroplast
	= 29.2 * bscNightRXN961chloroplast

## Sheet: Table S3
Supplementary Table 3. Biomass composition constraints based on observed ratios. Developing Sorghum bicolor leaves were modeled with iTJC1414x4 and constrained to have new leaf dry weight (DW) be comprised of lipids, proteins, and carbohydrates in the indicated compositions.
Component	% DW	Molar Composition
Triacylglycerol [1-2]	0.01	16:0 - 13%	18:2 - 20%
		18:1 - 7%	18:3 - 60%
Diacylglycerol [1-2]	0.02	34:3 - 7%	36:5 - 7%	36:6 - 86%
Phosphatidylcholine [1-2]	0.06	34:1 - 2%	34:2 - 16%	34:3 - 40%
		36:3 - 2%	36:4 - 2%	36:5 - 24%
		36:6 - 14%
Protein [1,3]	0.21	Alanine - 7%	Histidine - 2%	Proline - 8%
		Arginine - 4%	Isoleucine - 4%	Serine - 4%
		Aspartate - 7%	Leucine - 14%	Threonine - 3%
		Cystine - 1%	Lysine - 2%	Tyrosine - 3%
		Glutamate - 26%	Methionine - 2%	Valine - 4%
		Glycine - 2%	Phenylalanine - 6%
Soluble Sugar [1, 4-6]	0.18	Sucrose - 95%	Glucose - 4%	Fructose - 1%
Cellulose [1, 4-5]	0.21	Glucose - 100%
Hemicellulose [1, 4-5, 7]	0.27	Glucose - 32%	Galacturonate - 1%	Glucuronate - 1%
		Galactose - 11%	Mannose - 1%
		Arabinose - 10%	Xylose - 43%
Lignin [1, 4-5, 8]	0.04	Coniferyl alcohol - 29%	Coumaryl alcohol - 19%	Sinapyl alcohol - 52%
References
[1] Wall, J. S., & Blessin, C. W. (1969). Composition~ Structure ofSorghum Grains.
[2] Vanhercke, T., Belide, S., Taylor, M. C., El Tahchy, A., Okada, S., Rolland, V., ... & Ma, L. (2019). Up‐regulation of lipid biosynthesis increases the oil content in leaves of Sorghum bicolor. Plant biotechnology journal, 17(1), 220-232.
[3] Deyoe, C. W., & Shellenberger, J. A. (1965). Nutritive value of grains, amino acids and proteins in sorghum grain. Journal of Agricultural and Food Chemistry, 13(5), 446-450.
[4] Dien, B. S., Sarath, G., Pedersen, J. F., Sattler, S. E., Chen, H., Funnell-Harris, D. L., ... & Cotta, M. A. (2009). Improved sugar conversion and ethanol yield for forage sorghum (Sorghum bicolor L. Moench) lines with reduced lignin contents. BioEnergy Research, 2(3), 153-164.
[5] Zhao, Y. L., Dolat, A., Steinberger, Y., Wang, X., Osman, A., & Xie, G. H. (2009). Biomass yield and changes in chemical composition of sweet sorghum cultivars grown for biofuel. Field Crops Research, 111(1-2), 55-64.
[7] Peng, F., Bian, J., Peng, P., Guan, Y., Xu, F., & Sun, R. C. (2012). Fractional separation and structural features of hemicelluloses from sweet sorghum leaves. BioResources, 7(4), 4744-4759.
[8] She, D., Xu, F., Geng, Z., Sun, R., Jones, G. L., & Baird, M. S. (2010). Physicochemical characterization of extracted lignin from sweet sorghum stem. Industrial Crops and Products, 32(1), 21-28.

## Sheet: Table S4
Supplementary Table 4. Definition of leaf photo-assimilate export consisting of sucrose and amino acids. Based on phloem sap composition of barley leaves (phloem concentration from Table IV in: Winter H, Lohaus G, Heldt HW (1992) Plant Physiology 99(3):996-1004. doi: 10.1104/pp.99.3.996).
Phloem compound	phloem concentration [mM]	molar coefficient	iTJC1414 metabolite	compound name	composition
Sucrose	1030	1	bscDaySucrose[bscDayc]	sucrose	C12H22O11
Alanine	11.3	0.01097	bscDayLAlanine[bscDayc]	L-alanine	C3H7NO2
Asparagine	2.4	0.00233	bscDayAsn[bscDayc]	L-asparagine	C4H8N2O3
Aspartate	26	0.02524	bscDayLAspartate[bscDayc]	L-aspartate	C4H7NO4
Glutamate	89	0.08641	bscDayGlu[bscDayc]	L-glutamate	C5H9NO4
Glutamine	8	0.00777	bscDayGln[bscDayc]	L-glutamine	C5H10N2O3
Glycine	5.8	0.00563	bscDayGly[bscDayc]	glycine	C2H5NO2
Isoleucine	1.1	0.00107	bscDayIle[bscDayc]	L-isoleucine	C6H13NO2
Leucine	1.1	0.00107	bscDayLeu[bscDayc]	L-leucine	C6H13NO2
Lysine	1.7	0.00165	bscDayLys[bscDayc]	L-lysine	C6H14N2O2
Serine	25	0.02427	bscDaySer[bscDayc]	L-serine	C3H7NO3
Threonine	7.3	0.00709	bscDayThr[bscDayc]	L-threonine	C4H9NO3
Tyrosine	0.5	0.00049	bscDayTyr[bscDayc]	L-tyrosine	C9H11NO3
Valine	3.7	0.00359	bscDayVal[bscDayc]	L-valine	C5H11NO2
				product	C12.77162H23.48515N0.18933O11.62041
formation equation "bscDaytxASSIMILATES":
1.00000 bscDaySucrose[bscDayc] + 0.01097 bscDayLAlanine[bscDayc] + 0.00233 bscDayAsn[bscDayc] + 0.02524 bscDayLAspartate[bscDayc] + 0.08641 bscDayGlu[bscDayc] + 0.00777 bscDayGln[bscDayc] + 0.00563 bscDayGly[bscDayc] + 0.00107 bscDayIle[bscDayc] + 0.00107 bscDayLeu[bscDayc] + 0.00165 bscDayLys[bscDayc] + 0.02427 bscDaySer[bscDayc] + 0.00709 bscDayThr[bscDayc] + 0.00049 bscDayTyr[bscDayc] + 0.0035…

## Sheet: Table S5
Supplementary Table 5. Definition of oil droplets being composed of triacylglycerol (Table S3) and oleosin. Oleosin composition was derived from AF091840.1 (15KDa Oleosin, Sesamum indicum). Molar coefficients of oleosins are adjusted relative to the TAG molar coefficients so that oleosin is 5 % of the total weight of the product. Note that the reaction equation for the daily oil accumulation rate…
molar coefficient	iTJC1414 metabolite (for BS cells)	compound name	Composition (H2O substracted for amin acids)	comment
0.0631	bscDayLAlanine[bscDayc]	L-alanine	C3H5NO
0.018	bscDayArg[bscDayc]	L-arginine	C6H12N4O
0.006	bscDayLAspartate[bscDayc]	L-aspartate	C4H5NO3
0.012	bscDayGlu[bscDayc]	L-glutamate	C5H7NO3
0.036	bscDayGln[bscDayc]	L-glutamine	C5H8N2O2
0.0391	bscDayGly[bscDayc]	glycine	C2H3NO
0.009	bscDayHis[bscDayc]	L-histidine	C6H7N3O
0.018	bscDayIle[bscDayc]	L-isoleucine	C6H11NO
0.0571	bscDayLeu[bscDayc]	L-leucine	C6H11NO
0.018	bscDayLys[bscDayc]	L-lysine	C6H12N2O
0.006	bscDayMet[bscDayc]	L-methionine	C5H9NOS
0.015	bscDayPhe[bscDayc]	L-phenylalanine	C9H9NO
0.024	bscDayPro[bscDayc]	L-proline	C5H7NO
0.033	bscDaySer[bscDayc]	L-serine	C3H5NO2
0.033	bscDayThr[bscDayc]	L-threonine	C4H7NO2
0.003	bscDayTrp[bscDayc]	L-tryptophan	C11H10N2O
0.009	bscDayTyr[bscDayc]	L-tyrosine	C9H9NO2
0.036	bscDayVal[bscDayc]	L-valine	C5H9NO
0.4	bscDayTAG16c0[bscDayc]	C16:0-TAG	C17H32.66667O2	sorghum triacylglycerol component
0.2	bscDayTAG18c1[bscDayc]	C18:1-TAG	C19H34.66667O2	sorghum triacylglycerol component
0.6	bscDayTAG18c2[bscDayc]	C18:2-TAG	C19H32.66667O2	sorghum triacylglycerol component
1.8	bscDayTAG18c3[bscDayc]	C18:3-TAG	C19H30.66667O2	sorghum triacylglycerol component
		product	C58.2621H98.1439N0.5643O6.5823S0.006	(MW 911.4651)
formation equation "bscDayOilDroplet":
bscDayOilDroplet: 1.8718 bscDayATP[bscDayc] + 0.0631 bscDayLAlanine[bscDayc] + 0.0180 bscDayArg[bscDayc] + 0.0060 bscDayLAspartate[bscDayc] + 0.0120 bscDayGlu[bscDayc] + 0.0360 bscDayGln[bscDayc] + 0.0391 bscDayGly[bscDayc] + 0.0090 bscDayHis[bscDayc] + 0.0180 bscDayIle[bscDayc] + 0.0571 bscDayLeu[bscDayc] + 0.0180 bscDayLys[bscDayc] + 0.0060 bscDayMet[bscDayc] + 0.0150 bscDayPhe[bscDayc] + 0.024…
(like in the models protein biosynthesis reaction equation, an extra energetic cost for protein synthesis of 4.3 mol ATP is added per mol amino acid incorporated)

## Sheet: Table S6
Supplementary Table 6. Model constraints to define carbon partitioning and futile cycling. Listed are the MATLAB equations used to constrain the percentage of net carbon allocated to oil (i.e., TAG and oleosin synthesis) to be C_ partitioning and the lipid futile cycling ratios to be TAG_cycling and FA_cycling. More information on these constraints is given in the Description column.
Component		Day model, constraints (mol/m2/day)		Description
carbon partitioning ratio (m-code)		model = addCOBRAConstraints(model, {'bscDaytxAssimilates', 'mcDaytxCARBONDIOXIDE', 'msNighttxCARBONDIOXIDE'}, 0, 'c', [-12.77162, (100- C_partitioning)/100, (100-C_partitioning)/100], 'dsense', 'L');		Detailed version of equation 2 (main text)
FA cycling, m-code				Detailed version of equation 4 (main text)
	16-carbon cycling reactions	model = addCOBRAConstraints(model, {'bscDayChloroplastPalmitateExchange', 'bscDayTAGsink'}, 0, 'c', [1,-3*0.13*FA_cycling], 'dsense', 'G');
		model = addCOBRAConstraints(model, {'mcDayChloroplastPalmitateExchange', 'mcDayTAGsink'}, 0, 'c', [1,-3*0.13*FA_cycling], 'dsense', 'G');
	18-carbon cycling reactions	model = addCOBRAConstraints(model, {'bscDayChloroplastStearicAcidExchange', 'bscDayChloroplastOleateExchange', 'bscDayTAGsink'}, 0, 'c', [1,1,-3*0.87*FA_cycling], 'dsense', 'G');
		model = addCOBRAConstraints(model, {'mcDayChloroplastStearicAcidExchange', 'mcDayChloroplastOleateExchange', 'mcDayTAGsink'}, 0, 'c', [1,1,-3*0.87*FA_cycling], 'dsense', 'G');
TAG cycling, m-code				Detailed version of equation 5 (main text)
	C16:0 cycling reactions	model = addCOBRAConstraints(model, {'bscDayDGAT16c0c18c1c18c1', 'bscDayDGAT16c0c18c1c18c2', 'bscDayDGAT16c0c18c1c18c3', 'bscDayDGAT16c0c18c2c18c1', 'bscDayDGAT16c0c18c2c18c2', 'bscDayDGAT16c0c18c2c18c3', 'bscDayDGAT16c0c18c3c18c1', 'bscDayDGAT16c0c18c3c18c2', 'bscDayDGAT16c0c18c3c18c3', 'bscDayDGAT18c1c18c1c16c0', 'bscDayDGAT18c1c18c2c16c0', 'bscDayDGAT18c1c18c3c16c0', 'bscDayDGAT18c2c18c2c16c0',…
		model = addCOBRAConstraints(model, {'mcDayDGAT16c0c18c1c18c1', 'mcDayDGAT16c0c18c1c18c2', 'mcDayDGAT16c0c18c1c18c3', 'mcDayDGAT16c0c18c2c18c1', 'mcDayDGAT16c0c18c2c18c2', 'mcDayDGAT16c0c18c2c18c3', 'mcDayDGAT16c0c18c3c18c1', 'mcDayDGAT16c0c18c3c18c2', 'mcDayDGAT16c0c18c3c18c3', 'mcDayDGAT18c1c18c1c16c0', 'mcDayDGAT18c1c18c2c16c0', 'mcDayDGAT18c1c18c3c16c0', 'mcDayDGAT18c2c18c2c16c0', 'mcDayDGAT18…
	C18:1 cycling reactions	model = addCOBRAConstraints(model, {'bscDayDGAT16c0c16c0c18c1', 'bscDayDGAT16c0c18c1c16c0', 'bscDayDGAT16c0c18c1c18c2', 'bscDayDGAT16c0c18c1c18c3', 'bscDayDGAT16c0c18c2c18c1', 'bscDayDGAT16c0c18c3c18c1', 'bscDayDGAT18c1c18c2c16c0', 'bscDayDGAT18c1c18c2c18c2', 'bscDayDGAT18c1c18c2c18c3', 'bscDayDGAT18c1c18c3c16c0', 'bscDayDGAT18c1c18c3c18c2', 'bscDayDGAT18c1c18c3c18c3', 'bscDayDGAT18c2c18c2c18c1',…
		model = addCOBRAConstraints(model, {'mcDayDGAT16c0c16c0c18c1', 'mcDayDGAT16c0c18c1c16c0', 'mcDayDGAT16c0c18c1c18c2', 'mcDayDGAT16c0c18c1c18c3', 'mcDayDGAT16c0c18c2c18c1', 'mcDayDGAT16c0c18c3c18c1', 'mcDayDGAT18c1c18c2c16c0', 'mcDayDGAT18c1c18c2c18c2', 'mcDayDGAT18c1c18c2c18c3', 'mcDayDGAT18c1c18c3c16c0', 'mcDayDGAT18c1c18c3c18c2', 'mcDayDGAT18c1c18c3c18c3', 'mcDayDGAT18c2c18c2c18c1', 'mcDayDGAT18…
	C18:2 cycling reactions	model = addCOBRAConstraints(model, {'bscDayDGAT16c0c16c0c18c2', 'bscDayDGAT16c0c18c1c18c2', 'bscDayDGAT16c0c18c2c16c0', 'bscDayDGAT16c0c18c2c18c1', 'bscDayDGAT16c0c18c2c18c3', 'bscDayDGAT16c0c18c3c18c2', 'bscDayDGAT18c1c18c1c18c2', 'bscDayDGAT18c1c18c2c16c0', 'bscDayDGAT18c1c18c2c18c1', 'bscDayDGAT18c1c18c2c18c3', 'bscDayDGAT18c1c18c3c18c2', 'bscDayDGAT18c2c18c3c16c0', 'bscDayDGAT18c2c18c3c18c1',…
		model = addCOBRAConstraints(model, {'mcDayDGAT16c0c16c0c18c2', 'mcDayDGAT16c0c18c1c18c2', 'mcDayDGAT16c0c18c2c16c0', 'mcDayDGAT16c0c18c2c18c1', 'mcDayDGAT16c0c18c2c18c3', 'mcDayDGAT16c0c18c3c18c2', 'mcDayDGAT18c1c18c1c18c2', 'mcDayDGAT18c1c18c2c16c0', 'mcDayDGAT18c1c18c2c18c1', 'mcDayDGAT18c1c18c2c18c3', 'mcDayDGAT18c1c18c3c18c2', 'mcDayDGAT18c2c18c3c16c0', 'mcDayDGAT18c2c18c3c18c1', 'mcDayDGAT18…
	C18:3 cycling reactions	model = addCOBRAConstraints(model, {'bscDayDGAT16c0c16c0c18c3', 'bscDayDGAT16c0c18c1c18c3', 'bscDayDGAT16c0c18c2c18c3', 'bscDayDGAT16c0c18c3c16c0', 'bscDayDGAT16c0c18c3c18c1', 'bscDayDGAT16c0c18c3c18c2', 'bscDayDGAT18c1c18c1c18c3', 'bscDayDGAT18c1c18c2c18c3', 'bscDayDGAT18c1c18c3c16c0', 'bscDayDGAT18c1c18c3c18c1', 'bscDayDGAT18c1c18c3c18c2', 'bscDayDGAT18c2c18c2c18c3', 'bscDayDGAT18c2c18c3c16c0',…
		model = addCOBRAConstraints(model, {'mcDayDGAT16c0c16c0c18c3', 'mcDayDGAT16c0c18c1c18c3', 'mcDayDGAT16c0c18c2c18c3', 'mcDayDGAT16c0c18c3c16c0', 'mcDayDGAT16c0c18c3c18c1', 'mcDayDGAT16c0c18c3c18c2', 'mcDayDGAT18c1c18c1c18c3', 'mcDayDGAT18c1c18c2c18c3', 'mcDayDGAT18c1c18c3c16c0', 'mcDayDGAT18c1c18c3c18c1', 'mcDayDGAT18c1c18c3c18c2', 'mcDayDGAT18c2c18c2c18c3', 'mcDayDGAT18c2c18c3c16c0', 'mcDayDGAT18…

## Sheet: Table S7
Supplementary Table 7. Flux results of various scenarios of sucrose and TAG production (iTJC1414x4). Primary objective is to maximize sucrose, photoassimilates (Table S8), TAG synthesis, or oil droplets (Table S9). Secondary objective is to maximize ATP surplus in BSCs andMCs. Flux results from secondary optimization are in part aggregated by flux projections (3rd level objective function, see al…
		model scenario:	1			2			3			4			5			6			7			8			9			10			11			12			13			14			15			16
		reference to manuscript main text:	Table 4, scenario 1						Table 4, scenario 2, Figure 3			Table 4, scenario 3			Table 4, scenario 1						Table 4, scenario 2			Table 4, scenario 3, Figure 4			Figure 4						Table 4, scenario 1						Table 4, scenario 2			Table 4, scenario 3
		biosynthetic product / objective:	sucrose			sucrose			sucrose			Photoassimilates			TAG (BSC)			TAG (BSC)			TAG (BSC)			Oil droplets (BSC)			Oil droplets (BSC)			Oil droplets (BSC)			TAG (MC)			TAG (MC)			TAG (MC)			Oil droplets (MC)			Oil droplets (MC)			Oil droplets (MC)
		model constraints
		photon absorption ratio BS-cells/M-cells (aBS,M)	n/a			0.398436			0.398436			0.398436			n/a			0.398436			0.398436			0.398436			0.398436			0.398436			n/a			0.398436			0.398436			0.398436			0.398436			0.398436
		fraction of absorbed light that drives Linear Electron Transport in M-cells (fLETM)	n/a			n/a			0.933102			0.89511			n/a			n/a			0.933102			0.89511			0.89511			0.89511			n/a			n/a			0.933102			0.89511			0.89511			0.89511
		fraction of absorbed light that drives Linear Electron Transport in BS-cells (fLETBS)	n/a			n/a			0.0318235			0.0318235			n/a			n/a			0.0318235			0.0318235			0.0318235			0.0318235			n/a			n/a			0.0318235			0.0318235			0.0318235			0.0318235
		ratio carboxylase/oxygenase at RubisCO (BS-cells)	n/a			n/a			n/a			29.2			n/a			n/a			n/a			29.2			29.2			29.2			n/a			n/a			n/a			29.2			29.2			29.2
		CO2 leakage	n/a			n/a			n/a			0.13			n/a			n/a			n/a			0.13			0.13			0.13			n/a			n/a			n/a			0.13			0.13			0.13
		ATPdrain	n/a			n/a			n/a			0.369241			n/a			n/a			n/a			0.369241			0.369241			0.369241			n/a			n/a			n/a			0.369241			0.369241			0.369241
		NADPHdrain	n/a			n/a			n/a			0.12308			n/a			n/a			n/a			0.12308			0.12308			0.12308			n/a			n/a			n/a			0.12308			0.12308			0.12308
		Fatty acid cycling	n/a			n/a			n/a			n/a			n/a			n/a			n/a			n/a			5			0			n/a			n/a			n/a			n/a			5			0
		TAG cycling	n/a			n/a			n/a			n/a			n/a			n/a			n/a			n/a			0			5			n/a			n/a			n/a			n/a			0			5
Comment	3rd level objective function / formula to calculate summed fluxes or ratios	Description of aggregated reactions	FBA value	min	max	FBA value	min	max	FBA value	min	max	FBA value	min	max	FBA value	min	max	FBA value	min	max	FBA value	min	max	FBA value	min	max	FBA value	min	max	FBA value	min	max	FBA value	min	max	FBA value	min	max	FBA value	min	max	FBA value	min	max	FBA value	min	max	FBA value	min
ATP surplus	bscDayATPsurplus + mcDayATPsurplus	ATP surplus, BSC & MC	0	0	0	0	0	0	0	0	0	0	0	3.3087e-09	0	0	0	0	0	0	0.152964	0.152964	0.628261	0	0	0.735279	0	0	0	0	0	0.355349	0	0	0	0	0	0	0	0	0.990337	0	0	0.706559	0	0	0	0	0
ATP surplus	bscDayATPsurplus	ATP surplus, BSC	0	0	0	0	0	0	0	0	0	3.3087e-09	0	3.3087e-09	0	0	0	0	0	0	1.69162	1.21633	1.69162	1.44074	0.705458	1.44074	0	0	0	1.06081	0.705458	1.06081	0	0	0	0	0	0	0.990337	0	0.990337	0.706559	0	0.706559	0	0	0	0.326635	0
ATP surplus	mcDayATPsurplus	ATP surplus, MC	0	0	0	0	0	0	0	0	0	3.3087e-09	3.3087e-09	3.3087e-09	0	0	0	0	0	0	1.84459	1.84459	1.84459	1.44074	1.44074	1.44074	0	0	0	1.06081	1.06081	1.06081	0	0	0	0	0	0	0.990337	0.990337	0.990337	0.706559	0.706559	0.706559	0	0	0	0.326635	0.326635
NADPH surplus	bscDayNADPHsurplus + mcDayNADPHsurplus	NADPH surplus, BSC & MC	0	0	0	0	0	0	0	0	0	0	0	0	0	0	0	0	0	0	0	0	0	0	0	0	0	0	0	0	0	0	0	0	0	0	0	0	0	0	0	0	0	0	0	0	0	0	0
NADPH surplus	bscDayNADPHsurplus	NADPH surplus, BSC	0	0	0	0	0	0	0	0	0	0	0	0	0	0	0	0	0	0	0	0	0	0	0	0	0	0	0	0	0	0	0	0	0	0	0	0	0	0	0	0	0	0	0	0	0	0	0
NADPH surplus	mcDayNADPHsurplus	NADPH surplus, MC	0	0	0	0	0	0	0	0	0	0	0	0	0	0	0	0	0	0	0	0	0	0	0	0	0	0	0	0	0	0	0	0	0	0	0	0	0	0	0	0	0	0	0	0	0	0	0
light uptakes	bscDaytxLight	light uptake, BSC	8.25228	-7.23921e-12	12.5392	4.30544	4.30544	4.30544	5.23731	5.23731	5.23731	6.30133	6.30133	6.30133	11.7927	9.62884	14.5442	4.30544	4.30544	4.30544	5.23731	5.23731	5.23731	6.30133	6.30133	6.30133	6.30133	6.30133	6.30133	6.30133	6.30133	6.30133	7.92742	1.38199e-11	13.1212	4.30544	4.30544	4.30544	5.23731	5.23731	5.23731	6.30133	6.30133	6.30133	6.30133	6.30133	6.30133	6.30133	6.30133
light uptakes	mcDaytxLight	light uptake, MC	6.85903	2.57214	15.1113	10.8059	10.8059	10.8059	13.1447	13.1447	13.1447	15.8152	15.8152	15.8152	3.31864	0.567153	5.48247	10.8059	10.8059	10.8059	13.1447	13.1447	13.1447	15.8152	15.8152	15.8152	15.8152	15.8152	15.8152	15.8152	15.8152	15.8152	7.18389	1.99014	15.1113	10.8059	10.8059	10.8059	13.1447	13.1447	13.1447	15.8152	15.8152	15.8152	15.8152	15.8152	15.8152	15.8152	15.8152
photosynthetic light reactions	bscDayPhotosystemIImodchloroplast	PSII, BSC	0.892138	-2.51798e-12	1.35559	0.465453	0.465453	0.465453	0.0180183	0.0180183	0.0180183	0.0216789	0.0216789	0.0216789	1.27488	1.04096	1.57234	0.465453	0.465453	0.465453	0.0180183	0.0180183	0.0180183	0.0216789	0.0216789	0.0216789	0.0216789	0.0216789	0.0216789	0.0216789	0.0216789	0.0216789	0.857018	4.80691e-12	1.4185	0.465453	0.465453	0.465453	0.0180183	0.0180183	0.0180183	0.0216789	0.0216789	0.0216789	0.0216789	0.0216789	0.0216789	0.0216789	0.0216789
photosynthetic light reactions	bscDayMehlerReactionchloroplast	Mehler reaction, BSC	0	0	5.98233e-12	0	0	-1.62954e-11	0	0	-1.30386e-11	0	0	1.17357e-11	0	0	6.15557e-12	0	0	-5.46528e-12	0	0	2.84579e-12	0	0	-4.68124e-12	0	0	-7.07225e-12	0	0	5.35647e-12	0	0	-2.11907e-12	0	0	8.52968e-12	0	0	-1.2416e-12	0	0	7.5076e-12	0	0	7.88563e-12	0	0
photosynthetic light reactions	bscDaySUPEROXDISMUTRXNchloroplast	Superoxide Dismutase, BSC	0	0	2.99117e-12	0	0	-8.14768e-12	0	0	-6.5193e-12	0	0	5.86785e-12	0	0	3.07779e-12	0	0	-2.73264e-12	0	0	1.4229e-12	0	0	-2.34062e-12	0	0	-3.53612e-12	0	0	2.67824e-12	0	0	-1.05953e-12	0	0	4.26484e-12	0	0	-6.20801e-13	0	0	3.7538e-12	0	0	3.94281e-12	0	0
photosynthetic light reactions	bscDayChloroplasticATPasemodchloroplast	Chloroplast ATPase, BSC	0.892138	0	1.35559	0.465453	0.465453	0.465453	0.813414	0.813414	0.813414	0.978667	0.978667	0.978667	1.27488	1.04096	1.57234	0.465453	0.465453	0.465453	0.813414	0.813414	0.813414	0.978667	0.978667	0.978667	0.978667	0.978667	0.978667	0.978667	0.978667	0.978667	0.857018	0	1.4185	0.465453	0.465453	0.465453	0.813414	0.813414	0.813414	0.978667	0.978667	0.978667	0.978667	0.978667	0.978667	0.978667	0.978667
photosynthetic light reactions	bscDayComplexVmodmitochondrion	mitochondrial complex V, BSC	1.46759	0.0772414	1.93103	1.79581	0.761959	1.79581	-9.24837e-11	0	-8.08611e-11	2.35769e-11	0	2.22799e-11	0.746047	0.337289	0.746047	0.870845	0.870845	0.870845	0	0	1.48271e-12	-2.02842e-11	0	-3.02917e-12	0.707777	0.707777	0.707777	1.16867e-11	0	4.20072e-12	1.31784	-1.77693e-12	1.33155	1.33155	0.733116	1.33155	-1.13101e-11	0	1.84327e-12	2.84751e-11	0	2.58014e-11	0.58574	0	0.58574	-2.96671e-13	0
photosynthetic light reactions	mcDayPhotosystemIImodchloroplast	PSII, MC	0.741517	0.278069	1.63366	1.1682	1.1682	1.1682	1.32598	1.32598	1.32598	1.53041	1.53041	1.53041	0.358771	0.0613138	0.5927	1.1682	1.1682	1.1682	1.32598	1.32598	1.32598	1.53041	1.53041	1.53041	1.53041	1.53041	1.53041	1.53041	1.53041	1.53041	0.776637	0.215151	1.63366	1.1682	1.1682	1.1682	1.32598	1.32598	1.32598	1.53041	1.53041	1.53041	1.53041	1.53041	1.53041	1.53041	1.53041
photosynthetic light reactions	mcDayMehlerReactionchloroplast	Mehler reaction, MC	0	0	8.10169e-13	0	0	-8.73472e-12	0	0	-5.42112e-12	0	0	4.87272e-12	0	-1.53705e-27	1.06623e-11	0	0	-4.67891e-12	0	3.74015e-26	1.34148e-12	0	0	-2.79233e-12	0	0	-1.69449e-11	0	-3.59849e-27	1.02075e-11	0	0	1.90032e-12	0	0	9.78758e-12	0	0	-3.3629e-12	0	0	6.58586e-12	0	0	1.04478e-11	0	0
photosynthetic light reactions	mcDaySUPEROXDISMUTRXNchloroplast	Superoxide Dismutase, MC	0	0	4.05085e-13	0	0	-4.36736e-12	0	0	-2.71056e-12	0	0	2.43636e-12	0	-7.83765e-28	5.33115e-12	0	0	-2.33945e-12	0	1.86797e-26	6.70738e-13	0	0	-1.39616e-12	0	0	-8.47247e-12	0	-1.77119e-27	5.10374e-12	0	0	9.50162e-13	0	0	4.89379e-12	0	0	-1.68145e-12	0	0	3.29293e-12	0	0	5.22392e-12	0	0
photosynthetic light reactions	mcDayChloroplasticATPasemodchloroplast	Chloroplast ATPase, MC	0.741517	0.278069	1.63366	1.1682	1.1682	1.1682	1.46392	1.46392	1.46392	1.79062	1.79062	1.79062	0.358771	0.0613138	0.5927	1.1682	1.1682	1.1682	1.46392	1.46392	1.46392	1.79062	1.79062	1.79062	1.79062	1.79062	1.79062	1.79062	1.79062	1.79062	0.776637	0.215151	1.63366	1.1682	1.1682	1.1682	1.46392	1.46392	1.46392	1.79062	1.79062	1.79062	1.79062	1.79062	1.79062	1.79062	1.79062
photosynthetic light reactions	mcDayComplexVmodmitochondrion	mitochondrial complex V, MC	0.463448	0	1.85379	0.135229	0.135229	1.16908	0	0	-6.65952e-11	0	0	3.22112e-11	5.5037e-16	0	0.408759	-2.28723e-16	0	-2.49075e-11	-2.4042e-12	0	5.97272e-13	0	0	-1.12127e-11	-3.53305e-36	0	-5.27496e-11	0	0	4.18202e-13	0.0137054	0	1.33155	-2.65539e-16	0	0.59843	-3.85114e-17	0	-5.48999e-12	0	0	1.98434e-11	0.706964	0.706964	1.2927	0	0
photosynthetic light reactions	bscDayCyclicElectronFlowPSImodchloroplast	cyclic electron flow, BSC	0	0	1.42596e-11	0	0	-4.80152e-11	2.38619	2.38619	2.38619	2.87096	2.87096	2.87096	0	0	9.12113e-12	0	0	-2.18759e-11	2.38619	2.38619	2.38619	2.87096	2.87096	2.87096	2.87096	2.87096	2.87096	2.87096	2.87096	2.87096	0	0	-3.24686e-12	0	0	2.37956e-11	2.38619	2.38619	2.38619	2.87096	2.87096	2.87096	2.87096	2.87096	2.87096	2.87096	2.87096
photosynthetic light reactions	mcDayCyclicElectronFlowPSImodchloroplast	cyclic electron flow, MC	-9.63915e-13	0	2.63039e-12	-4.64054e-11	0	-4.1611e-11	0.413814	0.413814	0.413814	0.78064	0.78064	0.78064	0	0	1.1327e-11	0	0	-1.40368e-11	0.413814	0.413814	0.413814	0.78064	0.78064	0.78064	0.78064	0.78064	0.78064	0.78064	0.78064	0.78064	0	0	1.30611e-11	0	0	4.36007e-12	0.413814	0.413814	0.413814	0.78064	0.78064	0.78064	0.78064	0.78064	0.78064	0.78064	0.78064
mitochondrial electron transport	bscDayComplexIVmodmitochondrion	mitochondrial complex IV, BSC	0.220138	0.0115862	0.289655	0.269371	0.114294	0.269371	-1.38726e-11	-2.03157e-15	-1.76759e-11	3.53654e-12	-5.53265e-28	3.34198e-12	0.111907	0.0505933	0.111907	0.130627	0.130627	0.130627	0	3.38407e-28	-5.215e-14	-3.04263e-12	0	-4.54375e-13	0.176464	0.176464	0.176464	1.753e-12	0	6.30108e-13	0.197676	-5.82036e-13	0.199732	0.199732	0.109967	0.199732	-1.69651e-12	0	2.7649e-13	4.27126e-12	0	3.87021e-12	0.0878611	0	0.0878611	-4.45006e-14	-4.76493e-29
mitochondrial electron transport	mcDayComplexIVmodmitochondrion	mitochondrial complex IV, MC	0.0695172	2.29517e-26	0.278069	0.0202844	0.0202844	0.175361	0	0	-1.13873e-11	0	2.13847e-26	5.12675e-12	3.21049e-16	-4.26311e-28	0.0613138	-1.84713e-17	-1.60385e-26	-7.5724e-12	-3.6063e-13	1.15192e-14	1.11697e-12	0	0	-1.6819e-12	-8.83263e-37	-3.81356e-24	-7.91244e-12	0	0	6.24586e-12	0.0020558	0	0.199732	1.32769e-17	9.77564e-29	0.0897645	-2.2465e-17	0	1.21711e-12	0	0	7.41164e-12	0.176741	0.176741	0.264602	-1.86721e-36	0
exchange with the environment	mcDaytxCARBONDIOXIDE	CO2 uptake	1.344	1.344	1.344	1.344	1.344	1.344	1.344	1.344	1.344	1.33219	1.33219	1.33219	1.02177	1.02177	1.02177	1.0092	1.0092	1.0092	0.902423	0.902423	0.902423	0.969089	0.969089	0.969089	0.600396	0.600396	0.600396	0.969089	0.969089	0.969089	0.962801	0.962801	0.962801	0.962801	0.962801	0.962801	0.902423	0.902423	0.902423	0.969077	0.969077	0.969077	0.565469	0.565469	0.565469	0.969077	0.969077
exchange with the environment	msNighttxCARBONDIOXIDE	CO2 efflux	0	4.04903e-13	-4.53587e-13	0	-3.30033e-12	-7.18543e-13	0	7.92656e-13	-2.94202e-13	-0.178534	-0.178534	-0.178534	0	-2.51554e-12	-6.54975e-13	0	9.60053e-13	-9.67104e-13	0	9.33137e-13	-7.18411e-13	-0.178534	-0.178534	-0.178534	-0.178534	-0.178534	-0.178534	-0.178534	-0.178534	-0.178534	0	-1.62795e-12	1.55902e-14	0	-3.52215e-12	-4.44764e-13	0	-3.40141e-14	3.94993e-15	-0.178534	-0.178534	-0.178534	-0.178534	-0.178534	-0.178534	-0.178534	-0.178534
exchange with the environment	bscDaytxNITRATE	Nitrate uptake	0	-1.48694e-13	-4.34334e-13	0	0	-1.61548e-12	0	0	-2.1085e-12	0.0171021	0.0171021	0.0171021	0	-2.08231e-13	4.7323e-13	-1.29699e-16	-5.15941e-15	-8.03887e-13	0	-1.12528e-13	-2.43531e-13	0.00765695	0.00765695	0.00765695	0.00408596	0.00408596	0.00408596	0.00765695	0.00765695	0.00765695	0	0	3.52476e-13	-2.29759e-16	-2.79794e-13	6.18885e-13	0	-1.63866e-13	4.24701e-14	0.00765684	0.00765684	0.00765684	0.00374767	0.00374767	0.00374767	0.00765684	0.00765684
exchange with the environment	-bscDaytxSUCROSE or bscDaytxAssimilates	sucrose (or photoassimilates) export, BSC	0.112	0.112	0.112	0.112	0.112	0.112	0.112	0.112	0.112	0.0903294	0.0903294	0.0903294	0	0	1.15708e-13	0	0	-1.06368e-13	0	0	1.51941e-13	0	0	-2.04495e-13	0	0	-3.28494e-13	0	0	4.59429e-13	0	0	8.00351e-14	0	0	-5.28994e-14	0	0	7.35099e-14	0	0	4.51158e-14	0	0	4.81293e-13	0	0
exchange with the environment / accumulation in leaf	bscDayTAGsink	TAG accumulation, BSC	0	0	8.1989e-15	0	0	-4.23337e-14	0	0	-1.77953e-13	0	-8.52672e-17	7.33489e-14	0.018181	0.018181	0.018181	0.0179573	0.0179573	0.0179573	0.0160573	0.0160573	0.0160573	0.0135689	0.0135689	0.0135689	0.00724076	0.00724076	0.00724076	0.0135689	0.0135689	0.0135689	0	0	0	0	0	0	0	0	0	0	0	0	0	0	0	0	0
exchange with the environment / accumulation in leaf	mcDayTAGsink	TAG accumulation, MC	0	0	-5.63021e-15	0	0	-5.13373e-14	0	0	-1.67963e-14	0	-1.12621e-16	8.26086e-14	0	0	0	0	0	0	0	0	0	0	0	0	0	0	0	0	0	0	0.0171317	0.0171317	0.0171317	0.0171317	0.0171317	0.0171317	0.0160573	0.0160573	0.0160573	0.0135687	0.0135687	0.0135687	0.00664128	0.00664128	0.00664128	0.0135687	0.0135687
transitory starch, consumed in the night sub models.	bscDayStarchSynthesis	starch synthesis, BSC	0	0	-1.38067e-14	0	0	-5.94701e-13	0	0	-3.60202e-13	0.0297557	0.0297557	0.0297557	0	0	1.91044e-13	0	0	-1.88995e-13	0	0	3.46543e-13	0.0297557	0.0297557	0.0297557	0.0297557	0.0297557	0.0297557	0.0297557	0.0297557	0.0297557	0	0	1.22733e-13	0	0	3.15255e-13	0	0	-2.79897e-14	0.0297557	0.0297557	0.0297557	0.0297557	0.0297557	0.0297557	0.0297557	0.0297557
ATP drain	bscDayGenericATPasemod	ATP drain, BSC	0	0	9.43874e-12	0	0	-5.793e-11	0	0	1.62757e-11	0.369241	0.369241	0.369241	0	0	1.61116e-11	0	0	-6.28723e-12	0	0	-9.72171e-12	0.369241	0.369241	0.369241	0.369241	0.369241	0.369241	0.369241	0.369241	0.369241	0	0	1.88586e-12	0	0	3.24974e-11	0	0	-2.31835e-12	0.369241	0.369241	0.369241	0.369241	0.369241	0.369241	0.369241	0.369241
ATP drain	mcDayGenericATPasemod	ATP drain, MC	0	0	2.22483e-11	0	0	-4.15953e-11	0	0	-1.35385e-11	0.369241	0.369241	0.369241	0	0	1.5678e-11	0	0	-3.49539e-11	0	0	-5.92543e-12	0.369241	0.369241	0.369241	0.369241	0.369241	0.369241	0.369241	0.369241	0.369241	0	0	1.18952e-11	0	0	2.86534e-11	0	0	-2.13849e-11	0.369241	0.369241	0.369241	0.369241	0.369241	0.369241	0.369241	0.369241
NADPH drain	bscDayGenericNADPOxidasemod	NADPH drain, BSC	0	0	2.84507e-12	0	0	-7.76732e-12	0	0	-1.33096e-11	0.12308	0.12308	0.12308	0	0	4.47829e-12	0	0	-1.22169e-12	0	0	3.22696e-12	0.12308	0.12308	0.12308	0.12308	0.12308	0.12308	0.12308	0.12308	0.12308	0	0	7.75562e-13	0	0	5.57492e-12	0	0	7.99716e-13	0.12308	0.12308	0.12308	0.12308	0.12308	0.12308	0.12308	0.12308
NADPH drain	mcDayGenericNADPOxidasemod	NADPH drain, MC	0	0	1.70496e-12	0	0	-1.11265e-11	0	0	-1.4872e-11	0.12308	0.12308	0.12308	0	0	2.61872e-12	0	0	-6.0686e-12	0	0	9.15757e-13	0.12308	0.12308	0.12308	0.12308	0.12308	0.12308	0.12308	0.12308	0.12308	0	0	1.91772e-12	0	0	6.31097e-12	0	0	-2.52762e-12	0.12308	0.12308	0.12308	0.12308	0.12308	0.12308	0.12308	0.12308
CBB cycle, photorespiration	bscDayPHOSPHORIBULOKINASERXNchloroplast	Phosphoribulokinase (total RBP consumption)	1.344	1.344	1.344	1.344	1.344	1.344	1.344	1.344	1.344	1.4079	1.4079	1.4079	1.50539	1.50539	1.50539	1.48687	1.48687	1.48687	1.32955	1.32955	1.32955	1.40309	1.40309	1.40309	2.05294	2.05294	2.05294	1.40309	1.40309	1.40309	1.4185	1.4185	1.4185	1.4185	1.4185	1.4185	1.32955	1.32955	1.32955	1.40344	1.40344	1.40344	1.8987	1.8987	1.8987	1.40344	1.40344
CBB cycle, photorespiration	bscDayRXN961chloroplast	RubisCO oxygenase, BSC	0	0	0	0	0	0	0	0	0	0.0466191	0.0466191	0.0466191	0	0	0	0	0	0	0	0	0	0.0464601	0.0464601	0.0464601	0.0679781	0.0679781	0.0679781	0.0464601	0.0464601	0.0464601	0	0	0	0	0	0	0	0	0	0.0464715	0.0464715	0.0464715	0.062871	0.062871	0.062871	0.0464715	0.0464715
CBB cycle, photorespiration	2*bscDayRIBULOSEBISPHOSPHATECARBOXYLASERXNchloroplast + bscDayRXN961chloroplast	3PGA from RubisCO total, BSC	2.688	2.688	2.688	2.688	2.688	2.688	2.688	2.688	2.688	2.76917	2.76917	2.76917	3.01077	3.01077	3.01077	2.97373	2.97373	2.97373	2.6591	2.6591	2.6591	2.75973	2.75973	2.75973	4.0379	4.0379	4.0379	2.75973	2.75973	2.75973	2.83701	2.83701	2.83701	2.83701	2.83701	2.83701	2.6591	2.6591	2.6591	2.76041	2.76041	2.76041	3.73454	3.73454	3.73454	2.76041	2.76041
CBB cycle, photorespiration	bscDayGLY3KINRXNchloroplast + mcDayGLY3KINRXNchloroplast	3PGA from glycerate, BSC, MC	0	-7.24741e-29	1.10245e-12	0	4.54139e-27	-6.54005e-12	2.39313e-32	3.05834e-43	-5.02469e-11	0.020863	0.020863	0.020863	0	0	-4.51404e-13	0	-2.16456e-26	-3.65751e-13	0	0	1.13499e-12	0.0222931	0.0222931	0.0222931	0	0	0.000174502	0.0222931	0.0222931	0.0222931	4.63599e-18	-4.02312e-45	9.16072e-13	0	1.51236e-29	2.74586e-12	6.10831e-33	0	2.01116e-12	0.0222989	0.0222989	0.0222989	0.0309769	0.0309769	0.0309769	0.0222989	0.0222989
CBB cycle, photorespiration	bscDayGLY3KINRXNchloroplast	3PGA from glycerate, BSC	0	0	2.9189e-13	0	0	-4.82477e-12	0	0	-7.00838e-13	0	0	0.020863	0	0	3.52331e-13	0	0	-2.24383e-12	0	0	-1.15305e-12	0	0	0.0222931	0	0	-5.4708e-11	0	0	0.0222931	0	0	2.78277e-12	0	0	9.99708e-13	0	0	2.53254e-13	0	0	0.0222989	0	0	0.0309769	0	0
CBB cycle, photorespiration	mcDayGLY3KINRXNchloroplast	3PGA from glycerate, MC	0	0	1.10245e-12	0	0	-6.54005e-12	2.39313e-32	0	-5.02469e-11	0.020863	0	0.020863	0	0	-4.51404e-13	0	0	-3.65751e-13	0	0	1.13499e-12	0.0222931	0	0.0222931	0	0	0.000174502	0.0222931	0	0.0222931	4.63599e-18	0	9.16072e-13	0	0	2.74586e-12	6.10831e-33	0	2.01116e-12	0.0222989	0	0.0222989	0.0309769	0	0.0309769	0.0222989	0
CBB cycle, photorespiration	-mcDayEC1219 + mcDayPHOSGLYPHOSRXNchloroplast + mcDayPHOSGLYPHOSRXN	3PGA > TP, MC	1.17094e-16	-1.84807e-13	3.024	0.951835	0.951835	1.98568	1.70376	1.70376	1.70376	1.84618	1.84618	1.90638	-8.23206e-15	-0.483614	0.701786	2.053	2.053	2.053	1.74954	1.74954	2.22484	1.83347	1.83347	2.56874	2.93437	2.93437	2.93833	2.2134	2.2134	2.56874	-0.0890848	-0.455703	2.70865	1.0719	1.0719	1.67033	1.12128	1.12128	2.11162	1.40405	1.40405	2.16306	2.13087	2.13087	2.78241	1.40405	1.40405
CBB cycle, photorespiration	-bscDayEC1219 + bscDayPHOSGLYPHOSRXN + bscDayPHOSGLYPHOSRXNchloroplast	3PGA > TP, BSC	2.688	-0.336	2.688	1.73617	0.702319	1.73617	0.984241	0.984241	0.984241	0.921205	0.861001	0.921205	2.52716	1.82537	3.01077	0.443066	0.443066	0.443066	0.482431	0.00713343	0.482431	0.578825	-0.156454	0.578825	0.554328	0.550372	0.554328	0.198895	-0.156454	0.198895	2.47039	-0.327347	2.83701	1.3094	0.710972	1.3094	1.11069	0.120355	1.11069	1.00894	0.249919	1.00894	1.1002	0.448661	1.1002	1.00894	0.629843
malic enzyme	bscDayMALICNADPRXN + bscDayMALICNADPRXNchloroplast	malate > pyruvate, BSC	1.344	1.344	1.344	1.344	1.344	1.344	1.344	1.344	1.344	1.49727	1.49727	1.49727	1.02177	1.02177	1.02177	1.0092	1.0092	1.0092	0.902423	0.902423	0.902423	1.14313	1.14313	1.14313	1.27649	1.27649	1.27649	1.14313	1.14313	1.14313	1.4185	1.4185	1.4185	1.4185	1.4185	1.4185	1.32955	1.32955	1.32955	1.50786	1.50786	1.50786	2.04194	2.04194	2.04194	1.50786	1.50786
malic enzyme	mcDayMALICNADPRXN + mcDayMALICNADPRXNchloroplast	malate > pyruvate, MC	0	0	1.12624e-11	0	0	-8.77364e-12	0	0	-5.95341e-12	0	0	2.11929e-11	0	0	1.44426e-11	0	0	-1.10139e-11	0	0	1.91488e-13	0	0	1.25994e-11	0	0	-3.4028e-11	0	0	5.37662e-11	0	0	8.60533e-12	0	0	1.34453e-11	0	0	1.69459e-12	0	0	1.76064e-11	0	0	1.37561e-11	0	0
PEP carboxylase	bscDayPEPCARBOXRXN	phosphoenol pyruvate carboxylase, BSC	0	0	2.61406e-12	0	0	-2.61699e-11	0	0	-5.7654e-12	0	0	1.73939e-11	0	0	8.36651e-12	0	0	3.16279e-12	0	0	-4.80206e-12	0	0	1.088e-11	0	0	-5.51853e-11	0	0	3.7739e-11	0	0	-1.28599e-12	0	0	1.49459e-11	0	0	4.39214e-12	0	0	1.73281e-11	0	0	2.50356e-11	0	0
PEP carboxylase	mcDayPEPCARBOXRXN	phosphoenol pyruvate carboxylase, MC	1.344	1.344	1.344	1.344	1.344	1.344	1.344	1.344	1.344	1.50915	1.50915	1.50915	1.02177	1.02177	1.02177	1.0092	1.0092	1.0092	0.902423	0.902423	0.902423	1.14545	1.14545	1.14545	0.858441	0.858441	0.858441	1.14545	1.14545	1.14545	1.4185	1.4185	1.4185	1.4185	1.4185	1.4185	1.32955	1.32955	1.32955	1.51018	1.51018	1.51018	1.68959	1.68959	1.68959	1.51018	1.51018
malate dehydrogenase	-bscDayMalateDHPeroxisome -bscDayMalateDH -bscDayMALATEDEHRXNmitochondrion + bscDayMALATEDEHYDROGENASENADPRXNchloroplast	OXA > malate, BSC	0	-1.12933e-12	1.344	1.11022e-16	1.02323e-11	1.344	0.395796	0.395796	0.395796	0.456473	0.445043	0.534314	0.304228	0.143024	0.538157	0.725801	0.725801	0.725801	-2.77556e-17	1.58318e-12	0.475297	0.0686402	0.0686402	0.803919	0.50552	0.50552	0.50552	0.44857	0.44857	0.803919	0.266798	0.131343	1.4185	0.640545	0.640545	1.4185	0.254893	0.254893	1.24523	0.391464	0.391464	1.15095	0.672718	0.672718	1.48015	0.391464	0.391464
malate dehydrogenase	-mcDayMalateDHPeroxisome -mcDayMalateDH -mcDayMALATEDEHRXNmitochondrion + mcDayMALATEDEHYDROGENASENADPRXNchloroplast	OXA > malate, MC	1.344	2.05554e-12	1.344	1.344	2.78539e-11	1.344	0.948204	0.948204	0.948204	1.0408	0.962955	1.05223	0.717543	0.483614	0.878747	0.283401	0.283401	0.283401	0.902423	0.427125	0.902423	1.07412	0.338845	1.07412	0	1.63964e-11	-2.70254e-11	0.694194	0.338845	0.694194	1.15171	-5.49338e-13	1.28716	0.777959	-4.75098e-12	0.777959	1.07466	0.0843187	1.07466	1.11603	0.356544	1.11603	0.662079	-0.145351	0.662079	1.11603	0.736469
pyruvate:orthophosphate dikinase	-(mcDayPEPDEPHOSRXN + mcDayPEPDEPHOSRXNchloroplast - mcDayPYRUVATEORTHOPHOSPHATEDIKINASERXNchloroplast)	pyruvate > PEP, MC	1.344	1.344	1.344	1.344	1.344	1.344	1.344	1.344	1.344	1.48659	1.48659	1.48659	0.538157	0.538157	0.538157	0.725801	0.725801	0.725801	0.475297	0.475297	0.475297	0.776452	0.776452	0.776452	0.970699	0.970524	0.970699	0.776452	0.776452	0.776452	0.962801	0.962801	0.962801	0.962801	0.962801	0.962801	0.902423	0.902423	0.902423	1.14119	1.14119	1.14119	1.15551	1.15551	1.15551	1.14119	1.14119
plasmodesmata transport	-plasmodesmatamcDayMALbscDayMAL	malate (MC) > (BSC)	1.344	0	1.344	1.344	0	1.344	0.948204	0.948204	0.948204	1.0408	0.962955	1.05223	0.717543	0.483614	0.878747	0.283401	0.283401	0.283401	0.902423	0.427125	0.902423	1.07412	0.338845	1.07412	0	0	-4.59201e-11	0.694194	0.338845	0.694194	1.15171	0	1.28716	0.777959	0	0.777959	1.07466	0.0843187	1.07466	1.1164	0.356911	1.1164	1.36922	0.561793	1.36922	1.1164	0.736835
plasmodesmata transport	plasmodesmatamcDayPYRUVATEbscDayPYRUVATE	pyruvate (BSC) > (MC)	1.344	0	1.344	1.344	0	1.344	0.948204	0.948204	0.948204	1.05757	0.940388	1.069	0.233929	0	0.395133	-9.03561e-11	0	-6.60499e-11	0.475297	0	0.475297	0.735279	0	0.735279	0.115627	0.111496	0.115627	0.355349	0	0.355349	1.15171	0	1.28716	0.777959	0	0.777959	1.07466	0.0843187	1.07466	1.13935	0.349703	1.13935	1.40052	0.558265	1.40052	1.13935	0.729627
plasmodesmata transport	-plasmodesmatamcDayLASPARTATEbscDayLASPARTATE	Asp (MC) > (BSC)	0	0	1.344	0	0	1.344	0.395796	0.395796	0.395796	0.468356	0.456927	0.546198	0.304228	0.143024	0.538157	0.725801	0.725801	0.725801	0	0	0.475297	0.0713268	0.0713268	0.806606	0.858441	0.858441	0.858441	0.451257	0.451257	0.806606	0.266798	0.131343	1.4185	0.640545	0.640545	1.4185	0.254893	0.254893	1.24523	0.392686	0.392686	1.15217	0.673316	0.673316	1.48075	0.392686	0.392686
plasmodesmata transport	plasmodesmatamcDayLalaninebscDayLalanine	Ala (BSC) > (MC)	-2.49064e-33	0	1.344	-1.12169e-17	0	1.344	0.395796	0.395796	0.395796	0.429015	0.417585	0.546198	0.304228	0.143024	0.538157	0.725801	0.725801	0.725801	0	0	0.475297	0.0411732	0.0411732	0.776452	0.855072	0.855072	0.859028	0.421103	0.421103	0.776452	0.266798	0.131343	1.4185	0.640545	0.640545	1.4185	0.254893	0.254893	1.24523	0.367292	0.367292	1.15694	0.640824	0.640824	1.48308	0.367292	0.367292
plasmodesmata transport	plasmodesmatamcDayG3PbscDayG3P	3PGA (BSC) > (MC)	0	0	3.024	0.951835	0.951835	1.98568	1.70376	1.70376	1.70376	1.84788	1.84788	1.92895	0.483614	0	1.1854	2.3364	2.3364	2.3364	2.17667	2.17667	2.65196	2.18017	2.18017	2.93774	2.82253	2.82253	2.82666	2.5601	2.5601	2.93774	0.366618	0	3.16436	1.52761	1.52761	2.12604	1.5484	1.5484	2.53874	1.75147	1.75147	2.53279	2.63434	2.63434	3.31685	1.75147	1.75147
plasmodesmata transport	-plasmodesmatamcDayGAPbscDayGAP	TP (MC) > (BSC)	1.17094e-16	-6.24901e-11	3.024	0.951835	0.951835	1.98568	1.70376	1.70376	1.70376	1.84618	1.84618	1.90638	-6.88299e-31	-0.483614	0.701786	2.053	2.053	2.053	1.74954	1.74954	2.22484	1.83347	1.83347	2.56874	2.93437	2.93437	2.93833	2.2134	2.2134	2.56874	-0.106217	-0.472835	2.69152	1.05477	1.05477	1.6532	1.10522	1.10522	2.09556	1.38964	1.38964	2.14866	2.12382	2.12382	2.77536	1.38964	1.38964
plasmodesmata transport	plasmodesmatamcDayGLYCERATEbscDayGLYCERATE	glycerate (BSC) > (MC)	0	-7.64726e-13	1.10501e-12	0	4.05673e-12	-6.52838e-12	2.39313e-32	1.41408e-11	-1.31655e-11	0.020863	-5.0217e-12	0.020863	0	-2.59272e-12	-4.51404e-13	0	2.67706e-12	-3.13225e-12	0	-4.83547e-13	-4.15227e-13	0.0222931	2.78452e-12	0.0222931	0	1.13623e-15	0.000174502	0.0222931	-3.3859e-12	0.0222931	4.63599e-18	-1.4561e-12	3.42614e-13	0	-1.64484e-12	2.74586e-12	-1.32482e-33	6.42729e-13	1.01344e-12	0.0222989	-5.29458e-12	0.0222989	0.0309769	3.46843e-13	0.0309769	0.0222989	3.64951e-12
plasmodesmata transport	plasmodesmatamcDayphosphoenolpyruvatebscDayphosphoenolpyruvate	PEP (BSC) > (MC)	0	0	0	0	0	0	0	0	0	0	0	0	0	0	0	0	0	0	0	0	0	0	0	0	0	0	0	0	0	0	0	0	0	0	0	0	0	0	0	0	0	0	0	0	0	0	0
plasmodesmata transport	plasmodesmatamcDayGLYCOLLATEbscDayGLYCOLLATE	Glycollate (BSC) > (MC)	0	0	0	0	0	0	0	0	0	0	0	0	0	0	0	0	0	0	0	0	0	0	0	0	0	0	0	0	0	0	0	0	0	0	0	0	0	0	0	0	0	0	0	0	0	0	0
plasmodesmata transport	plasmodesmatamcDayGLYbscDayGLY	Gly (BSC) > (MC)	4.6177e-49	-1.13672e-12	4.05812e-13	-5.59584e-33	9.71003e-12	-9.1348e-12	6.89997e-17	-4.11944e-12	2.26173e-13	-3.6151e-17	-1.96975e-12	1.73549e-11	-1.12614e-15	1.01591e-12	-6.24703e-13	-1.39847e-16	5.78232e-12	-2.70312e-12	0	-2.19686e-12	5.87761e-13	1.78918e-17	-2.37483e-12	3.23428e-11	2.19932e-34	3.34497e-12	-3.35666e-11	-1.28194e-16	-1.59031e-11	6.65724e-11	5.56318e-18	-5.17855e-12	-3.84316e-12	-4.48296e-32	-4.88952e-12	4.47862e-12	2.07905e-17	-9.45395e-13	5.81236e-13	-0.000894179	-0.000894179	-0.000894179	-0.00043766	-0.00043766	-0.00043766	-0.000894179	-0.000894179
plasmodesmata transport	plasmodesmatamcDayWATERbscDayWATER	water (BSC) > (MC)	1.344	-2.49246e-11	1.344	1.344	4.69676e-11	1.344	0.948204	0.948204	0.948204	1.02279	0.980057	1.03136	0.717543	0.483614	0.878747	0.283401	0.283401	0.283401	0.902423	0.427125	0.902423	1.05183	0.316552	1.05183	-3.91566e-17	-0.000174502	-5.70635e-11	0.671901	0.316552	0.671901	1.01808	-0.133627	1.15353	0.644332	-0.133627	0.644332	0.949408	-0.0409287	0.949408	0.962495	0.232966	0.962495	0.920351	0.147645	0.920351	0.962495	0.61289
plasmodesmata transport	plasmodesmatamcDayphosphatebscDayphosphate	phosphate (BSC) > (MC)	5.86266e-16	-6.23061e-11	-3.06999e-13	6.36841e-16	8.38038e-11	-2.61657e-11	-1.49611e-29	8.5002e-12	1.05634e-11	-0.00170312	-0.0225661	-0.00170312	-0.483614	-0.483614	-0.483614	-0.283401	-0.283401	-0.283401	-0.427125	-0.427125	-0.427125	-0.346706	-0.368999	-0.346706	0.111845	0.111671	0.111845	-0.346706	-0.368999	-0.346706	-0.472835	-0.472835	-0.472835	-0.472835	-0.472835	-0.472835	-0.443183	-0.443183	-0.443183	-0.361831	-0.384129	-0.361831	-0.510519	-0.541496	-0.510519	-0.361831	-0.384129
plasmodesmata transport	plasmodesmatamcDayNITRATEbscDayNITRATE	nitrate (BSC) > (MC)	0	0	-4.34334e-13	0	0	-1.58255e-12	0	0	-1.01942e-12	0.0028574	0	0.0171021	0	0	6.09113e-14	0	0	-3.73697e-13	0	0	1.62837e-15	0	0	0.00765695	0	0	-2.04947e-11	0	0	0.00765695	0	0	-3.11059e-13	0	0	5.65073e-13	0	0	-1.56856e-13	0	0	0.00765684	0	0	0.00374767	0	0
plasmodesmata transport	plasmodesmatamcDayAMMONIAbscDayAMMONIA	Ammonia (BSC) > (MC)	2.49064e-33	-2.68318e-11	1.63762e-11	1.12169e-17	4.17265e-11	-4.16886e-11	-1.37999e-16	2.66449e-12	-5.81139e-12	0.0364842	-0.0171021	0.0393416	7.93379e-18	-1.56683e-11	2.86951e-11	-1.29012e-16	1.72632e-11	-1.13586e-11	0	3.71778e-14	2.31971e-11	0.0301536	-0.00765695	0.0301536	0.00378185	1.19437e-10	0.00378185	0.0301536	-0.00765695	0.0301536	1.58715e-17	-2.59791e-12	-7.08143e-12	-2.29759e-16	-2.56046e-11	2.21793e-11	2.73349e-18	1.84339e-12	-6.36019e-12	0.0307291	-0.00708695	0.0307291	0.0351032	-0.00346874	0.0351032	0.0307291	-0.00708695
plasmodesmata transport	plasmodesmatamcDaySULFATEbscDaySULFATE	Sulfate (BSC) > (MC)	0	0	0	0	0	0	0	0	0	0	0	0	0	0	0	0	0	0	0	0	0	0	0	0	0	0	0	0	0	0	0	0	0	0	0	0	0	0	0	0	0	0	0	0	0	0	0
plasmodesmata transport	plasmodesmatamcDayoxygenbscDayoxygen	Oxygen (BSC) > (MC)	0.672	-0.289655	1.344	0.196083	0.196083	0.35116	0.0180183	0.0180183	0.0180183	-0.10979	-0.10979	-0.10979	1.03935	0.805417	1.39812	0.212717	0.212717	0.212717	-0.0911716	-0.0911716	-0.0911716	-0.20182	-0.20182	-0.20182	-0.709474	-0.709474	-0.709474	-0.20182	-0.20182	-0.20182	0.659342	-0.199732	1.4185	0.265721	0.265721	0.355486	0.0180183	0.0180183	0.0180183	-0.109569	-0.109569	-0.109569	-0.222029	-0.222029	-0.134168	-0.109569	-0.109569
plasmodesmata transport	plasmodesmatamcDayMG2bscDayMG2	Mg2 (BSC) > (MC)	0	0	0	0	0	0	0	0	0	0	0	0	0	0	0	0	0	0	0	0	0	0	0	0	0	0	0	0	0	0	0	0	0	0	0	0	0	0	0	0	0	0	0	0	0	0	0
plasmodesmata transport	plasmodesmatamcDayGLUbscDayGLU	Glu (BSC) > (MC)	0	0	0	0	0	0	0	0	0	0	0	0	0	0	0	0	0	0	0	0	0	0	0	0	0	0	0	0	0	0	0	0	0	0	0	0	0	0	0	0	0	0	0	0	0	0	0
plasmodesmata transport	plasmodesmatamcDay2KETOGLUTARATEbscDay2KETOGLUTARATE	Ketoglutarate (BSC) > (MC)	0	0	0	0	0	0	0	0	0	0	0	0	0	0	0	0	0	0	0	0	0	0	0	0	0	0	0	0	0	0	0	0	0	0	0	0	0	0	0	0	0	0	0	0	0	0	0
plasmodesmata transport	plasmodesmatamcDayCYSbscDayCYS	Cys (BSC) > (MC)	8.87013e-49	-1.96884e-13	8.09321e-14	-5.59584e-33	3.05798e-12	-3.87476e-12	6.89997e-17	-3.47794e-13	-2.0903e-14	-3.6151e-17	-3.75975e-12	4.86979e-12	-1.12614e-15	-1.34203e-12	1.73762e-12	-1.39847e-16	2.24229e-12	-2.68381e-12	0	-3.04411e-12	9.74651e-13	1.78918e-17	1.41707e-12	-2.49625e-12	-5.72331e-36	9.23622e-13	-3.44793e-12	-1.28194e-16	-8.73157e-12	1.41192e-11	-4.62197e-32	-1.23432e-12	-4.67905e-13	0	-9.60489e-13	1.52846e-12	2.07905e-17	-1.32991e-12	-1.17716e-12	-0.00113977	-0.00113977	-0.00113977	-0.000557868	-0.000557868	-0.000557868	-0.00113977	-0.00113977
plasmodesmata transport	plasmodesmatamcDayGLUTATHIONEbscDayGLUTATHIONE	Glutathione (BSC) > (MC)	-4.6177e-49	-8.09321e-14	1.96884e-13	5.59584e-33	3.87476e-12	-3.05798e-12	-6.89997e-17	-1.98517e-13	3.47794e-13	3.6151e-17	-4.86979e-12	3.75975e-12	1.12614e-15	-1.73762e-12	1.34203e-12	1.39847e-16	2.68381e-12	-2.24229e-12	0	-9.74651e-13	3.04411e-12	-1.78918e-17	2.49625e-12	-1.41707e-12	0	3.44793e-12	-9.23622e-13	1.28194e-16	-1.41192e-11	8.73157e-12	4.48639e-32	4.67905e-13	1.23432e-12	0	-1.52846e-12	9.60489e-13	-2.07905e-17	1.17716e-12	1.32991e-12	0.00122119	0.00122119	0.00122119	0.000597715	0.000597715	0.000597715	0.00122119	0.00122119
plasmodesmata transport	plasmodesmatamcDayPROTONbscDayPROTON	Proton (BSC) > (MC)	-1.344	-1.344	1.68	-0.392165	-0.392165	0.641681	0.359759	0.359759	0.359759	0.379222	0.376365	0.41433	-1.02177	-1.50539	-0.319985	1.0438	1.0438	1.0438	0.847117	0.847117	1.32241	0.718168	0.718168	1.45345	2.07971	2.07971	2.07989	1.0981	1.0981	1.45345	-1.05189	-1.4185	1.74585	0.109102	0.109102	0.707533	0.218856	0.218856	1.20919	0.314505	0.314505	1.05102	1.37418	1.37418	1.99465	0.47733	0.47733
plasmodesmata transport	plasmodesmatamcDaySERbscDaySER	serine (BSC) > (MC)	0	-1.36433e-12	6.77536e-12	0	1.54571e-11	-1.90034e-11	6.12741e-30	5.65422e-12	1.38582e-12	0	-6.39776e-12	1.71459e-11	-7.49976e-48	-6.79444e-12	7.08345e-12	-1.14496e-18	2.84932e-11	-2.70533e-12	0	2.80963e-13	8.75071e-12	0	-3.03383e-11	1.13351e-12	-0.000412723	-0.000587225	-0.000412723	0	-7.89061e-11	4.19527e-11	-7.41758e-18	-8.97389e-13	-2.05664e-12	0	-7.85423e-12	2.60834e-12	1.3765e-32	-9.47167e-13	1.14111e-12	0.000692005	0.000692005	0.000692005	0.000338705	0.000338705	0.000338705	0.000692005	0.000692005
plasmodesmata transport	plasmodesmatamcDayCO2bscDayCO2	CO2 leakage	0	0	0	0	0	0	0	0	0	0.176966	0.176966	0.176966	0	0	0	0	0	0	0	0	0	0.176362	0.176362	0.176362	0.258045	0.258045	0.258045	0.176362	0.176362	0.176362	0	0	0	0	0	0	0	0	0	0.176406	0.176406	0.176406	0.238658	0.238658	0.238658	0.176406	0.176406
plasmodesmata transport	plasmodesmatamcDaySUCROSEbscDaySUCROSE	sucrose (BSC) > (MC)	-3.93196e-33	-4.97684e-12	1.42909e-11	0	4.20942e-12	-3.07668e-11	-3.72948e-12	-3.5163e-13	2.78535e-13	0	2.19973e-12	2.56225e-13	-2.05801e-15	-2.6675e-12	2.89552e-12	0	3.33943e-12	-4.28459e-12	0	-7.22326e-13	1.05586e-11	0	-7.88311e-12	3.53413e-13	0	2.19361e-11	-1.7014e-11	0	-7.84608e-12	1.18605e-11	0	-2.79104e-12	-1.43719e-14	0	-5.58447e-12	3.94374e-12	0	-2.48714e-12	-3.9409e-12	0	-1.14828e-11	1.36647e-12	0	-2.05028e-11	1.26985e-11	0	4.5922e-12
lower glycolysis	bscDay2PGADEHYDRATRXN + bscDay2PGADEHYDRATRXNChloroplast	2PGA > PEP BSC	0	0	3.06954e-11	0	2.27374e-13	-2.60343e-11	-1.49201e-11	1.13687e-13	1.31877e-11	8.85228e-05	8.85228e-05	8.85228e-05	0	8.88178e-16	1.60894e-11	0.194264	0.194264	0.194264	-7.88333e-12	-1.13687e-13	2.84217e-12	0.000732722	0.000732722	0.000732722	0.661044	0.66087	0.661044	0.000732722	0.000732722	0.000732722	0	0	-5.38858e-12	-1.39258e-12	0	2.35332e-11	-3.35496e-12	1.13687e-13	1.7053e-12	0	2.27374e-13	-3.66072e-11	2.66099e-11	1.33227e-15	5.06719e-11	-4.1058e-43	1.13687e-13
lower glycolysis	mcDay2PGADEHYDRATRXN + mcDay2PGADEHYDRATRXNChloroplast	2PGA > PEP MC	-1.17094e-16	-8.6402e-12	2.04636e-12	1.37265e-16	3.44471e-11	-8.6402e-12	1.49193e-11	1.33072e-12	-2.77187e-11	0.0225661	0.0225661	0.0225661	0.483614	0.483614	0.483614	0.283401	0.283401	0.283401	0.427125	0.427125	0.427125	0.368999	0.368999	0.368999	-0.112258	-0.112258	-0.112083	0.368999	0.368999	0.368999	0.455703	0.455703	0.455703	0.455703	0.455703	0.455703	0.427125	0.427125	0.427125	0.369726	0.369726	0.369726	0.534446	0.534446	0.534446	0.369726	0.369726
lower glycolysis	bscDayPEPDEPHOSRXN + bscDayPEPDEPHOSRXNchloroplast - bscDayPYRUVATEORTHOPHOSPHATEDIKINASERXNchloroplast	PEP > pyruvate, BSC	0	0	3.05765e-11	0	0	-2.60655e-11	-1.49201e-11	0	3.96385e-12	-1.05406e-12	0	-2.89528e-12	0	0	1.60893e-11	0.194264	0.194264	0.194264	-7.88333e-12	0	2.98656e-12	-7.22977e-12	0	5.73016e-12	0.660653	0.660479	0.660653	4.01515e-11	0	5.72564e-11	0	0	-5.76652e-12	-1.39258e-12	0	2.32885e-11	-3.35496e-12	0	-2.98001e-12	0	0	5.92031e-11	2.66099e-11	0	5.06721e-11	0	0
Pyruvate dehydrogenase complex entry into fatty acid synthesis	bscDayRXN01133Chloroplast	pyruvate > Ac-CoA, BSC	0	0	3.64275e-13	0	-1.30819e-27	-6.98299e-12	0	-9.97916e-46	-6.39709e-13	9.66524e-05	0	9.66524e-05	0.483614	0.483614	0.483614	0.477665	0.477665	0.477665	0.427125	0.427125	0.427125	0.361708	0.361708	0.361708	0.963796	0.963796	0.963796	0.361708	0.361708	0.361708	0	0	4.96576e-13	0	0	2.99575e-12	0	2.17664e-64	2.21183e-12	1.56026e-20	0	1.53045e-12	1.56026e-20	0	-8.94358e-14	0	0
Pyruvate dehydrogenase complex entry into fatty acid synthesis	mcDayRXN01133Chloroplast	pyruvate > Ac-CoA, MC	0	0	1.03938e-12	0	0	-4.25925e-12	0	0	-1.67864e-12	0	0	2.16667e-12	0	0	3.15321e-12	0	2.95337e-27	-1.57942e-12	0	0	-3.03937e-13	0	2.33061e-28	1.49146e-12	-2.69872e-16	1.83635e-27	-5.56155e-16	0	0	5.78152e-12	0.455703	0.455703	0.455703	0.455703	0.455703	0.455703	0.427125	0.427125	0.427125	0.361703	0.361703	0.361703	0.884002	0.884002	0.884002	0.361703	0.361703
Chloroplast generated fatty acids	bscDayChloroplastOleateExchange + bscDayChloroplastPalmitateExchange + bscDayChloroplastStearicAcidExchange	Chloroplast FA exchange, BSC	0	2.06058e-18	-2.0083e-13	2.92515e-36	1.86948e-17	-6.42558e-13	0	7.59763e-14	-2.11047e-13	0	5.16348e-17	4.66319e-13	0.0545429	0.0545429	0.0545429	0.053872	0.053872	0.053872	0.048172	0.048172	0.048172	0.0407068	0.0407068	0.0407068	0.108611	0.108611	0.108611	0.0407068	0.0407068	0.0407068	-2.01948e-28	-1.00574e-29	2.19813e-13	0	0	3.74468e-13	-4.17956e-35	-4.93049e-31	2.15047e-13	0	0	1.91306e-13	0	0	0	-1.95033e-21	0
Chloroplast generated fatty acids	mcDayChloroplastOleateExchange + mcDayChloroplastPalmitateExchange + mcDayChloroplastStearicAcidExchange	Chloroplast FA exchange, MC	0	2.23267e-30	1.596e-13	0	2.38705e-16	-5.40144e-13	0	6.70874e-30	1.46382e-13	0	-1.02168e-16	-1.28347e-13	8.23206e-15	-8.35184e-18	3.94151e-13	0	0	-1.97428e-13	0	3.70741e-30	4.60627e-14	0	-5.86025e-17	6.04418e-14	0	0	0	0	0	7.2269e-13	0.0513951	0.0513951	0.0513951	0.0513951	0.0513951	0.0513951	0.048172	0.048172	0.048172	0.0407062	0.0407062	0.0407062	0.0996192	0.0996192	0.0996192	0.0407062	0.0407062
Chloroplast generated fatty acids - fatty acids entering peroxisomal degradation	bscDayChloroplastOleateExchange + bscDayChloroplastPalmitateExchange + bscDayChloroplastStearicAcidExchange -(bscDayPeroxisomeStearicAcidExchange + bscDayPeroxisomePalmitateExchange + bscDayPeroxisomeOleateExchange + bscDayPeroxisomeLinoleicAcidExchange + bscDayPeroxisomeLinolenicAcidExchange)	FA into TAG synthesis, BSC	0	2.06058e-18	2.4599e-14	3.34096e-52	2.99116e-17	-1.26971e-13	0	1.49558e-17	-4.63605e-13	0	-7.72393e-17	2.20047e-13	0.0545429	0.0545429	0.0545429	0.053872	0.053872	0.053872	0.048172	0.048172	0.048172	0.0407068	0.0407068	0.0407068	0.0217223	0.0217223	0.0217223	0.0407068	0.0407068	0.0407068	2.01948e-28	-4.71317e-18	4.7466e-15	0	0	4.1998e-14	0	1.01176e-29	7.61455e-14	0	0	1.9884e-16	0	4.48703e-25	0	-3.76158e-37	0
Chloroplast generated fatty acids - fatty acids entering peroxisomal degradation	mcDayChloroplastOleateExchange + mcDayChloroplastPalmitateExchange + mcDayChloroplastStearicAcidExchange -(mcDayPeroxisomeStearicAcidExchange + mcDayPeroxisomePalmitateExchange + mcDayPeroxisomeOleateExchange + mcDayPeroxisomeLinoleicAcidExchange + mcDayPeroxisomeLinolenicAcidExchange)	FA into TAG synthesis, MC	0	-1.71635e-31	-1.68906e-14	0	1.62834e-16	-1.54012e-13	0	4.51711e-17	-5.0389e-14	0	-1.02018e-16	2.47826e-13	0	-1.33945e-16	4.26563e-14	0	4.96742e-17	-7.98169e-14	0	-3.42641e-17	8.96961e-14	0	-5.86024e-17	1.15942e-16	0	1.02222e-16	-2.3559e-17	0	0	5.08111e-16	0.0513951	0.0513951	0.0513951	0.0513951	0.0513951	0.0513951	0.048172	0.048172	0.048172	0.0407062	0.0407062	0.0407062	0.0199238	0.0199238	0.0199238	0.0407062	0.0407062
TAG cycling	3*(bscDayLipase16c0c16c0c16c0 + bscDayLipase16c0c16c0c18c1 + bscDayLipase16c0c16c0c18c2 + bscDayLipase16c0c16c0c18c3 + bscDayLipase16c0c18c1c18c1 + bscDayLipase16c0c18c1c18c2 + bscDayLipase16c0c18c1c18c3 + bscDayLipase16c0c18c2c18c2 + bscDayLipase16c0c18c2c18c3 + bscDayLipase16c0c18c3c18c3 + bscDayLipase18c1c18c1c18c1 + bscDayLipase18c1c18c1c18c2 + bscDayLipase18c1c18c1c18c3 + bscDayLipase18c1c18…	TAG lipase FA flux, BSC	0	-2.61223e-14	4.79971e-12	0	1.71371e-13	-2.06573e-11	0	4.38263e-13	-1.00689e-13	0	1.43606e-28	2.03777e-11	0	0	7.46786e-12	0	0	-5.59966e-12	0	0	-6.17118e-12	0	0	5.28884e-12	0	0	-2.1417e-11	0.162827	0.162827	0.162827	0	-1.25794e-14	8.08225e-13	0	0	1.55564e-11	0	1.12213e-14	-6.08016e-12	0	-1.17683e-16	-4.11703e-12	0	1.03869e-24	2.84373e-11	0	0
TAG cycling	3*(mcDayLipase16c0c16c0c16c0 + mcDayLipase16c0c16c0c18c1 + mcDayLipase16c0c16c0c18c2 + mcDayLipase16c0c16c0c18c3 + mcDayLipase16c0c18c1c18c1 + mcDayLipase16c0c18c1c18c2 + mcDayLipase16c0c18c1c18c3 + mcDayLipase16c0c18c2c18c2 + mcDayLipase16c0c18c2c18c3 + mcDayLipase16c0c18c3c18c3 + mcDayLipase18c1c18c1c18c1 + mcDayLipase18c1c18c1c18c2 + mcDayLipase18c1c18c1c18c3 + mcDayLipase18c1c18c2c18c2 + mcDa…	TAG lipase FA flux, MC	0	2.19578e-14	1.24105e-12	0	3.08024e-14	-2.13817e-11	0	5.0389e-14	8.38439e-14	0	-5.93173e-14	3.96926e-12	0	-1.99964e-14	6.78265e-12	0	9.49124e-15	-1.87212e-11	0	5.224e-15	6.5564e-12	0	-1.81418e-17	8.38939e-12	0	7.70996e-17	-3.65857e-11	0	-4.11196e-17	2.78871e-11	0	0	2.7026e-12	0	0	1.29551e-11	0	0	-6.40473e-12	0	0	1.24479e-11	2.61187e-35	0	1.58049e-11	0.162825	0.162825
Fatty acid cycling	bscDayPeroxisomeStearicAcidExchange + bscDayPeroxisomePalmitateExchange + bscDayPeroxisomeOleateExchange + bscDayPeroxisomeLinoleicAcidExchange + bscDayPeroxisomeLinolenicAcidExchange	Peroxisome FA exchange, BSC	0	-2.57395e-28	2.4126e-13	2.92515e-36	-3.56608e-27	-6.37353e-13	0	7.59763e-14	3.22762e-13	0	0	4.66319e-13	0	0	2.16252e-13	0	-2.84022e-28	-2.08557e-13	0	-1.08616e-27	4.33887e-14	0	2.82843e-33	-1.36352e-13	0.0868891	0.0868891	0.0868891	0	0	1.28827e-12	-4.03897e-28	0	-1.81524e-13	0	9.18053e-30	5.54405e-13	-4.17956e-35	0	2.52516e-14	0	0	1.91306e-13	0	0	-4.48703e-25	-1.95033e-21	0
Fatty acid cycling	mcDayPeroxisomeStearicAcidExchange + mcDayPeroxisomePalmitateExchange + mcDayPeroxisomeOleateExchange + mcDayPeroxisomeLinoleicAcidExchange + mcDayPeroxisomeLinolenicAcidExchange	Peroxisome FA exchange, MC	0	0	-4.87673e-14	0	1.98728e-30	-3.39169e-13	0	6.38141e-29	-3.57954e-15	0	4.48416e-44	6.53388e-13	8.23206e-15	0	2.74773e-13	0	1.32799e-28	-1.97428e-13	0	-2.25419e-14	-5.76404e-14	0	0	6.04418e-14	0	2.3559e-17	-1.02222e-16	0	0	7.2269e-13	0	0	1.20905e-13	0	0	1.7713e-13	0	0	1.47792e-13	0	0	1.48301e-12	0.0796954	0.0796954	0.0796954	2.15151e-51	0
Fatty acid cycling	9*bscDayPeroxisomeStearicAcidExchange + 8*bscDayPeroxisomePalmitateExchange + 9*bscDayPeroxisomeOleateExchange + 9*bscDayPeroxisomeLinoleicAcidExchange + 9*bscDayPeroxisomeLinolenicAcidExchange	Peroxisome ac-CoA output, BSC	0	2.21375e-27	1.93007e-12	2.63264e-35	-3.13479e-26	-5.09885e-12	0	6.07811e-13	-2.32351e-11	0	0	3.73055e-12	0	0	1.73002e-12	0	-2.56048e-27	-1.66846e-12	0	-9.77545e-27	3.53567e-13	0	0	-1.09081e-12	0.770778	0.770778	0.770778	0	0	1.03062e-11	-3.23117e-27	0	-1.40017e-12	0	8.26248e-29	4.43524e-12	-3.76161e-34	0	2.02013e-13	0	0	1.53045e-12	0	0	-4.03832e-24	-1.56026e-20	0
Fatty acid cycling	9*mcDayPeroxisomeStearicAcidExchange + 8*mcDayPeroxisomePalmitateExchange + 9*mcDayPeroxisomeOleateExchange + 9*mcDayPeroxisomeLinoleicAcidExchange + 9*mcDayPeroxisomeLinolenicAcidExchange	Peroxisome ac-CoA output, MC	0	0	-3.91522e-13	0	0	-4.38055e-12	0	5.74326e-28	5.28172e-13	0	3.58732e-43	5.2271e-12	-1.00974e-28	0	2.19818e-12	0	0	-1.57942e-12	0	-2.02878e-13	2.1845e-12	0	0	4.83534e-13	0	7.8289e-27	-9.67735e-16	0	0	5.78152e-12	0	0	9.67237e-13	0	0	1.41704e-12	0	0	1.18233e-12	0	0	1.18641e-11	0.706964	0.706964	0.706964	1.93636e-50	0
Fatty acid cycling	bscDayMalateSynthasePeroxisome	malate synthase, BSC	0	0	3.15818e-13	1.31632e-35	0	-2.27121e-12	-1.45375e-32	0	8.79042e-14	0	0	3.73055e-12	-7.37035e-18	0	2.58955e-12	0	0	-8.32796e-13	0	0	1.73555e-13	0	0	-1.12526e-12	0.419291	0.419291	0.419291	0	0	1.03062e-11	-1.95079e-27	0	-7.00084e-13	0	0	2.21765e-12	4.74331e-34	0	1.01009e-13	0	0	1.53045e-12	0	0	-3.83153e-24	-1.56026e-20	0
Fatty acid cycling	mcDayMalateSynthasePeroxisome	malate synthase, MC	0	0	2.20896e-13	0	0	-1.99798e-12	0	0	2.64086e-13	0	0	2.61358e-12	9.47858e-30	0	6.48679e-13	0	0	-1.16516e-12	0	0	2.53459e-13	0	0	4.94241e-13	1.76653e-36	0	-1.50421e-15	0	0	2.89076e-12	2.54121e-32	0	4.83619e-13	0	0	1.16259e-12	-3.71656e-33	0	-3.9351e-13	0	0	2.24876e-12	0.353482	0.353482	0.353482	1.34526e-51	0
ATP generation by photosynthetic light reactions and thylacoid H+ ATPase	(3*bscDayChloroplasticATPasemodchloroplast)/mcDaytxCARBONDIOXIDE	ATP/CO2, photosynthesis, BSC	1.99138	0	3.02586	1.03896	1.03896	1.03896	1.81566	1.81566	1.81566	2.2039	2.2039	2.2039	3.74316	3.05633	4.61652	1.38363	1.38363	1.38363	2.7041	2.7041	2.7041	3.02965	3.02965	3.02965	4.89011	4.89011	4.89011	3.02965	3.02965	3.02965	2.67039	0	4.41993	1.45031	1.45031	1.45031	2.7041	2.7041	2.7041	3.02969	3.02969	3.02969	5.19215	5.19215	5.19215	3.02969	3.02969
ATP generation by photosynthetic light reactions and thylacoid H+ ATPase	(3*mcDayChloroplasticATPasemodchloroplast)/mcDaytxCARBONDIOXIDE	ATP/CO2, photosynthesis, MC	1.65517	0.62069	3.64655	2.60759	2.60759	2.60759	3.26768	3.26768	3.26768	4.03237	4.03237	4.03237	1.05338	0.180022	1.74021	3.47265	3.47265	3.47265	4.86663	4.86663	4.86663	5.54322	5.54322	5.54322	8.94722	8.94722	8.94722	5.54322	5.54322	5.54322	2.41993	0.670389	5.09032	3.64001	3.64001	3.64001	4.86663	4.86663	4.86663	5.54329	5.54329	5.54329	9.49985	9.49985	9.49985	5.54329	5.54329
ATP generation by photosynthetic light reactions and thylacoid H+ ATPase	(3*bscDayChloroplasticATPasemodchloroplast + 3*mcDayChloroplasticATPasemodchloroplast)/mcDaytxCARBONDIOXIDE	ATP/CO2, photosynthesis, (BSC, MC)	3.64655	3.64655	3.64655	3.64655	3.64655	3.64655	5.08333	5.08333	5.08333	6.23627	6.23627	6.23627	4.79654	4.79654	4.79654	4.85628	4.85628	4.85628	7.57073	7.57073	7.57073	8.57288	8.57288	8.57288	13.8373	13.8373	13.8373	8.57288	8.57288	8.57288	5.09032	5.09032	5.09032	5.09032	5.09032	5.09032	7.57073	7.57073	7.57073	8.57298	8.57298	8.57298	14.692	14.692	14.692	8.57298	8.57298
NADPH generation by photosynthetic light reactions	(2*bscDayPhotosystemIImodchloroplast - bscDayMehlerReactionchloroplast + bscDaySUPEROXDISMUTRXNchloroplast)/mcDaytxCARBONDIOXIDE	NADPH/CO2, photosynthesis, BSC	1.32759	-3.747e-12	2.01724	0.692639	0.692639	0.692639	0.026813	0.026813	0.026813	0.0325464	0.0325464	0.0325464	2.49544	2.03755	3.07768	0.922419	0.922419	0.922419	0.0399332	0.0399332	0.0399332	0.0447409	0.0447409	0.0447409	0.0722155	0.0722155	0.0722155	0.0447409	0.0447409	0.0447409	1.78026	9.98526e-12	2.94662	0.966873	0.966873	0.966873	0.0399332	0.0399332	0.0399332	0.0447414	0.0447414	0.0447414	0.0766759	0.0766759	0.0766759	0.0447414	0.0447414
NADPH generation by photosynthetic light reactions	(2*mcDayPhotosystemIImodchloroplast - mcDayMehlerReactionchloroplast + mcDaySUPEROXDISMUTRXNchloroplast)/mcDaytxCARBONDIOXIDE	NADPH/CO2, photosynthesis, MC	1.10345	0.413793	2.43103	1.7384	1.7384	1.7384	1.97319	1.97319	1.97319	2.29759	2.29759	2.29759	0.702254	0.120015	1.16014	2.3151	2.3151	2.3151	2.93871	2.93871	2.93871	3.15846	3.15846	3.15846	5.09801	5.09801	5.09801	3.15846	3.15846	3.15846	1.61329	0.446926	3.39355	2.42667	2.42667	2.42667	2.93871	2.93871	2.93871	3.15849	3.15849	3.15849	5.41289	5.41289	5.41289	3.15849	3.15849
NADPH generation by photosynthetic light reactions	(2*bscDayPhotosystemIImodchloroplast - bscDayMehlerReactionchloroplast + bscDaySUPEROXDISMUTRXNchloroplast + 2*mcDayPhotosystemIImodchloroplast - mcDayMehlerReactionchloroplast + mcDaySUPEROXDISMUTRXNchloroplast)/mcDaytxCARBONDIOXIDE	NADPH/CO2, photosynthesis, (BSC, MC)	2.43103	2.43103	2.43103	2.43103	2.43103	2.43103	2	2	2	2.33014	2.33014	2.33014	3.19769	3.19769	3.19769	3.23752	3.23752	3.23752	2.97865	2.97865	2.97865	3.2032	3.2032	3.2032	5.17022	5.17022	5.17022	3.2032	3.2032	3.2032	3.39355	3.39355	3.39355	3.39355	3.39355	3.39355	2.97865	2.97865	2.97865	3.20323	3.20323	3.20323	5.48957	5.48957	5.48957	3.20323	3.20323
ATP generation by photosynthetic light reactions and thylacoid H+ ATPase; also mitochondrial oxidative phosphorylation. ATP surplus subtracted.	(3*bscDayChloroplasticATPasemodchloroplast + bscDayComplexVmodmitochondrion - bscDayATPsurplus)/mcDaytxCARBONDIOXIDE	ATP/CO2, BSC	3.08333	0.833333	3.08333	2.37512	1.60589	2.37512	1.81566	1.81566	1.81566	2.2039	2.2039	2.2039	4.47331	3.78648	4.94662	2.24653	2.24653	2.24653	2.5346	2.0079	2.5346	3.02965	2.27092	3.02965	6.06896	6.06896	6.06896	3.02965	2.66297	3.02965	4.03915	1.13332	4.41993	2.8333	2.21175	2.8333	2.7041	1.60668	2.7041	3.02969	2.30058	3.02969	6.228	5.19215	6.228	3.02969	2.69263
ATP generation by photosynthetic light reactions and thylacoid H+ ATPase; also mitochondrial oxidative phosphorylation. ATP surplus subtracted.	(3*mcDayChloroplasticATPasemodchloroplast + mcDayComplexVmodmitochondrion - mcDayATPsurplus)/mcDaytxCARBONDIOXIDE	ATP/CO2, MC	2	2	4.25	2.70821	2.70821	3.47744	3.26768	3.26768	3.26768	4.03237	4.03237	4.03237	1.05338	0.580071	1.74021	3.47265	3.47265	3.47265	2.9921	2.9921	3.51879	4.05653	4.05653	4.81526	8.94722	8.94722	8.94722	4.44858	4.44858	4.81526	2.43416	2.05338	5.33999	3.64001	3.64001	4.26156	3.76921	3.76921	4.86663	4.81418	4.81418	5.54329	10.7501	10.7501	11.7859	5.20623	5.20623
ATP generation by photosynthetic light reactions and thylacoid H+ ATPase; also mitochondrial oxidative phosphorylation. ATP surplus subtracted.	(3*bscDayChloroplasticATPasemodchloroplast + bscDayComplexVmodmitochondrion + 3*mcDayChloroplasticATPasemodchloroplast + mcDayComplexVmodmitochondrion - bscDayATPsurplus - mcDayATPsurplus)/mcDaytxCARBONDIOXIDE	ATP/CO2, (BSC, MC)	5.08333	5.08333	5.08333	5.08333	5.08333	5.08333	5.08333	5.08333	5.08333	6.23627	6.23627	6.23627	5.52669	5.52669	5.52669	5.71918	5.71918	5.71918	5.52669	5.52669	5.52669	7.08618	7.08618	7.08618	15.0162	15.0162	15.0162	7.47823	7.47823	7.47823	6.47331	6.47331	6.47331	6.47331	6.47331	6.47331	6.47331	6.47331	6.47331	7.84387	7.84387	7.84387	16.9781	16.9781	16.9781	8.23592	8.23592
NADPH generation by photosynthetic light reactions minus consumption by mitochondrial oxidative phosphorylation.	(2*bscDayPhotosystemIImodchloroplast - bscDayMehlerReactionchloroplast + bscDaySUPEROXDISMUTRXNchloroplast - 2*bscDayComplexIVmodmitochondrion)/mcDaytxCARBONDIOXIDE	NADPH/CO2, BSC	1	-0.431034	2	0.29179	0.29179	0.522559	0.026813	0.026813	0.026813	0.0325464	0.0325464	0.0325464	2.27639	1.81851	2.97865	0.663547	0.663547	0.663547	0.0399332	0.0399332	0.0399332	0.0447409	0.0447409	0.0447409	-0.51561	-0.51561	-0.51561	0.0447409	0.0447409	0.0447409	1.36963	-0.414898	2.94662	0.551976	0.551976	0.738441	0.0399332	0.0399332	0.0399332	0.0447414	0.0447414	0.0447414	-0.234079	-0.234079	0.0766759	0.0447414	0.0447414
NADPH generation by photosynthetic light reactions minus consumption by mitochondrial oxidative phosphorylation.	(2*mcDayPhotosystemIImodchloroplast - mcDayMehlerReactionchloroplast + mcDaySUPEROXDISMUTRXNchloroplast - 2*mcDayComplexIVmodmitochondrion)/mcDaytxCARBONDIOXIDE	NADPH/CO2, MC	1	-1.74032e-11	2.43103	1.70821	1.47744	1.70821	1.97319	1.97319	1.97319	2.29759	2.29759	2.29759	0.702254	-1.574e-11	1.16014	2.3151	2.3151	2.3151	2.93871	2.93871	2.93871	3.15846	3.15846	3.15846	5.09801	5.09801	5.09801	3.15846	3.15846	3.15846	1.60902	0.0320285	3.39355	2.42667	2.24021	2.42667	2.93871	2.93871	2.93871	3.15849	3.15849	3.15849	4.78778	4.47702	4.78778	3.15849	3.15849
NADPH generation by photosynthetic light reactions minus consumption by mitochondrial oxidative phosphorylation.	(2*bscDayPhotosystemIImodchloroplast - bscDayMehlerReactionchloroplast + bscDaySUPEROXDISMUTRXNchloroplast - 2*bscDayComplexIVmodmitochondrion + 2*mcDayPhotosystemIImodchloroplast - mcDayMehlerReactionchloroplast + mcDaySUPEROXDISMUTRXNchloroplast - 2*mcDayComplexIVmodmitochondrion)/mcDaytxCARBONDIOXIDE	NADPH/CO2, (BSC, MC)	2	2	2	2	2	2	2	2	2	2.33014	2.33014	2.33014	2.97865	2.97865	2.97865	2.97865	2.97865	2.97865	2.97865	2.97865	2.97865	3.2032	3.2032	3.2032	4.5824	4.5824	4.5824	3.2032	3.2032	3.2032	2.97865	2.97865	2.97865	2.97865	2.97865	2.97865	2.97865	2.97865	2.97865	3.20323	3.20323	3.20323	4.5537	4.5537	4.5537	3.20323	3.20323
NADPH consumption by mitochondrial oxidative phosphorylation.	2*bscDayComplexIVmodmitochondrion/mcDaytxCARBONDIOXIDE	H2 consumption by mitochondrial ET, BS, per CO2	0.327586	0.0172414	0.431034	0.400849	0.17008	0.400849	-2.06437e-11	-3.02317e-15	-2.63033e-11	5.30937e-12	-8.30613e-28	5.01728e-12	0.219045	0.0990306	0.219045	0.258871	0.258871	0.258871	0	7.49996e-28	-1.15578e-13	-6.27936e-12	0	-9.37737e-13	0.587826	0.587826	0.587826	3.61783e-12	0	1.30041e-12	0.410627	-1.20905e-12	0.414898	0.414898	0.228432	0.414898	-3.75989e-12	0	6.12772e-13	8.81511e-12	0	7.98741e-12	0.310755	0	0.310755	-9.18412e-14	-9.83395e-29
NADPH consumption by mitochondrial oxidative phosphorylation.	2*mcDayComplexIVmodmitochondrion/mcDaytxCARBONDIOXIDE	H2 consumption by mitochondrial ET, MC, per CO2	0.103448	3.41543e-26	0.413793	0.0301851	0.0301851	0.260954	0	0	-1.69454e-11	0	3.21047e-26	7.69675e-12	6.28417e-16	-8.34456e-28	0.120015	-3.66057e-17	-3.17846e-26	-1.50067e-11	-7.99248e-13	2.55295e-14	2.47548e-12	0	0	-3.47111e-12	-2.94227e-36	-1.27035e-23	-2.63574e-11	0	0	1.28902e-11	0.00427046	0	0.414898	2.75798e-17	2.03066e-28	0.186465	-4.97881e-17	0	2.69742e-12	0	0	1.52963e-11	0.625113	0.625113	0.935868	-3.85359e-36	0
NADPH consumption by mitochondrial oxidative phosphorylation.	(2*bscDayComplexIVmodmitochondrion + 2*mcDayComplexIVmodmitochondrion)/mcDaytxCARBONDIOXIDE	H2 consumption by mitochondrial ET, per CO2	0.431034	0.431034	0.431034	0.431034	0.431034	0.431034	-2.06437e-11	-1.53405e-12	-1.77856e-11	5.30937e-12	-4.51129e-26	5.01728e-12	0.219045	0.219045	0.219045	0.258871	0.258871	0.258871	-7.99248e-13	-7.69844e-28	-1.48482e-12	-6.27936e-12	0	-3.47111e-12	0.587826	0.587826	0.587826	3.61783e-12	0	1.30041e-12	0.414898	0.414898	0.414898	0.414898	0.414898	0.414898	-3.75994e-12	0	6.12772e-13	8.81511e-12	1.1409e-27	7.98741e-12	0.935868	0.935868	0.935868	-9.18412e-14	-9.83395e-29
	bscDayChloroplastOleateExchange + bscDayChloroplastPalmitateExchange + bscDayChloroplastStearicAcidExchange	Chloroplast FAS C flux, BSC	0	3.29693e-17	2.53937e-13	5.26527e-35	3.36506e-16	-1.02809e-11	0	1.21562e-12	-3.04897e-12	0	-3.9825e-15	7.46111e-12	0.967228	0.967228	0.967228	0.95533	0.95533	0.95533	0.854251	0.854251	0.854251	0.721867	0.721867	0.721867	1.92677	1.92677	1.92677	0.721867	0.721867	0.721867	-3.23117e-27	-1.45029e-28	9.93152e-13	0	0	5.99149e-12	-7.52322e-34	-2.80089e-30	4.42366e-12	0	0	3.0609e-12	0	0	0	-3.12052e-20	0
	mcDayChloroplastOleateExchange + mcDayChloroplastPalmitateExchange + mcDayChloroplastStearicAcidExchange	Chloroplast FAS C flux, MC	0	-4.16048e-18	2.07875e-12	0	3.35866e-15	-1.0953e-11	0	1.20757e-28	1.18948e-12	0	-1.92245e-15	6.6054e-12	-2.01948e-28	-2.6227e-16	6.30642e-12	0	6.8686e-32	-3.15884e-12	0	6.6444e-29	-6.07873e-13	0	-1.10957e-15	9.67068e-13	0	0	0	0	0	1.1563e-11	0.911406	0.911406	0.911406	0.911406	0.911406	0.911406	0.854251	0.854251	0.854251	0.721857	0.721857	0.721857	1.76724	1.76724	1.76724	0.721857	0.721857
	bscDayPalmitoylCoASynthesis + bscDayOleoylCoASynthesis + bscDayLinoleoylCoASynthesis + bscDayLinolenoylCoASynthesis	FA C flux cytosolic LACS, BSC	0	3.29693e-17	3.09625e-11	0	6.3292e-13	-3.94486e-10	0	-2.38207e-32	1.46506e-10	0	0	4.28934e-10	0.967228	0.967228	0.967228	0.95533	0.95533	0.95533	0.854251	0.854251	0.854251	0.721867	0.721867	0.721867	0.385208	0.385208	0.385208	3.60934	3.60934	3.60934	-1.93995e-11	0	-1.3289e-10	0	0	2.86423e-10	0	-4.48416e-44	-1.27245e-10	0	0	-3.89422e-11	0	2.89368e-23	3.0586e-10	0	0
	mcDayPalmitoylCoASynthesis + mcDayOleoylCoASynthesis + mcDayLinoleoylCoASynthesis + mcDayLinolenoylCoASynthesis	FA C flux cytosolic LACS, MC	0	-1.13372e-16	2.00235e-10	0	0	-4.26125e-10	0	-5.59884e-26	-1.2966e-10	0	7.05372e-25	2.90417e-10	0	-2.4981e-15	1.59384e-10	0	-4.51414e-29	-3.69248e-10	0	-9.63242e-17	-7.94874e-11	0	0	1.7618e-10	0	7.73458e-15	-9.24456e-10	0	0	9.29027e-10	0.911406	0.911406	0.911406	0.911406	0.911406	0.911406	0.854251	0.854251	0.854251	0.721857	0.721857	0.721857	0.353316	0.353316	0.353316	3.60928	3.60928
TAG synthesis by DGAT & PDAT	bscDayDGAT16c0c16c0c16c0 + bscDayDGAT16c0c16c0c18c1 + bscDayDGAT16c0c16c0c18c2 + bscDayDGAT16c0c16c0c18c3 + bscDayDGAT16c0c18c1c16c0 + bscDayDGAT16c0c18c1c18c1 + bscDayDGAT16c0c18c1c18c2 + bscDayDGAT16c0c18c1c18c3 + bscDayDGAT16c0c18c2c16c0 + bscDayDGAT16c0c18c2c18c1 + bscDayDGAT16c0c18c2c18c2 + bscDayDGAT16c0c18c2c18c3 + bscDayDGAT16c0c18c3c16c0 + bscDayDGAT16c0c18c3c18c1 + bscDayDGAT16c0c18c3c1…	TAG synthesis flux, BSC	0	0	4.79971e-12	0	5.52137e-14	-2.06573e-11	0	2.63396e-17	-1.00689e-13	0	-8.15981e-17	2.03777e-11	0.0545429	0.0545429	0.0545429	0.053872	0.053872	0.053872	0.048172	0.048172	0.048172	0.0407068	0.0407068	0.0407068	0.0217223	0.0217223	0.0217223	0.203534	0.203534	0.203534	0	-7.80428e-18	8.08225e-13	0	0	1.55564e-11	0	0	-6.08016e-12	0	-9.08645e-17	-4.11703e-12	0	0	2.84373e-11	0	0
TAG synthesis by DGAT & PDAT	mcDayDGAT16c0c16c0c16c0 + mcDayDGAT16c0c16c0c18c1 + mcDayDGAT16c0c16c0c18c2 + mcDayDGAT16c0c16c0c18c3 + mcDayDGAT16c0c18c1c16c0 + mcDayDGAT16c0c18c1c18c1 + mcDayDGAT16c0c18c1c18c2 + mcDayDGAT16c0c18c1c18c3 + mcDayDGAT16c0c18c2c16c0 + mcDayDGAT16c0c18c2c18c1 + mcDayDGAT16c0c18c2c18c2 + mcDayDGAT16c0c18c2c18c3 + mcDayDGAT16c0c18c3c16c0 + mcDayDGAT16c0c18c3c18c1 + mcDayDGAT16c0c18c3c18c2 + mcDayDGAT…	TAG synthesis flux, MC	0	5.06719e-15	1.24105e-12	0	6.05123e-16	-2.13817e-11	0	-1.03479e-17	8.38439e-14	0	-1.33466e-16	3.96926e-12	0	0	6.78265e-12	0	8.61224e-17	-1.87212e-11	0	2.29927e-16	9.78332e-12	0	0	8.38939e-12	0	-5.99225e-28	-3.65857e-11	0	0	2.78871e-11	0.0513951	0.0513951	0.0513951	0.0513951	0.0513951	0.0513951	0.048172	0.048172	0.048172	0.0407062	0.0407062	0.0407062	0.0199238	0.0199238	0.0199238	0.203531	0.203531
Supply of ATP and NADPH by photosynthetic light reactions with adjustments that account for activity of oxidative phosphorylation (OP) in mitochondria.	(3*bscDayChloroplasticATPasemodchloroplast + bscDayComplexVmodmitochondrion)/(2*bscDayPhotosystemIImodchloroplast - bscDayMehlerReactionchloroplast - bscDaySUPEROXDISMUTRXNchloroplast - 2*bscDayComplexIVmodmitochondrion)	ATP/NADPH (BS, supply)	3.08333	'n/a'	'n/a'	8.13985	'n/a'	'n/a'	67.7155	'n/a'	'n/a'	67.7155	'n/a'	'n/a'	1.96509	'n/a'	'n/a'	3.38564	'n/a'	'n/a'	67.7155	'n/a'	'n/a'	67.7155	'n/a'	'n/a'	-11.7704	'n/a'	'n/a'	67.7155	'n/a'	'n/a'	2.94907	'n/a'	'n/a'	5.13302	'n/a'	'n/a'	67.7155	'n/a'	'n/a'	67.7155	'n/a'	'n/a'	-26.6064	'n/a'	'n/a'	67.7155	'n/a'
Supply of ATP and NADPH by photosynthetic light reactions with adjustments that account for activity of oxidative phosphorylation (OP) in mitochondria.	(3*mcDayChloroplasticATPasemodchloroplast + mcDayComplexVmodmitochondrion)/(2*mcDayPhotosystemIImodchloroplast - mcDayMehlerReactionchloroplast - mcDaySUPEROXDISMUTRXNchloroplast - 2*mcDayComplexIVmodmitochondrion)	ATP/NADPH (M, supply)	2	'n/a'	'n/a'	1.58541	'n/a'	'n/a'	1.65604	'n/a'	'n/a'	1.75504	'n/a'	'n/a'	1.5	'n/a'	'n/a'	1.5	'n/a'	'n/a'	1.65604	'n/a'	'n/a'	1.75504	'n/a'	'n/a'	1.75504	'n/a'	'n/a'	1.75504	'n/a'	'n/a'	1.51283	'n/a'	'n/a'	1.5	'n/a'	'n/a'	1.65604	'n/a'	'n/a'	1.75504	'n/a'	'n/a'	2.24532	'n/a'	'n/a'	1.75504	'n/a'
Supply of ATP and NADPH by photosynthetic light reactions with adjustments that account for activity of oxidative phosphorylation (OP) in mitochondria.	(3*bscDayChloroplasticATPasemodchloroplast + 3*mcDayChloroplasticATPasemodchloroplast + bscDayComplexVmodmitochondrion + mcDayComplexVmodmitochondrion)/(2*bscDayPhotosystemIImodchloroplast + 2*mcDayPhotosystemIImodchloroplast - bscDayMehlerReactionchloroplast - mcDayMehlerReactionchloroplast - bscDaySUPEROXDISMUTRXNchloroplast - mcDaySUPEROXDISMUTRXNchloroplast - 2*bscDayComplexIVmodmitochondrion…	ATP/NADPH (BS, M, supply)	2.54167	'n/a'	'n/a'	2.54167	'n/a'	'n/a'	2.54167	'n/a'	'n/a'	2.67635	'n/a'	'n/a'	1.85544	'n/a'	'n/a'	1.92006	'n/a'	'n/a'	2.54167	'n/a'	'n/a'	2.67635	'n/a'	'n/a'	3.27693	'n/a'	'n/a'	2.67635	'n/a'	'n/a'	2.17324	'n/a'	'n/a'	2.17324	'n/a'	'n/a'	2.54167	'n/a'	'n/a'	2.67635	'n/a'	'n/a'	3.72841	'n/a'	'n/a'	2.67635	'n/a'
ATP and NADPH by photosynthetic light reactions.	(3*bscDayChloroplasticATPasemodchloroplast)/(2*bscDayPhotosystemIImodchloroplast - bscDayMehlerReactionchloroplast - bscDaySUPEROXDISMUTRXNchloroplast)	ATP/NADPH (BS, PS)	1.5	'n/a'	'n/a'	1.5	'n/a'	'n/a'	67.7155	'n/a'	'n/a'	67.7155	'n/a'	'n/a'	1.5	'n/a'	'n/a'	1.5	'n/a'	'n/a'	67.7155	'n/a'	'n/a'	67.7155	'n/a'	'n/a'	67.7155	'n/a'	'n/a'	67.7155	'n/a'	'n/a'	1.5	'n/a'	'n/a'	1.5	'n/a'	'n/a'	67.7155	'n/a'	'n/a'	67.7155	'n/a'	'n/a'	67.7155	'n/a'	'n/a'	67.7155	'n/a'
ATP and NADPH by photosynthetic light reactions.	(3*mcDayChloroplasticATPasemodchloroplast)/(2*mcDayPhotosystemIImodchloroplast - mcDayMehlerReactionchloroplast - mcDaySUPEROXDISMUTRXNchloroplast)	ATP/NADPH (M, PS)	1.5	'n/a'	'n/a'	1.5	'n/a'	'n/a'	1.65604	'n/a'	'n/a'	1.75504	'n/a'	'n/a'	1.5	'n/a'	'n/a'	1.5	'n/a'	'n/a'	1.65604	'n/a'	'n/a'	1.75504	'n/a'	'n/a'	1.75504	'n/a'	'n/a'	1.75504	'n/a'	'n/a'	1.5	'n/a'	'n/a'	1.5	'n/a'	'n/a'	1.65604	'n/a'	'n/a'	1.75504	'n/a'	'n/a'	1.75504	'n/a'	'n/a'	1.75504	'n/a'
ATP and NADPH by photosynthetic light reactions.	(3*bscDayChloroplasticATPasemodchloroplast + 3*mcDayChloroplasticATPasemodchloroplast)/(2*bscDayPhotosystemIImodchloroplast + 2*mcDayPhotosystemIImodchloroplast - bscDayMehlerReactionchloroplast - mcDayMehlerReactionchloroplast - bscDaySUPEROXDISMUTRXNchloroplast - mcDaySUPEROXDISMUTRXNchloroplast)	ATP/NADPH (BS, M, PS)	1.5	'n/a'	'n/a'	1.5	'n/a'	'n/a'	2.54167	'n/a'	'n/a'	2.67635	'n/a'	'n/a'	1.5	'n/a'	'n/a'	1.5	'n/a'	'n/a'	2.54167	'n/a'	'n/a'	2.67635	'n/a'	'n/a'	2.67635	'n/a'	'n/a'	2.67635	'n/a'	'n/a'	1.5	'n/a'	'n/a'	1.5	'n/a'	'n/a'	2.54167	'n/a'	'n/a'	2.67635	'n/a'	'n/a'	2.67635	'n/a'	'n/a'	2.67635	'n/a'
ATP surplus	bscDayATPsurplus/mcDaytxCARBONDIOXIDE	ATP surplus (BS, per CO2)	0	'n/a'	'n/a'	0	'n/a'	'n/a'	0	'n/a'	'n/a'	0	'n/a'	'n/a'	0	'n/a'	'n/a'	0	'n/a'	'n/a'	0.169503	'n/a'	'n/a'	0	'n/a'	'n/a'	0	'n/a'	'n/a'	0	'n/a'	'n/a'	0	'n/a'	'n/a'	0	'n/a'	'n/a'	0	'n/a'	'n/a'	0	'n/a'	'n/a'	0	'n/a'	'n/a'	0	'n/a'
ATP surplus	mcDayATPsurplus/mcDaytxCARBONDIOXIDE	ATP surplus (M, per CO2)	0	'n/a'	'n/a'	0	'n/a'	'n/a'	0	'n/a'	'n/a'	2.48366e-09	'n/a'	'n/a'	0	'n/a'	'n/a'	0	'n/a'	'n/a'	1.87454	'n/a'	'n/a'	1.48669	'n/a'	'n/a'	0	'n/a'	'n/a'	1.09464	'n/a'	'n/a'	0	'n/a'	'n/a'	0	'n/a'	'n/a'	1.09742	'n/a'	'n/a'	0.729105	'n/a'	'n/a'	0	'n/a'	'n/a'	0.337058	'n/a'
ATP surplus	(bscDayATPsurplus + mcDayATPsurplus)/mcDaytxCARBONDIOXIDE	ATP surplus (per CO2)	0	'n/a'	'n/a'	0	'n/a'	'n/a'	0	'n/a'	'n/a'	2.48366e-09	'n/a'	'n/a'	0	'n/a'	'n/a'	0	'n/a'	'n/a'	2.04404	'n/a'	'n/a'	1.48669	'n/a'	'n/a'	0	'n/a'	'n/a'	1.09464	'n/a'	'n/a'	0	'n/a'	'n/a'	0	'n/a'	'n/a'	1.09742	'n/a'	'n/a'	0.729105	'n/a'	'n/a'	0	'n/a'	'n/a'	0.337058	'n/a'
NADPH surplus	bscDayNADPHsurplus/mcDaytxCARBONDIOXIDE	NADPH surplus (BS, per CO2)	0	'n/a'	'n/a'	0	'n/a'	'n/a'	0	'n/a'	'n/a'	0	'n/a'	'n/a'	0	'n/a'	'n/a'	0	'n/a'	'n/a'	0	'n/a'	'n/a'	0	'n/a'	'n/a'	0	'n/a'	'n/a'	0	'n/a'	'n/a'	0	'n/a'	'n/a'	0	'n/a'	'n/a'	0	'n/a'	'n/a'	0	'n/a'	'n/a'	0	'n/a'	'n/a'	0	'n/a'
NADPH surplus	mcDayNADPHsurplus/mcDaytxCARBONDIOXIDE	NADPH surplus (M, per CO2)	0	'n/a'	'n/a'	0	'n/a'	'n/a'	0	'n/a'	'n/a'	0	'n/a'	'n/a'	0	'n/a'	'n/a'	0	'n/a'	'n/a'	0	'n/a'	'n/a'	0	'n/a'	'n/a'	0	'n/a'	'n/a'	0	'n/a'	'n/a'	0	'n/a'	'n/a'	0	'n/a'	'n/a'	0	'n/a'	'n/a'	0	'n/a'	'n/a'	0	'n/a'	'n/a'	0	'n/a'
NADPH surplus	(bscDayNADPHsurplus + mcDayNADPHsurplus)/mcDaytxCARBONDIOXIDE	NADPH surplus (per CO2)	0	'n/a'	'n/a'	0	'n/a'	'n/a'	0	'n/a'	'n/a'	0	'n/a'	'n/a'	0	'n/a'	'n/a'	0	'n/a'	'n/a'	0	'n/a'	'n/a'	0	'n/a'	'n/a'	0	'n/a'	'n/a'	0	'n/a'	'n/a'	0	'n/a'	'n/a'	0	'n/a'	'n/a'	0	'n/a'	'n/a'	0	'n/a'	'n/a'	0	'n/a'	'n/a'	0	'n/a'
Fraction of absorbed light that drives Linear Electron Transport in M-cells (fLETM), re-calculated from fluxes.	9.25*bscDayPhotosystemIImodchloroplast/(5*bscDayPhotosystemIImodchloroplast+1.0625*bscDayPhotosystemImodchloroplast)	fLET,BS	1	'n/a'	'n/a'	1	'n/a'	'n/a'	0.0318235	'n/a'	'n/a'	0.0318235	'n/a'	'n/a'	1	'n/a'	'n/a'	1	'n/a'	'n/a'	0.0318235	'n/a'	'n/a'	0.0318235	'n/a'	'n/a'	0.0318235	'n/a'	'n/a'	0.0318235	'n/a'	'n/a'	1	'n/a'	'n/a'	1	'n/a'	'n/a'	0.0318235	'n/a'	'n/a'	0.0318235	'n/a'	'n/a'	0.0318235	'n/a'	'n/a'	0.0318235	'n/a'
Fraction of absorbed light that drives Linear Electron Transport in BS-cells (fLETM), re-calculated from fluxes.	9.25*mcDayPhotosystemIImodchloroplast/(5*mcDayPhotosystemIImodchloroplast+1.0625*mcDayPhotosystemImodchloroplast)	fLET,M	1	'n/a'	'n/a'	1	'n/a'	'n/a'	0.933102	'n/a'	'n/a'	0.89511	'n/a'	'n/a'	1	'n/a'	'n/a'	1	'n/a'	'n/a'	0.933102	'n/a'	'n/a'	0.89511	'n/a'	'n/a'	0.89511	'n/a'	'n/a'	0.89511	'n/a'	'n/a'	1	'n/a'	'n/a'	1	'n/a'	'n/a'	0.933102	'n/a'	'n/a'	0.89511	'n/a'	'n/a'	0.89511	'n/a'	'n/a'	0.89511	'n/a'
absorbed quantum yield for CO2 uptake	mcDaytxCARBONDIOXIDE/(bscDaytxLight + mcDaytxLight)	Phi CO2	0.08894	'n/a'	'n/a'	0.08894	'n/a'	'n/a'	0.073115	'n/a'	'n/a'	0.060235	'n/a'	'n/a'	0.0676163	'n/a'	'n/a'	0.0667845	'n/a'	'n/a'	0.0490928	'n/a'	'n/a'	0.0438175	'n/a'	'n/a'	0.027147	'n/a'	'n/a'	0.0438175	'n/a'	'n/a'	0.063714	'n/a'	'n/a'	0.063714	'n/a'	'n/a'	0.0490928	'n/a'	'n/a'	0.0438169	'n/a'	'n/a'	0.0255678	'n/a'	'n/a'	0.0438169	'n/a'
[truncated: 1 more columns]

## Sheet: Table S8
Supplementary Table 8. Reactions inactivated based on differential gene expression data. Expression of Sorghum bicolor genes in mesophyll or bundle sheath cells was measured by Döring et al. (2016). We used this data to constrain 9 model reactions to be inactive if all of the associated genes were found to be preferentially expressed in the alternative cell and the reaction wasn’t required for bi…
Gene(s)	Cell	Reaction Abbreviation	Deactivated?	Formula
Sobic.009G068200	bundle sheath	bscGUANPRIBOSYLTRANRXN	Yes	PrPP + Guanine -> PPi + GMP
Sobic.003G433750	bundle sheath	bscPHOSPHASERDECARBRXN	Yes	Proton + L1PhosphatidylSerine -> L1PhosphatidylEthanolamine + CO2
& Sobic.003G433750
Sobic.009G132900	bundle sheath	bscPYRUVATEORTHOPHOSPHATE	Yes	Phosphate + ATP + Pyruvate <=> Phosphoenolpyruvate + Proton + AMP + PPi
& Sobic.009G132900		DIKINASERXNchloroplast
Sobic.010G023700	mesophyll	mc1TRANSKETORXNchloroplast	No	DSedoheptulose7P + GAP <=> Ribose5P + Xylulose5Phosphate
Sobic.010G023700	mesophyll	mc2TRANSKETORXNchloroplast	No	Erythrose4P + Xylulose5Phosphate <=> Fructose6P + GAP
Sobic.002G279700	mesophyll	mc3DehydroquinateSynthase	No	3DeoxyDArabinoHeptulosonate7P -> Dehydroquinate + Phosphate
& Sobic.002G279700		RxnChloroplast
Sobic.002G244500	mesophyll	mcATPPHOSPHORIBOSYLTRANS	No	PrPP + ATP -> PhosphoribosylATP + PPi
Sobic.002G314300	mesophyll	mcEC1849Chloroplast	Yes	Aps + 2 Glutathione -> OxidizedGlutathione + 2 Proton + SO3 + AMP
& Sobic.002G314300
Sobic.001G491000	mesophyll	mcRIBULP3EPIMRXNchloroplast	Yes	Ribulose5P <=> Xylulose5Phosphate
& Sobic.001G491000
Sobic.001G116100	mesophyll	mcThrDehydRXNChloroplast	No	Thr -> Ammonia + Proton + 2Oxobutanoate
& Sobic.001G116100
Sobic.003G193700	mesophyll	mcEC63416	Yes	Water + Ammonia + 2 ATP + CO2 -> CarbamoylP + 2 Proton + 2 ADP + Phosphate
& Sobic.003G193700
Sobic.004G054500	mesophyll	mcOHMETHYLBILANESYNRXN	Yes	Water + 4 Porphobilinogen -> 4 Ammonia + 4 Proton + Hydroxymethylbilane
& Sobic.004G054500
Sobic.003G132100	mesophyll	mcRXN13191	Yes	3 Oxygen + 3 Proton + 3 NADPH
& Sobic.003G132100				+ MgProtoporphyrinMonomethylEster <=> 5 Water + 3 NADP
				+ DivinylProtochlorophyllideA '+ DivinylProtochlorophyllideA
Sobic.008G097000	mesophyll	mcRXN1884	Yes	LGalactose + NAD -> LGalactono14Lactone + Proton + NADH
Sobic.004G266400	mesophyll	mcRXN3522	Yes	2 Monodehydroascorbate + NADPH -> 2 Ascorbate + Proton + NADP
Sobic.001G116500	mesophyll	mcPHOSPHOGLUCMUTRXN	Yes	Glc1P <=> AlphaGlc6P
& Sobic.001G116500
Sobic.002G042400	mesophyll	mcRXN969peroxisome	Yes	Glycollate + Oxygen -> Glyox + HydrogenPeroxide

## Sheet: Table S9
Supplementary Table 9. Photo-assimilation of CO2 into sucrose or TAG using the single-cell model iTJC1414 when photorespiration is active (carboxylation:oxygenation = 3:1). Flux scenarios are in dependence of a fixed value for a generic ATP consuming reaction “ATPsurplus”. The optimum flux solution space was predicted by Flux Variability Analysis for maximal product flux, given limiting light and…
	Scenario (product)
	4 (sucrose)	5 (TAG)	6 (TAG)
ATPsurplus flux constraint [mol / mol CO2]	0	0	0.173
Quantum yield, mass balance
Quantum yield [mol CO2 / mol photon absorbed]	0.066	0.046	0.046
CO2 consumption [mol / mol product]	12	56.2	56.2
H2O consumption [mol / mol product]	11	47.4	47.4
O2 production [mol / mol product]	12	76.9	76.9
Flux variability type characterization of optimum flux space
Essential reactions (all possible flux values ≠ 0)1	69	100	106
Non-essential reactions (flux values can be = 0)2	37	599	171
Reactions never used3	913	320	742
1 '+', '-', '[+ +]', '[- -]', '[+ +1000]', '[-1000 -]'
2 '[- +]', '[- +1000]', '[- 0]', '[0 +]', '[0 +1000]', '[-1000 +]', '[-1000 +1000]', '[-1000 0]'
3 '0'

## Sheet: Table S10
Supplementary Table 10. Photo-assimilation of CO2 into sucrose or TAG using the single-cell model iTJC1414. Reaction "ATPsurplus" was added to aggregate ATP consuming activities across the network. Flux variability type categorization with numerical tolerance 1E-6. See code file "iTJC1414_FluxVariability.m" (Supplementary File 1).
Scenario 1 (sucrose synthesis)						Scenario 2 (TAG synthesis)						Scenario 3 (TAG synthesis, Flux Variability Analysis after maximization of "ATPsurplus")						Scenario 4 (sucrose synthesis, photorespiration, carboxylation:oxygenation = 3:1)						Scenario 5 (TAG synthesis, photorespiration, carboxylation:oxygenation = 3:1)						Scenario 6 (TAG synthesis, photorespiration, carboxylation:oxygenation = 3:1, Flux Variability Analysis after maximization of "ATPsurplus")
Reactions	Optimal_maxsucrose	Optimal_oneNorm	Vmin_maxSucrose	Vmax_maxSucrose	Variability type	Reactions	Optimal_maxsucrose	Optimal_oneNorm	Vmin_maxSucrose	Vmax_maxSucrose	Variability type	Reactions	Optimal_maxsucrose	Optimal_oneNorm	Vmin_maxSucrose	Vmax_maxSucrose	Variability type	Reactions	Optimal_maxsucrose	Optimal_oneNorm	Vmin_maxSucrose	Vmax_maxSucrose	Variability type	Reactions	Optimal_maxsucrose	Optimal_oneNorm	Vmin_maxSucrose	Vmax_maxSucrose	Variability type	Reactions	Optimal_maxsucrose	Optimal_oneNorm	Vmin_maxSucrose	Vmax_maxSucrose	Variability type
rxn16c0c16c0c16c0TriacylglycerolSink	0	0	0	0	0	rxn16c0c16c0c16c0TriacylglycerolSink	0	0	0	0.0803365	[0 +]	rxn16c0c16c0c16c0TriacylglycerolSink	0	0	0	0.0803362	[0 +]	rxn16c0c16c0c16c0TriacylglycerolSink	0	0	0	1.85739e-14	0	rxn16c0c16c0c16c0TriacylglycerolSink	0	0	0	0.0814376	[0 +]	rxn16c0c16c0c16c0TriacylglycerolSink	0	0	0	0.081437	[0 +]
rxn16c0c16c0c18c1TriacylglycerolSink	0	0	0	0	0	rxn16c0c16c0c18c1TriacylglycerolSink	0	0	0	0.120505	[0 +]	rxn16c0c16c0c18c1TriacylglycerolSink	0	0	0	0.120504	[0 +]	rxn16c0c16c0c18c1TriacylglycerolSink	0	0	0	2.15267e-14	0	rxn16c0c16c0c18c1TriacylglycerolSink	0	0	0	0.122156	[0 +]	rxn16c0c16c0c18c1TriacylglycerolSink	0	0	0	0.122156	[0 +]
rxn16c0c16c0c18c2TriacylglycerolSink	0	0	0	0	0	rxn16c0c16c0c18c2TriacylglycerolSink	-1.25714e-31	0	0	0.120505	[0 +]	rxn16c0c16c0c18c2TriacylglycerolSink	0	-2.7462e-32	0	0.120504	[0 +]	rxn16c0c16c0c18c2TriacylglycerolSink	0	0	0	2.99549e-14	0	rxn16c0c16c0c18c2TriacylglycerolSink	0.122156	0	0	0.122156	[0 +]	rxn16c0c16c0c18c2TriacylglycerolSink	0	2.93639e-32	0	0.122156	[0 +]
rxn16c0c16c0c18c3TriacylglycerolSink	0	0	0	0	0	rxn16c0c16c0c18c3TriacylglycerolSink	0	0	0	0.120505	[0 +]	rxn16c0c16c0c18c3TriacylglycerolSink	0	0	0	0.120504	[0 +]	rxn16c0c16c0c18c3TriacylglycerolSink	0	0	0	3.1348e-14	0	rxn16c0c16c0c18c3TriacylglycerolSink	0	0	0	0.122156	[0 +]	rxn16c0c16c0c18c3TriacylglycerolSink	0.0305389	0	0	0.122156	[0 +]
rxn16c0c18c1c18c1TriacylglycerolSink	0	0	0	0	0	rxn16c0c18c1c18c1TriacylglycerolSink	0	-1.21733e-32	0	0.0602526	[0 +]	rxn16c0c18c1c18c1TriacylglycerolSink	0	0	0	0.0602521	[0 +]	rxn16c0c18c1c18c1TriacylglycerolSink	0	0	0	9.71579e-15	0	rxn16c0c18c1c18c1TriacylglycerolSink	0	0	0	0.0610786	[0 +]	rxn16c0c18c1c18c1TriacylglycerolSink	0	0	0	0.0610778	[0 +]
rxn16c0c18c1c18c2TriacylglycerolSink	0	0	0	0	0	rxn16c0c18c1c18c2TriacylglycerolSink	0	-7.17951e-16	0	0.120505	[0 +]	rxn16c0c18c1c18c2TriacylglycerolSink	0	0	0	0.120504	[0 +]	rxn16c0c18c1c18c2TriacylglycerolSink	0	0	0	1.96434e-14	0	rxn16c0c18c1c18c2TriacylglycerolSink	0	0	0	0.122157	[0 +]	rxn16c0c18c1c18c2TriacylglycerolSink	0	5.5957e-33	0	0.122156	[0 +]
rxn16c0c18c1c18c3TriacylglycerolSink	0	0	0	0	0	rxn16c0c18c1c18c3TriacylglycerolSink	0	0	0	0.120505	[0 +]	rxn16c0c18c1c18c3TriacylglycerolSink	8.99707e-26	0	0	0.120504	[0 +]	rxn16c0c18c1c18c3TriacylglycerolSink	0	0	0	3.3548e-14	0	rxn16c0c18c1c18c3TriacylglycerolSink	0	0	0	0.122157	[0 +]	rxn16c0c18c1c18c3TriacylglycerolSink	0	-9.9808e-33	0	0.122156	[0 +]
rxn16c0c18c2c18c2TriacylglycerolSink	0	0	0	0	0	rxn16c0c18c2c18c2TriacylglycerolSink	0.180756	-7.41145e-33	0	0.180757	[0 +]	rxn16c0c18c2c18c2TriacylglycerolSink	0	0.120504	0	0.180756	[0 +]	rxn16c0c18c2c18c2TriacylglycerolSink	0	0	0	7.3598e-15	0	rxn16c0c18c2c18c2TriacylglycerolSink	0	0.0610778	0	0.183234	[0 +]	rxn16c0c18c2c18c2TriacylglycerolSink	0.183233	0.0610778	0	0.183233	[0 +]
rxn16c0c18c2c18c3TriacylglycerolSink	0	0	0	0	0	rxn16c0c18c2c18c3TriacylglycerolSink	7.64723e-30	0	0	0.24101	[0 +]	rxn16c0c18c2c18c3TriacylglycerolSink	0	1.55011e-32	0	0.241009	[0 +]	rxn16c0c18c2c18c3TriacylglycerolSink	0	0	0	3.39149e-14	0	rxn16c0c18c2c18c3TriacylglycerolSink	-7.54389e-31	0	0	0.244313	[0 +]	rxn16c0c18c2c18c3TriacylglycerolSink	0	0	0	0.244311	[0 +]
rxn16c0c18c3c18c3TriacylglycerolSink	0	0	0	0	0	rxn16c0c18c3c18c3TriacylglycerolSink	0.0602521	0.241009	0	0.24101	[0 +]	rxn16c0c18c3c18c3TriacylglycerolSink	0.241009	0.120504	0	0.241009	[0 +]	rxn16c0c18c3c18c3TriacylglycerolSink	0	0	0	2.53838e-14	0	rxn16c0c18c3c18c3TriacylglycerolSink	0	0.183233	0	0.244313	[0 +]	rxn16c0c18c3c18c3TriacylglycerolSink	0	0.183233	0	0.244311	[0 +]
rxn16c0FFAsink	0	0	0	0	0	rxn16c0FFAsink	0	0	0	1.10825e-06	[0 +]	rxn16c0FFAsink	0	0	0	3.80529e-14	0	rxn16c0FFAsink	0	0	0	1.2091e-13	0	rxn16c0FFAsink	0	0	0	2.06761e-06	[0 +]	rxn16c0FFAsink	0	0	0	2.96152e-14	0
rxn18c1c18c1c18c1TriacylglycerolSink	0	0	0	0	0	rxn18c1c18c1c18c1TriacylglycerolSink	0	0	0	0.0401684	[0 +]	rxn18c1c18c1c18c1TriacylglycerolSink	0	0	0	0.0401681	[0 +]	rxn18c1c18c1c18c1TriacylglycerolSink	0	0	0	2.24766e-14	0	rxn18c1c18c1c18c1TriacylglycerolSink	0	0	0	0.0407191	[0 +]	rxn18c1c18c1c18c1TriacylglycerolSink	0	0	0	0.0407185	[0 +]
rxn18c1c18c1c18c2TriacylglycerolSink	0	0	0	0	0	rxn18c1c18c1c18c2TriacylglycerolSink	0	0	0	0.0602526	[0 +]	rxn18c1c18c1c18c2TriacylglycerolSink	6.38279e-25	0	0	0.0602521	[0 +]	rxn18c1c18c1c18c2TriacylglycerolSink	0	0	0	3.13828e-14	0	rxn18c1c18c1c18c2TriacylglycerolSink	0	0	0	0.0610786	[0 +]	rxn18c1c18c1c18c2TriacylglycerolSink	0	0	0	0.0610778	[0 +]
rxn18c1c18c1c18c3TriacylglycerolSink	0	0	0	0	0	rxn18c1c18c1c18c3TriacylglycerolSink	0	3.78578e-33	0	0.0602526	[0 +]	rxn18c1c18c1c18c3TriacylglycerolSink	0.0602521	0	0	0.0602521	[0 +]	rxn18c1c18c1c18c3TriacylglycerolSink	0	0	0	1.48409e-14	0	rxn18c1c18c1c18c3TriacylglycerolSink	0	0	0	0.0610786	[0 +]	rxn18c1c18c1c18c3TriacylglycerolSink	0	5.0477e-33	0	0.0610778	[0 +]
rxn18c1c18c2c18c2TriacylglycerolSink	0	0	0	0	0	rxn18c1c18c2c18c2TriacylglycerolSink	0	0.0602521	0	0.120505	[0 +]	rxn18c1c18c2c18c2TriacylglycerolSink	0	0	0	0.120504	[0 +]	rxn18c1c18c2c18c2TriacylglycerolSink	0	0	0	4.7274e-14	0	rxn18c1c18c2c18c2TriacylglycerolSink	0	0.122156	0	0.122157	[0 +]	rxn18c1c18c2c18c2TriacylglycerolSink	0	0	0	0.122156	[0 +]
rxn18c1c18c2c18c3TriacylglycerolSink	0	0	0	0	0	rxn18c1c18c2c18c3TriacylglycerolSink	0	0	0	0.120505	[0 +]	rxn18c1c18c2c18c3TriacylglycerolSink	0	0.120504	0	0.120504	[0 +]	rxn18c1c18c2c18c3TriacylglycerolSink	0	0	0	2.67205e-14	0	rxn18c1c18c2c18c3TriacylglycerolSink	0	0	0	0.122157	[0 +]	rxn18c1c18c2c18c3TriacylglycerolSink	0	-1.03028e-32	0	0.122156	[0 +]
rxn18c1c18c3c18c3TriacylglycerolSink	0	0	0	0	0	rxn18c1c18c3c18c3TriacylglycerolSink	0.120504	0.0602521	0	0.120505	[0 +]	rxn18c1c18c3c18c3TriacylglycerolSink	-2.12022e-26	9.67062e-33	0	0.120504	[0 +]	rxn18c1c18c3c18c3TriacylglycerolSink	0	0	0	2.94749e-14	0	rxn18c1c18c3c18c3TriacylglycerolSink	0.122156	0	0	0.122157	[0 +]	rxn18c1c18c3c18c3TriacylglycerolSink	0.122156	0.122156	0	0.122156	[0 +]
rxn18c1FFAsink	0	0	0	0	0	rxn18c1FFAsink	0	0	0	9.68052e-07	0	rxn18c1FFAsink	0	0	0	7.46625e-15	0	rxn18c1FFAsink	0	0	0	4.02229e-14	0	rxn18c1FFAsink	0	0	0	1.82117e-06	[0 +]	rxn18c1FFAsink	0	0	0	7.61891e-15	0
rxn18c2c18c2c18c2TriacylglycerolSink	0	0	0	0	0	rxn18c2c18c2c18c2TriacylglycerolSink	0	0	0	0.120505	[0 +]	rxn18c2c18c2c18c2TriacylglycerolSink	0	0	0	0.120504	[0 +]	rxn18c2c18c2c18c2TriacylglycerolSink	0	0	0	0	0	rxn18c2c18c2c18c2TriacylglycerolSink	0	0	0	0.122156	[0 +]	rxn18c2c18c2c18c2TriacylglycerolSink	0	0	0	0.122156	[0 +]
rxn18c2c18c2c18c3TriacylglycerolSink	0	0	0	0	0	rxn18c2c18c2c18c3TriacylglycerolSink	-5.05658e-30	-2.50822e-33	0	0.180757	[0 +]	rxn18c2c18c2c18c3TriacylglycerolSink	0.180756	1.00329e-32	0	0.180756	[0 +]	rxn18c2c18c2c18c3TriacylglycerolSink	0	0	0	3.94014e-14	0	rxn18c2c18c2c18c3TriacylglycerolSink	0	0	0	0.183234	[0 +]	rxn18c2c18c2c18c3TriacylglycerolSink	0	0	0	0.183233	[0 +]
rxn18c2c18c3c18c3TriacylglycerolSink	0	0	0	0	0	rxn18c2c18c3c18c3TriacylglycerolSink	0	0.241009	0	0.361514	[0 +]	rxn18c2c18c3c18c3TriacylglycerolSink	0	0	0	0.361513	[0 +]	rxn18c2c18c3c18c3TriacylglycerolSink	0	0	0	2.32921e-14	0	rxn18c2c18c3c18c3TriacylglycerolSink	0.244311	0	0	0.366468	[0 +]	rxn18c2c18c3c18c3TriacylglycerolSink	0	0.244311	0	0.366467	[0 +]
rxn18c2FFAsink	0	0	0	0	0	rxn18c2FFAsink	0	0	0	9.50867e-07	0	rxn18c2FFAsink	0	0	0	3.73035e-14	0	rxn18c2FFAsink	0	0	0	0	0	rxn18c2FFAsink	0	0	0	1.80092e-06	[0 +]	rxn18c2FFAsink	0	0	0	3.16969e-14	0
rxn18c3c18c3c18c3TriacylglycerolSink	0	0	0	0	0	rxn18c3c18c3c18c3TriacylglycerolSink	0.241009	0	0	0.361513	[0 +]	rxn18c3c18c3c18c3TriacylglycerolSink	0.120504	0.241009	0	0.361513	[0 +]	rxn18c3c18c3c18c3TriacylglycerolSink	0	0	0	5.30279e-14	0	rxn18c3c18c3c18c3TriacylglycerolSink	0.122156	0.244311	0	0.366467	[0 +]	rxn18c3c18c3c18c3TriacylglycerolSink	0.27485	0	0	0.366467	[0 +]
rxn18c3FFAsink	0	0	0	0	0	rxn18c3FFAsink	0	0	0	9.34282e-07	0	rxn18c3FFAsink	0	0	0	1.73195e-14	0	rxn18c3FFAsink	0	0	0	1.59084e-13	0	rxn18c3FFAsink	0	0	0	1.78112e-06	[0 +]	rxn18c3FFAsink	0	0	0	0	0
rxn1TRANSKETORXNchloroplast	16.6667	16.6667	16.6667	16.6667	+	rxn1TRANSKETORXNchloroplast	16.6296	16.6296	16.6296	16.6296	[+ +]	rxn1TRANSKETORXNchloroplast	16.6296	16.6296	16.6296	16.6296	+	rxn1TRANSKETORXNchloroplast	26.6667	26.6667	26.6667	26.6667	+	rxn1TRANSKETORXNchloroplast	26.9719	26.9719	26.9719	26.972	[+ +]	rxn1TRANSKETORXNchloroplast	26.9719	26.9719	26.9719	26.9719	+
rxn2IsopropylmalateSynRXNChloroplast	8.44339e-26	0	0	0	0	rxn2IsopropylmalateSynRXNChloroplast	0	5.44694e-15	0	2.81924e-06	[0 +]	rxn2IsopropylmalateSynRXNChloroplast	0	0	0	2.03239e-13	0	rxn2IsopropylmalateSynRXNChloroplast	0	0	0	1.66001e-13	0	rxn2IsopropylmalateSynRXNChloroplast	0	0	0	5.43499e-06	[0 +]	rxn2IsopropylmalateSynRXNChloroplast	0	0	0	9.5412e-14	0
rxn2OXOGLUTARATEDEHRXNmitochondrion	0	1.38766e-16	0	0	0	rxn2OXOGLUTARATEDEHRXNmitochondrion	1.03247e-13	-3.34832e-15	0	5.35655e-05	[0 +]	rxn2OXOGLUTARATEDEHRXNmitochondrion	-2.51046e-13	0	0	0	0	rxn2OXOGLUTARATEDEHRXNmitochondrion	0	-3.92969e-15	0	0	0	rxn2OXOGLUTARATEDEHRXNmitochondrion	-1.09521e-13	0	0	3.52093e-05	[0 +]	rxn2OXOGLUTARATEDEHRXNmitochondrion	-1.07133e-13	-9.51752e-15	0	0	0
rxn2PGADEHYDRATRXN	-100	-5.82769e-28	-998.707	967.098	[- +]	rxn2PGADEHYDRATRXN	-83.7505	0	-991.896	984.636	[- +]	rxn2PGADEHYDRATRXN	-83.7505	3.43437	-983.973	984.636	[- +]	rxn2PGADEHYDRATRXN	-995.603	3.47997e-31	-995.603	948.132	[- +]	rxn2PGADEHYDRATRXN	-983.753	6.4376	-989.703	964.197	[- +]	rxn2PGADEHYDRATRXN	-135.47	7.78131	-983.753	964.196	[- +]
rxn2PGADEHYDRATRXNChloroplast	100	2.86048e-16	-967.098	998.707	[- +]	rxn2PGADEHYDRATRXNChloroplast	99.7775	16.0271	-968.609	1000	[- +1000]	rxn2PGADEHYDRATRXNChloroplast	99.7775	12.5927	-968.609	1000	[- +1000]	rxn2PGADEHYDRATRXNChloroplast	995.603	6.8494e-15	-948.132	1000	[- +1000]	rxn2PGADEHYDRATRXNChloroplast	1000	5.69245	-947.95	1000	[- +1000]	rxn2PGADEHYDRATRXNChloroplast	151.717	8.46538	-947.95	1000	[- +1000]
rxn2TRANSKETORXNchloroplast	-16.6667	-16.6667	-16.6667	-16.6667	-	rxn2TRANSKETORXNchloroplast	-16.6296	-16.6296	-16.6296	-16.6296	[- -]	rxn2TRANSKETORXNchloroplast	-16.6296	-16.6296	-16.6296	-16.6296	-	rxn2TRANSKETORXNchloroplast	-26.6667	-26.6667	-26.6667	-26.6667	-	rxn2TRANSKETORXNchloroplast	-26.9719	-26.9719	-26.972	-26.9719	[- -]	rxn2TRANSKETORXNchloroplast	-26.9719	-26.9719	-26.9719	-26.9719	-
rxn31214RXNmod	-4.25952e-27	0	0	0	0	rxn31214RXNmod	1.56656	1.56656	1.56655	1.56656	[+ +]	rxn31214RXNmod	1.56656	1.56656	1.56656	1.56656	+	rxn31214RXNmod	0	0	0	2.75018e-13	0	rxn31214RXNmod	1.58802	1.58802	1.58802	1.58803	[+ +]	rxn31214RXNmod	1.58802	1.58802	1.58802	1.58802	+
rxn3DehydroquinatedehydrataseRxnChloroplast	0	0	0	0	0	rxn3DehydroquinatedehydrataseRxnChloroplast	0	8.0202e-15	0	2.32894e-06	[0 +]	rxn3DehydroquinatedehydrataseRxnChloroplast	0	0	0	5.91599e-14	0	rxn3DehydroquinatedehydrataseRxnChloroplast	0	0	0	1.54959e-14	0	rxn3DehydroquinatedehydrataseRxnChloroplast	0	0	0	4.62751e-06	[0 +]	rxn3DehydroquinatedehydrataseRxnChloroplast	0	0	0	1.10139e-13	0
rxn3DehydroquinateSynthaseRxnChloroplast	0	0	0	0	0	rxn3DehydroquinateSynthaseRxnChloroplast	0	8.0202e-15	0	2.32894e-06	[0 +]	rxn3DehydroquinateSynthaseRxnChloroplast	0	0	0	5.91599e-14	0	rxn3DehydroquinateSynthaseRxnChloroplast	0	0	0	1.54959e-14	0	rxn3DehydroquinateSynthaseRxnChloroplast	0	0	0	4.62751e-06	[0 +]	rxn3DehydroquinateSynthaseRxnChloroplast	0	0	0	1.10139e-13	0
rxn3DEHYDROSPHINGANINEREDUCTASERXN	0	0	0	0	0	rxn3DEHYDROSPHINGANINEREDUCTASERXN	0	0	0	0	0	rxn3DEHYDROSPHINGANINEREDUCTASERXN	0	0	0	0	0	rxn3DEHYDROSPHINGANINEREDUCTASERXN	0	0	0	0	0	rxn3DEHYDROSPHINGANINEREDUCTASERXN	0	0	0	0	0	rxn3DEHYDROSPHINGANINEREDUCTASERXN	0	0	0	0	0
rxn3OXOACYLACPSYNTHRXNPalmitoylACPsMALONYLACP3oxostearoylACPsCARBONDIOXIDEACP67	-4.25952e-27	-3.39461e-33	0	0	0	rxn3OXOACYLACPSYNTHRXNPalmitoylACPsMALONYLACP3oxostearoylACPsCARBONDIOXIDEACP67	1.56656	1.56656	1.56655	1.56656	[+ +]	rxn3OXOACYLACPSYNTHRXNPalmitoylACPsMALONYLACP3oxostearoylACPsCARBONDIOXIDEACP67	1.56656	1.56656	1.56656	1.56656	+	rxn3OXOACYLACPSYNTHRXNPalmitoylACPsMALONYLACP3oxostearoylACPsCARBONDIOXIDEACP67	1.02486e-30	0	0	5.9654e-14	0	rxn3OXOACYLACPSYNTHRXNPalmitoylACPsMALONYLACP3oxostearoylACPsCARBONDIOXIDEACP67	1.58802	1.58802	1.58802	1.58803	[+ +]	rxn3OXOACYLACPSYNTHRXNPalmitoylACPsMALONYLACP3oxostearoylACPsCARBONDIOXIDEACP67	1.58802	1.58802	1.58802	1.58802	+
rxn3PGAREARRRXN	-100	-5.82737e-28	-998.707	967.098	[- +]	rxn3PGAREARRRXN	-83.7505	0	-991.896	984.636	[- +]	rxn3PGAREARRRXN	-83.7505	3.43437	-983.973	984.636	[- +]	rxn3PGAREARRRXN	-995.603	3.47997e-31	-995.603	948.132	[- +]	rxn3PGAREARRRXN	-983.753	6.4376	-989.703	964.197	[- +]	rxn3PGAREARRRXN	-135.47	7.78131	-983.753	964.196	[- +]
rxn3PGAREARRRXNChloroplast	100	2.86048e-16	-967.098	998.707	[- +]	rxn3PGAREARRRXNChloroplast	99.7775	16.0271	-968.609	1000	[- +1000]	rxn3PGAREARRRXNChloroplast	99.7775	12.5927	-968.609	1000	[- +1000]	rxn3PGAREARRRXNChloroplast	995.603	6.8494e-15	-948.132	1000	[- +1000]	rxn3PGAREARRRXNChloroplast	1000	5.69245	-947.95	1000	[- +1000]	rxn3PGAREARRRXNChloroplast	151.717	8.46538	-947.95	1000	[- +1000]
rxn42158RXN	-2.90928e-26	-3.39461e-33	-1.547e-25	6.60321e-14	0	rxn42158RXN	1.80756	1.80756	1.80756	1.80757	[+ +]	rxn42158RXN	1.80756	1.80756	1.80756	1.80756	+	rxn42158RXN	-1.28107e-31	0	-3.05921e-27	-4.34249e-15	0	rxn42158RXN	1.83233	1.83233	1.83233	1.83234	[+ +]	rxn42158RXN	1.83233	1.83233	1.83233	1.83233	+
rxn42161RXN	-3.20945e-26	-3.39461e-33	-1.56085e-25	6.60321e-14	0	rxn42161RXN	1.80756	1.80756	1.80756	1.80757	[+ +]	rxn42161RXN	1.80756	1.80756	1.80756	1.80756	+	rxn42161RXN	1.02486e-30	0	-3.05831e-27	-4.34249e-15	0	rxn42161RXN	1.83233	1.83233	1.83233	1.83234	[+ +]	rxn42161RXN	1.83233	1.83233	1.83233	1.83233	+
rxn5HydroxyferulicAcidOMethyltransferase	0	0	0	0	0	rxn5HydroxyferulicAcidOMethyltransferase	0	0	0	7.13093e-08	0	rxn5HydroxyferulicAcidOMethyltransferase	0	0	0	1.8985e-17	0	rxn5HydroxyferulicAcidOMethyltransferase	0	0	0	0	0	rxn5HydroxyferulicAcidOMethyltransferase	0	0	0	1.30179e-07	0	rxn5HydroxyferulicAcidOMethyltransferase	0	0	0	1.82887e-17	0
rxn6PFRUCTPHOSRXN	0	0	0	0	0	rxn6PFRUCTPHOSRXN	0	0	0	15.8466	[0 +]	rxn6PFRUCTPHOSRXN	0	0	0	0	0	rxn6PFRUCTPHOSRXN	0	0	0	1.44806e-11	0	rxn6PFRUCTPHOSRXN	0	0	0	5.94975	[0 +]	rxn6PFRUCTPHOSRXN	0	0	0	1.10636e-11	0
rxn6PFRUCTPHOSRXNChloroplast	0	0	0	0	0	rxn6PFRUCTPHOSRXNChloroplast	0	10.4236	0	15.8466	[0 +]	rxn6PFRUCTPHOSRXNChloroplast	0	0	0	0	0	rxn6PFRUCTPHOSRXNChloroplast	0	0	0	5.10046e-12	0	rxn6PFRUCTPHOSRXNChloroplast	0	0	0	5.94975	[0 +]	rxn6PFRUCTPHOSRXNChloroplast	0	0	0	8.51432e-12	0
rxn6PGLUCONOLACTRXN	0	0	0	0	0	rxn6PGLUCONOLACTRXN	0	0	0	0	0	rxn6PGLUCONOLACTRXN	0	0	0	0	0	rxn6PGLUCONOLACTRXN	0	0	0	0	0	rxn6PGLUCONOLACTRXN	0	0	0	0	0	rxn6PGLUCONOLACTRXN	0	0	0	0	0
rxn6PGLUCONOLACTRXNChloroplast	-3.4339e-24	0	0	0	0	rxn6PGLUCONOLACTRXNChloroplast	0	0	0	5.28219	[0 +]	rxn6PGLUCONOLACTRXNChloroplast	-1.21211e-25	0	0	0	0	rxn6PGLUCONOLACTRXNChloroplast	0	0	0	1.69955e-12	0	rxn6PGLUCONOLACTRXNChloroplast	0	0	0	0.000134969	[0 +]	rxn6PGLUCONOLACTRXNChloroplast	0	0	0	2.87488e-12	0
AtractFreeGalactoseSynthesis	0	0	0	0	0	AtractFreeGalactoseSynthesis	0	-4.37886e-15	0	7.92328	[0 +]	AtractFreeGalactoseSynthesis	0	0	0	4.0928e-12	0	AtractFreeGalactoseSynthesis	0	0	0	8.53599e-12	0	AtractFreeGalactoseSynthesis	0	0	0	2.97488	[0 +]	AtractFreeGalactoseSynthesis	0	0	0	5.46047e-12	0
ACETATECOALIGASERXN	-5.20958e-24	0	0	0	0	ACETATECOALIGASERXN	0	0	0	0	0	ACETATECOALIGASERXN	-1.39256e-26	0	0	0	0	ACETATECOALIGASERXN	0	0	0	0	0	ACETATECOALIGASERXN	0	0	0	0	0	ACETATECOALIGASERXN	-5.54276e-17	0	0	0	0
ACETATECOALIGASERXNchloroplast	5.02573e-24	-3.05515e-32	0	0	0	ACETATECOALIGASERXNchloroplast	8.52568	3.61513	0	15.8466	[0 +]	ACETATECOALIGASERXNchloroplast	7.7857e-26	0	0	5.89434e-12	0	ACETATECOALIGASERXNchloroplast	0	0	0	2.27924e-12	0	ACETATECOALIGASERXNchloroplast	-7.37028e-28	1.83233	0	5.94975	[0 +]	ACETATECOALIGASERXNchloroplast	5.54276e-17	8.46198e-30	0	8.96364e-12	0
AcetolactReductoIsomRXNChloroplast	8.44323e-26	0	0	0	0	AcetolactReductoIsomRXNChloroplast	0	7.00323e-15	8.45318e-26	3.34785e-06	[0 +]	AcetolactReductoIsomRXNChloroplast	0	0	0	1.04879e-14	0	AcetolactReductoIsomRXNChloroplast	0	0	0	0	0	AcetolactReductoIsomRXNChloroplast	0	0	0	6.98115e-06	[0 +]	AcetolactReductoIsomRXNChloroplast	0	0	0	0	0
AcetolactSynRXNChloroplast	8.44324e-26	0	0	0	0	AcetolactSynRXNChloroplast	0	7.00323e-15	8.4527e-26	3.34785e-06	[0 +]	AcetolactSynRXNChloroplast	0	0	0	1.04879e-14	0	AcetolactSynRXNChloroplast	0	0	0	0	0	AcetolactSynRXNChloroplast	0	0	0	6.98115e-06	[0 +]	AcetolactSynRXNChloroplast	0	0	0	0	0
AcetoOHbutReductoIsomRXNChloroplast	0	0	0	0	0	AcetoOHbutReductoIsomRXNChloroplast	0	1.55629e-15	0	2.81924e-06	[0 +]	AcetoOHbutReductoIsomRXNChloroplast	0	0	0	0	0	AcetoOHbutReductoIsomRXNChloroplast	0	0	0	1.64171e-13	0	AcetoOHbutReductoIsomRXNChloroplast	0	0	0	6.18178e-06	[0 +]	AcetoOHbutReductoIsomRXNChloroplast	0	0	0	0	0
AcetoOHButSynRXNChloroplast	0	0	0	0	0	AcetoOHButSynRXNChloroplast	0	1.55629e-15	0	2.81924e-06	[0 +]	AcetoOHButSynRXNChloroplast	0	0	0	0	0	AcetoOHButSynRXNChloroplast	0	0	0	1.64171e-13	0	AcetoOHButSynRXNChloroplast	0	0	0	6.18178e-06	[0 +]	AcetoOHButSynRXNChloroplast	0	0	0	0	0
ACETYLCOAACETYLTRANSFERRXN	-1.73184e-24	0	0	0	0	ACETYLCOAACETYLTRANSFERRXN	-2.85589e-16	0	0	0	0	ACETYLCOAACETYLTRANSFERRXN	-6.99362e-27	0	0	0	0	ACETYLCOAACETYLTRANSFERRXN	0	0	0	0	0	ACETYLCOAACETYLTRANSFERRXN	-8.59187e-17	0	0	0	0	ACETYLCOAACETYLTRANSFERRXN	-2.77138e-17	0	0	0	0
ACETYLCOACARBOXYLTRANSFERRXN	0	0	0	0	0	ACETYLCOACARBOXYLTRANSFERRXN	0	0	0	0	0	ACETYLCOACARBOXYLTRANSFERRXN	0	0	0	0	0	ACETYLCOACARBOXYLTRANSFERRXN	0	0	0	0	0	ACETYLCOACARBOXYLTRANSFERRXN	0	0	0	0	0	ACETYLCOACARBOXYLTRANSFERRXN	0	0	0	0	0
ACETYLCOACARBOXYLTRANSFERRXNchloroplast	-2.10389e-25	-2.71569e-32	0	0	0	ACETYLCOACARBOXYLTRANSFERRXNchloroplast	14.2195	14.2195	14.2195	14.2195	[+ +]	ACETYLCOACARBOXYLTRANSFERRXNchloroplast	14.2195	14.2195	14.2195	14.2195	+	ACETYLCOACARBOXYLTRANSFERRXNchloroplast	1.28107e-31	0	0	1.39955e-12	0	ACETYLCOACARBOXYLTRANSFERRXNchloroplast	14.4144	14.4144	14.4143	14.4144	[+ +]	ACETYLCOACARBOXYLTRANSFERRXNchloroplast	14.4144	14.4144	14.4144	14.4144	+
ACETYLGLUTKINRXNChloroplast	-6.46734e-26	1.21734e-16	0	0	0	ACETYLGLUTKINRXNChloroplast	-2.26007e-14	-9.88019e-15	0	2.64109	[0 +]	ACETYLGLUTKINRXNChloroplast	6.39851e-26	0	0	0	0	ACETYLGLUTKINRXNChloroplast	0	1.28126e-15	0	3.20499e-12	0	ACETYLGLUTKINRXNChloroplast	0	0	0	0.991625	[0 +]	ACETYLGLUTKINRXNChloroplast	0	0	0	2.26189e-12	0
ACETYLORNDEACETRXNChloroplast	4.89711e-31	-3.05515e-32	0	0	0	ACETYLORNDEACETRXNChloroplast	0	0	1.78505e-28	2.26379	[0 +]	ACETYLORNDEACETRXNChloroplast	7.77597e-26	0	0	2.41037e-13	0	ACETYLORNDEACETRXNChloroplast	0	0	0	9.61381e-13	0	ACETYLORNDEACETRXNChloroplast	0	0	0	0.849964	[0 +]	ACETYLORNDEACETRXNChloroplast	0	0	0	2.64727e-12	0
ACETYLORNTRANSAMRXNChloroplast	-6.46362e-26	1.21734e-16	0	0	0	ACETYLORNTRANSAMRXNChloroplast	-2.26007e-14	-9.88019e-15	0	2.64109	[0 +]	ACETYLORNTRANSAMRXNChloroplast	6.39003e-26	0	0	0	0	ACETYLORNTRANSAMRXNChloroplast	0	1.28126e-15	0	3.20499e-12	0	ACETYLORNTRANSAMRXNChloroplast	0	0	0	0.991625	[0 +]	ACETYLORNTRANSAMRXNChloroplast	0	0	0	2.26189e-12	0
AconitasePeroxisome	-6.18864e-24	1.03561e-32	-6.95095e-14	2.02752e-13	0	AconitasePeroxisome	0	0	0	2.85683e-05	[0 +]	AconitasePeroxisome	1.17976e-27	0	1.17976e-27	6.82239e-13	0	AconitasePeroxisome	0	3.92969e-15	-3.59889e-26	-5.91947e-14	0	AconitasePeroxisome	0	0	0	4.40715e-05	[0 +]	AconitasePeroxisome	0	0	0	2.42575e-13	0
ACONITATEDEHYDRRXNmitochondrion	1.44819e-13	0	0	0	0	ACONITATEDEHYDRRXNmitochondrion	1.10141e-13	0	0	5.35655e-05	[0 +]	ACONITATEDEHYDRRXNmitochondrion	-5.05964e-25	0	0	6.43471e-13	0	ACONITATEDEHYDRRXNmitochondrion	4.74711e-13	0	0	1.98912e-12	0	ACONITATEDEHYDRRXNmitochondrion	1.09521e-13	4.3732e-15	0	5.78438e-05	[0 +]	ACONITATEDEHYDRRXNmitochondrion	1.07133e-13	4.75876e-15	0	1.65465e-12	0
ACONITATEHYDRRXNmitochondrion	1.44819e-13	0	0	0	0	ACONITATEHYDRRXNmitochondrion	1.10141e-13	0	0	5.35655e-05	[0 +]	ACONITATEHYDRRXNmitochondrion	-5.0572e-25	0	0	6.43471e-13	0	ACONITATEHYDRRXNmitochondrion	4.74711e-13	0	0	1.98912e-12	0	ACONITATEHYDRRXNmitochondrion	1.09521e-13	4.3732e-15	0	5.78438e-05	[0 +]	ACONITATEHYDRRXNmitochondrion	1.07133e-13	4.75876e-15	0	1.65465e-12	0
ACSERLYRXNChloroplast	0	0	0	1.40945e-13	0	ACSERLYRXNChloroplast	0	0	0	2.81924e-06	[0 +]	ACSERLYRXNChloroplast	0	0	0	1.45492e-13	0	ACSERLYRXNChloroplast	0	0	0	-1.07867e-13	0	ACSERLYRXNChloroplast	0	0	0	6.63782e-06	[0 +]	ACSERLYRXNChloroplast	0	0	0	-1.73969e-13	0
ACYLCOASYNRXNBUTYRICACIDCOAATPBUTYRYLCOAPPIAMP43	0	0	0	0	0	ACYLCOASYNRXNBUTYRICACIDCOAATPBUTYRYLCOAPPIAMP43	0	0	0	7.92328	[0 +]	ACYLCOASYNRXNBUTYRICACIDCOAATPBUTYRYLCOAPPIAMP43	0	0	0	0	0	ACYLCOASYNRXNBUTYRICACIDCOAATPBUTYRYLCOAPPIAMP43	0	2.60923e-28	0	8.15315e-12	0	ACYLCOASYNRXNBUTYRICACIDCOAATPBUTYRYLCOAPPIAMP43	0	0	0	2.97488	[0 +]	ACYLCOASYNRXNBUTYRICACIDCOAATPBUTYRYLCOAPPIAMP43	0	0	0	4.26913e-12	0
ADENOSINEKINASERXN	0	-3.65379e-32	0	0	0	ADENOSINEKINASERXN	2.1308e-16	9.79637e-15	0	15.8466	[0 +]	ADENOSINEKINASERXN	0	0	0	0	0	ADENOSINEKINASERXN	0	0	0	1.83405e-11	0	ADENOSINEKINASERXN	0	0	0	5.94975	[0 +]	ADENOSINEKINASERXN	0	0	0	8.39917e-12	0
ADENOSYLHOMOCYSTEINASERXN	5.70144e-14	-3.65379e-32	0	0	0	ADENOSYLHOMOCYSTEINASERXN	2.1308e-16	9.79637e-15	0	2.81924e-06	[0 +]	ADENOSYLHOMOCYSTEINASERXN	4.40953e-14	0	0	6.60558e-14	0	ADENOSYLHOMOCYSTEINASERXN	0	0	0	0	0	ADENOSYLHOMOCYSTEINASERXN	0	0	0	6.63782e-06	[0 +]	ADENOSYLHOMOCYSTEINASERXN	0	0	0	2.10537e-13	0
ADENYLKINRXN	5.70144e-14	-3.99325e-32	0	0	0	ADENYLKINRXN	1.80756	1.80756	1.80756	9.73084	[+ +]	ADENYLKINRXN	1.80756	1.80756	1.80756	1.80756	+	ADENYLKINRXN	3.18756e-47	2.55296e-28	0	6.82336e-12	0	ADENYLKINRXN	1.83233	1.83233	1.83233	4.80721	[+ +]	ADENYLKINRXN	1.83233	1.83233	1.83233	1.83233	+
ADENYLKINRXNchloroplast	-8.70461e-14	1.00415e-11	0	0	0	ADENYLKINRXNchloroplast	6.50545e-16	0	1.30338e-25	15.8466	[0 +]	ADENYLKINRXNchloroplast	1.29242e-24	1.09382e-11	0	2.8029e-12	0	ADENYLKINRXNchloroplast	-8.04018e-13	1.28126e-15	0	1.96634e-11	0	ADENYLKINRXNchloroplast	1.38412e-26	0	9.76415e-21	5.94975	[0 +]	ADENYLKINRXNchloroplast	0	-1.93571e-28	0	8.37894e-12	0
ADENYLOSUCCINATESYNTHASERXNChloroplast	0	0	0	0	0	ADENYLOSUCCINATESYNTHASERXNChloroplast	0	7.78121e-16	0	2.4348e-06	[0 +]	ADENYLOSUCCINATESYNTHASERXNChloroplast	0	0	0	0	0	ADENYLOSUCCINATESYNTHASERXNChloroplast	0	0	0	0	0	ADENYLOSUCCINATESYNTHASERXNChloroplast	0	0	0	5.43499e-06	[0 +]	ADENYLOSUCCINATESYNTHASERXNChloroplast	0	0	0	0	0
ADPREDUCTRXN	0	0	0	0	0	ADPREDUCTRXN	0	0	0	0	0	ADPREDUCTRXN	0	0	0	0	0	ADPREDUCTRXN	0	0	0	0	0	ADPREDUCTRXN	0	0	0	0	0	ADPREDUCTRXN	0	0	0	0	0
AICARSYNRXNChloroplast	0	0	0	0	0	AICARSYNRXNChloroplast	0	0	0	0	0	AICARSYNRXNChloroplast	0	0	0	0	0	AICARSYNRXNChloroplast	0	0	0	0	0	AICARSYNRXNChloroplast	0	0	0	0	0	AICARSYNRXNChloroplast	0	0	0	0	0
AICARTRANSFORMRXNChloroplast	0	0	0	3.56129e-13	0	AICARTRANSFORMRXNChloroplast	0	7.78121e-16	0	2.4348e-06	[0 +]	AICARTRANSFORMRXNChloroplast	0	0	0	-1.11653e-13	0	AICARTRANSFORMRXNChloroplast	0	0	0	-1.24361e-13	0	AICARTRANSFORMRXNChloroplast	0	0	0	5.43499e-06	[0 +]	AICARTRANSFORMRXNChloroplast	0	0	0	-1.446e-13	0
AIRCARBOXYRXN	0	0	0	0	0	AIRCARBOXYRXN	0	0	0	0	0	AIRCARBOXYRXN	0	0	0	0	0	AIRCARBOXYRXN	0	0	0	0	0	AIRCARBOXYRXN	0	0	0	0	0	AIRCARBOXYRXN	0	0	0	0	0
AIRSRXN	0	0	0	0	0	AIRSRXN	0	0	0	0	0	AIRSRXN	0	0	0	0	0	AIRSRXN	0	0	0	0	0	AIRSRXN	0	0	0	0	0	AIRSRXN	0	0	0	0	0
ALANINEAMINOTRANSFERASERXN	-1.47033e-24	2.60499e-16	-6.49203e-13	3.22986e-13	0	ALANINEAMINOTRANSFERASERXN	-1.10141e-13	-2.72347e-15	-5.35655e-05	5.35655e-05	[- +]	ALANINEAMINOTRANSFERASERXN	6.67768e-24	0	-1.09781e-12	6.37332e-13	0	ALANINEAMINOTRANSFERASERXN	0	0	5.66716e-13	2.09377e-13	0	ALANINEAMINOTRANSFERASERXN	-1.09521e-13	0	-5.78438e-05	3.52093e-05	[- +]	ALANINEAMINOTRANSFERASERXN	-1.07133e-13	-4.07972e-29	-2.05683e-12	5.23152e-13	0
ALANINEGLYOXYLATEAMINOTRANSFERASERXN	0	-2.60499e-16	0	0	0	ALANINEGLYOXYLATEAMINOTRANSFERASERXN	1.10141e-13	0	0	5.35655e-05	[0 +]	ALANINEGLYOXYLATEAMINOTRANSFERASERXN	0	0	0	6.43471e-13	0	ALANINEGLYOXYLATEAMINOTRANSFERASERXN	0	0	0	1.98912e-12	0	ALANINEGLYOXYLATEAMINOTRANSFERASERXN	1.09521e-13	0	0	5.78438e-05	[0 +]	ALANINEGLYOXYLATEAMINOTRANSFERASERXN	1.07133e-13	4.75876e-15	0	1.65465e-12	0
ALCOHOLDEHYDROGRXN	6.45279e-24	0	-5.37732e-25	2.39057e-13	0	ALCOHOLDEHYDROGRXN	0	0	0	2.67828e-05	[0 +]	ALCOHOLDEHYDROGRXN	0	0	3.92958e-26	4.91271e-14	0	ALCOHOLDEHYDROGRXN	0	0	0	1.18257e-13	0	ALCOHOLDEHYDROGRXN	0	0	7.71357e-21	8.09814e-05	[0 +]	ALCOHOLDEHYDROGRXN	0	0	0	-9.18029e-13	0
ALDOSE1EPIMRXN	0	0	0	0	0	ALDOSE1EPIMRXN	0	-4.37886e-15	0	7.92328	[0 +]	ALDOSE1EPIMRXN	0	0	0	4.0928e-12	0	ALDOSE1EPIMRXN	0	-1.64055e-28	0	8.53599e-12	0	ALDOSE1EPIMRXN	0	0	0	2.97488	[0 +]	ALDOSE1EPIMRXN	0	0	0	5.46047e-12	0
AminoAcidSink	0	0	0	0	0	AminoAcidSink	0	0	0	0	0	AminoAcidSink	0	0	0	0	0	AminoAcidSink	0	0	0	0	0	AminoAcidSink	0	0	0	0	0	AminoAcidSink	0	0	0	0	0
AMPDEAMINASERXN	0	1.1078e-30	0	0	0	AMPDEAMINASERXN	0	-2.40962e-31	0	0	0	AMPDEAMINASERXN	0	0	0	0	0	AMPDEAMINASERXN	0	1.60806e-30	0	0	0	AMPDEAMINASERXN	0	0	0	0	0	AMPDEAMINASERXN	0	0	0	0	0
AMPDEPHOSPHORYLATIONRXN	-5.70144e-14	0	0	0	0	AMPDEPHOSPHORYLATIONRXN	0	0	0	15.8466	[0 +]	AMPDEPHOSPHORYLATIONRXN	-4.40953e-14	0	0	0	0	AMPDEPHOSPHORYLATIONRXN	0	0	0	1.83405e-11	0	AMPDEPHOSPHORYLATIONRXN	0	0	0	5.94975	[0 +]	AMPDEPHOSPHORYLATIONRXN	0	0	0	8.39917e-12	0
AMPSYNRXNChloroplast	0	0	0	3.56129e-13	0	AMPSYNRXNChloroplast	0	7.78121e-16	0	2.4348e-06	[0 +]	AMPSYNRXNChloroplast	0	0	0	-1.11653e-13	0	AMPSYNRXNChloroplast	0	0	0	-1.24361e-13	0	AMPSYNRXNChloroplast	0	0	0	5.43499e-06	[0 +]	AMPSYNRXNChloroplast	0	0	0	-1.446e-13	0
AnthranSynRxnChloroplast	0	0	0	0	0	AnthranSynRxnChloroplast	0	0	0	0	0	AnthranSynRxnChloroplast	0	0	0	0	0	AnthranSynRxnChloroplast	0	0	0	0	0	AnthranSynRxnChloroplast	0	0	0	0	0	AnthranSynRxnChloroplast	0	0	0	0	0
ArabinoseTransfermod	0	0	0	0	0	ArabinoseTransfermod	0	1.27384e-14	0	3.86598e-07	0	ArabinoseTransfermod	0	0	0	0	0	ArabinoseTransfermod	0	0	0	0	0	ArabinoseTransfermod	0	0	0	7.05755e-07	0	ArabinoseTransfermod	0	0	0	9.91505e-17	0
ArabinoxylanSynthesismod	0	0	0	0	0	ArabinoxylanSynthesismod	0	0	0	0	0	ArabinoxylanSynthesismod	0	0	0	0	0	ArabinoxylanSynthesismod	0	0	0	0	0	ArabinoxylanSynthesismod	0	0	0	0	0	ArabinoxylanSynthesismod	0	0	0	0	0
ARGINASERXN	0	0	0	0	0	ARGINASERXN	0	0	0	2.64109	[0 +]	ARGINASERXN	6.38696e-26	0	0	0	0	ARGINASERXN	0	0	0	3.24216e-12	0	ARGINASERXN	4.2082e-14	0	0	0.991625	[0 +]	ARGINASERXN	2.28721e-14	-7.22789e-16	0	1.17994e-12	0
ARGSUCCINLYARXNChloroplast	-6.47162e-26	1.21734e-16	-2.92252e-25	9.6471e-13	0	ARGSUCCINLYARXNChloroplast	-2.26007e-14	-9.88019e-15	0	2.64109	[0 +]	ARGSUCCINLYARXNChloroplast	6.38015e-26	0	6.38015e-26	-1.94539e-12	0	ARGSUCCINLYARXNChloroplast	0	1.28126e-15	-3.75034e-26	3.20499e-12	0	ARGSUCCINLYARXNChloroplast	0	0	2.22746e-21	0.991625	[0 +]	ARGSUCCINLYARXNChloroplast	0	0	0	2.26189e-12	0
ARGSUCCINSYNRXNChloroplast	-6.48607e-26	1.21734e-16	0	0	0	ARGSUCCINSYNRXNChloroplast	-2.26007e-14	-9.88019e-15	0	2.64109	[0 +]	ARGSUCCINSYNRXNChloroplast	6.38241e-26	0	0	0	0	ARGSUCCINSYNRXNChloroplast	0	1.28126e-15	0	3.20499e-12	0	ARGSUCCINSYNRXNChloroplast	0	0	0	0.991625	[0 +]	ARGSUCCINSYNRXNChloroplast	0	0	0	2.26189e-12	0
AscorbateProductionmodmitochondrion	0	0	0	0	0	AscorbateProductionmodmitochondrion	0	0	0	0	0	AscorbateProductionmodmitochondrion	0	0	0	0	0	AscorbateProductionmodmitochondrion	0	0	0	0	0	AscorbateProductionmodmitochondrion	0	0	0	0	0	AscorbateProductionmodmitochondrion	0	0	0	0	0
ASNSYNBRXN	0	0	0	0	0	ASNSYNBRXN	0	0	0	3.82611e-06	[0 +]	ASNSYNBRXN	0	0	0	0	0	ASNSYNBRXN	0	0	0	0	0	ASNSYNBRXN	0	0	0	9.20243e-06	[0 +]	ASNSYNBRXN	0	0	0	0	0
AspAminotransChloroplast	-5.752e-14	-1.21734e-16	-1.22514e-12	-5.70385e-26	0	AspAminotransChloroplast	2.26007e-14	5.9895e-15	-2.64109	2.36675e-27	[- 0]	AspAminotransChloroplast	-4.44505e-14	0	9.47346e-13	-2.98382e-32	0	AspAminotransChloroplast	0	-1.28126e-15	-3.20499e-12	4.29122e-26	0	AspAminotransChloroplast	0	0	-0.991625	-2.21997e-21	[- 0]	AspAminotransChloroplast	0	0	-2.46464e-12	0	0
ASPAMINOTRANSRXN	-999.138	0	-999.138	1000	[- +1000]	ASPAMINOTRANSRXN	-1000	0	-1000	1000	[-1000 +1000]	ASPAMINOTRANSRXN	-1000	0	-1000	1000	[-1000 +1000]	ASPAMINOTRANSRXN	-1000	-3.92969e-15	-1000	992.931	[-1000 +]	ASPAMINOTRANSRXN	-1000	0	-1000	989.886	[-1000 +]	ASPAMINOTRANSRXN	-1000	0	-1000	989.886	[-1000 +]
ASPAMINOTRANSRXNMitochondrion	999.138	0	-1000	999.138	[-1000 +]	ASPAMINOTRANSRXNMitochondrion	1000	-2.72347e-15	-1000	1000	[-1000 +1000]	ASPAMINOTRANSRXNMitochondrion	1000	0	-1000	1000	[-1000 +1000]	ASPAMINOTRANSRXNMitochondrion	1000	3.92969e-15	-992.931	1000	[- +1000]	ASPAMINOTRANSRXNMitochondrion	1000	0	-989.886	1000	[- +1000]	ASPAMINOTRANSRXNMitochondrion	1000	0	-989.886	1000	[- +1000]
AspartateKinChloroplast	5.752e-14	0	0	0	0	AspartateKinChloroplast	0	3.11257e-15	0	4.46379e-06	[0 +]	AspartateKinChloroplast	4.44505e-14	0	2.98382e-32	0	0	AspartateKinChloroplast	0	0	0	0	0	AspartateKinChloroplast	0	0	0	1.03822e-05	[0 +]	AspartateKinChloroplast	0	0	0	0	0
AspartateSemialdehydeDehydrogenaseChloroplast	5.752e-14	0	0	0	0	AspartateSemialdehydeDehydrogenaseChloroplast	0	3.11257e-15	0	4.46379e-06	[0 +]	AspartateSemialdehydeDehydrogenaseChloroplast	4.44505e-14	0	2.98382e-32	0	0	AspartateSemialdehydeDehydrogenaseChloroplast	0	0	0	0	0	AspartateSemialdehydeDehydrogenaseChloroplast	0	0	0	1.03822e-05	[0 +]	AspartateSemialdehydeDehydrogenaseChloroplast	0	0	0	0	0
ASPCARBTRANSRXN	0	0	0	0	0	ASPCARBTRANSRXN	0	0	0	0	0	ASPCARBTRANSRXN	0	0	0	0	0	ASPCARBTRANSRXN	0	0	0	0	0	ASPCARBTRANSRXN	0	0	0	0	0	ASPCARBTRANSRXN	0	0	0	0	0
ATPPHOSPHORIBOSYLTRANSRXNChloroplast	0	0	0	0	0	ATPPHOSPHORIBOSYLTRANSRXNChloroplast	0	7.78121e-16	0	2.4348e-06	[0 +]	ATPPHOSPHORIBOSYLTRANSRXNChloroplast	0	0	0	0	0	ATPPHOSPHORIBOSYLTRANSRXNChloroplast	0	0	0	0	0	ATPPHOSPHORIBOSYLTRANSRXNChloroplast	0	0	0	5.43499e-06	[0 +]	ATPPHOSPHORIBOSYLTRANSRXNChloroplast	0	0	0	0	0
BIOTINCARBOXYLRXN	0	0	0	0	0	BIOTINCARBOXYLRXN	0	0	0	0	0	BIOTINCARBOXYLRXN	0	0	0	0	0	BIOTINCARBOXYLRXN	0	0	0	0	0	BIOTINCARBOXYLRXN	0	0	0	0	0	BIOTINCARBOXYLRXN	0	0	0	0	0
BranchedChainAminoTransferIleRXNChloroplast	0	0	6.89411e-14	0	0	BranchedChainAminoTransferIleRXNChloroplast	0	-1.55629e-15	-2.81924e-06	0	[- 0]	BranchedChainAminoTransferIleRXNChloroplast	0	0	1.03546e-13	0	0	BranchedChainAminoTransferIleRXNChloroplast	0	0	-1.64171e-13	0	0	BranchedChainAminoTransferIleRXNChloroplast	0	0	-6.18178e-06	0	[- 0]	BranchedChainAminoTransferIleRXNChloroplast	0	0	9.22774e-14	0	0
BranchedChainAminoTransferLeuRXNChloroplast	-8.44357e-26	0	3.86434e-14	0	0	BranchedChainAminoTransferLeuRXNChloroplast	0	-5.44694e-15	-2.81924e-06	0	[- 0]	BranchedChainAminoTransferLeuRXNChloroplast	0	0	-2.03239e-13	0	0	BranchedChainAminoTransferLeuRXNChloroplast	0	0	-1.66001e-13	0	0	BranchedChainAminoTransferLeuRXNChloroplast	0	0	-5.43499e-06	0	[- 0]	BranchedChainAminoTransferLeuRXNChloroplast	0	0	-9.5412e-14	0	0
BranchedChainAminoTransferValRXNChloroplast	0	0	3.27819e-13	0	0	BranchedChainAminoTransferValRXNChloroplast	0	-1.55629e-15	-3.34785e-06	-8.45223e-26	[- 0]	BranchedChainAminoTransferValRXNChloroplast	0	0	-1.04879e-14	0	0	BranchedChainAminoTransferValRXNChloroplast	0	0	1.2774e-13	0	0	BranchedChainAminoTransferValRXNChloroplast	0	0	-6.98115e-06	0	[- 0]	BranchedChainAminoTransferValRXNChloroplast	0	0	9.60177e-14	0	0
C10c0CoAACX	0	-3.39461e-33	0	0	0	C10c0CoAACX	1.83797e-27	0	0	4.86959e-06	[0 +]	C10c0CoAACX	-1.4863e-27	-4.16097e-31	0	2.0659e-13	0	C10c0CoAACX	-1.28107e-31	0	0	0	0	C10c0CoAACX	-6.54094e-30	-2.69359e-14	0	7.56835e-06	[0 +]	C10c0CoAACX	0	0	0	1.96301e-13	0
C10c1d2transCoAECHD	0	-3.39461e-33	0	1.07192e-13	0	C10c1d2transCoAECHD	1.83728e-27	0	0	4.86959e-06	[0 +]	C10c1d2transCoAECHD	-1.48739e-27	-4.41574e-31	0	2.0659e-13	0	C10c1d2transCoAECHD	-1.28107e-31	0	0	-4.34249e-15	0	C10c1d2transCoAECHD	-6.42043e-30	-2.69359e-14	-1.82494e-21	7.56835e-06	[0 +]	C10c1d2transCoAECHD	0	0	0	1.96301e-13	0
C10c1d4cisCoAACX	5.41523e-24	0	0	0	0	C10c1d4cisCoAACX	-1.72517e-29	0	0	3.69417e-06	[0 +]	C10c1d4cisCoAACX	0	0	0	3.64589e-14	0	C10c1d4cisCoAACX	0	-9.24536e-30	0	6.77316e-14	0	C10c1d4cisCoAACX	-2.39303e-30	0	0	6.18178e-06	[0 +]	C10c1d4cisCoAACX	0	0	0	1.00771e-13	0
C10c2d2trans4cisCoAECHD	5.41626e-24	0	0	-1.37984e-13	0	C10c2d2trans4cisCoAECHD	-1.72016e-29	0	0	3.69417e-06	[0 +]	C10c2d2trans4cisCoAECHD	0	0	0	3.64589e-14	0	C10c2d2trans4cisCoAECHD	0	-9.23523e-30	5.97263e-27	6.77316e-14	0	C10c2d2trans4cisCoAECHD	-3.25543e-30	0	0	6.18178e-06	[0 +]	C10c2d2trans4cisCoAECHD	0	0	0	1.00771e-13	0
C10c2d4cis7cisCoAACX	-6.79044e-24	0	0	0	0	C10c2d4cis7cisCoAACX	-1.61502e-27	0	0	3.45584e-06	[0 +]	C10c2d4cis7cisCoAACX	1.58185e-27	0	0	0	0	C10c2d4cis7cisCoAACX	0	0	0	2.15589e-13	0	C10c2d4cis7cisCoAACX	4.30745e-30	0	0	5.95451e-06	[0 +]	C10c2d4cis7cisCoAACX	0	0	0	1.50925e-13	0
C10c3d2trans4cis7cisCoAECHD	-6.79019e-24	0	-1.01813e-14	7.19721e-14	0	C10c3d2trans4cis7cisCoAECHD	-1.61549e-27	0	0	3.45584e-06	[0 +]	C10c3d2trans4cis7cisCoAECHD	1.58401e-27	0	1.58401e-27	-1.59753e-13	0	C10c3d2trans4cis7cisCoAECHD	0	0	-1.59084e-13	2.15589e-13	0	C10c3d2trans4cis7cisCoAECHD	4.25015e-30	0	0	5.95451e-06	[0 +]	C10c3d2trans4cis7cisCoAECHD	0	0	0	1.50925e-13	0
C12c0CoAACX	0	-3.39461e-33	0	0	0	C12c0CoAACX	1.8393e-27	0	0	4.86959e-06	[0 +]	C12c0CoAACX	-1.4863e-27	-4.16097e-31	0	2.0659e-13	0	C12c0CoAACX	-1.28107e-31	0	0	0	0	C12c0CoAACX	-5.6635e-30	-2.42423e-13	0	7.56835e-06	[0 +]	C12c0CoAACX	0	0	0	1.96301e-13	0
C12c1d2transCoAECHD	0	-3.39461e-33	0	1.07192e-13	0	C12c1d2transCoAECHD	1.83909e-27	0	0	4.86959e-06	[0 +]	C12c1d2transCoAECHD	-1.48275e-27	-3.91054e-31	0	2.0659e-13	0	C12c1d2transCoAECHD	-1.28107e-31	0	0	-4.34249e-15	0	C12c1d2transCoAECHD	-6.56657e-30	-2.69359e-14	-1.82494e-21	7.56835e-06	[0 +]	C12c1d2transCoAECHD	0	0	0	1.96301e-13	0
C12c1d3cisCoAISO	0	0	0	-8.28044e-14	0	C12c1d3cisCoAISO	0	0	0	3.96782e-06	[0 +]	C12c1d3cisCoAISO	0	0	0	2.02426e-13	0	C12c1d3cisCoAISO	0	0	0	2.75018e-13	0	C12c1d3cisCoAISO	-8.49214e-31	2.15487e-13	1.70147e-22	6.42709e-06	[0 +]	C12c1d3cisCoAISO	0	0	0	5.61836e-14	0
C12c2d2trans6cisCoAECHD	5.4172e-24	0	0	-1.37984e-13	0	C12c2d2trans6cisCoAECHD	-1.75691e-29	0	0	3.69417e-06	[0 +]	C12c2d2trans6cisCoAECHD	0	0	0	3.64589e-14	0	C12c2d2trans6cisCoAECHD	0	-9.24964e-30	5.96282e-27	6.77316e-14	0	C12c2d2trans6cisCoAECHD	-2.26115e-30	0	0	6.18178e-06	[0 +]	C12c2d2trans6cisCoAECHD	0	0	0	1.00771e-13	0
C12c2d3cis6cisCoAISO	5.41713e-24	0	0	-1.37984e-13	0	C12c2d3cis6cisCoAISO	-1.75768e-29	0	0	3.69417e-06	[0 +]	C12c2d3cis6cisCoAISO	0	0	0	3.64589e-14	0	C12c2d3cis6cisCoAISO	0	-9.25001e-30	5.97676e-27	6.77316e-14	0	C12c2d3cis6cisCoAISO	-3.1542e-30	0	0	6.18178e-06	[0 +]	C12c2d3cis6cisCoAISO	0	0	0	1.00771e-13	0
C12c3d2trans6cis9cisCoAECHD	-6.7901e-24	0	-1.01813e-14	7.19721e-14	0	C12c3d2trans6cis9cisCoAECHD	-1.61596e-27	0	0	3.45584e-06	[0 +]	C12c3d2trans6cis9cisCoAECHD	1.58668e-27	0	1.58668e-27	-1.59753e-13	0	C12c3d2trans6cis9cisCoAECHD	0	0	-1.59084e-13	2.15589e-13	0	C12c3d2trans6cis9cisCoAECHD	4.27917e-30	0	0	5.95451e-06	[0 +]	C12c3d2trans6cis9cisCoAECHD	0	0	0	1.50925e-13	0
C12c3d3cis6cis9cisCoAISO	-6.79149e-24	0	-1.01813e-14	7.19721e-14	0	C12c3d3cis6cis9cisCoAISO	-1.61616e-27	0	0	3.45584e-06	[0 +]	C12c3d3cis6cis9cisCoAISO	1.58462e-27	0	1.58462e-27	-1.59753e-13	0	C12c3d3cis6cis9cisCoAISO	0	0	-1.59084e-13	2.15589e-13	0	C12c3d3cis6cis9cisCoAISO	4.2807e-30	0	0	5.95451e-06	[0 +]	C12c3d3cis6cis9cisCoAISO	0	0	0	1.50925e-13	0
C14c0CoAACX	0	-3.39461e-33	0	0	0	C14c0CoAACX	1.84195e-27	0	0	4.86959e-06	[0 +]	C14c0CoAACX	-1.48099e-27	-4.99316e-31	0	2.0659e-13	0	C14c0CoAACX	-1.28107e-31	0	0	0	0	C14c0CoAACX	-5.6635e-30	-2.42423e-13	0	7.56835e-06	[0 +]	C14c0CoAACX	0	0	0	1.96301e-13	0
C14c1d2transCoAECHD	0	-3.39461e-33	0	1.07192e-13	0	C14c1d2transCoAECHD	1.84021e-27	0	0	4.86959e-06	[0 +]	C14c1d2transCoAECHD	-1.48446e-27	-5.39702e-31	0	2.0659e-13	0	C14c1d2transCoAECHD	-1.28107e-31	0	0	-4.34249e-15	0	C14c1d2transCoAECHD	-5.60657e-30	-2.42423e-13	-1.98995e-21	7.56835e-06	[0 +]	C14c1d2transCoAECHD	0	0	0	1.96301e-13	0
C14c1d5cisCoAACX	0	0	0	0	0	C14c1d5cisCoAACX	0	0	0	3.96782e-06	[0 +]	C14c1d5cisCoAACX	0	0	0	2.02426e-13	0	C14c1d5cisCoAACX	0	0	0	2.75018e-13	0	C14c1d5cisCoAACX	-8.57502e-31	2.15487e-13	0	6.42709e-06	[0 +]	C14c1d5cisCoAACX	0	0	0	5.61836e-14	0
C14c2d2trans5cisCoAECHD	0	0	0	-8.28044e-14	0	C14c2d2trans5cisCoAECHD	0	0	0	3.96782e-06	[0 +]	C14c2d2trans5cisCoAECHD	0	0	0	2.02426e-13	0	C14c2d2trans5cisCoAECHD	0	0	0	2.75018e-13	0	C14c2d2trans5cisCoAECHD	-8.59072e-31	2.15487e-13	1.70147e-22	6.42709e-06	[0 +]	C14c2d2trans5cisCoAECHD	0	0	0	5.61836e-14	0
C14c2d5cis8cisCoAACX	5.41659e-24	0	0	0	0	C14c2d5cis8cisCoAACX	-1.72517e-29	0	0	3.69417e-06	[0 +]	C14c2d5cis8cisCoAACX	0	0	0	3.64589e-14	0	C14c2d5cis8cisCoAACX	0	-9.2847e-30	0	6.77316e-14	0	C14c2d5cis8cisCoAACX	-2.39303e-30	0	0	6.18178e-06	[0 +]	C14c2d5cis8cisCoAACX	0	0	0	1.00771e-13	0
C14c3d2trans5cis8cisCoAECHD	5.41626e-24	0	0	-1.37984e-13	0	C14c3d2trans5cis8cisCoAECHD	-1.72016e-29	0	0	3.69417e-06	[0 +]	C14c3d2trans5cis8cisCoAECHD	0	0	0	3.64589e-14	0	C14c3d2trans5cis8cisCoAECHD	0	-9.25966e-30	5.97263e-27	6.77316e-14	0	C14c3d2trans5cis8cisCoAECHD	-3.25543e-30	0	0	6.18178e-06	[0 +]	C14c3d2trans5cis8cisCoAECHD	0	0	0	1.00771e-13	0
C14c3d5cis8cis11cisCoAACX	-6.7918e-24	0	0	0	0	C14c3d5cis8cis11cisCoAACX	-1.61569e-27	0	0	3.45584e-06	[0 +]	C14c3d5cis8cis11cisCoAACX	1.58185e-27	0	0	0	0	C14c3d5cis8cis11cisCoAACX	0	0	0	2.15589e-13	0	C14c3d5cis8cis11cisCoAACX	4.30745e-30	0	0	5.95451e-06	[0 +]	C14c3d5cis8cis11cisCoAACX	0	0	0	1.50925e-13	0
C14c4d2trans5cis8cis11cisCoAECHD	-6.79094e-24	0	-1.01813e-14	7.19721e-14	0	C14c4d2trans5cis8cis11cisCoAECHD	-1.61549e-27	0	0	3.45584e-06	[0 +]	C14c4d2trans5cis8cis11cisCoAECHD	1.58401e-27	0	1.58401e-27	-1.59753e-13	0	C14c4d2trans5cis8cis11cisCoAECHD	0	0	-1.59084e-13	2.15589e-13	0	C14c4d2trans5cis8cis11cisCoAECHD	4.25015e-30	0	0	5.95451e-06	[0 +]	C14c4d2trans5cis8cis11cisCoAECHD	0	0	0	1.50925e-13	0
C16c0CoAACX	0	-3.39461e-33	0	0	0	C16c0CoAACX	1.84062e-27	0	0	4.86959e-06	[0 +]	C16c0CoAACX	-1.48099e-27	-4.16097e-31	0	2.0659e-13	0	C16c0CoAACX	-1.28107e-31	0	0	0	0	C16c0CoAACX	-5.6635e-30	-2.42423e-13	0	7.56835e-06	[0 +]	C16c0CoAACX	0	0	0	1.96301e-13	0
C16c0LACS	0	0	0	0	0	C16c0LACS	0	0	0	0	0	C16c0LACS	0	0	0	0	0	C16c0LACS	0	0	0	0	0	C16c0LACS	0	0	0	0	0	C16c0LACS	0	0	0	0	0
C16c1d2transCoAECHD	0	-3.39461e-33	0	1.07192e-13	0	C16c1d2transCoAECHD	1.84167e-27	0	0	4.86959e-06	[0 +]	C16c1d2transCoAECHD	-1.48154e-27	-4.66106e-31	0	2.0659e-13	0	C16c1d2transCoAECHD	-1.28107e-31	0	0	-4.34249e-15	0	C16c1d2transCoAECHD	-5.60657e-30	-2.42423e-13	-1.98995e-21	7.56835e-06	[0 +]	C16c1d2transCoAECHD	0	0	-2.82589e-33	1.96301e-13	0
C16c1d7cisCoAACX	0	0	0	0	0	C16c1d7cisCoAACX	0	0	0	3.96782e-06	[0 +]	C16c1d7cisCoAACX	0	0	0	2.02426e-13	0	C16c1d7cisCoAACX	0	0	0	2.75018e-13	0	C16c1d7cisCoAACX	-8.77443e-31	2.15487e-13	0	6.42709e-06	[0 +]	C16c1d7cisCoAACX	0	0	0	5.61836e-14	0
C16c2d2trans7cisCoAECHD	0	0	0	-8.28044e-14	0	C16c2d2trans7cisCoAECHD	0	0	0	3.96782e-06	[0 +]	C16c2d2trans7cisCoAECHD	0	0	0	2.02426e-13	0	C16c2d2trans7cisCoAECHD	0	0	0	2.75018e-13	0	C16c2d2trans7cisCoAECHD	-8.81679e-31	2.15487e-13	1.70147e-22	6.42709e-06	[0 +]	C16c2d2trans7cisCoAECHD	0	0	0	5.61836e-14	0
C16c2d7cis10cisCoAACX	5.41795e-24	0	0	0	0	C16c2d7cis10cisCoAACX	-1.79152e-29	0	0	3.69417e-06	[0 +]	C16c2d7cis10cisCoAACX	0	0	0	3.64589e-14	0	C16c2d7cis10cisCoAACX	0	-9.2847e-30	0	6.77316e-14	0	C16c2d7cis10cisCoAACX	-1.58538e-30	0	0	6.18178e-06	[0 +]	C16c2d7cis10cisCoAACX	0	0	0	1.00771e-13	0
C16c3d2trans7cis10cisCoAECHD	5.41776e-24	0	0	-1.37984e-13	0	C16c3d2trans7cis10cisCoAECHD	-1.75676e-29	0	0	3.69417e-06	[0 +]	C16c3d2trans7cis10cisCoAECHD	0	0	0	3.64589e-14	0	C16c3d2trans7cis10cisCoAECHD	0	-9.28409e-30	5.96105e-27	6.77316e-14	0	C16c3d2trans7cis10cisCoAECHD	-2.17029e-30	0	0	6.18178e-06	[0 +]	C16c3d2trans7cis10cisCoAECHD	0	0	0	1.00771e-13	0
C16c3d7cis10cis13cisCoAACX	-6.79248e-24	0	0	0	0	C16c3d7cis10cis13cisCoAACX	-1.61569e-27	0	0	3.45584e-06	[0 +]	C16c3d7cis10cis13cisCoAACX	1.57919e-27	0	0	0	0	C16c3d7cis10cis13cisCoAACX	0	0	0	2.15589e-13	0	C16c3d7cis10cis13cisCoAACX	4.30745e-30	0	0	5.95451e-06	[0 +]	C16c3d7cis10cis13cisCoAACX	0	0	0	1.50925e-13	0
C16c4d2trans7cis10cis13cisCoAECHD	-6.79169e-24	0	-1.01813e-14	7.19721e-14	0	C16c4d2trans7cis10cis13cisCoAECHD	-1.61549e-27	0	0	3.45584e-06	[0 +]	C16c4d2trans7cis10cis13cisCoAECHD	1.57816e-27	0	1.57816e-27	-1.59753e-13	0	C16c4d2trans7cis10cis13cisCoAECHD	0	0	-1.59084e-13	2.15589e-13	0	C16c4d2trans7cis10cis13cisCoAECHD	4.25015e-30	0	0	5.95451e-06	[0 +]	C16c4d2trans7cis10cis13cisCoAECHD	0	0	0	1.50925e-13	0
C18c0CoAACX	0	-3.39461e-33	0	0	0	C18c0CoAACX	0	0	0	4.28524e-06	[0 +]	C18c0CoAACX	0	-5.40926e-31	0	4.83956e-14	0	C18c0CoAACX	0	0	0	5.9654e-14	0	C18c0CoAACX	0	0	0	6.69268e-06	[0 +]	C18c0CoAACX	0	0	0	1.89309e-13	0
C18c0LACS	0	0	0	0	0	C18c0LACS	0	0	0	0	0	C18c0LACS	0	0	0	0	0	C18c0LACS	0	0	0	0	0	C18c0LACS	0	0	0	0	0	C18c0LACS	0	0	0	0	0
C18c1d2transCoAECHD	0	-3.39461e-33	0	1.51639e-13	0	C18c1d2transCoAECHD	0	0	0	4.28524e-06	[0 +]	C18c1d2transCoAECHD	0	-5.88766e-31	0	4.83956e-14	0	C18c1d2transCoAECHD	0	0	0	5.9654e-14	0	C18c1d2transCoAECHD	0	0	-1.98747e-21	6.69268e-06	[0 +]	C18c1d2transCoAECHD	0	0	0	1.89309e-13	0
C18c1d9cisCoAACX	0	0	0	0	0	C18c1d9cisCoAACX	0	0	0	3.96782e-06	[0 +]	C18c1d9cisCoAACX	0	0	0	2.02426e-13	0	C18c1d9cisCoAACX	0	0	0	2.75018e-13	0	C18c1d9cisCoAACX	-9.06368e-31	2.15487e-13	0	6.42709e-06	[0 +]	C18c1d9cisCoAACX	0	0	0	5.61836e-14	0
C18c1d9cisLACS	0	0	0	0	0	C18c1d9cisLACS	0	0	0	0	0	C18c1d9cisLACS	0	0	0	0	0	C18c1d9cisLACS	0	0	0	0	0	C18c1d9cisLACS	0	0	0	0	0	C18c1d9cisLACS	0	0	0	0	0
C18c2d2trans9cisCoAECHD	0	0	0	-8.28044e-14	0	C18c2d2trans9cisCoAECHD	0	0	0	3.96782e-06	[0 +]	C18c2d2trans9cisCoAECHD	0	0	0	2.02426e-13	0	C18c2d2trans9cisCoAECHD	0	0	0	2.75018e-13	0	C18c2d2trans9cisCoAECHD	-9.04286e-31	2.15487e-13	1.70147e-22	6.42709e-06	[0 +]	C18c2d2trans9cisCoAECHD	0	0	0	5.61836e-14	0
C18c2d9cis12cisCoAACX	5.41931e-24	0	0	0	0	C18c2d9cis12cisCoAACX	-1.85788e-29	0	0	3.69417e-06	[0 +]	C18c2d9cis12cisCoAACX	0	0	0	3.64589e-14	0	C18c2d9cis12cisCoAACX	0	-9.28242e-30	0	6.77316e-14	0	C18c2d9cis12cisCoAACX	-1.85131e-30	0	0	6.18178e-06	[0 +]	C18c2d9cis12cisCoAACX	0	0	0	1.00771e-13	0
C18c2d9cis12cisLACS	0	0	0	0	0	C18c2d9cis12cisLACS	0	0	0	0	0	C18c2d9cis12cisLACS	0	0	0	0	0	C18c2d9cis12cisLACS	0	0	0	0	0	C18c2d9cis12cisLACS	0	0	0	0	0	C18c2d9cis12cisLACS	0	0	0	0	0
C18c3d2trans9cis12cisCoAECHD	5.41926e-24	0	0	-1.37984e-13	0	C18c3d2trans9cis12cisCoAECHD	-1.86656e-29	0	0	3.69417e-06	[0 +]	C18c3d2trans9cis12cisCoAECHD	0	0	0	3.64589e-14	0	C18c3d2trans9cis12cisCoAECHD	0	-9.28409e-30	5.94948e-27	6.77316e-14	0	C18c3d2trans9cis12cisCoAECHD	-1.08514e-30	0	0	6.18178e-06	[0 +]	C18c3d2trans9cis12cisCoAECHD	0	0	0	1.00771e-13	0
C18c3d9cis12cis15cisCoAACX	-6.79248e-24	0	0	0	0	C18c3d9cis12cis15cisCoAACX	-1.61635e-27	0	0	3.45584e-06	[0 +]	C18c3d9cis12cis15cisCoAACX	1.58185e-27	0	0	0	0	C18c3d9cis12cis15cisCoAACX	0	0	0	2.15589e-13	0	C18c3d9cis12cis15cisCoAACX	4.31971e-30	0	0	5.95451e-06	[0 +]	C18c3d9cis12cis15cisCoAACX	0	0	0	1.50925e-13	0
C18c3d9cis12cis15cisLACS	0	0	0	0	0	C18c3d9cis12cis15cisLACS	0	0	0	0	0	C18c3d9cis12cis15cisLACS	0	0	0	0	0	C18c3d9cis12cis15cisLACS	0	0	0	0	0	C18c3d9cis12cis15cisLACS	0	0	0	0	0	C18c3d9cis12cis15cisLACS	0	0	0	0	0
C18c4d2trans9cis12cis15cisCoAECHD	-6.79319e-24	0	-1.01813e-14	7.19721e-14	0	C18c4d2trans9cis12cis15cisCoAECHD	-1.61622e-27	0	0	3.45584e-06	[0 +]	C18c4d2trans9cis12cis15cisCoAECHD	1.58109e-27	0	1.58109e-27	-1.59753e-13	0	C18c4d2trans9cis12cis15cisCoAECHD	0	0	-1.59084e-13	2.15589e-13	0	C18c4d2trans9cis12cis15cisCoAECHD	4.25015e-30	0	0	5.95451e-06	[0 +]	C18c4d2trans9cis12cis15cisCoAECHD	0	0	0	1.50925e-13	0
C18c4d6cis9cis12cis15cisCoAACX	0	0	0	0	0	C18c4d6cis9cis12cis15cisCoAACX	0	0	0	0	0	C18c4d6cis9cis12cis15cisCoAACX	0	0	0	0	0	C18c4d6cis9cis12cis15cisCoAACX	0	0	0	0	0	C18c4d6cis9cis12cis15cisCoAACX	0	0	0	0	0	C18c4d6cis9cis12cis15cisCoAACX	0	0	0	0	0
C18c4d6cis9cis12cis15cisCoAECHD	0	0	0	0	0	C18c4d6cis9cis12cis15cisCoAECHD	0	0	0	0	0	C18c4d6cis9cis12cis15cisCoAECHD	0	0	0	0	0	C18c4d6cis9cis12cis15cisCoAECHD	0	0	0	0	0	C18c4d6cis9cis12cis15cisCoAECHD	0	0	0	0	0	C18c4d6cis9cis12cis15cisCoAECHD	0	0	0	0	0
C18c4d6cis9cis12cis15cisLACS	0	0	0	0	0	C18c4d6cis9cis12cis15cisLACS	0	0	0	0	0	C18c4d6cis9cis12cis15cisLACS	0	0	0	0	0	C18c4d6cis9cis12cis15cisLACS	0	0	0	0	0	C18c4d6cis9cis12cis15cisLACS	0	0	0	0	0	C18c4d6cis9cis12cis15cisLACS	0	0	0	0	0
C20c0CoAACX	0	0	0	0	0	C20c0CoAACX	0	0	0	0	0	C20c0CoAACX	0	0	0	0	0	C20c0CoAACX	0	0	0	0	0	C20c0CoAACX	0	0	0	0	0	C20c0CoAACX	0	0	0	0	0
C20c0LACS	0	0	0	0	0	C20c0LACS	0	0	0	0	0	C20c0LACS	0	0	0	0	0	C20c0LACS	0	0	0	0	0	C20c0LACS	0	0	0	0	0	C20c0LACS	0	0	0	0	0
C20c1d11cisCoAACX	0	0	0	0	0	C20c1d11cisCoAACX	0	0	0	0	0	C20c1d11cisCoAACX	0	0	0	0	0	C20c1d11cisCoAACX	0	0	0	0	0	C20c1d11cisCoAACX	0	0	0	0	0	C20c1d11cisCoAACX	0	0	0	0	0
C20c1d11cisLACS	0	0	0	0	0	C20c1d11cisLACS	0	0	0	0	0	C20c1d11cisLACS	0	0	0	0	0	C20c1d11cisLACS	0	0	0	0	0	C20c1d11cisLACS	0	0	0	0	0	C20c1d11cisLACS	0	0	0	0	0
C20c1d2transCoAECHD	0	0	0	0	0	C20c1d2transCoAECHD	0	0	0	0	0	C20c1d2transCoAECHD	0	0	0	0	0	C20c1d2transCoAECHD	0	0	0	0	0	C20c1d2transCoAECHD	0	0	0	0	0	C20c1d2transCoAECHD	0	0	0	0	0
C20c2d2trans11cisCoAECHD	0	0	0	0	0	C20c2d2trans11cisCoAECHD	0	0	0	0	0	C20c2d2trans11cisCoAECHD	0	0	0	0	0	C20c2d2trans11cisCoAECHD	0	0	0	0	0	C20c2d2trans11cisCoAECHD	0	0	0	0	0	C20c2d2trans11cisCoAECHD	0	0	0	0	0
C20c3d11cis14cis17cisCoAACX	0	0	0	0	0	C20c3d11cis14cis17cisCoAACX	0	0	0	0	0	C20c3d11cis14cis17cisCoAACX	0	0	0	0	0	C20c3d11cis14cis17cisCoAACX	0	0	0	0	0	C20c3d11cis14cis17cisCoAACX	0	0	0	0	0	C20c3d11cis14cis17cisCoAACX	0	0	0	0	0
C20c3d11cis14cis17cisLACS	0	0	0	0	0	C20c3d11cis14cis17cisLACS	0	0	0	0	0	C20c3d11cis14cis17cisLACS	0	0	0	0	0	C20c3d11cis14cis17cisLACS	0	0	0	0	0	C20c3d11cis14cis17cisLACS	0	0	0	0	0	C20c3d11cis14cis17cisLACS	0	0	0	0	0
C20c4d2trans11cis14cis17cisCoAECHD	0	0	0	0	0	C20c4d2trans11cis14cis17cisCoAECHD	0	0	0	0	0	C20c4d2trans11cis14cis17cisCoAECHD	0	0	0	0	0	C20c4d2trans11cis14cis17cisCoAECHD	0	0	0	0	0	C20c4d2trans11cis14cis17cisCoAECHD	0	0	0	0	0	C20c4d2trans11cis14cis17cisCoAECHD	0	0	0	0	0
C22c0CoAACX	0	0	0	0	0	C22c0CoAACX	0	0	0	0	0	C22c0CoAACX	0	0	0	0	0	C22c0CoAACX	0	0	0	0	0	C22c0CoAACX	0	0	0	0	0	C22c0CoAACX	0	0	0	0	0
C22c0LACS	0	0	0	0	0	C22c0LACS	0	0	0	0	0	C22c0LACS	0	0	0	0	0	C22c0LACS	0	0	0	0	0	C22c0LACS	0	0	0	0	0	C22c0LACS	0	0	0	0	0
C22c1d13cisCoAACX	0	0	0	0	0	C22c1d13cisCoAACX	0	0	0	0	0	C22c1d13cisCoAACX	0	0	0	0	0	C22c1d13cisCoAACX	0	0	0	0	0	C22c1d13cisCoAACX	0	0	0	0	0	C22c1d13cisCoAACX	0	0	0	0	0
C22c1d13cisLACS	0	0	0	0	0	C22c1d13cisLACS	0	0	0	0	0	C22c1d13cisLACS	0	0	0	0	0	C22c1d13cisLACS	0	0	0	0	0	C22c1d13cisLACS	0	0	0	0	0	C22c1d13cisLACS	0	0	0	0	0
C22c1d2transCoAECHD	0	0	0	0	0	C22c1d2transCoAECHD	0	0	0	0	0	C22c1d2transCoAECHD	0	0	0	0	0	C22c1d2transCoAECHD	0	0	0	0	0	C22c1d2transCoAECHD	0	0	0	0	0	C22c1d2transCoAECHD	0	0	0	0	0
C22c2d2trans13cisCoAECHD	0	0	0	0	0	C22c2d2trans13cisCoAECHD	0	0	0	0	0	C22c2d2trans13cisCoAECHD	0	0	0	0	0	C22c2d2trans13cisCoAECHD	0	0	0	0	0	C22c2d2trans13cisCoAECHD	0	0	0	0	0	C22c2d2trans13cisCoAECHD	0	0	0	0	0
C4c0CoAACX	-1.37351e-24	-3.39461e-33	0	0	0	C4c0CoAACX	2.02873e-28	0	0	4.86959e-06	[0 +]	C4c0CoAACX	8.04526e-29	-3.95159e-31	2.68065e-28	2.0659e-13	0	C4c0CoAACX	-1.28107e-31	-9.20602e-30	0	0	0	C4c0CoAACX	-3.46989e-30	-2.69359e-14	0	7.56835e-06	[0 +]	C4c0CoAACX	0	0	0	1.96301e-13	0
C4c1d2transCoAECHD	-1.37359e-24	-3.39461e-33	-6.96544e-14	-7.00943e-14	0	C4c1d2transCoAECHD	2.0271e-28	0	0	4.86959e-06	[0 +]	C4c1d2transCoAECHD	8.04986e-29	-3.91921e-31	2.68207e-28	2.0659e-13	0	C4c1d2transCoAECHD	-1.28107e-31	-9.19696e-30	-1.41086e-13	-3.71626e-14	0	C4c1d2transCoAECHD	-3.47232e-30	-2.69359e-14	6.97873e-23	7.56835e-06	[0 +]	C4c1d2transCoAECHD	0	0	0	1.96301e-13	0
C6c0CoAACX	5.41523e-24	-3.39461e-33	0	0	0	C6c0CoAACX	1.82005e-27	0	0	4.86959e-06	[0 +]	C6c0CoAACX	-1.49161e-27	-3.95159e-31	0	2.0659e-13	0	C6c0CoAACX	-1.28107e-31	-9.20602e-30	0	1.4828e-13	0	C6c0CoAACX	-7.65769e-30	-2.69359e-14	0	7.56835e-06	[0 +]	C6c0CoAACX	0	0	0	1.96301e-13	0
C6c1d2transCoAECHD	-1.37415e-24	-3.39461e-33	-6.96544e-14	-7.00943e-14	0	C6c1d2transCoAECHD	2.03085e-28	0	0	4.86959e-06	[0 +]	C6c1d2transCoAECHD	9.53141e-29	-4.27329e-31	2.61595e-28	2.0659e-13	0	C6c1d2transCoAECHD	-1.28107e-31	-9.20096e-30	-1.41086e-13	-3.71626e-14	0	C6c1d2transCoAECHD	-3.42201e-30	-2.69359e-14	6.97873e-23	7.56835e-06	[0 +]	C6c1d2transCoAECHD	0	0	0	1.96301e-13	0
C6c1d3cisCoAISO	-6.79188e-24	0	-1.01813e-14	7.19721e-14	0	C6c1d3cisCoAISO	-1.61572e-27	0	0	3.45584e-06	[0 +]	C6c1d3cisCoAISO	1.58367e-27	0	1.58367e-27	-1.59753e-13	0	C6c1d3cisCoAISO	0	0	-1.59084e-13	2.15589e-13	0	C6c1d3cisCoAISO	4.19299e-30	0	0	5.95451e-06	[0 +]	C6c1d3cisCoAISO	0	0	0	1.50925e-13	0
C8c0CoAACX	0	-3.39461e-33	0	0	0	C8c0CoAACX	1.83664e-27	0	0	4.86959e-06	[0 +]	C8c0CoAACX	-1.49161e-27	-2.91268e-31	0	2.0659e-13	0	C8c0CoAACX	-1.28107e-31	0	0	0	0	C8c0CoAACX	-6.38141e-30	-2.69359e-14	0	7.56835e-06	[0 +]	C8c0CoAACX	0	0	0	1.96301e-13	0
C8c1d2cisCoAECHD	5.41493e-24	0	0	-1.37984e-13	0	C8c1d2cisCoAECHD	-1.70386e-29	0	0	3.69417e-06	[0 +]	C8c1d2cisCoAECHD	0	0	0	3.64589e-14	0	C8c1d2cisCoAECHD	0	-9.23555e-30	5.97595e-27	6.77316e-14	0	C8c1d2cisCoAECHD	-3.5369e-30	0	0	6.18178e-06	[0 +]	C8c1d2cisCoAECHD	0	0	0	1.00771e-13	0
C8c1d2transCoAECHD	0	-3.39461e-33	0	1.07192e-13	0	C8c1d2transCoAECHD	1.83582e-27	0	0	4.86959e-06	[0 +]	C8c1d2transCoAECHD	-1.49032e-27	-3.43447e-31	0	2.0659e-13	0	C8c1d2transCoAECHD	-1.28107e-31	0	0	-4.34249e-15	0	C8c1d2transCoAECHD	-6.37399e-30	-2.69359e-14	-1.82494e-21	7.56835e-06	[0 +]	C8c1d2transCoAECHD	0	0	0	1.96301e-13	0
C8c2d2cis5cisCoAECHD	-6.79057e-24	0	-1.01813e-14	7.19721e-14	0	C8c2d2cis5cisCoAECHD	-1.61526e-27	0	0	3.45584e-06	[0 +]	C8c2d2cis5cisCoAECHD	1.58421e-27	0	1.58421e-27	-1.59753e-13	0	C8c2d2cis5cisCoAECHD	0	0	-1.59084e-13	2.15589e-13	0	C8c2d2cis5cisCoAECHD	4.14996e-30	0	0	5.95451e-06	[0 +]	C8c2d2cis5cisCoAECHD	0	0	0	1.50925e-13	0
CAFFEOYLCOAOMETHYLTRANSFERASERXN	0	0	0	0	0	CAFFEOYLCOAOMETHYLTRANSFERASERXN	0	3.66004e-15	0	1.11078e-07	0	CAFFEOYLCOAOMETHYLTRANSFERASERXN	0	0	0	0	0	CAFFEOYLCOAOMETHYLTRANSFERASERXN	0	0	0	0	0	CAFFEOYLCOAOMETHYLTRANSFERASERXN	0	0	0	2.02779e-07	0	CAFFEOYLCOAOMETHYLTRANSFERASERXN	0	0	0	2.84882e-17	0
CalloseSynthesismod	0	0	0	0	0	CalloseSynthesismod	0	0	0	0	0	CalloseSynthesismod	0	0	0	0	0	CalloseSynthesismod	0	0	0	0	0	CalloseSynthesismod	0	0	0	0	0	CalloseSynthesismod	0	0	0	0	0
CarbohydratesSink	0	0	0	0	0	CarbohydratesSink	0	1.49547e-11	0	0.000453859	[0 +]	CarbohydratesSink	0	0	0	0	0	CarbohydratesSink	0	0	0	0	0	CarbohydratesSink	0	0	0	0.000828543	[0 +]	CarbohydratesSink	0	0	0	1.16401e-13	0
CarboxycyclohexadienylDehydrataseRxnChloroplast	0	0	0	0	0	CarboxycyclohexadienylDehydrataseRxnChloroplast	0	2.33441e-15	0	2.2319e-06	[0 +]	CarboxycyclohexadienylDehydrataseRxnChloroplast	0	0	0	6.14475e-14	0	CarboxycyclohexadienylDehydrataseRxnChloroplast	0	0	0	3.43342e-14	0	CarboxycyclohexadienylDehydrataseRxnChloroplast	0	0	0	4.49897e-06	[0 +]	CarboxycyclohexadienylDehydrataseRxnChloroplast	0	0	0	3.40318e-14	0
CARBPSYNRXNChloroplast	-6.48757e-26	1.21734e-16	0	0	0	CARBPSYNRXNChloroplast	-2.26007e-14	-9.88019e-15	0	2.64109	[0 +]	CARBPSYNRXNChloroplast	6.38004e-26	0	0	0	0	CARBPSYNRXNChloroplast	0	1.28126e-15	0	3.20499e-12	0	CARBPSYNRXNChloroplast	0	0	0	0.991625	[0 +]	CARBPSYNRXNChloroplast	0	0	0	2.26189e-12	0
CATALRXNperoxisome	-7.25584e-25	-1.35784e-32	0	0	0	CATALRXNperoxisome	2.3435e-27	0	0	1.7141e-05	[0 +]	CATALRXNperoxisome	-1.24629e-27	-1.67933e-30	0	1.93582e-13	0	CATALRXNperoxisome	10	10	10	10	+	CATALRXNperoxisome	10.1145	10.1145	10.1145	10.1145	[+ +]	CATALRXNperoxisome	10.1145	10.1145	10.1145	10.1145	+
CDPDIGLYSYNRXN	0	0	0	0	0	CDPDIGLYSYNRXN	0	0	0	0	0	CDPDIGLYSYNRXN	0	0	0	0	0	CDPDIGLYSYNRXN	0	0	0	0	0	CDPDIGLYSYNRXN	0	0	0	0	0	CDPDIGLYSYNRXN	0	0	0	0	0
CDPKINRXN	0	4.86934e-16	0	9.89905e-12	0	CDPKINRXN	7.10266e-17	0	0	15.8466	[0 +]	CDPKINRXN	-1.77596e-16	-3.07605e-17	-1.77596e-16	-2.11832e-11	0	CDPKINRXN	0	4.50361e-16	0	1.83405e-11	0	CDPKINRXN	0	1.23042e-16	5.36348e-17	5.94975	[0 +]	CDPKINRXN	3.33993e-17	7.88636e-17	3.33993e-17	8.39927e-12	0
CDPKINRXNChloroplast	0	0	0	0	0	CDPKINRXNChloroplast	0	0	0	0	0	CDPKINRXNChloroplast	0	0	0	0	0	CDPKINRXNChloroplast	0	0	0	0	0	CDPKINRXNChloroplast	0	0	0	0	0	CDPKINRXNChloroplast	0	0	0	0	0
CDPREDUCTRXN	0	0	0	0	0	CDPREDUCTRXN	0	0	0	0	0	CDPREDUCTRXN	0	0	0	0	0	CDPREDUCTRXN	0	0	0	0	0	CDPREDUCTRXN	0	0	0	0	0	CDPREDUCTRXN	0	0	0	0	0
CELLULOSESYNTHASEmod	0	0	0	0	0	CELLULOSESYNTHASEmod	0	4.4864e-12	0	0.000136158	[0 +]	CELLULOSESYNTHASEmod	0	0	0	0	0	CELLULOSESYNTHASEmod	0	0	0	0	0	CELLULOSESYNTHASEmod	0	0	0	0.000248563	[0 +]	CELLULOSESYNTHASEmod	0	0	0	3.49203e-14	0
chloroplastatractferredoxinexchange	0	0	0	6.82828e-12	0	chloroplastatractferredoxinexchange	0	3.54185e-27	0	31.6931	[0 +]	chloroplastatractferredoxinexchange	0	0	0	1.80276e-11	0	chloroplastatractferredoxinexchange	20	11.2069	0	20	[0 +]	chloroplastatractferredoxinexchange	20.229	0	0	32.1284	[0 +]	chloroplastatractferredoxinexchange	0	0	0	20.229	[0 +]
chloroplastacetateexchange	5.02494e-24	0	-3.04505e-14	2.70715e-13	0	chloroplastacetateexchange	8.52568	3.61513	8.21161e-16	15.8466	[0 +]	chloroplastacetateexchange	1.393e-26	0	-3.66249e-13	5.89434e-12	0	chloroplastacetateexchange	0	0	-1.12921e-13	5.16321e-14	0	chloroplastacetateexchange	-7.38714e-28	1.83233	-8.48441e-20	5.94975	[0 +]	chloroplastacetateexchange	5.54276e-17	8.41725e-30	-3.40534e-13	8.96364e-12	0
chloroplastammoniaexchange	-5.752e-14	0	-3.78919e-13	-9.47942e-14	0	chloroplastammoniaexchange	0	-1.16722e-15	-7.93563e-06	1.48362e-28	[- 0]	chloroplastammoniaexchange	-4.44505e-14	0	1.19321e-13	-4.44505e-14	0	chloroplastammoniaexchange	0	0	-3.60326e-14	-9.42259e-41	0	chloroplastammoniaexchange	0	3.19055e-16	-1.8943e-05	-9.84579e-14	[- 0]	chloroplastammoniaexchange	0	0	4.69162e-13	0	0
ChloroplastArgExchange	6.48152e-26	-1.21734e-16	-9.6471e-13	2.9227e-25	0	ChloroplastArgExchange	2.26007e-14	9.88019e-15	-2.64109	0	[- 0]	ChloroplastArgExchange	-6.39556e-26	0	1.94539e-12	-6.39556e-26	0	ChloroplastArgExchange	0	-1.28126e-15	-3.20499e-12	3.74793e-26	0	ChloroplastArgExchange	0	0	-0.991625	-2.22746e-21	[- 0]	ChloroplastArgExchange	0	0	-2.26189e-12	0	0
ChloroplastATPADPexchange	898.707	0	0	898.707	[0 +]	ChloroplastATPADPexchange	912.634	0	0	944.508	[0 +]	ChloroplastATPADPexchange	896.788	0	0	912.815	[0 +]	ChloroplastATPADPexchange	0	0	0	845.603	[0 +]	ChloroplastATPADPexchange	0	0	0	872.947	[0 +]	ChloroplastATPADPexchange	861.048	0	0	861.048	[0 +]
chloroplastCO2exchange	50	50	50	50	+	chloroplastCO2exchange	35.6693	35.6693	18.0151	49.7082	[+ +]	chloroplastCO2exchange	33.8617	33.8617	33.8617	33.8617	+	chloroplastCO2exchange	60	60	60	60	+	chloroplastCO2exchange	44.4402	46.2725	38.4904	50.3899	[+ +]	chloroplastCO2exchange	44.4402	44.4402	44.4402	44.4402	+
chloroplastcysteineexchange	5.752e-14	0	1.08292e-13	2.32575e-27	0	chloroplastcysteineexchange	0	-3.8907e-16	-1.57546e-06	1.11581e-28	[- 0]	chloroplastcysteineexchange	4.44505e-14	0	8.24754e-14	4.76711e-32	0	chloroplastcysteineexchange	0	0	-9.89036e-15	-7.06914e-30	0	chloroplastcysteineexchange	0	0	-3.55181e-06	-3.66933e-23	[- 0]	chloroplastcysteineexchange	0	0	8.65015e-14	0	0
chloroplastfumarateexchange	-6.48131e-26	1.21734e-16	-2.92222e-25	9.6471e-13	0	chloroplastfumarateexchange	-2.26007e-14	-9.10207e-15	0	2.64109	[0 +]	chloroplastfumarateexchange	6.36934e-26	0	6.36934e-26	-1.94539e-12	0	chloroplastfumarateexchange	0	1.28126e-15	-3.73265e-26	3.20499e-12	0	chloroplastfumarateexchange	0	0	2.22746e-21	0.991625	[0 +]	chloroplastfumarateexchange	0	0	0	2.26189e-12	0
ChloroplastGlnGluExchange	-6.47793e-26	1.21734e-16	-2.9257e-25	9.6471e-13	0	ChloroplastGlnGluExchange	-2.26007e-14	-9.10207e-15	0	2.64109	[0 +]	ChloroplastGlnGluExchange	6.36926e-26	0	6.36926e-26	-1.94539e-12	0	ChloroplastGlnGluExchange	0	1.28126e-15	-3.74218e-26	3.20499e-12	0	ChloroplastGlnGluExchange	0	0	2.22746e-21	0.991625	[0 +]	ChloroplastGlnGluExchange	0	0	0	2.26189e-12	0
chloroplastglycolateexchange	0	0	0	0	0	chloroplastglycolateexchange	0	0	0	0	0	chloroplastglycolateexchange	0	0	0	0	0	chloroplastglycolateexchange	20	20	20	20	+	chloroplastglycolateexchange	20.229	20.229	20.2289	20.229	[+ +]	chloroplastglycolateexchange	20.229	20.229	20.229	20.229	+
chloroplastglycolateglycerateexchange	2.34997e-27	5.12637e-32	-1.3894e-27	-1.07411e-12	0	chloroplastglycolateglycerateexchange	0	0	0	2.85683e-05	[0 +]	chloroplastglycolateglycerateexchange	0	0	0	5.95506e-13	0	chloroplastglycolateglycerateexchange	10	10	10	10	+	chloroplastglycolateglycerateexchange	10.1145	5.99784	4.16472	16.0642	[+ +]	chloroplastglycolateglycerateexchange	10.1145	10.1145	10.1145	10.1145	+
ChloroplastGlyExchange	0	0	-3.56129e-13	0	0	ChloroplastGlyExchange	0	-7.78121e-16	-2.4348e-06	0	[- 0]	ChloroplastGlyExchange	0	0	1.11653e-13	0	0	ChloroplastGlyExchange	0	0	1.24361e-13	0	0	ChloroplastGlyExchange	0	0	-5.43499e-06	0	[- 0]	ChloroplastGlyExchange	0	0	1.446e-13	0	0
chloroplasthistidinetateexchange	0	0	-3.56129e-13	0	0	chloroplasthistidinetateexchange	0	-7.78121e-16	-2.4348e-06	0	[- 0]	chloroplasthistidinetateexchange	0	0	1.11653e-13	0	0	chloroplasthistidinetateexchange	0	0	1.24361e-13	0	0	chloroplasthistidinetateexchange	0	0	-5.43499e-06	0	[- 0]	chloroplasthistidinetateexchange	0	0	1.446e-13	0	0
ChloroplasticATPasemodchloroplast	50.431	50.431	50.431	50.431	+	ChloroplasticATPasemodchloroplast	50.431	50.431	50.431	50.431	[+ +]	ChloroplasticATPasemodchloroplast	50.431	50.431	50.431	50.431	+	ChloroplasticATPasemodchloroplast	81.4655	81.4655	81.4655	81.4655	+	ChloroplasticATPasemodchloroplast	81.4655	81.4655	81.4654	81.4656	[+ +]	ChloroplasticATPasemodchloroplast	81.4655	81.4655	81.4655	81.4655	+
chloroplastisoleucineexchange	0	0	6.89411e-14	0	0	chloroplastisoleucineexchange	0	-1.55629e-15	-2.81924e-06	0	[- 0]	chloroplastisoleucineexchange	0	0	1.03546e-13	0	0	chloroplastisoleucineexchange	0	0	-1.64171e-13	0	0	chloroplastisoleucineexchange	0	0	-6.18178e-06	0	[- 0]	chloroplastisoleucineexchange	0	0	9.22774e-14	0	0
chloroplastleucineexchange	-8.44321e-26	0	3.86434e-14	0	0	chloroplastleucineexchange	0	-5.44694e-15	-2.81924e-06	0	[- 0]	chloroplastleucineexchange	0	0	-2.03239e-13	0	0	chloroplastleucineexchange	0	0	-1.66001e-13	0	0	chloroplastleucineexchange	0	0	-5.43499e-06	0	[- 0]	chloroplastleucineexchange	0	0	-9.5412e-14	0	0
chloroplastlightexchange	466.487	466.487	466.487	466.487	+	chloroplastlightexchange	466.487	466.487	466.487	466.487	[+ +]	chloroplastlightexchange	466.487	466.487	466.487	466.487	+	chloroplastlightexchange	753.556	753.556	753.556	753.556	+	chloroplastlightexchange	753.556	753.556	753.555	753.556	[+ +]	chloroplastlightexchange	753.556	753.556	753.556	753.556	+
chloroplastlysineexchange	0	0	-1.20363e-13	0	0	chloroplastlysineexchange	0	-7.78121e-16	-2.4348e-06	0	[- 0]	chloroplastlysineexchange	0	0	6.93602e-14	0	0	chloroplastlysineexchange	0	0	2.42008e-14	0	0	chloroplastlysineexchange	0	0	-5.54667e-06	0	[- 0]	chloroplastlysineexchange	0	0	1.89755e-13	0	0
chloroplastmalateexchange	899.138	0.431034	0.431034	899.138	[+ +]	chloroplastmalateexchange	921.642	0.482017	-31.3918	928.963	[- +]	chloroplastmalateexchange	913.116	0.301261	0.301261	913.116	[+ +]	chloroplastmalateexchange	1.46552	-2.93103	-8.53448	847.069	[- +]	chloroplastmalateexchange	10.6031	0	-21.7085	867.303	[- +]	chloroplastmalateexchange	851.239	-1.34371	-9.80909	861.353	[- +]
ChloroplastMalGluExchange	-5.752e-14	-3.65201e-16	1.10399e-12	-1.69147e-25	0	ChloroplastMalGluExchange	6.78022e-14	7.61393e-15	-7.92328	-5.54694e-26	[- 0]	ChloroplastMalGluExchange	-4.44505e-14	0	-4.27865e-12	2.98382e-32	0	ChloroplastMalGluExchange	-1.2737e-28	-3.84377e-15	-9.61498e-12	1.2737e-25	0	ChloroplastMalGluExchange	0	0	-2.97488	-6.65992e-21	[- 0]	ChloroplastMalGluExchange	0	0	-6.78566e-12	-1.11152e-29	0
chloroplastmethionineexchange	-5.752e-14	0	4.02945e-14	0	0	chloroplastmethionineexchange	0	3.8907e-16	-2.81924e-06	5.01876e-28	[- 0]	chloroplastmethionineexchange	-4.44505e-14	0	9.43865e-14	-2.98382e-32	0	chloroplastmethionineexchange	0	0	1.07867e-13	-9.42259e-41	0	chloroplastmethionineexchange	0	0	-6.63782e-06	0	[- 0]	chloroplastmethionineexchange	0	0	1.73969e-13	0	0
ChloroplastNitriteExchange	0	0	0	2.2823e-13	0	ChloroplastNitriteExchange	0	0	0	7.93563e-06	[0 +]	ChloroplastNitriteExchange	0	0	0	6.92975e-14	0	ChloroplastNitriteExchange	0	0	0	3.60326e-14	0	ChloroplastNitriteExchange	0	-3.19055e-16	9.84579e-14	1.8943e-05	[0 +]	ChloroplastNitriteExchange	0	0	0	-4.69162e-13	0
chloroplastO2exchange	-50.431	-50.431	-50.431	-50.431	-	chloroplastO2exchange	-48.8645	-48.8645	-48.8645	-48.8645	[- -]	chloroplastO2exchange	-48.8645	-48.8645	-48.8645	-48.8645	-	chloroplastO2exchange	-61.4655	-61.4655	-61.4655	-61.4655	-	chloroplastO2exchange	-59.6485	-59.6485	-59.6486	-59.6485	[- -]	chloroplastO2exchange	-59.6485	-59.6485	-59.6485	-59.6485	-
ChloroplastOleateExchange	-4.25952e-27	0	-1.10064e-27	-8.28827e-14	0	ChloroplastOleateExchange	1.56656	1.56656	1.56655	1.56656	[+ +]	ChloroplastOleateExchange	1.56656	1.56656	1.56656	1.56656	+	ChloroplastOleateExchange	0	0	4.08913e-26	2.75018e-13	0	ChloroplastOleateExchange	1.58802	1.58802	1.58802	1.58803	[+ +]	ChloroplastOleateExchange	1.58802	1.58802	1.58802	1.58802	+
chloroplastoxaloacetateexchange	-899.138	-0.431034	-899.138	-0.431034	[- -]	chloroplastoxaloacetateexchange	-914.924	1.32555	-928.963	31.3918	[- +]	chloroplastoxaloacetateexchange	-913.116	-0.301261	-913.116	-0.301261	[- -]	chloroplastoxaloacetateexchange	-1.46552	2.93103	-847.069	8.53448	[- +]	chloroplastoxaloacetateexchange	-10.6031	0	-867.303	21.7085	[- +]	chloroplastoxaloacetateexchange	-851.239	1.34371	-861.353	9.80909	[- +]
ChloroplastOxoglutarateExchange	-5.752e-14	-2.43467e-16	3.23447e-12	-1.13509e-25	0	ChloroplastOxoglutarateExchange	4.52014e-14	-2.26626e-15	-5.28219	-5.54479e-26	[- 0]	ChloroplastOxoglutarateExchange	-4.44505e-14	0	-3.43726e-12	2.98382e-32	0	ChloroplastOxoglutarateExchange	0	-2.56251e-15	-6.40999e-12	8.51321e-26	0	ChloroplastOxoglutarateExchange	0	0	-1.98325	-4.43995e-21	[- 0]	ChloroplastOxoglutarateExchange	0	0	-4.53292e-12	-1.17874e-29	0
ChloroplastPalmitateExchange	-2.49628e-26	0	-1.55111e-25	6.60321e-14	0	ChloroplastPalmitateExchange	0.241009	0.241009	0.241008	0.241013	[+ +]	ChloroplastPalmitateExchange	0.241009	0.241009	0.241009	0.241009	+	ChloroplastPalmitateExchange	3.18756e-47	0	1.20109e-26	-4.34249e-15	0	ChloroplastPalmitateExchange	0.244311	0.244311	0.244311	0.244318	[+ +]	ChloroplastPalmitateExchange	0.244311	0.244311	0.244311	0.244311	+
chloroplastpepexchange	-100	-1.00417e-11	-998.707	967.098	[- +]	chloroplastpepexchange	-91.0711	-5.42269	-1000	984.636	[-1000 +]	chloroplastpepexchange	-83.7505	-12.5927	-1000	984.636	[-1000 +]	chloroplastpepexchange	-995.603	-6.8494e-15	-995.603	948.132	[- +]	chloroplastpepexchange	-989.702	0	-1000	964.197	[-1000 +]	chloroplastpepexchange	-151.717	7.75923e-29	-1000	964.196	[-1000 +]
ChloroplastPheExchange	0	0	1.23062e-13	0	0	ChloroplastPheExchange	0	-2.33441e-15	-2.2319e-06	0	[- 0]	ChloroplastPheExchange	0	0	-6.14475e-14	0	0	ChloroplastPheExchange	0	0	-3.43342e-14	0	0	ChloroplastPheExchange	0	0	-4.49897e-06	0	[- 0]	ChloroplastPheExchange	0	0	-3.40318e-14	0	0
chloroplastphosphateexchange	2.22027e-13	1.30537e-14	-8.54598e-14	-8.54598e-14	0	chloroplastphosphateexchange	5.11519e-13	-8.99976e-15	2.64763e-13	2.64763e-13	0	chloroplastphosphateexchange	6.01529e-13	-1.74574e-14	2.11527e-13	6.01529e-13	0	chloroplastphosphateexchange	-1.55913e-13	4.91996e-15	6.58237e-14	6.58237e-14	0	chloroplastphosphateexchange	-2.80979e-13	1.21795e-13	-9.08757e-14	-9.08757e-14	0	chloroplastphosphateexchange	4.84688e-13	6.2765e-14	3.47454e-13	4.84688e-13	0
chloroplastprotonexchange	1.2931	1.2931	1.2931	1.2931	+	chloroplastprotonexchange	8.52568	0	-30.0662	17.654	[- +]	chloroplastprotonexchange	17.6539	1.62681	1.62681	17.6539	[+ +]	chloroplastprotonexchange	-25.6034	-16.8103	-25.6034	-5.60345	[- -]	chloroplastprotonexchange	-18.3966	-0.488622	-40.5936	7.78165	[- +]	chloroplastprotonexchange	-8.46538	3.19478e-28	-28.6943	7.78131	[- +]
chloroplastpyruvateexchange	-1.44566e-13	1.00414e-11	-8.48167e-13	5.87604e-12	0	chloroplastpyruvateexchange	-7.92316	1.1999e-26	-15.8466	31.8736	[- +]	chloroplastpyruvateexchange	-2.60033e-13	16.0271	-9.93204e-12	16.0271	[0 +]	chloroplastpyruvateexchange	-8.04018e-13	-4.31617e-29	5.40819e-13	1.36374e-11	0	chloroplastpyruvateexchange	5.94897	8.7219	-5.94975	22.1964	[- +]	chloroplastpyruvateexchange	16.2467	7.78131	-1.25371e-11	16.2467	[0 +]
chloroplastSAMexchange	5.752e-14	0	0	-4.02945e-14	0	chloroplastSAMexchange	0	-3.8907e-16	-1.14836e-27	2.81924e-06	[0 +]	chloroplastSAMexchange	4.44505e-14	0	2.98382e-32	-9.43865e-14	0	chloroplastSAMexchange	0	0	9.42259e-41	-1.07867e-13	0	chloroplastSAMexchange	0	0	0	6.63782e-06	[0 +]	chloroplastSAMexchange	0	0	0	-1.73969e-13	0
ChloroplastSerExchange	0	0	0	2.40296e-14	0	ChloroplastSerExchange	0	7.78121e-16	0	2.81924e-06	[0 +]	ChloroplastSerExchange	0	0	0	-5.05105e-14	0	ChloroplastSerExchange	0	0	0	-1.07867e-13	0	ChloroplastSerExchange	0	0	0	6.63782e-06	[0 +]	ChloroplastSerExchange	0	0	0	-3.46663e-13	0
ChloroplastStearicAcidExchange	0	-3.39461e-33	0	1.51639e-13	0	ChloroplastStearicAcidExchange	0	0	0	4.28524e-06	[0 +]	ChloroplastStearicAcidExchange	0	-5.24095e-31	0	4.83956e-14	0	ChloroplastStearicAcidExchange	-1.28107e-31	0	0	5.9654e-14	0	ChloroplastStearicAcidExchange	0	0	-1.98747e-21	6.69268e-06	[0 +]	ChloroplastStearicAcidExchange	0	0	0	1.89309e-13	0
chloroplastsulfatetateexchange	0	0	0	1.40945e-13	0	chloroplastsulfatetateexchange	0	0	0	2.81924e-06	[0 +]	chloroplastsulfatetateexchange	0	0	0	1.45492e-13	0	chloroplastsulfatetateexchange	0	0	0	-1.07867e-13	0	chloroplastsulfatetateexchange	0	0	0	6.63782e-06	[0 +]	chloroplastsulfatetateexchange	0	0	0	-1.73969e-13	0
chloroplastthreonineexchange	0	0	-1.8255e-13	0	0	chloroplastthreonineexchange	0	-1.16723e-15	-4.46379e-06	0	[- 0]	chloroplastthreonineexchange	0	0	2.34489e-13	0	0	chloroplastthreonineexchange	0	0	9.09232e-14	0	0	chloroplastthreonineexchange	0	0	-1.03822e-05	0	[- 0]	chloroplastthreonineexchange	0	0	2.07455e-13	0	0
chloroplastTPTDHAPexchange	-966.667	-8.33333	-966.667	982.04	[- +]	chloroplastTPTDHAPexchange	83.1479	0	-966.741	999.397	[- +]	chloroplastTPTDHAPexchange	-966.741	-0.602521	-966.741	995.963	[- +]	chloroplastTPTDHAPexchange	-946.667	-8.33333	-946.667	978.937	[- +]	chloroplastTPTDHAPexchange	-946.056	-0.610778	-946.056	999.389	[- +]	chloroplastTPTDHAPexchange	-946.056	-0.610778	-946.056	995.908	[- +]
chloroplastTPTG3Pexchange	1000	1.2931	-965.805	1000	[- +1000]	chloroplastTPTG3Pexchange	1000	6.42229e-15	-997.048	1000	[- +1000]	chloroplastTPTG3Pexchange	1000	1.28212e-28	-981.201	1000	[- +1000]	chloroplastTPTG3Pexchange	1000	4.39655	-943.736	1000	[- +1000]	chloroplastTPTG3Pexchange	997.532	5.02059	-972.614	1000	[- +1000]	chloroplastTPTG3Pexchange	1000	4.1655	-960.715	1000	[- +1000]
chloroplastTPTGAPexchange	50	-9.62644	-1000	948.707	[-1000 +]	chloroplastTPTGAPexchange	-1000	-0.602521	-1000	994.397	[-1000 +]	chloroplastTPTGAPexchange	49.8888	-3.43437	-1000	962.704	[-1000 +]	chloroplastTPTGAPexchange	925.603	-12.7299	-1000	925.603	[-1000 +]	chloroplastTPTGAPexchange	931.666	-11.4582	-1000	953.863	[-1000 +]	chloroplastTPTGAPexchange	80.9158	-11.9468	-1000	941.964	[-1000 +]
ChloroplastTrpExchange	0	0	0	0	0	ChloroplastTrpExchange	0	0	0	0	0	ChloroplastTrpExchange	0	0	0	0	0	ChloroplastTrpExchange	0	0	0	0	0	ChloroplastTrpExchange	0	0	0	0	0	ChloroplastTrpExchange	0	0	0	0	0
ChloroplastTyrExchange	0	0	1.44137e-13	0	0	ChloroplastTyrExchange	0	-5.68579e-15	-2.32894e-06	-1.13197e-29	[- 0]	ChloroplastTyrExchange	0	0	-5.91599e-14	0	0	ChloroplastTyrExchange	0	0	-1.54959e-14	2.03493e-41	0	ChloroplastTyrExchange	0	0	-4.62751e-06	0	[- 0]	ChloroplastTyrExchange	0	0	-1.10139e-13	0	0
chloroplastvalineexchange	0	0	3.27819e-13	0	0	chloroplastvalineexchange	0	-1.55629e-15	-3.34785e-06	-8.45375e-26	[- 0]	chloroplastvalineexchange	0	0	-1.04879e-14	0	0	chloroplastvalineexchange	0	0	1.2774e-13	0	0	chloroplastvalineexchange	0	0	-6.98115e-06	0	[- 0]	chloroplastvalineexchange	0	0	9.60177e-14	0	0
chloroplastwaterexchange	-67.0977	32.9023	-965.805	1000	[- +1000]	chloroplastwaterexchange	-68.3862	25.7879	-968.609	1000	[- +1000]	chloroplastwaterexchange	-68.3862	18.7987	-968.609	1000	[- +1000]	chloroplastwaterexchange	-943.736	51.8678	-943.736	1000	[- +1000]	chloroplastwaterexchange	-947.95	46.358	-947.95	1000	[- +1000]	chloroplastwaterexchange	-99.6667	43.5851	-947.95	1000	[- +1000]
CholineKinase	-2.52815e-16	0	0	0	0	CholineKinase	7.10266e-17	1.39192e-15	0	4.3198e-07	0	CholineKinase	-1.77596e-16	0	0	0	0	CholineKinase	0	0	0	2.37922e-14	0	CholineKinase	0	0	0	8.18821e-07	0	CholineKinase	0	0	0	1.73365e-14	0
Cholinephosphatecytidylyltransferase	-2.52815e-16	0	0	0	0	Cholinephosphatecytidylyltransferase	7.10266e-17	1.39192e-15	0	4.3198e-07	0	Cholinephosphatecytidylyltransferase	-1.77596e-16	0	0	0	0	Cholinephosphatecytidylyltransferase	0	0	0	2.37922e-14	0	Cholinephosphatecytidylyltransferase	0	0	0	8.18821e-07	0	Cholinephosphatecytidylyltransferase	0	0	0	1.73365e-14	0
CholineSynthesis	-2.52815e-16	0	0	0	0	CholineSynthesis	7.10266e-17	1.39192e-15	0	4.3198e-07	0	CholineSynthesis	-1.77596e-16	0	0	0	0	CholineSynthesis	0	0	0	2.37922e-14	0	CholineSynthesis	0	0	0	8.18821e-07	0	CholineSynthesis	0	0	0	1.73365e-14	0
ChorismatemutRxnChloroplast	0	0	0	0	0	ChorismatemutRxnChloroplast	0	8.0202e-15	0	2.32894e-06	[0 +]	ChorismatemutRxnChloroplast	0	0	0	5.91599e-14	0	ChorismatemutRxnChloroplast	0	0	0	1.54959e-14	0	ChorismatemutRxnChloroplast	0	0	0	4.62751e-06	[0 +]	ChorismatemutRxnChloroplast	0	0	0	1.10139e-13	0
ChorismateSynthaseRxnChloroplast	0	0	0	0	0	ChorismateSynthaseRxnChloroplast	0	8.0202e-15	0	2.32894e-06	[0 +]	ChorismateSynthaseRxnChloroplast	0	0	0	5.91599e-14	0	ChorismateSynthaseRxnChloroplast	0	0	0	1.54959e-14	0	ChorismateSynthaseRxnChloroplast	0	0	0	4.62751e-06	[0 +]	ChorismateSynthaseRxnChloroplast	0	0	0	1.10139e-13	0
CitrateSynthasePeroxisome	-6.18898e-24	1.03561e-32	0	0	0	CitrateSynthasePeroxisome	0	0	0	2.85683e-05	[0 +]	CitrateSynthasePeroxisome	1.17918e-27	0	0	6.82239e-13	0	CitrateSynthasePeroxisome	0	3.92969e-15	0	0	0	CitrateSynthasePeroxisome	0	0	0	4.40715e-05	[0 +]	CitrateSynthasePeroxisome	0	0	0	2.42575e-13	0
CITSYNRXNmitochondrion	1.44819e-13	0	0	0	0	CITSYNRXNmitochondrion	1.0957e-13	0	0	5.35655e-05	[0 +]	CITSYNRXNmitochondrion	-5.06193e-25	0	0	4.427e-13	0	CITSYNRXNmitochondrion	4.74711e-13	0	0	1.98912e-12	0	CITSYNRXNmitochondrion	1.09349e-13	4.3732e-15	0	5.78438e-05	[0 +]	CITSYNRXNmitochondrion	1.07133e-13	4.75876e-15	0	7.68554e-13	0
CMPKIRXN	0	0	0	0	0	CMPKIRXN	7.10266e-17	1.30341e-15	0	7.92328	[0 +]	CMPKIRXN	-1.77596e-16	0	0	0	0	CMPKIRXN	0	0	0	5.68081e-12	0	CMPKIRXN	0	0	5.36348e-17	2.97488	[0 +]	CMPKIRXN	3.33993e-17	0	3.33993e-17	4.132e-12	0
CMPKIRXNChloroplast	0	0	0	0	0	CMPKIRXNChloroplast	0	0	0	0	0	CMPKIRXNChloroplast	0	0	0	0	0	CMPKIRXNChloroplast	0	0	0	0	0	CMPKIRXNChloroplast	0	0	0	0	0	CMPKIRXNChloroplast	0	0	0	0	0
CombinedBiomassReaction	0	0	0	0	0	CombinedBiomassReaction	0	2.13638e-11	0	0.00064837	[0 +]	CombinedBiomassReaction	0	0	0	0	0	CombinedBiomassReaction	0	0	0	0	0	CombinedBiomassReaction	0	0	0	0.00118363	[0 +]	CombinedBiomassReaction	0	0	0	1.66287e-13	0
ComplexIIImodmitochondrion	0.862069	0.862069	0.862069	0.862069	+	ComplexIIImodmitochondrion	0	-1.33933e-15	7.59705e-25	5.35655e-05	[0 +]	ComplexIIImodmitochondrion	-1.10377e-12	1.42414e-12	0	0	0	ComplexIIImodmitochondrion	2.93103	2.93103	2.93103	2.93103	+	ComplexIIImodmitochondrion	0	0	0	0.000161963	[0 +]	ComplexIIImodmitochondrion	-5.3585e-12	-5.55418e-12	0	0	0
ComplexIImodmitochondrion	5.13576e-24	-1.21734e-16	0	0	0	ComplexIImodmitochondrion	0	-3.34832e-15	0	5.35655e-05	[0 +]	ComplexIImodmitochondrion	-2.51046e-13	0	0	1.44074e-12	0	ComplexIImodmitochondrion	0	0	0	2.71847e-12	0	ComplexIImodmitochondrion	0	0	0	5.78438e-05	[0 +]	ComplexIImodmitochondrion	0	0	0	1.5804e-12	0
ComplexImodmitochondrion	0.862069	0.862069	0.862069	0.862069	+	ComplexImodmitochondrion	0	2.00899e-15	0	5.35655e-05	[0 +]	ComplexImodmitochondrion	-8.52723e-13	1.42414e-12	0	0	0	ComplexImodmitochondrion	2.93103	2.93103	2.93103	2.93103	+	ComplexImodmitochondrion	0	0	0	0.000161963	[0 +]	ComplexImodmitochondrion	-5.3585e-12	-5.55418e-12	0	0	0
ComplexIVmodmitochondrion	0.431034	0.431034	0.431034	0.431034	+	ComplexIVmodmitochondrion	0	-6.69664e-16	3.79909e-25	2.67828e-05	[0 +]	ComplexIVmodmitochondrion	-5.51885e-13	7.12072e-13	0	0	0	ComplexIVmodmitochondrion	1.46552	1.46552	1.46552	1.46552	+	ComplexIVmodmitochondrion	0	0	0	8.09814e-05	[0 +]	ComplexIVmodmitochondrion	-2.67925e-12	-2.77709e-12	0	0	0
ComplexVmodmitochondrion	2.87356	2.87356	2.87356	2.87356	+	ComplexVmodmitochondrion	0	0	0	0.000178552	[0 +]	ComplexVmodmitochondrion	-3.3445e-12	4.74715e-12	0	0	0	ComplexVmodmitochondrion	9.77011	9.77011	9.77011	9.77011	+	ComplexVmodmitochondrion	0	0	0	0.000539876	[0 +]	ComplexVmodmitochondrion	-1.78617e-11	-1.85139e-11	0	0	0
ConiferylAlcohol5Hydroxylase	0	0	0	0	0	ConiferylAlcohol5Hydroxylase	0	0	0	7.13093e-08	0	ConiferylAlcohol5Hydroxylase	0	0	0	1.8985e-17	0	ConiferylAlcohol5Hydroxylase	0	0	0	0	0	ConiferylAlcohol5Hydroxylase	0	0	0	1.30179e-07	0	ConiferylAlcohol5Hydroxylase	0	0	0	1.82887e-17	0
CTPSYNRXN	-2.52815e-16	-4.86934e-16	0	0	0	CTPSYNRXN	0	-1.58671e-29	0	0	0	CTPSYNRXN	0	0	0	0	0	CTPSYNRXN	0	-4.50361e-16	0	0	0	CTPSYNRXN	0	0	0	0	0	CTPSYNRXN	-3.33993e-17	0	0	0	0
CyclicElectronFlowPSImodchloroplast	0	0	0	0	0	CyclicElectronFlowPSImodchloroplast	0	0	0	0.000116584	[0 +]	CyclicElectronFlowPSImodchloroplast	0	0	0	0	0	CyclicElectronFlowPSImodchloroplast	0	0	0	6.45636e-12	0	CyclicElectronFlowPSImodchloroplast	0	0	0	0.000352507	[0 +]	CyclicElectronFlowPSImodchloroplast	0	0	0	0	0
CYSPHRXNChloroplast	5.752e-14	0	0	-4.02945e-14	0	CYSPHRXNChloroplast	0	-3.8907e-16	-1.48362e-28	2.81924e-06	[0 +]	CYSPHRXNChloroplast	4.44505e-14	0	2.98382e-32	-9.43865e-14	0	CYSPHRXNChloroplast	0	0	9.42259e-41	-1.07867e-13	0	CYSPHRXNChloroplast	0	0	-2.32241e-29	6.63782e-06	[0 +]	CYSPHRXNChloroplast	0	0	0	-1.73969e-13	0
CYSTATHIONINEBETALYASERXNChloroplast	5.752e-14	0	0	0	0	CYSTATHIONINEBETALYASERXNChloroplast	0	-3.8907e-16	0	2.81924e-06	[0 +]	CYSTATHIONINEBETALYASERXNChloroplast	4.44505e-14	0	2.98382e-32	0	0	CYSTATHIONINEBETALYASERXNChloroplast	0	0	0	0	0	CYSTATHIONINEBETALYASERXNChloroplast	0	0	0	6.63782e-06	[0 +]	CYSTATHIONINEBETALYASERXNChloroplast	0	0	0	0	0
CytochromeB5Reductase	0	0	-2.55515e-14	0	0	CytochromeB5Reductase	-2.53059	-2.53059	-2.5306	-2.53059	[- -]	CytochromeB5Reductase	-2.53059	-2.53059	-2.53059	-2.53059	-	CytochromeB5Reductase	0	0	-2.84607e-13	1.44905e-24	0	CytochromeB5Reductase	-2.56527	-2.56527	-2.56528	-2.56526	[- -]	CytochromeB5Reductase	-2.56527	-2.56527	-2.56527	-2.56527	-
CytochromeBF6Complexmodchloroplast	100.862	100.862	100.862	100.862	+	CytochromeBF6Complexmodchloroplast	100.862	100.862	100.862	100.862	[+ +]	CytochromeBF6Complexmodchloroplast	100.862	100.862	100.862	100.862	+	CytochromeBF6Complexmodchloroplast	162.931	162.931	162.931	162.931	+	CytochromeBF6Complexmodchloroplast	162.931	162.931	162.931	162.931	[+ +]	CytochromeBF6Complexmodchloroplast	162.931	162.931	162.931	162.931	+
DADPKINRXN	0	0	0	0	0	DADPKINRXN	0	0	0	0	0	DADPKINRXN	0	0	0	0	0	DADPKINRXN	0	0	0	0	0	DADPKINRXN	0	0	0	0	0	DADPKINRXN	0	0	0	0	0
DAG34c3FFAsink	0	0	0	0	0	DAG34c3FFAsink	0	0	0	4.95977e-07	0	DAG34c3FFAsink	0	0	0	3.07309e-14	0	DAG34c3FFAsink	0	0	0	3.42459e-14	0	DAG34c3FFAsink	0	0	0	9.37284e-07	0	DAG34c3FFAsink	0	0	0	2.12057e-14	0
DAG36c5FFAsink	0	0	0	0	0	DAG36c5FFAsink	0	0	0	4.61772e-07	0	DAG36c5FFAsink	0	0	0	8.16906e-15	0	DAG36c5FFAsink	0	0	0	1.89355e-14	0	DAG36c5FFAsink	0	0	0	8.78323e-07	0	DAG36c5FFAsink	0	0	0	2.71592e-14	0
DAG36c6FFAsink	0	0	0	0	0	DAG36c6FFAsink	0	0	0	4.57825e-07	0	DAG36c6FFAsink	0	0	0	8.75209e-15	0	DAG36c6FFAsink	0	0	0	0	0	DAG36c6FFAsink	0	0	0	8.73586e-07	0	DAG36c6FFAsink	0	0	0	5.47058e-16	0
DAGcPC16c0c16c0	0	0	1.94422e-13	-7.75541e-27	0	DAGcPC16c0c16c0	0	0	-2.3843	0	[- 0]	DAGcPC16c0c16c0	0	0	-0.120504	0	[- 0]	DAGcPC16c0c16c0	0	0	-1.60784e-12	0	0	DAGcPC16c0c16c0	-7.23025e-31	0	-0.97212	0	[- 0]	DAGcPC16c0c16c0	-0.0305389	3.37878e-33	-0.122156	8.36835e-34	[- 0]
DAGcPC16c0c18c1	-5.38131e-24	0	2.79154e-25	-1.32923e-14	0	DAGcPC16c0c18c1	0.180756	0	4.03861e-16	2.76303	[0 +]	DAGcPC16c0c18c1	0.241009	2.23438e-17	1.00918e-17	0.241009	[0 +]	DAGcPC16c0c18c1	0	0	2.292e-25	1.38374e-12	0	DAGcPC16c0c18c1	0.122156	0	2.19363e-28	1.35604	[0 +]	DAGcPC16c0c18c1	0.213772	8.33493e-17	-5.90935e-18	0.244311	[0 +]
DAGcPC16c0c18c2	-1.26035e-23	0	-3.4805e-13	-7.09019e-29	0	DAGcPC16c0c18c2	-0.180756	7.17951e-16	-2.5048	0	[- 0]	DAGcPC16c0c18c2	0	-4.28876e-32	-0.241009	0	[- 0]	DAGcPC16c0c18c2	0	0	-1.64139e-12	0	0	DAGcPC16c0c18c2	-0.122156	0	-1.09428	0	[- 0]	DAGcPC16c0c18c2	-0.183233	0	-0.244311	2.64272e-28	[- 0]
DAGcPC16c0c18c3	0	0	-8.42993e-13	-6.20984e-25	0	DAGcPC16c0c18c3	0	-4.89098e-17	-2.5048	0	[- 0]	DAGcPC16c0c18c3	-0.241009	2.79582e-32	-0.241009	1.57052e-27	[- 0]	DAGcPC16c0c18c3	0	0	-3.62179e-12	0	0	DAGcPC16c0c18c3	0	-8.42784e-17	-1.09428	0	[- 0]	DAGcPC16c0c18c3	0	3.99403e-32	-0.244311	0	[- 0]
DAGcPC18c1c18c1	1.23436e-23	0	-3.7572e-13	2.90992e-13	0	DAGcPC18c1c18c1	0.421765	0.602521	-1.74064	2.86632	[- +]	DAGcPC18c1c18c1	0.301261	0.602521	0.301261	0.602521	[+ +]	DAGcPC18c1c18c1	0	0	-1.78444e-12	2.42908e-12	0	DAGcPC18c1c18c1	0.488622	0.610778	-0.640724	1.46074	[- +]	DAGcPC18c1c18c1	0.397005	0.610778	0.305389	0.610778	[+ +]
DAGcPC18c1c18c2	-1.10065e-23	0	-7.32255e-13	-5.47412e-27	0	DAGcPC18c1c18c2	0	0	-2.3843	0	[- 0]	DAGcPC18c1c18c2	2.08203e-25	0	-0.120504	0	[- 0]	DAGcPC18c1c18c2	0	0	-2.44382e-12	-1.49141e-24	0	DAGcPC18c1c18c2	0	0	-0.97212	-1.52989e-24	[- 0]	DAGcPC18c1c18c2	0	0	-0.122156	0	[- 0]
DAGcPC18c1c18c3	0	0	-4.1495e-13	0	0	DAGcPC18c1c18c3	0	0	-2.3843	6.19704e-25	[- 0]	DAGcPC18c1c18c3	3.7447e-24	-1.4646e-32	-0.120504	3.7447e-24	[- 0]	DAGcPC18c1c18c3	0	0	-1.44438e-12	0	0	DAGcPC18c1c18c3	0	0	-0.97212	8.47852e-21	[- 0]	DAGcPC18c1c18c3	-0.122156	1.83075e-32	-0.122156	0	[- 0]
DAGcPC18c2c18c2	-8.66464e-25	0	-9.77971e-13	2.54926e-25	0	DAGcPC18c2c18c2	-9.29904e-31	-0.0602521	-2.20927	0	[- 0]	DAGcPC18c2c18c2	-0.180756	-0.120504	-0.180756	-3.72033e-24	[- 0]	DAGcPC18c2c18c2	0	0	-3.3894e-12	7.87006e-25	0	DAGcPC18c2c18c2	-3.41449e-31	-0.183233	-1.0332	-8.40513e-21	[- 0]	DAGcPC18c2c18c2	0	-0.0610778	-0.183233	0	[- 0]
DAGcPC18c2c18c3	1.09638e-23	0	-3.01794e-13	1.62369e-26	0	DAGcPC18c2c18c3	0	-4.89098e-17	-2.36325	6.92859e-25	[- 0]	DAGcPC18c2c18c3	-4.26657e-25	-0.120504	-0.361513	-4.26657e-25	[- 0]	DAGcPC18c2c18c3	0	0	-3.20837e-14	2.9767e-24	0	DAGcPC18c2c18c3	0	0	-1.21643	8.49255e-21	[- 0]	DAGcPC18c2c18c3	0	0	-0.366467	0	[- 0]
DAGcPC18c3c18c3	0	0	-9.87883e-13	4.14847e-26	0	DAGcPC18c3c18c3	-0.421765	-0.542269	-2.4235	-2.18117e-23	[- 0]	DAGcPC18c3c18c3	-0.120504	-0.361513	-0.542269	5.25663e-15	[- 0]	DAGcPC18c3c18c3	0	0	-2.22832e-12	-3.57288e-27	0	DAGcPC18c3c18c3	-0.488622	-0.427544	-1.33294	0	[- 0]	DAGcPC18c3c18c3	-0.27485	-0.5497	-0.5497	-2.16486e-14	[- 0]
DAGsink	0	0	0	0	0	DAGsink	0	4.27272e-13	0	1.29673e-05	[0 +]	DAGsink	0	0	0	0	0	DAGsink	0	0	0	0	0	DAGsink	0	0	0	2.36724e-05	[0 +]	DAGsink	0	0	0	3.32571e-15	0
DAHPSynRxnChloroplast	0	0	0	0	0	DAHPSynRxnChloroplast	0	8.0202e-15	0	2.32894e-06	[0 +]	DAHPSynRxnChloroplast	0	0	0	5.91599e-14	0	DAHPSynRxnChloroplast	0	0	0	1.54959e-14	0	DAHPSynRxnChloroplast	0	0	0	4.62751e-06	[0 +]	DAHPSynRxnChloroplast	0	0	0	1.10139e-13	0
DCDPKINRXN	0	0	0	0	0	DCDPKINRXN	0	0	0	0	0	DCDPKINRXN	0	0	0	0	0	DCDPKINRXN	0	0	0	0	0	DCDPKINRXN	0	0	0	0	0	DCDPKINRXN	0	0	0	0	0
DGAT16c0c16c0c16c0	0	0	0	0	0	DGAT16c0c16c0c16c0	0	0	0	2.34413	[0 +]	DGAT16c0c16c0c16c0	0	0	0	0.0803362	[0 +]	DGAT16c0c16c0c16c0	0	0	0	2.02823e-12	0	DGAT16c0c16c0c16c0	0	0	0	0.931401	[0 +]	DGAT16c0c16c0c16c0	0	0	0	0.081437	[0 +]
DGAT16c0c16c0c18c1	0	0	0	0	0	DGAT16c0c16c0c18c1	0	0	0	2.3843	[0 +]	DGAT16c0c16c0c18c1	0	0	0	0.120504	[0 +]	DGAT16c0c16c0c18c1	0	0	0	2.90079e-12	0	DGAT16c0c16c0c18c1	0	0	0	0.97212	[0 +]	DGAT16c0c16c0c18c1	0	0	0	0.122156	[0 +]
DGAT16c0c16c0c18c2	0	0	0	0	0	DGAT16c0c16c0c18c2	0	0	0	2.3843	[0 +]	DGAT16c0c16c0c18c2	0	0	0	0.120504	[0 +]	DGAT16c0c16c0c18c2	0	0	0	2.36859e-12	0	DGAT16c0c16c0c18c2	0	0	0	0.97212	[0 +]	DGAT16c0c16c0c18c2	0	0	0	0.122156	[0 +]
DGAT16c0c16c0c18c3	0	0	0	0	0	DGAT16c0c16c0c18c3	0	0	0	2.3843	[0 +]	DGAT16c0c16c0c18c3	0	0	0	0.120504	[0 +]	DGAT16c0c16c0c18c3	0	0	0	1.60784e-12	0	DGAT16c0c16c0c18c3	0	0	0	0.97212	[0 +]	DGAT16c0c16c0c18c3	0	0	0	0.122156	[0 +]
DGAT16c0c18c1c16c0	0	0	0	0	0	DGAT16c0c18c1c16c0	0	0	0	2.3843	[0 +]	DGAT16c0c18c1c16c0	0	0	0	0.120504	[0 +]	DGAT16c0c18c1c16c0	0	0	0	2.90079e-12	0	DGAT16c0c18c1c16c0	0	0	0	0.97212	[0 +]	DGAT16c0c18c1c16c0	0	0	0	0.122156	[0 +]
DGAT16c0c18c1c18c1	0	0	0	0	0	DGAT16c0c18c1c18c1	0	-1.30104e-32	0	2.32405	[0 +]	DGAT16c0c18c1c18c1	0	0	0	0.0602521	[0 +]	DGAT16c0c18c1c18c1	0	0	0	3.64778e-12	0	DGAT16c0c18c1c18c1	0	0	0	0.911042	[0 +]	DGAT16c0c18c1c18c1	0	0	0	0.0610778	[0 +]
DGAT16c0c18c1c18c2	0	0	0	0	0	DGAT16c0c18c1c18c2	0	0	0	2.3843	[0 +]	DGAT16c0c18c1c18c2	0	0	0	0.120504	[0 +]	DGAT16c0c18c1c18c2	0	0	0	0	0	DGAT16c0c18c1c18c2	0	0	0	0.97212	[0 +]	DGAT16c0c18c1c18c2	0	0	0	0.122156	[0 +]
DGAT16c0c18c1c18c3	0	0	0	0	0	DGAT16c0c18c1c18c3	0	0	0	2.3843	[0 +]	DGAT16c0c18c1c18c3	0	5.02235e-32	0	0.120504	[0 +]	DGAT16c0c18c1c18c3	0	0	0	1.1043e-12	0	DGAT16c0c18c1c18c3	0	-8.42784e-17	0	0.97212	[0 +]	DGAT16c0c18c1c18c3	0	0	0	0.122156	[0 +]
DGAT16c0c18c2c16c0	0	0	0	0	0	DGAT16c0c18c2c16c0	0	0	0	2.3843	[0 +]	DGAT16c0c18c2c16c0	0	-2.7462e-32	0	0.120504	[0 +]	DGAT16c0c18c2c16c0	0	0	0	3.04421e-12	0	DGAT16c0c18c2c16c0	0.122156	0	0	0.97212	[0 +]	DGAT16c0c18c2c16c0	0	0	0	0.122156	[0 +]
DGAT16c0c18c2c18c1	0	0	0	0	0	DGAT16c0c18c2c18c1	0	-7.17951e-16	0	2.3843	[0 +]	DGAT16c0c18c2c18c1	0	0	0	0.120504	[0 +]	DGAT16c0c18c2c18c1	0	0	0	0	0	DGAT16c0c18c2c18c1	0	0	0	0.97212	[0 +]	DGAT16c0c18c2c18c1	0	0	0	0.122156	[0 +]
DGAT16c0c18c2c18c2	1.26466e-23	0	0	0	0	DGAT16c0c18c2c18c2	0.180756	0	0	2.44455	[0 +]	DGAT16c0c18c2c18c2	0	4.68724e-32	0	0.180756	[0 +]	DGAT16c0c18c2c18c2	0	0	0	1.88968e-12	0	DGAT16c0c18c2c18c2	0	0	0	1.0332	[0 +]	DGAT16c0c18c2c18c2	0.183233	0	0	0.183233	[0 +]
DGAT16c0c18c2c18c3	-4.2683e-26	0	0	0	0	DGAT16c0c18c2c18c3	0	0	0	2.5048	[0 +]	DGAT16c0c18c2c18c3	0	0	0	0.241009	[0 +]	DGAT16c0c18c2c18c3	0	0	0	1.64139e-12	0	DGAT16c0c18c2c18c3	0	0	0	1.09428	[0 +]	DGAT16c0c18c2c18c3	0	0	0	0.244311	[0 +]
DGAT16c0c18c3c16c0	0	0	0	0	0	DGAT16c0c18c3c16c0	0	0	0	2.3843	[0 +]	DGAT16c0c18c3c16c0	0	0	0	0.120504	[0 +]	DGAT16c0c18c3c16c0	0	0	0	1.5801e-12	0	DGAT16c0c18c3c16c0	0	0	0	0.97212	[0 +]	DGAT16c0c18c3c16c0	0	0	0	0.122156	[0 +]
DGAT16c0c18c3c18c1	0	0	0	0	0	DGAT16c0c18c3c18c1	0	0	0	2.3843	[0 +]	DGAT16c0c18c3c18c1	0	-2.79582e-32	0	0.120504	[0 +]	DGAT16c0c18c3c18c1	0	0	0	1.08795e-12	0	DGAT16c0c18c3c18c1	0	8.42784e-17	0	0.97212	[0 +]	DGAT16c0c18c3c18c1	0	0	0	0.122156	[0 +]
DGAT16c0c18c3c18c2	0	0	0	0	0	DGAT16c0c18c3c18c2	0	0	0	2.5048	[0 +]	DGAT16c0c18c3c18c2	0	0	0	0.241009	[0 +]	DGAT16c0c18c3c18c2	0	0	0	9.53894e-13	0	DGAT16c0c18c3c18c2	0	0	0	1.09428	[0 +]	DGAT16c0c18c3c18c2	0	0	0	0.244311	[0 +]
DGAT16c0c18c3c18c3	0	0	0	0	0	DGAT16c0c18c3c18c3	0	0	0	2.5048	[0 +]	DGAT16c0c18c3c18c3	0.241009	0	0	0.241009	[0 +]	DGAT16c0c18c3c18c3	0	0	0	3.62179e-12	0	DGAT16c0c18c3c18c3	0	0	0	1.09428	[0 +]	DGAT16c0c18c3c18c3	0	0	0	0.244311	[0 +]
DGAT18c1c18c1c16c0	0	0	0	0	0	DGAT18c1c18c1c16c0	0	0	0	2.32405	[0 +]	DGAT18c1c18c1c16c0	0	0	0	0.0602521	[0 +]	DGAT18c1c18c1c16c0	0	0	0	1.14631e-12	0	DGAT18c1c18c1c16c0	0	0	0	0.911042	[0 +]	DGAT18c1c18c1c16c0	0	0	0	0.0610778	[0 +]
DGAT18c1c18c1c18c1	0	0	0	0	0	DGAT18c1c18c1c18c1	0	0	0	2.30396	[0 +]	DGAT18c1c18c1c18c1	0	0	0	0.0401681	[0 +]	DGAT18c1c18c1c18c1	0	0	0	6.76162e-13	0	DGAT18c1c18c1c18c1	0	0	0	0.890683	[0 +]	DGAT18c1c18c1c18c1	0	0	0	0.0407185	[0 +]
DGAT18c1c18c1c18c2	0	0	0	0	0	DGAT18c1c18c1c18c2	0	0	0	2.32405	[0 +]	DGAT18c1c18c1c18c2	0	0	0	0.0602521	[0 +]	DGAT18c1c18c1c18c2	0	0	0	3.91649e-12	0	DGAT18c1c18c1c18c2	0	0	0	0.911042	[0 +]	DGAT18c1c18c1c18c2	0	0	0	0.0610778	[0 +]
DGAT18c1c18c1c18c3	0	0	0	0	0	DGAT18c1c18c1c18c3	0	0	0	2.32405	[0 +]	DGAT18c1c18c1c18c3	0	0	0	0.0602521	[0 +]	DGAT18c1c18c1c18c3	0	0	0	2.75744e-13	0	DGAT18c1c18c1c18c3	0	0	0	0.911042	[0 +]	DGAT18c1c18c1c18c3	0	0	0	0.0610778	[0 +]
DGAT18c1c18c2c16c0	0	0	0	0	0	DGAT18c1c18c2c16c0	0	0	0	2.3843	[0 +]	DGAT18c1c18c2c16c0	0	0	0	0.120504	[0 +]	DGAT18c1c18c2c16c0	0	0	0	2.07889e-12	0	DGAT18c1c18c2c16c0	0	0	0	0.97212	[0 +]	DGAT18c1c18c2c16c0	0	0	0	0.122156	[0 +]
DGAT18c1c18c2c18c1	0	0	0	0	0	DGAT18c1c18c2c18c1	0	0	0	2.32405	[0 +]	DGAT18c1c18c2c18c1	0	0	0	0.0602521	[0 +]	DGAT18c1c18c2c18c1	0	0	0	3.91649e-12	0	DGAT18c1c18c2c18c1	0	0	0	0.911042	[0 +]	DGAT18c1c18c2c18c1	0	0	0	0.0610778	[0 +]
DGAT18c1c18c2c18c2	0	0	0	0	0	DGAT18c1c18c2c18c2	0	0	0	2.3843	[0 +]	DGAT18c1c18c2c18c2	0	0	0	0.120504	[0 +]	DGAT18c1c18c2c18c2	0	0	0	2.97087e-13	0	DGAT18c1c18c2c18c2	0	0	0	0.97212	[0 +]	DGAT18c1c18c2c18c2	0	0	0	0.122156	[0 +]
DGAT18c1c18c2c18c3	0	0	0	0	0	DGAT18c1c18c2c18c3	0	0	0	2.3843	[0 +]	DGAT18c1c18c2c18c3	0	0	0	0.120504	[0 +]	DGAT18c1c18c2c18c3	0	0	0	4.33106e-12	0	DGAT18c1c18c2c18c3	0	0	0	0.97212	[0 +]	DGAT18c1c18c2c18c3	0	0	0	0.122156	[0 +]
DGAT18c1c18c3c16c0	0	0	0	0	0	DGAT18c1c18c3c16c0	0	0	0	2.3843	[0 +]	DGAT18c1c18c3c16c0	0	-8.14649e-33	0	0.120504	[0 +]	DGAT18c1c18c3c16c0	0	0	0	1.68715e-12	0	DGAT18c1c18c3c16c0	0	0	0	0.97212	[0 +]	DGAT18c1c18c3c16c0	0	0	0	0.122156	[0 +]
DGAT18c1c18c3c18c1	0	0	0	0	0	DGAT18c1c18c3c18c1	0	0	0	2.32405	[0 +]	DGAT18c1c18c3c18c1	0	0	0	0.0602521	[0 +]	DGAT18c1c18c3c18c1	0	0	0	2.75744e-13	0	DGAT18c1c18c3c18c1	0	0	0	0.911042	[0 +]	DGAT18c1c18c3c18c1	0	4.07325e-33	0	0.0610778	[0 +]
DGAT18c1c18c3c18c2	0	0	0	0	0	DGAT18c1c18c3c18c2	0	0	0	2.3843	[0 +]	DGAT18c1c18c3c18c2	0	0	0	0.120504	[0 +]	DGAT18c1c18c3c18c2	0	0	0	7.7845e-13	0	DGAT18c1c18c3c18c2	0	0	0	0.97212	[0 +]	DGAT18c1c18c3c18c2	0	0	0	0.122156	[0 +]
DGAT18c1c18c3c18c3	0	0	0	0	0	DGAT18c1c18c3c18c3	0	0	0	2.3843	[0 +]	DGAT18c1c18c3c18c3	0	0	0	0.120504	[0 +]	DGAT18c1c18c3c18c3	0	0	0	1.0017e-12	0	DGAT18c1c18c3c18c3	0	0	0	0.97212	[0 +]	DGAT18c1c18c3c18c3	0	0	0	0.122156	[0 +]
DGAT18c2c18c2c16c0	-1.26579e-23	0	0	0	0	DGAT18c2c18c2c16c0	0	0	0	2.1691	[0 +]	DGAT18c2c18c2c16c0	0	0.120504	0	0.180756	[0 +]	DGAT18c2c18c2c16c0	0	0	0	1.03144e-12	0	DGAT18c2c18c2c16c0	0	0.0610778	0	1.0332	[0 +]	DGAT18c2c18c2c16c0	0	0.0610778	0	0.183233	[0 +]
DGAT18c2c18c2c18c1	0	0	0	0	0	DGAT18c2c18c2c18c1	0	0.0602521	0	2.12224	[0 +]	DGAT18c2c18c2c18c1	0	0	0	0.120504	[0 +]	DGAT18c2c18c2c18c1	0	0	0	2.79502e-12	0	DGAT18c2c18c2c18c1	0	0.122156	0	0.97212	[0 +]	DGAT18c2c18c2c18c1	0	0	0	0.122156	[0 +]
DGAT18c2c18c2c18c2	0	0	0	0	0	DGAT18c2c18c2c18c2	3.10619e-30	0	0	2.14902	[0 +]	DGAT18c2c18c2c18c2	4.14133e-24	0	0	0.120504	[0 +]	DGAT18c2c18c2c18c2	0	0	0	2.43421e-12	0	DGAT18c2c18c2c18c2	3.46673e-31	0	0	0.97212	[0 +]	DGAT18c2c18c2c18c2	0	0	0	0.122156	[0 +]
DGAT18c2c18c2c18c3	0	0	0	0	0	DGAT18c2c18c2c18c3	0	0	0	2.20927	[0 +]	DGAT18c2c18c2c18c3	0	0	0	0.180756	[0 +]	DGAT18c2c18c2c18c3	0	0	0	1.454e-12	0	DGAT18c2c18c2c18c3	0	0	0	1.0332	[0 +]	DGAT18c2c18c2c18c3	0	0	0	0.183233	[0 +]
DGAT18c2c18c3c16c0	0	0	0	0	0	DGAT18c2c18c3c16c0	0	0	0	2.21597	[0 +]	DGAT18c2c18c3c16c0	0	0	0	0.241009	[0 +]	DGAT18c2c18c3c16c0	0	0	0	2.31279e-13	0	DGAT18c2c18c3c16c0	0	0	0	1.09428	[0 +]	DGAT18c2c18c3c16c0	0	0	0	0.244311	[0 +]
DGAT18c2c18c3c18c1	0	0	0	0	0	DGAT18c2c18c3c18c1	0	0	0	2.12224	[0 +]	DGAT18c2c18c3c18c1	0	0.120504	0	0.120504	[0 +]	DGAT18c2c18c3c18c1	0	0	0	1.67805e-12	0	DGAT18c2c18c3c18c1	0	0	0	0.97212	[0 +]	DGAT18c2c18c3c18c1	0	0	0	0.122156	[0 +]
DGAT18c2c18c3c18c2	0	0	0	0	0	DGAT18c2c18c3c18c2	0	0	0	0	0	DGAT18c2c18c3c18c2	0	0	0	0	0	DGAT18c2c18c3c18c2	0	0	0	0	0	DGAT18c2c18c3c18c2	0	0	0	0	0	DGAT18c2c18c3c18c2	0	0	0	0	0
DGAT18c2c18c3c18c3	0	0	0	0	0	DGAT18c2c18c3c18c3	0	0	0	2.36325	[0 +]	DGAT18c2c18c3c18c3	0	0	0	0.361513	[0 +]	DGAT18c2c18c3c18c3	0	0	0	2.96336e-12	0	DGAT18c2c18c3c18c3	0	0	0	1.21643	[0 +]	DGAT18c2c18c3c18c3	0	0	0	0.366467	[0 +]
DGAT18c3c18c3c16c0	0	0	0	0	0	DGAT18c3c18c3c16c0	0	0.241009	0	2.18919	[0 +]	DGAT18c3c18c3c16c0	0	0.120504	0	0.241009	[0 +]	DGAT18c3c18c3c16c0	0	0	0	1.65743e-12	0	DGAT18c3c18c3c16c0	0	0.183233	0	1.09428	[0 +]	DGAT18c3c18c3c16c0	0	0.183233	0	0.244311	[0 +]
DGAT18c3c18c3c18c1	0	0	0	0	0	DGAT18c3c18c3c18c1	0	0.0602521	0	2.09546	[0 +]	DGAT18c3c18c3c18c1	0	0	0	0.120504	[0 +]	DGAT18c3c18c3c18c1	0	0	0	2.23444e-12	0	DGAT18c3c18c3c18c1	0	0	0	0.97212	[0 +]	DGAT18c3c18c3c18c1	0	0.122156	0	0.122156	[0 +]
DGAT18c3c18c3c18c2	0	0	0	0	0	DGAT18c3c18c3c18c2	0	0.241009	0	2.28291	[0 +]	DGAT18c3c18c3c18c2	0	0	0	0.361513	[0 +]	DGAT18c3c18c3c18c2	0	0	0	3.40959e-12	0	DGAT18c3c18c3c18c2	0.244311	0	0	1.19042	[0 +]	DGAT18c3c18c3c18c2	0	0.244311	0	0.366467	[0 +]
DGAT18c3c18c3c18c3	0	0	0	0	0	DGAT18c3c18c3c18c3	0.241009	0	0	2.28291	[0 +]	DGAT18c3c18c3c18c3	0.120504	0.241009	0	0.361513	[0 +]	DGAT18c3c18c3c18c3	0	0	0	2.35878e-12	0	DGAT18c3c18c3c18c3	0.122156	0.244311	0	1.19042	[0 +]	DGAT18c3c18c3c18c3	0.27485	0	0	0.366467	[0 +]
DGDPKINRXN	0	0	0	0	0	DGDPKINRXN	0	0	0	0	0	DGDPKINRXN	0	0	0	0	0	DGDPKINRXN	0	0	0	0	0	DGDPKINRXN	0	0	0	0	0	DGDPKINRXN	0	0	0	0	0
DIACYLGLYKINRXN	0	0	0	0	0	DIACYLGLYKINRXN	0	0	0	15.8466	[0 +]	DIACYLGLYKINRXN	0	0	0	0	0	DIACYLGLYKINRXN	0	0	0	1.83405e-11	0	DIACYLGLYKINRXN	0	0	0	5.94975	[0 +]	DIACYLGLYKINRXN	0	0	0	8.39917e-12	0
DiaminopimDecarbChloroplast	0	0	0	0	0	DiaminopimDecarbChloroplast	0	7.78121e-16	0	2.4348e-06	[0 +]	DiaminopimDecarbChloroplast	0	0	0	0	0	DiaminopimDecarbChloroplast	0	0	0	0	0	DiaminopimDecarbChloroplast	0	0	0	5.54667e-06	[0 +]	DiaminopimDecarbChloroplast	0	0	0	0	0
DiaminopimelateAminotransferaseChloroplast	0	0	0	0	0	DiaminopimelateAminotransferaseChloroplast	0	7.78121e-16	0	2.4348e-06	[0 +]	DiaminopimelateAminotransferaseChloroplast	0	0	0	0	0	DiaminopimelateAminotransferaseChloroplast	0	0	0	0	0	DiaminopimelateAminotransferaseChloroplast	0	0	0	5.54667e-06	[0 +]	DiaminopimelateAminotransferaseChloroplast	0	0	0	0	0
DiaminopimEpimChloroplast	0	0	0	0	0	DiaminopimEpimChloroplast	0	7.78121e-16	0	2.4348e-06	[0 +]	DiaminopimEpimChloroplast	0	0	0	0	0	DiaminopimEpimChloroplast	0	0	0	0	0	DiaminopimEpimChloroplast	0	0	0	5.54667e-06	[0 +]	DiaminopimEpimChloroplast	0	0	0	0	0
DihydrodipicolinateReductaseChloroplast	0	0	0	0	0	DihydrodipicolinateReductaseChloroplast	0	7.78121e-16	0	2.4348e-06	[0 +]	DihydrodipicolinateReductaseChloroplast	0	0	0	0	0	DihydrodipicolinateReductaseChloroplast	0	0	0	0	0	DihydrodipicolinateReductaseChloroplast	0	0	0	5.54667e-06	[0 +]	DihydrodipicolinateReductaseChloroplast	0	0	0	0	0
DihydrodipicSynChloroplast	0	0	0	0	0	DihydrodipicSynChloroplast	0	7.78121e-16	0	2.4348e-06	[0 +]	DihydrodipicSynChloroplast	0	0	0	0	0	DihydrodipicSynChloroplast	0	0	0	0	0	DihydrodipicSynChloroplast	0	0	0	5.54667e-06	[0 +]	DihydrodipicSynChloroplast	0	0	0	0	0
DIHYDROFOLATEREDUCTRXN	0	0	0	0	0	DIHYDROFOLATEREDUCTRXN	0	0	0	0	0	DIHYDROFOLATEREDUCTRXN	0	0	0	0	0	DIHYDROFOLATEREDUCTRXN	0	0	0	0	0	DIHYDROFOLATEREDUCTRXN	0	0	0	0	0	DIHYDROFOLATEREDUCTRXN	0	0	0	0	0
DIHYDROOROTRXN	0	0	0	0	0	DIHYDROOROTRXN	0	0	0	0	0	DIHYDROOROTRXN	0	0	0	0	0	DIHYDROOROTRXN	0	0	0	0	0	DIHYDROOROTRXN	0	0	0	0	0	DIHYDROOROTRXN	0	0	0	0	0
DihydroxyIsovalDehydratRXNChloroplast	8.44339e-26	0	0	0	0	DihydroxyIsovalDehydratRXNChloroplast	0	7.00323e-15	8.45053e-26	3.34785e-06	[0 +]	DihydroxyIsovalDehydratRXNChloroplast	0	0	0	1.04879e-14	0	DihydroxyIsovalDehydratRXNChloroplast	0	0	0	0	0	DihydroxyIsovalDehydratRXNChloroplast	0	0	0	6.98115e-06	[0 +]	DihydroxyIsovalDehydratRXNChloroplast	0	0	0	0	0
dihydroxymetvalDehydratRXNChloroplast	0	0	0	0	0	dihydroxymetvalDehydratRXNChloroplast	0	1.55629e-15	0	2.81924e-06	[0 +]	dihydroxymetvalDehydratRXNChloroplast	0	0	0	0	0	dihydroxymetvalDehydratRXNChloroplast	0	0	0	1.64171e-13	0	dihydroxymetvalDehydratRXNChloroplast	0	0	0	6.18178e-06	[0 +]	dihydroxymetvalDehydratRXNChloroplast	0	0	0	0	0
DIPHOSPHOMEVALONTEDECARBOXYLASERXN	-1.74276e-24	0	0	0	0	DIPHOSPHOMEVALONTEDECARBOXYLASERXN	0	0	0	0	0	DIPHOSPHOMEVALONTEDECARBOXYLASERXN	0	0	0	0	0	DIPHOSPHOMEVALONTEDECARBOXYLASERXN	0	0	0	0	0	DIPHOSPHOMEVALONTEDECARBOXYLASERXN	0	0	0	0	0	DIPHOSPHOMEVALONTEDECARBOXYLASERXN	0	0	0	0	0
DNAPolymerasemod	0	0	0	0	0	DNAPolymerasemod	0	0	0	0	0	DNAPolymerasemod	0	0	0	0	0	DNAPolymerasemod	0	0	0	0	0	DNAPolymerasemod	0	0	0	0	0	DNAPolymerasemod	0	0	0	0	0
DSERDEAMRXN	2.52815e-16	-1.3025e-16	0	0	0	DSERDEAMRXN	5.48931e-14	0	0	7.92328	[0 +]	DSERDEAMRXN	1.77596e-16	0	0	6.68861e-12	0	DSERDEAMRXN	0	-4.34118e-29	0	1.05723e-11	0	DSERDEAMRXN	0	4.11664	0	5.94975	[0 +]	DSERDEAMRXN	0	0	0	1.55076e-11	0
DTDPKINRXN	0	0	0	0	0	DTDPKINRXN	0	0	0	0	0	DTDPKINRXN	0	0	0	0	0	DTDPKINRXN	0	0	0	0	0	DTDPKINRXN	0	0	0	0	0	DTDPKINRXN	0	0	0	0	0
DTMPKIRXN	0	0	0	0	0	DTMPKIRXN	0	0	0	0	0	DTMPKIRXN	0	0	0	0	0	DTMPKIRXN	0	0	0	0	0	DTMPKIRXN	0	0	0	0	0	DTMPKIRXN	0	0	0	0	0
DUDPKINRXN	0	0	0	0	0	DUDPKINRXN	0	0	0	0	0	DUDPKINRXN	0	0	0	0	0	DUDPKINRXN	0	0	0	0	0	DUDPKINRXN	0	0	0	0	0	DUDPKINRXN	0	0	0	0	0
DUTPPYROPRXN	0	0	0	0	0	DUTPPYROPRXN	0	0	0	0	0	DUTPPYROPRXN	0	0	0	0	0	DUTPPYROPRXN	0	0	0	0	0	DUTPPYROPRXN	0	0	0	0	0	DUTPPYROPRXN	0	0	0	0	0
DXPREDISOMRXNChloroplast	0	0	0	0	0	DXPREDISOMRXNChloroplast	0	0	0	0	0	DXPREDISOMRXNChloroplast	0	0	0	0	0	DXPREDISOMRXNChloroplast	0	0	0	0	0	DXPREDISOMRXNChloroplast	0	0	0	0	0	DXPREDISOMRXNChloroplast	0	0	0	0	0
DXSRXNChloroplast	0	0	0	0	0	DXSRXNChloroplast	0	0	0	0	0	DXSRXNChloroplast	0	0	0	0	0	DXSRXNChloroplast	0	0	0	0	0	DXSRXNChloroplast	0	0	0	0	0	DXSRXNChloroplast	0	0	0	0	0
EC11134	-1.74171e-24	0	0	0	0	EC11134	0	0	0	0	0	EC11134	0	0	0	0	0	EC11134	0	0	0	0	0	EC11134	0	0	0	0	0	EC11134	0	0	0	0	0
EC11139	0	0	0	0	0	EC11139	0	0	0	15.8466	[0 +]	EC11139	0	0	0	1.8079e-11	0	EC11139	0	0	0	0	0	EC11139	0	0	0	5.94975	[0 +]	EC11139	0	0	0	1.26396e-11	0
EC11139chloroplast	0	0	0	0	0	EC11139chloroplast	6.71811	1.80756	0	15.8466	[0 +]	EC11139chloroplast	0	0	0	5.32571e-12	0	EC11139chloroplast	0	0	0	0	0	EC11139chloroplast	0	0	0	5.94975	[0 +]	EC11139chloroplast	0	0	0	0	0
EC1118	4.12852e-24	0	0	0	0	EC1118	0	0.602521	0	0.602521	[0 +]	EC1118	0.602521	0.602521	0.602521	0.602521	+	EC1118	2.88409e-28	0	0	3.42459e-14	0	EC1118	0	0.610778	0	0.610778	[0 +]	EC1118	0.610778	0.610778	0.610778	0.610778	+
EC1141336	0	0	0	0	0	EC1141336	0	-8.58526e-16	0	1.11078e-07	0	EC1141336	0	0	0	0	0	EC1141336	0	0	0	0	0	EC1141336	0	0	0	2.02779e-07	0	EC1141336	0	0	0	1.02943e-13	0
EC11812chloroplast	100.862	100.862	100.862	100.862	+	EC11812chloroplast	99.2955	99.2955	83.449	99.2955	[+ +]	EC11812chloroplast	99.2955	99.2955	99.2955	99.2955	+	EC11812chloroplast	152.931	157.328	152.931	162.931	[+ +]	EC11812chloroplast	151.229	161.343	145.279	161.343	[+ +]	EC11812chloroplast	161.343	161.343	151.229	161.343	[+ +]
EC12112Chloroplast	4.70795e-24	9.17341e-28	8.42611e-14	1.21027e-12	0	EC12112Chloroplast	0	0	-14.039	17.6541	[- +]	EC12112Chloroplast	1.80756	1.80756	1.80756	1.80756	+	EC12112Chloroplast	-1.28107e-30	4.64699e-32	-1.47946e-12	2.08152e-12	0	EC12112Chloroplast	1.83233	0	-4.11742	7.78208	[- +]	EC12112Chloroplast	1.83233	1.83233	1.83233	1.83233	+
EC12113Chloroplast	1000	101.293	101.293	1000	[+ +1000]	EC12113Chloroplast	1000	83.7505	53.6842	1000	[+ +1000]	EC12113Chloroplast	998.192	85.3773	85.3773	998.192	[+ +]	EC12113Chloroplast	154.397	154.397	154.397	1000	[+ +1000]	EC12113Chloroplast	147.417	146.929	125.22	1000	[+ +1000]	EC12113Chloroplast	998.168	145.585	137.12	998.168	[+ +]
EC1219	-1.44819e-13	0	0	0	0	EC1219	0	1.50468e-14	0	15.8466	[0 +]	EC1219	0	0	0	1.55472e-12	0	EC1219	0	4.39655	0	10	[0 +]	EC1219	0	11.4582	0	16.0642	[0 +]	EC1219	0	10.1145	0	10.1145	[0 +]
EC15120	5.70144e-14	0	0	0	0	EC15120	2.1308e-16	9.79637e-15	0	2.81924e-06	[0 +]	EC15120	4.40953e-14	0	0	6.60558e-14	0	EC15120	0	0	0	0	0	EC15120	0	0	0	6.63782e-06	[0 +]	EC15120	0	0	0	2.10537e-13	0
EC1849Chloroplast	0	0	0	0	0	EC1849Chloroplast	0	0	0	2.81924e-06	[0 +]	EC1849Chloroplast	0	0	0	1.45492e-13	0	EC1849Chloroplast	0	0	0	0	0	EC1849Chloroplast	0	0	0	6.63782e-06	[0 +]	EC1849Chloroplast	0	0	0	0	0
EC1851	0	0	0	0	0	EC1851	0	0	0	2.67828e-05	[0 +]	EC1851	0	0	0	2.26482e-14	0	EC1851	0	0	0	9.6561e-13	0	EC1851	0	0	0	8.09814e-05	[0 +]	EC1851	0	0	0	4.2771e-13	0
EC1851chloroplast	0	0	0	0	0	EC1851chloroplast	0	0	0	2.71496e-05	[0 +]	EC1851chloroplast	-1.22865e-28	0	0	1.07844e-12	0	EC1851chloroplast	0	0	0	1.51881e-12	0	EC1851chloroplast	0	0	0	8.20907e-05	[0 +]	EC1851chloroplast	0	0	0	0	0
EC231133	0	0	0	0	0	EC231133	0	0	0	1.11078e-07	0	EC231133	0	0	0	0	0	EC231133	0	0	0	0	0	EC231133	0	0	0	2.02779e-07	0	EC231133	0	0	0	1.02943e-13	0
EC231180	-2.90815e-26	-3.39461e-33	0	0	0	EC231180	1.80756	1.80756	1.80756	1.80757	[+ +]	EC231180	1.80756	1.80756	1.80756	1.80756	+	EC231180	-1.28107e-31	0	0	0	0	EC231180	1.83233	1.83233	1.83233	1.83234	[+ +]	EC231180	1.83233	1.83233	1.83233	1.83233	+
EC2338	0	0	0	0	0	EC2338	-5.71179e-16	0	0	0	0	EC2338	0	0	0	0	0	EC2338	0	0	0	0	0	EC2338	-1.71837e-16	0	0	0	0	EC2338	0	0	0	0	0
EC241123	0	0	0	0	0	EC241123	0	0	0	7.92328	[0 +]	EC241123	2.48391e-26	0	0	0	0	EC241123	0	0	0	1.07182e-11	0	EC241123	0	0	0	2.97488	[0 +]	EC241123	0	0	0	0	0
EC24146	0	0	0	0	0	EC24146	0	0	0	0	0	EC24146	0	0	0	0	0	EC24146	0	0	0	0	0	EC24146	0	0	0	0	0	EC24146	0	0	0	0	0
EC24182	0	0	0	0	0	EC24182	0	0	0	7.92328	[0 +]	EC24182	2.48394e-26	0	0	0	0	EC24182	0	0	0	1.07182e-11	0	EC24182	0	0	0	2.97488	[0 +]	EC24182	0	0	0	0	0
EC25119Chloroplast	0	0	0	0	0	EC25119Chloroplast	0	8.0202e-15	0	2.32894e-06	[0 +]	EC25119Chloroplast	0	0	0	5.91599e-14	0	EC25119Chloroplast	0	0	0	1.54959e-14	0	EC25119Chloroplast	0	0	0	4.62751e-06	[0 +]	EC25119Chloroplast	0	0	0	1.10139e-13	0
EC271148Chloroplast	0	0	0	0	0	EC271148Chloroplast	0	0	0	0	0	EC271148Chloroplast	0	0	0	0	0	EC271148Chloroplast	0	0	0	0	0	EC271148Chloroplast	0	0	0	0	0	EC271148Chloroplast	0	0	0	0	0
EC271150	0	0	0	0	0	EC271150	0	0	0	15.8466	[0 +]	EC271150	0	0	0	0	0	EC271150	0	0	0	1.83405e-11	0	EC271150	0	0	0	5.94975	[0 +]	EC271150	0	0	0	8.39917e-12	0
EC271159	0	0	0	0	0	EC271159	0	0	0	15.8466	[0 +]	EC271159	0	0	0	0	0	EC271159	0	0	0	1.83405e-11	0	EC271159	0	0	0	5.94975	[0 +]	EC271159	0	0	0	8.39917e-12	0
EC27190	4.16667	4.16667	4.16667	4.16667	+	EC27190	1.80756	1.80756	1.80756	9.73084	[+ +]	EC27190	1.80756	1.80756	1.80756	1.80756	+	EC27190	4.16667	4.16667	4.16667	4.16667	+	EC27190	1.83233	1.83233	1.83233	4.80721	[+ +]	EC27190	1.83233	1.83233	1.83233	1.83233	+
EC27422	0	0	0	0	0	EC27422	0	0	0	7.92328	[0 +]	EC27422	0	0	0	0	0	EC27422	0	0	0	9.16894e-12	0	EC27422	0	0	0	2.97488	[0 +]	EC27422	0	0	0	0	0
EC27713	0	0	0	0	0	EC27713	0	0	0	7.92328	[0 +]	EC27713	0	0	0	2.28513e-12	0	EC27713	0	-1.73902e-28	0	8.53599e-12	0	EC27713	0	0	0	2.97488	[0 +]	EC27713	0	0	0	5.46047e-12	0
EC27760Chloroplast	0	0	0	0	0	EC27760Chloroplast	0	0	0	0	0	EC27760Chloroplast	0	0	0	0	0	EC27760Chloroplast	0	0	0	0	0	EC27760Chloroplast	0	0	0	0	0	EC27760Chloroplast	0	0	0	0	0
EC27811	0	0	0	0	0	EC27811	0	0	0	0	0	EC27811	0	0	0	0	0	EC27811	0	0	0	0	0	EC27811	0	0	0	0	0	EC27811	0	0	0	0	0
EC31325	0	0	0	0	0	EC31325	0	0	0	15.8466	[0 +]	EC31325	-1.04816e-30	0	0	1.42074e-12	0	EC31325	0	0	0	1.89042e-11	0	EC31325	0	0	0	5.94975	[0 +]	EC31325	0	0	0	8.39917e-12	0
EC3529	5.752e-14	-3.65379e-32	0	0	0	EC3529	0	0	4.27323e-27	5.28219	[0 +]	EC3529	4.44505e-14	0	0	2.74675e-12	0	EC3529	0	0	0	6.08616e-12	0	EC3529	0	0	0	1.98325	[0 +]	EC3529	0	0	0	1.94684e-12	0
EC42159	-2.90928e-26	-3.39461e-33	-1.547e-25	6.60321e-14	0	EC42159	1.80756	1.80756	1.80756	1.80757	[+ +]	EC42159	1.80756	1.80756	1.80756	1.80756	+	EC42159	-1.28107e-31	0	-3.05906e-27	-4.34249e-15	0	EC42159	1.83233	1.83233	1.83233	1.83234	[+ +]	EC42159	1.83233	1.83233	1.83233	1.83233	+
EC51118	2.52815e-16	-1.3025e-16	0	0	0	EC51118	5.48931e-14	0	0	7.92328	[0 +]	EC51118	1.77596e-16	0	0	6.68861e-12	0	EC51118	0	0	0	1.05723e-11	0	EC51118	0	4.11664	0	5.94975	[0 +]	EC51118	0	0	0	1.55076e-11	0
EC51315	-1000	-4.16667	-1000	-4.16667	[-1000 -]	EC51315	-1000	-7.81236e-14	-1000	7.92328	[-1000 +]	EC51315	-1000	0	-1000	-2.11417e-12	[-1000 0]	EC51315	-1000	-4.16667	-1000	-4.16667	[-1000 -]	EC51315	-1000	0	-1000	2.97488	[-1000 +]	EC51315	-1000	0	-1000	4.13688e-12	[-1000 0]
EC51315chloroplast	0	0	0	0	0	EC51315chloroplast	0	0	0	0	0	EC51315chloroplast	0	0	0	0	0	EC51315chloroplast	0	0	0	0	0	EC51315chloroplast	0	0	0	0	0	EC51315chloroplast	0	0	0	0	0
EC62112	0	0	0	0	0	EC62112	0	0	0	1.37134e-07	0	EC62112	0	0	0	0	0	EC62112	0	0	0	0	0	EC62112	0	0	0	2.50345e-07	0	EC62112	0	0	0	1.02943e-13	0
EC62134	0	0	0	0	0	EC62134	0	0	0	1.11078e-07	0	EC62134	0	0	0	0	0	EC62134	0	0	0	0	0	EC62134	0	0	0	2.02779e-07	0	EC62134	0	0	0	2.84887e-17	0
EC63416	0	0	0	0	0	EC63416	0	0	0	0	0	EC63416	0	0	0	0	0	EC63416	0	0	0	0	0	EC63416	0	0	0	0	0	EC63416	0	0	0	0	0
ETHANOLAMINEKINASERXN	0	0	0	0	0	ETHANOLAMINEKINASERXN	7.10266e-17	1.39192e-15	0	4.3198e-07	0	ETHANOLAMINEKINASERXN	0	0	0	0	0	ETHANOLAMINEKINASERXN	0	0	0	1.38487e-14	0	ETHANOLAMINEKINASERXN	0	0	0	8.18821e-07	0	ETHANOLAMINEKINASERXN	0	0	0	1.73365e-14	0
Ethanolaminemethyltransferase	0	0	0	0	0	Ethanolaminemethyltransferase	7.10266e-17	1.39192e-15	0	4.3198e-07	0	Ethanolaminemethyltransferase	0	0	0	0	0	Ethanolaminemethyltransferase	0	0	0	1.38487e-14	0	Ethanolaminemethyltransferase	0	0	0	8.18821e-07	0	Ethanolaminemethyltransferase	0	0	0	1.73365e-14	0
F16ALDOLASERXN	-8.33333	-8.33333	-8.33333	-8.33333	-	F16ALDOLASERXN	4.42539e-14	-7.85558e-14	-4.46379e-06	-4.52358e-14	[- 0]	F16ALDOLASERXN	1.29822e-13	0	-4.25195e-14	1.29822e-13	0	F16ALDOLASERXN	-8.33333	-8.33333	-8.33333	-8.33333	-	F16ALDOLASERXN	4.40146e-14	0	-8.43556e-06	5.8816e-14	[- 0]	F16ALDOLASERXN	0	0	-2.68471e-13	0	0
F16ALDOLASERXNchloroplast	0	-16.6667	-33.3333	-7.64308e-12	[- 0]	F16ALDOLASERXNchloroplast	0	-16.6296	-38.5413	15.8466	[- +]	F16ALDOLASERXNchloroplast	0	-16.6296	-33.2592	-1.23036e-11	[- 0]	F16ALDOLASERXNchloroplast	0	-26.6667	-53.3333	1.14697e-11	[- 0]	F16ALDOLASERXNchloroplast	0	-26.9719	-53.944	5.94975	[- +]	F16ALDOLASERXNchloroplast	0	-26.9719	-53.9439	8.51432e-12	[- 0]
F16BDEPHOSRXN	12.5	12.5	12.5	12.5	+	F16BDEPHOSRXN	1.80756	1.80756	1.80756	17.6541	[+ +]	F16BDEPHOSRXN	1.80756	1.80756	1.80756	1.80756	+	F16BDEPHOSRXN	12.5	12.5	12.5	12.5	+	F16BDEPHOSRXN	1.83233	1.83233	1.83233	7.78208	[+ +]	F16BDEPHOSRXN	1.83233	1.83233	1.83233	1.83233	+
F16BDEPHOSRXNchloroplast	0	16.6667	0	33.3333	[0 +]	F16BDEPHOSRXNchloroplast	0	27.0532	0	49.1057	[0 +]	F16BDEPHOSRXNchloroplast	0	16.6296	0	33.2592	[0 +]	F16BDEPHOSRXNchloroplast	0	26.6667	0	53.3333	[0 +]	F16BDEPHOSRXNchloroplast	0	26.9719	0	59.8936	[0 +]	F16BDEPHOSRXNchloroplast	0	26.9719	0	53.9439	[0 +]
FAD16c0c18c1	0	0	0	0	0	FAD16c0c18c1	1.02429	0.241009	0	1.44605	[0 +]	FAD16c0c18c1	0	0	0	1.20504	[0 +]	FAD16c0c18c1	0	0	0	1.97991e-13	0	FAD16c0c18c1	0.977244	0.244311	0	1.46587	[0 +]	FAD16c0c18c1	0	-1.4646e-32	0	1.22156	[0 +]
FAD16c0c18c2	0	0	0	0	0	FAD16c0c18c2	0.662773	7.17951e-16	0	1.08454	[0 +]	FAD16c0c18c2	0.964034	-1.07219e-32	0	1.08454	[0 +]	FAD16c0c18c2	0	0	0	7.92255e-14	0	FAD16c0c18c2	0.610778	0.244311	0	1.0994	[0 +]	FAD16c0c18c2	0.82455	0	0	1.0994	[0 +]
FAD18c1c18c1	0	0	0	0	0	FAD18c1c18c1	0	0.602521	0	1.44605	[0 +]	FAD18c1c18c1	1.14479	0.84353	0	1.20504	[0 +]	FAD18c1c18c1	0	0	0	1.97991e-13	0	FAD18c1c18c1	0	0.610778	0	1.46587	[0 +]	FAD18c1c18c1	1.19102	0.855089	0	1.22156	[0 +]
FAD18c1c18c2	0	0	0	0	0	FAD18c1c18c2	0	0	0	1.08454	[0 +]	FAD18c1c18c2	0	0.723026	0	1.08454	[0 +]	FAD18c1c18c2	0	0	0	1.51818e-13	0	FAD18c1c18c2	0	0.427544	0	1.0994	[0 +]	FAD18c1c18c2	0	0.5497	0	1.0994	[0 +]
FAD18c1c18c3	0	0	0	0	0	FAD18c1c18c3	0	0	0	1.44605	[0 +]	FAD18c1c18c3	0.301261	0.482017	0	0.602521	[0 +]	FAD18c1c18c3	0	0	0	1.5361e-13	0	FAD18c1c18c3	0.488622	0.427544	0	1.46074	[0 +]	FAD18c1c18c3	0.27485	0.5497	0	0.610778	[0 +]
FAD18c2c18c1	0	0	0	0	0	FAD18c2c18c1	0.421765	0.602521	0	1.44605	[0 +]	FAD18c2c18c1	0	0.120504	0	0.602521	[0 +]	FAD18c2c18c1	0	0	0	7.58791e-14	0	FAD18c2c18c1	0	0.183233	0	1.46074	[0 +]	FAD18c2c18c1	0	0.0610778	0	0.610778	[0 +]
FAD18c2c18c2	0	0	0	0	0	FAD18c2c18c2	0	0.542269	0	1.08454	[0 +]	FAD18c2c18c2	0	0	0	1.08454	[0 +]	FAD18c2c18c2	0	0	0	9.70262e-14	0	FAD18c2c18c2	0	0	0	1.0994	[0 +]	FAD18c2c18c2	0	0	0	1.0994	[0 +]
FAD18c2c18c3	0	0	0	0	0	FAD18c2c18c3	0.421765	0.542269	0	1.08454	[0 +]	FAD18c2c18c3	0.120504	0.361513	0	0.542269	[0 +]	FAD18c2c18c3	0	0	0	0	0	FAD18c2c18c3	0.488622	0.427544	0	1.0994	[0 +]	FAD18c2c18c3	0.27485	0.5497	0	0.5497	[0 +]
FARNESYLTRANSTRANSFERASERXN	0	0	0	0	0	FARNESYLTRANSTRANSFERASERXN	0	0	0	0	0	FARNESYLTRANSTRANSFERASERXN	0	0	0	0	0	FARNESYLTRANSTRANSFERASERXN	0	0	0	0	0	FARNESYLTRANSTRANSFERASERXN	0	0	0	0	0	FARNESYLTRANSTRANSFERASERXN	0	0	0	0	0
FARNESYLTRANSTRANSFERASERXNChloroplast	0	0	0	0	0	FARNESYLTRANSTRANSFERASERXNChloroplast	0	0	0	0	0	FARNESYLTRANSTRANSFERASERXNChloroplast	0	0	0	0	0	FARNESYLTRANSTRANSFERASERXNChloroplast	0	0	0	0	0	FARNESYLTRANSTRANSFERASERXNChloroplast	0	0	0	0	0	FARNESYLTRANSTRANSFERASERXNChloroplast	0	0	0	0	0
FERREDOXINNITRITEREDUCTASERXN	0	0	0	0	0	FERREDOXINNITRITEREDUCTASERXN	0	0	0	7.93563e-06	[0 +]	FERREDOXINNITRITEREDUCTASERXN	0	0	0	6.92975e-14	0	FERREDOXINNITRITEREDUCTASERXN	0	0	0	3.60326e-14	0	FERREDOXINNITRITEREDUCTASERXN	0	-3.19055e-16	9.84579e-14	1.8943e-05	[0 +]	FERREDOXINNITRITEREDUCTASERXN	0	0	0	0	0
FGAMSYNRXN	0	0	0	0	0	FGAMSYNRXN	0	0	0	0	0	FGAMSYNRXN	0	0	0	0	0	FGAMSYNRXN	0	0	0	0	0	FGAMSYNRXN	0	0	0	0	0	FGAMSYNRXN	0	0	0	0	0
FPPSYNRXN	0	0	0	1.62599e-15	0	FPPSYNRXN	0	0	0	1.90068e-28	0	FPPSYNRXN	0	0	0	-3.13053e-14	0	FPPSYNRXN	0	0	0	-1.01338e-14	0	FPPSYNRXN	0	0	0	6.89166e-21	0	FPPSYNRXN	0	0	0	2.26297e-14	0
FPPSYNRXNChloroplast	0	0	0	0	0	FPPSYNRXNChloroplast	0	0	0	0	0	FPPSYNRXNChloroplast	0	0	0	0	0	FPPSYNRXNChloroplast	0	0	0	0	0	FPPSYNRXNChloroplast	0	0	0	0	0	FPPSYNRXNChloroplast	0	0	0	0	0
FRUCTOKINASERXN	0	0	0	0	0	FRUCTOKINASERXN	0	-5.75328e-16	0	15.8466	[0 +]	FRUCTOKINASERXN	-2.43421e-26	0	0	0	0	FRUCTOKINASERXN	0	0	0	1.50236e-11	0	FRUCTOKINASERXN	0	0	0	5.94975	[0 +]	FRUCTOKINASERXN	0	0	0	8.35008e-12	0
FUMHYDRRXNmitochondrion	5.07184e-24	9.43357e-30	0	0	0	FUMHYDRRXNmitochondrion	-2.26007e-14	-1.24504e-14	0	2.6411	[0 +]	FUMHYDRRXNmitochondrion	-2.51046e-13	0	0	8.61504e-13	0	FUMHYDRRXNmitochondrion	0	1.28126e-15	0	7.85276e-12	0	FUMHYDRRXNmitochondrion	0	0	0	0.991625	[0 +]	FUMHYDRRXNmitochondrion	0	0	0	2.26189e-12	0
GABATRANSAMRXN	0	0	0	0	0	GABATRANSAMRXN	-2.13388e-13	0	0	5.35655e-05	[0 +]	GABATRANSAMRXN	0	0	0	0	0	GABATRANSAMRXN	0	0	0	0	0	GABATRANSAMRXN	0	0	0	3.52093e-05	[0 +]	GABATRANSAMRXN	0	0	0	5.85869e-13	0
GALACTOKINRXN	0	1.21383e-29	0	0	0	GALACTOKINRXN	0	-4.37886e-15	0	7.92328	[0 +]	GALACTOKINRXN	2.48399e-26	0	0	0	0	GALACTOKINRXN	0	-1.60175e-28	0	1.07182e-11	0	GALACTOKINRXN	0	0	0	2.97488	[0 +]	GALACTOKINRXN	0	0	0	5.46739e-12	0
GalactoseTransfermod	0	0	0	0	0	GalactoseTransfermod	0	3.98078e-16	0	1.20813e-08	0	GalactoseTransfermod	0	0	0	0	0	GalactoseTransfermod	0	0	0	0	0	GalactoseTransfermod	0	0	0	2.2055e-08	0	GalactoseTransfermod	0	0	0	3.09848e-18	0
GALACTURIDYLYLTRANSRXN	0	0	0	0	0	GALACTURIDYLYLTRANSRXN	0	-7.81236e-14	0	7.92328	[0 +]	GALACTURIDYLYLTRANSRXN	0	0	0	0	0	GALACTURIDYLYLTRANSRXN	0	0	0	8.51311e-12	0	GALACTURIDYLYLTRANSRXN	0	0	0	2.97488	[0 +]	GALACTURIDYLYLTRANSRXN	0	0	0	5.46739e-12	0
GalacturonateTransfermod	0	0	0	0	0	GalacturonateTransfermod	0	3.98078e-16	0	1.20813e-08	0	GalacturonateTransfermod	0	0	0	0	0	GalacturonateTransfermod	0	0	0	0	0	GalacturonateTransfermod	0	0	0	2.2055e-08	0	GalacturonateTransfermod	0	0	0	3.09848e-18	0
GammaGlutamyltransferasemod	5.752e-14	0	0	0	0	GammaGlutamyltransferasemod	0	0	0	5.28219	[0 +]	GammaGlutamyltransferasemod	4.44505e-14	0	0	2.74675e-12	0	GammaGlutamyltransferasemod	0	0	0	6.08616e-12	0	GammaGlutamyltransferasemod	0	0	0	1.98325	[0 +]	GammaGlutamyltransferasemod	0	0	0	1.94684e-12	0
GAPOXNPHOSPHNRXN	900	1.2931	1.2931	900	[+ +]	GAPOXNPHOSPHNRXN	916.25	1.69019e-29	-28.2587	916.25	[- +]	GAPOXNPHOSPHNRXN	916.25	3.43437	3.43437	916.25	[+ +]	GAPOXNPHOSPHNRXN	4.39655	0	-5.60345	850	[- +]	GAPOXNPHOSPHNRXN	13.7791	0	-18.5323	864.53	[- +]	GAPOXNPHOSPHNRXN	864.53	1.83233	-6.63304	864.53	[- +]
GARTRXN	0	0	0	0	0	GARTRXN	0	0	0	0	0	GARTRXN	0	0	0	0	0	GARTRXN	0	0	0	0	0	GARTRXN	0	0	0	0	0	GARTRXN	0	0	0	0	0
GCVMULTIRXNmitochondrion	5.72672e-14	-1.3025e-16	0	0	0	GCVMULTIRXNmitochondrion	5.51772e-14	4.89819e-15	0	2.67828e-05	[0 +]	GCVMULTIRXNmitochondrion	4.42729e-14	0	1.72137e-13	9.45551e-13	0	GCVMULTIRXNmitochondrion	10	10	10	10	+	GCVMULTIRXNmitochondrion	10.1145	10.1145	10.1145	10.1145	[+ +]	GCVMULTIRXNmitochondrion	10.1145	10.1145	10.1145	10.1145	+
GDPKINRXN	0	0	0	4.36057e-12	0	GDPKINRXN	0	0	0	7.92328	[0 +]	GDPKINRXN	0	0	0	2.28513e-12	0	GDPKINRXN	0	-1.68386e-28	0	8.53599e-12	0	GDPKINRXN	0	0	0	2.97488	[0 +]	GDPKINRXN	0	0	0	5.46047e-12	0
GDPKINRXNChloroplast	0	0	0	3.56129e-13	0	GDPKINRXNChloroplast	0	7.78121e-16	0	2.4348e-06	[0 +]	GDPKINRXNChloroplast	0	0	0	-1.11653e-13	0	GDPKINRXNChloroplast	0	0	0	-1.24361e-13	0	GDPKINRXNChloroplast	0	0	0	5.43499e-06	[0 +]	GDPKINRXNChloroplast	0	0	0	-1.446e-13	0
GDPREDUCTRXN	0	0	0	0	0	GDPREDUCTRXN	0	0	0	0	0	GDPREDUCTRXN	0	0	0	0	0	GDPREDUCTRXN	0	0	0	0	0	GDPREDUCTRXN	0	0	0	0	0	GDPREDUCTRXN	0	0	0	0	0
GenericATPasemod	0	0	0	0	0	GenericATPasemod	0	0	0	15.8466	[0 +]	GenericATPasemod	0	0	0	0	0	GenericATPasemod	0	0	0	1.83405e-11	0	GenericATPasemod	0	0	0	5.94975	[0 +]	GenericATPasemod	0	0	0	8.39917e-12	0
GenericNADOxidasemod	0	0	0	0	0	GenericNADOxidasemod	0	0	0	5.35655e-05	[0 +]	GenericNADOxidasemod	0	0	0	1.74832e-12	0	GenericNADOxidasemod	0	0	0	4.75903e-12	0	GenericNADOxidasemod	0	0	0	0.000161963	[0 +]	GenericNADOxidasemod	0	0	0	0	0
GenericNADPOxidasemod	0	0	0	0	0	GenericNADPOxidasemod	0	0	0	5.35655e-05	[0 +]	GenericNADPOxidasemod	0	0	0	1.43448e-12	0	GenericNADPOxidasemod	0	0	0	2.52786e-12	0	GenericNADPOxidasemod	0	0	0	0.000161963	[0 +]	GenericNADPOxidasemod	0	0	0	0	0
GLU6PDEHYDROGRXN	0	0	0	0	0	GLU6PDEHYDROGRXN	0	0	0	0	0	GLU6PDEHYDROGRXN	0	0	0	0	0	GLU6PDEHYDROGRXN	0	0	0	0	0	GLU6PDEHYDROGRXN	0	0	0	0	0	GLU6PDEHYDROGRXN	0	0	0	0	0
GLU6PDEHYDROGRXNChloroplast	-3.43441e-24	0	0	0	0	GLU6PDEHYDROGRXNChloroplast	0	0	0	5.28219	[0 +]	GLU6PDEHYDROGRXNChloroplast	-1.21492e-25	0	0	0	0	GLU6PDEHYDROGRXNChloroplast	0	0	0	1.69955e-12	0	GLU6PDEHYDROGRXNChloroplast	0	0	0	0.000134969	[0 +]	GLU6PDEHYDROGRXNChloroplast	0	0	0	2.87488e-12	0
GLUC1PADENYLTRANSRXNchloroplast	0	0	0	0	0	GLUC1PADENYLTRANSRXNchloroplast	0	0	0	0	0	GLUC1PADENYLTRANSRXNchloroplast	0	0	0	0	0	GLUC1PADENYLTRANSRXNchloroplast	0	0	0	0	0	GLUC1PADENYLTRANSRXNchloroplast	0	0	0	0	0	GLUC1PADENYLTRANSRXNchloroplast	0	0	0	0	0
GLUC1PURIDYLTRANSRXN	4.16667	4.16667	4.16667	4.16667	+	GLUC1PURIDYLTRANSRXN	0	0	-7.92328	7.92328	[- +]	GLUC1PURIDYLTRANSRXN	2.42207e-26	0	-4.19167e-12	-5.78876e-12	0	GLUC1PURIDYLTRANSRXN	4.16667	4.16667	4.16667	4.16667	+	GLUC1PURIDYLTRANSRXN	0	0	-2.97488	2.97488	[- +]	GLUC1PURIDYLTRANSRXN	0	0	-5.46047e-12	-2.50475e-12	0
GlucomannanSynthasemod	0	0	0	0	0	GlucomannanSynthasemod	0	0	0	0	0	GlucomannanSynthasemod	0	0	0	0	0	GlucomannanSynthasemod	0	0	0	0	0	GlucomannanSynthasemod	0	0	0	0	0	GlucomannanSynthasemod	0	0	0	0	0
GlucoseTransfermod	0	0	0	0	0	GlucoseTransfermod	0	4.37885e-15	0	1.32893e-07	0	GlucoseTransfermod	0	0	0	0	0	GlucoseTransfermod	0	0	0	0	0	GlucoseTransfermod	0	0	0	2.42604e-07	0	GlucoseTransfermod	0	0	0	3.40831e-17	0
GlucuronateTransfermod	0	0	0	0	0	GlucuronateTransfermod	0	3.98078e-16	0	1.20813e-08	0	GlucuronateTransfermod	0	0	0	0	0	GlucuronateTransfermod	0	0	0	0	0	GlucuronateTransfermod	0	0	0	2.2055e-08	0	GlucuronateTransfermod	0	0	0	3.09848e-18	0
GlucuronoxylanSynthesismod	0	0	0	0	0	GlucuronoxylanSynthesismod	0	0	0	0	0	GlucuronoxylanSynthesismod	0	0	0	0	0	GlucuronoxylanSynthesismod	0	0	0	0	0	GlucuronoxylanSynthesismod	0	0	0	0	0	GlucuronoxylanSynthesismod	0	0	0	0	0
GLURSRXN	0	0	0	0	0	GLURSRXN	0	0	0	0	0	GLURSRXN	0	0	0	0	0	GLURSRXN	0	0	0	0	0	GLURSRXN	0	0	0	0	0	GLURSRXN	0	0	0	0	0
GLUTAMATEDEHYDROGENASERXN	-1.15293e-13	0	0	0	0	GLUTAMATEDEHYDROGENASERXN	-1.32671e-13	-1.9686e-14	0	15.8466	[0 +]	GLUTAMATEDEHYDROGENASERXN	0	0	0	9.1228e-12	0	GLUTAMATEDEHYDROGENASERXN	0	0	0	1.2661e-11	0	GLUTAMATEDEHYDROGENASERXN	0	0	0	5.94975	[0 +]	GLUTAMATEDEHYDROGENASERXN	0	0	0	1.28601e-11	0
GLUTAMATENACETYLTRANSFERASERXNChloroplast	0	1.21734e-16	0	0	0	GLUTAMATENACETYLTRANSFERASERXNChloroplast	-2.26007e-14	-9.88019e-15	0	2.64109	[0 +]	GLUTAMATENACETYLTRANSFERASERXNChloroplast	0	0	0	0	0	GLUTAMATENACETYLTRANSFERASERXNChloroplast	0	1.28126e-15	0	3.20499e-12	0	GLUTAMATENACETYLTRANSFERASERXNChloroplast	0	0	0	0.991625	[0 +]	GLUTAMATENACETYLTRANSFERASERXNChloroplast	0	0	0	2.26189e-12	0
GLUTAMATESYNRXN	0	0	0	0	0	GLUTAMATESYNRXN	0	0	0	7.92328	[0 +]	GLUTAMATESYNRXN	0	0	0	5.15394e-12	0	GLUTAMATESYNRXN	0	0	0	2.10152e-11	0	GLUTAMATESYNRXN	0	0	0	5.94975	[0 +]	GLUTAMATESYNRXN	0	0	0	8.02797e-12	0
GLUTAMATESYNTHASEFERREDOXINRXN	0	0	0	0	0	GLUTAMATESYNTHASEFERREDOXINRXN	0	1.77092e-27	0	15.8466	[0 +]	GLUTAMATESYNTHASEFERREDOXINRXN	0	0	0	9.01382e-12	0	GLUTAMATESYNTHASEFERREDOXINRXN	10	5.60345	0	10	[0 +]	GLUTAMATESYNTHASEFERREDOXINRXN	10.1145	0	0	16.0642	[0 +]	GLUTAMATESYNTHASEFERREDOXINRXN	0	0	0	10.1145	[0 +]
GLUTAMATESYNTHASENADHRXN	0	0	0	0	0	GLUTAMATESYNTHASENADHRXN	0	0	0	15.8466	[0 +]	GLUTAMATESYNTHASENADHRXN	0	0	0	0	0	GLUTAMATESYNTHASENADHRXN	0	0	0	10	[0 +]	GLUTAMATESYNTHASENADHRXN	0	2.77293	0	16.0642	[0 +]	GLUTAMATESYNTHASENADHRXN	0	0	0	10.1145	[0 +]
GLUTAMIDOTRANSRXNChloroplast	0	0	0	0	0	GLUTAMIDOTRANSRXNChloroplast	0	7.78121e-16	0	2.4348e-06	[0 +]	GLUTAMIDOTRANSRXNChloroplast	0	0	0	0	0	GLUTAMIDOTRANSRXNChloroplast	0	0	0	0	0	GLUTAMIDOTRANSRXNChloroplast	0	0	0	5.43499e-06	[0 +]	GLUTAMIDOTRANSRXNChloroplast	0	0	0	0	0
GLUTAMINESYNRXN	-2.52815e-16	-3.65201e-16	0	0	0	GLUTAMINESYNRXN	-2.26007e-14	-9.10207e-15	0	15.8466	[0 +]	GLUTAMINESYNRXN	6.36926e-26	0	0	0	0	GLUTAMINESYNRXN	10	5.60345	0	10	[0 +]	GLUTAMINESYNRXN	10.1145	2.77293	0	16.0642	[0 +]	GLUTAMINESYNRXN	-3.33993e-17	0	6.33333e-14	10.1145	[0 +]
GLUTATHIONEPEROXIDASERXN	0	0	0	0	0	GLUTATHIONEPEROXIDASERXN	0	0	0	2.67828e-05	[0 +]	GLUTATHIONEPEROXIDASERXN	0	0	0	3.13735e-13	0	GLUTATHIONEPEROXIDASERXN	0	0	0	9.6561e-13	0	GLUTATHIONEPEROXIDASERXN	0	0	0	8.09814e-05	[0 +]	GLUTATHIONEPEROXIDASERXN	0	0	0	4.2771e-13	0
GLUTATHIONEREDUCTNADPHRXN	0	0	0	0	0	GLUTATHIONEREDUCTNADPHRXN	0	0	0	2.67828e-05	[0 +]	GLUTATHIONEREDUCTNADPHRXN	0	0	0	7.6108e-14	0	GLUTATHIONEREDUCTNADPHRXN	0	0	0	9.6561e-13	0	GLUTATHIONEREDUCTNADPHRXN	0	0	0	8.09814e-05	[0 +]	GLUTATHIONEREDUCTNADPHRXN	0	0	0	4.2771e-13	0
GLUTATHIONEREDUCTNADPHRXNchloroplast	0	0	0	0	0	GLUTATHIONEREDUCTNADPHRXNchloroplast	0	0	0	2.71496e-05	[0 +]	GLUTATHIONEREDUCTNADPHRXNchloroplast	0	0	0	1.07844e-12	0	GLUTATHIONEREDUCTNADPHRXNchloroplast	0	0	0	1.51881e-12	0	GLUTATHIONEREDUCTNADPHRXNchloroplast	0	0	0	8.20907e-05	[0 +]	GLUTATHIONEREDUCTNADPHRXNchloroplast	0	0	0	0	0
GLUTATHIONESYNRXN	0	0	0	0	0	GLUTATHIONESYNRXN	0	0	0	5.28219	[0 +]	GLUTATHIONESYNRXN	0	0	0	0	0	GLUTATHIONESYNRXN	0	0	0	6.08616e-12	0	GLUTATHIONESYNRXN	0	0	0	1.98325	[0 +]	GLUTATHIONESYNRXN	0	0	0	1.94684e-12	0
GLUTCYSLIGRXN	0	0	0	0	0	GLUTCYSLIGRXN	0	0	0	5.28219	[0 +]	GLUTCYSLIGRXN	0	0	0	0	0	GLUTCYSLIGRXN	0	0	0	6.08616e-12	0	GLUTCYSLIGRXN	0	0	0	1.98325	[0 +]	GLUTCYSLIGRXN	0	0	0	1.94684e-12	0
GLUTDECARBOXRXN	1.13235e-23	0	0	0	0	GLUTDECARBOXRXN	-2.13388e-13	0	0	5.35655e-05	[0 +]	GLUTDECARBOXRXN	0	0	0	0	0	GLUTDECARBOXRXN	0	0	0	0	0	GLUTDECARBOXRXN	0	0	0	3.52093e-05	[0 +]	GLUTDECARBOXRXN	0	4.75876e-15	0	5.85869e-13	0
GLUTDEHYDRXN	0	1.04701e-16	0	0	0	GLUTDEHYDRXN	0	0	0	15.8466	[0 +]	GLUTDEHYDRXN	8.89009e-14	0	0	9.2662e-12	0	GLUTDEHYDRXN	1.45403e-13	4.39655	0	10	[0 +]	GLUTDEHYDRXN	0	11.4582	0	16.0642	[0 +]	GLUTDEHYDRXN	10.1145	10.1145	0	10.1145	[0 +]
GLUTKINRXN	0	0	0	0	0	GLUTKINRXN	0	0	0	7.92328	[0 +]	GLUTKINRXN	0	0	0	8.40304e-12	0	GLUTKINRXN	0	0	0	3.34617e-12	0	GLUTKINRXN	0	0	0	2.97488	[0 +]	GLUTKINRXN	0	0	0	8.04784e-12	0
GLUTRNAREDUCTRXN	0	0	0	0	0	GLUTRNAREDUCTRXN	0	0	0	0	0	GLUTRNAREDUCTRXN	0	0	0	0	0	GLUTRNAREDUCTRXN	0	0	0	0	0	GLUTRNAREDUCTRXN	0	0	0	0	0	GLUTRNAREDUCTRXN	0	0	0	0	0
GLUTSEMIALDEHYDROGRXN	0	0	0	0	0	GLUTSEMIALDEHYDROGRXN	0	0	0	7.92328	[0 +]	GLUTSEMIALDEHYDROGRXN	0	0	0	8.40304e-12	0	GLUTSEMIALDEHYDROGRXN	0	0	0	3.34617e-12	0	GLUTSEMIALDEHYDROGRXN	0	0	0	2.97488	[0 +]	GLUTSEMIALDEHYDROGRXN	0	0	0	8.04784e-12	0
GLY3KINRXNchloroplast	2.34997e-27	0	0	0	0	GLY3KINRXNchloroplast	0	0	0	2.85683e-05	[0 +]	GLY3KINRXNchloroplast	0	0	0	5.95506e-13	0	GLY3KINRXNchloroplast	10	10	10	10	+	GLY3KINRXNchloroplast	10.1145	5.99784	4.16472	16.0642	[+ +]	GLY3KINRXNchloroplast	10.1145	10.1145	10.1145	10.1145	+
GLYC3PDEHYDROGBIOSYNRXNGLYCEROL3PNADPDIHYDROXYACETONEPHOSPHATENADPHPROTON59	0	0	0	0	0	GLYC3PDEHYDROGBIOSYNRXNGLYCEROL3PNADPDIHYDROXYACETONEPHOSPHATENADPHPROTON59	0.602521	0	0	0.602521	[0 +]	GLYC3PDEHYDROGBIOSYNRXNGLYCEROL3PNADPDIHYDROXYACETONEPHOSPHATENADPHPROTON59	-3.49112e-13	0	0	9.76734e-13	0	GLYC3PDEHYDROGBIOSYNRXNGLYCEROL3PNADPDIHYDROXYACETONEPHOSPHATENADPHPROTON59	0	0	0	1.07983e-14	0	GLYC3PDEHYDROGBIOSYNRXNGLYCEROL3PNADPDIHYDROXYACETONEPHOSPHATENADPHPROTON59	0.610778	0	0	0.610778	[0 +]	GLYC3PDEHYDROGBIOSYNRXNGLYCEROL3PNADPDIHYDROXYACETONEPHOSPHATENADPHPROTON59	0	0	0	1.19776e-11	0
GLYCERATEDEHYDROGENASERXNperoxisome	2.34997e-27	5.12637e-32	0	0	0	GLYCERATEDEHYDROGENASERXNperoxisome	0	0	0	2.85683e-05	[0 +]	GLYCERATEDEHYDROGENASERXNperoxisome	0	0	0	5.95506e-13	0	GLYCERATEDEHYDROGENASERXNperoxisome	10	10	10	10	+	GLYCERATEDEHYDROGENASERXNperoxisome	10.1145	5.99784	4.16472	16.0642	[+ +]	GLYCERATEDEHYDROGENASERXNperoxisome	10.1145	10.1145	10.1145	10.1145	+
GlycerolKinase	-6.45166e-24	0	0	0	0	GlycerolKinase	0	0	0	2.26379	[0 +]	GlycerolKinase	1.46825e-24	0	0	6.33429e-13	0	GlycerolKinase	0	0	0	1.39126e-12	0	GlycerolKinase	0	0	0	0.849964	[0 +]	GlycerolKinase	3.29237e-28	0	3.29237e-28	1.25878e-12	0
GLYCINEAMINOTRANSFERASERXNperoxisome	0	0	0	0	0	GLYCINEAMINOTRANSFERASERXNperoxisome	0	0	0	2.85683e-05	[0 +]	GLYCINEAMINOTRANSFERASERXNperoxisome	0	0	0	8.62317e-13	0	GLYCINEAMINOTRANSFERASERXNperoxisome	10	10	10	10	+	GLYCINEAMINOTRANSFERASERXNperoxisome	10.1145	14.2311	4.16472	16.0642	[+ +]	GLYCINEAMINOTRANSFERASERXNperoxisome	10.1145	10.1145	10.1145	10.1145	+
GLYCOGENSYNRXNmodchloroplast	0	0	0	0	0	GLYCOGENSYNRXNmodchloroplast	0	0	0	0	0	GLYCOGENSYNRXNmodchloroplast	0	0	0	0	0	GLYCOGENSYNRXNmodchloroplast	0	0	0	0	0	GLYCOGENSYNRXNmodchloroplast	0	0	0	0	0	GLYCOGENSYNRXNmodchloroplast	0	0	0	0	0
GLYOHMETRANSRXN	5.70144e-14	-3.65379e-32	2.20488e-29	5.60788e-15	0	GLYOHMETRANSRXN	2.1308e-16	9.79637e-15	0	2.81924e-06	[0 +]	GLYOHMETRANSRXN	4.40953e-14	0	0	6.60558e-14	0	GLYOHMETRANSRXN	0	0	4.28193e-30	-1.92766e-13	0	GLYOHMETRANSRXN	0	0	2.7799e-28	6.63782e-06	[0 +]	GLYOHMETRANSRXN	0	0	0	2.10537e-13	0
GLYOHMETRANSRXNChloroplast	0	0	0	3.56129e-13	0	GLYOHMETRANSRXNChloroplast	0	7.78121e-16	0	2.4348e-06	[0 +]	GLYOHMETRANSRXNChloroplast	0	0	0	-1.11653e-13	0	GLYOHMETRANSRXNChloroplast	0	0	0	-1.24361e-13	0	GLYOHMETRANSRXNChloroplast	0	0	0	5.43499e-06	[0 +]	GLYOHMETRANSRXNChloroplast	0	0	0	-1.446e-13	0
GLYOHMETRANSRXNmitochondrion	-5.72672e-14	1.3025e-16	1.99265e-12	0	0	GLYOHMETRANSRXNmitochondrion	-5.51772e-14	-4.89819e-15	-2.67828e-05	0	[- 0]	GLYOHMETRANSRXNmitochondrion	-4.42729e-14	0	-9.45551e-13	-1.72137e-13	0	GLYOHMETRANSRXNmitochondrion	-10	-10	-10	-10	-	GLYOHMETRANSRXNmitochondrion	-10.1145	-10.1145	-10.1145	-10.1145	[- -]	GLYOHMETRANSRXNmitochondrion	-10.1145	-10.1145	-10.1145	-10.1145	-
GLYRIBONUCSYNRXN	0	0	0	0	0	GLYRIBONUCSYNRXN	0	0	0	0	0	GLYRIBONUCSYNRXN	0	0	0	0	0	GLYRIBONUCSYNRXN	0	0	0	0	0	GLYRIBONUCSYNRXN	0	0	0	0	0	GLYRIBONUCSYNRXN	0	0	0	0	0
GMPSYNGLUTRXN	0	1.1078e-30	0	0	0	GMPSYNGLUTRXN	0	-2.40962e-31	0	0	0	GMPSYNGLUTRXN	0	0	0	0	0	GMPSYNGLUTRXN	0	1.63404e-30	0	0	0	GMPSYNGLUTRXN	0	0	0	0	0	GMPSYNGLUTRXN	0	0	0	0	0
GPAT1	-5.37897e-24	0	0	0	0	GPAT1	0.180756	-1.18866e-32	4.03861e-16	2.76303	[0 +]	GPAT1	0.241009	2.23438e-17	0	0.241009	[0 +]	GPAT1	0	0	0	0	0	GPAT1	0.122156	-8.42784e-17	0	1.35604	[0 +]	GPAT1	0.213772	8.33493e-17	1.05882e-16	0.244311	[0 +]
GPAT2	1.23439e-23	0	0	0	0	GPAT2	0.421765	0.602521	0	2.86632	[0 +]	GPAT2	0.361513	0.602521	0.361513	0.602521	[+ +]	GPAT2	0	0	0	2.62725e-12	0	GPAT2	0.488622	0.610778	0	1.46074	[0 +]	GPAT2	0.397005	0.610778	0.366467	0.610778	[+ +]
GPHRXNchloroplast	0	0	0	0	0	GPHRXNchloroplast	0	0	0	0	0	GPHRXNchloroplast	0	0	0	0	0	GPHRXNchloroplast	20	20	20	20	+	GPHRXNchloroplast	20.229	20.229	20.2289	20.229	[+ +]	GPHRXNchloroplast	20.229	20.229	20.229	20.229	+
GPPSYNRXN	3.79963e-24	0	0	0	0	GPPSYNRXN	0	0	0	0	0	GPPSYNRXN	0	0	0	0	0	GPPSYNRXN	0	0	0	0	0	GPPSYNRXN	0	0	0	0	0	GPPSYNRXN	0	0	0	0	0
GPPSYNRXNChloroplast	0	0	0	0	0	GPPSYNRXNChloroplast	0	0	0	0	0	GPPSYNRXNChloroplast	0	0	0	0	0	GPPSYNRXNChloroplast	0	0	0	0	0	GPPSYNRXNChloroplast	0	0	0	0	0	GPPSYNRXNChloroplast	0	0	0	0	0
GSAAMINOTRANSRXN	0	0	0	0	0	GSAAMINOTRANSRXN	0	0	0	0	0	GSAAMINOTRANSRXN	0	0	0	0	0	GSAAMINOTRANSRXN	0	0	0	0	0	GSAAMINOTRANSRXN	0	0	0	0	0	GSAAMINOTRANSRXN	0	0	0	0	0
GUANPRIBOSYLTRANRXN	0	0	0	0	0	GUANPRIBOSYLTRANRXN	0	0	0	0	0	GUANPRIBOSYLTRANRXN	0	0	0	0	0	GUANPRIBOSYLTRANRXN	0	0	0	0	0	GUANPRIBOSYLTRANRXN	0	0	0	0	0	GUANPRIBOSYLTRANRXN	0	0	0	0	0
GUANYLKINRXN	0	1.1078e-30	0	0	0	GUANYLKINRXN	0	-2.40962e-31	0	0	0	GUANYLKINRXN	0	0	0	0	0	GUANYLKINRXN	0	1.6617e-30	0	0	0	GUANYLKINRXN	0	0	0	0	0	GUANYLKINRXN	0	0	0	0	0
HemicelluloseSink	0	0	0	0	0	HemicelluloseSink	0	5.76817e-12	0	0.000175058	[0 +]	HemicelluloseSink	0	0	0	0	0	HemicelluloseSink	0	0	0	0	0	HemicelluloseSink	0	0	0	0.000319577	[0 +]	HemicelluloseSink	0	0	0	4.4897e-14	0
HISTAMINOTRANSRXNChloroplast	0	0	0	0	0	HISTAMINOTRANSRXNChloroplast	0	7.78121e-16	0	2.4348e-06	[0 +]	HISTAMINOTRANSRXNChloroplast	0	0	0	0	0	HISTAMINOTRANSRXNChloroplast	0	0	0	0	0	HISTAMINOTRANSRXNChloroplast	0	0	0	5.43499e-06	[0 +]	HISTAMINOTRANSRXNChloroplast	0	0	0	0	0
HISTCYCLOHYDRXNChloroplast	0	0	0	0	0	HISTCYCLOHYDRXNChloroplast	0	7.78121e-16	0	2.4348e-06	[0 +]	HISTCYCLOHYDRXNChloroplast	0	0	0	0	0	HISTCYCLOHYDRXNChloroplast	0	0	0	0	0	HISTCYCLOHYDRXNChloroplast	0	0	0	5.43499e-06	[0 +]	HISTCYCLOHYDRXNChloroplast	0	0	0	0	0
HISTIDPHOSRXNChloroplast	0	0	0	0	0	HISTIDPHOSRXNChloroplast	0	7.78121e-16	0	2.4348e-06	[0 +]	HISTIDPHOSRXNChloroplast	0	0	0	0	0	HISTIDPHOSRXNChloroplast	0	0	0	0	0	HISTIDPHOSRXNChloroplast	0	0	0	5.43499e-06	[0 +]	HISTIDPHOSRXNChloroplast	0	0	0	0	0
HISTPRATPHYDRXNChloroplast	0	0	0	0	0	HISTPRATPHYDRXNChloroplast	0	7.78121e-16	0	2.4348e-06	[0 +]	HISTPRATPHYDRXNChloroplast	0	0	0	0	0	HISTPRATPHYDRXNChloroplast	0	0	0	0	0	HISTPRATPHYDRXNChloroplast	0	0	0	5.43499e-06	[0 +]	HISTPRATPHYDRXNChloroplast	0	0	0	0	0
HOMOCYSMETB12RXN	5.70144e-14	0	0	0	0	HOMOCYSMETB12RXN	2.1308e-16	9.79637e-15	0	2.81924e-06	[0 +]	HOMOCYSMETB12RXN	4.40953e-14	0	0	6.60558e-14	0	HOMOCYSMETB12RXN	0	0	0	0	0	HOMOCYSMETB12RXN	0	0	0	6.63782e-06	[0 +]	HOMOCYSMETB12RXN	0	0	0	2.10537e-13	0
HomocysteineSMethyltransferaseChloroplast	5.752e-14	0	0	-4.02945e-14	0	HomocysteineSMethyltransferaseChloroplast	0	-3.8907e-16	-5.01876e-28	2.81924e-06	[0 +]	HomocysteineSMethyltransferaseChloroplast	4.44505e-14	0	2.98382e-32	-9.43865e-14	0	HomocysteineSMethyltransferaseChloroplast	0	0	9.42259e-41	-1.07867e-13	0	HomocysteineSMethyltransferaseChloroplast	0	0	0	6.63782e-06	[0 +]	HomocysteineSMethyltransferaseChloroplast	0	0	0	-1.73969e-13	0
HomogalacturonanSynthesismod	0	0	0	0	0	HomogalacturonanSynthesismod	0	0	0	0	0	HomogalacturonanSynthesismod	0	0	0	0	0	HomogalacturonanSynthesismod	0	0	0	0	0	HomogalacturonanSynthesismod	0	0	0	0	0	HomogalacturonanSynthesismod	0	0	0	0	0
HomoserDehydrogenaseChloroplast	5.752e-14	0	0	0	0	HomoserDehydrogenaseChloroplast	0	2.33445e-15	0	4.46379e-06	[0 +]	HomoserDehydrogenaseChloroplast	4.44505e-14	0	2.98382e-32	0	0	HomoserDehydrogenaseChloroplast	0	0	0	0	0	HomoserDehydrogenaseChloroplast	0	0	0	1.03822e-05	[0 +]	HomoserDehydrogenaseChloroplast	0	0	0	0	0
HomoserKinaseChloroplast	5.752e-14	0	0	0	0	HomoserKinaseChloroplast	0	2.33445e-15	0	4.46379e-06	[0 +]	HomoserKinaseChloroplast	4.44505e-14	0	2.98382e-32	0	0	HomoserKinaseChloroplast	0	0	0	0	0	HomoserKinaseChloroplast	0	0	0	1.03822e-05	[0 +]	HomoserKinaseChloroplast	0	0	0	0	0
HyC10c0CoAHCD	0	-3.39461e-33	0	1.07192e-13	0	HyC10c0CoAHCD	1.83627e-27	0	0	4.86959e-06	[0 +]	HyC10c0CoAHCD	-1.4885e-27	-4.66628e-31	0	2.0659e-13	0	HyC10c0CoAHCD	-1.28107e-31	0	0	-4.34249e-15	0	HyC10c0CoAHCD	-6.42763e-30	-2.69359e-14	-1.82494e-21	7.56835e-06	[0 +]	HyC10c0CoAHCD	0	0	0	1.96301e-13	0
HyC10c1d4cisCoAHCD	5.41517e-24	0	0	-1.37984e-13	0	HyC10c1d4cisCoAHCD	-1.69148e-29	0	0	3.69417e-06	[0 +]	HyC10c1d4cisCoAHCD	0	0	0	3.64589e-14	0	HyC10c1d4cisCoAHCD	0	-9.24772e-30	5.97567e-27	6.77316e-14	0	HyC10c1d4cisCoAHCD	-3.21382e-30	0	0	6.18178e-06	[0 +]	HyC10c1d4cisCoAHCD	0	0	0	1.00771e-13	0
HyC10c2d4cis7cisCoAHCD	-6.79044e-24	0	-1.01813e-14	7.19721e-14	0	HyC10c2d4cis7cisCoAHCD	-1.6157e-27	0	0	3.45584e-06	[0 +]	HyC10c2d4cis7cisCoAHCD	1.58593e-27	0	1.58593e-27	-1.59753e-13	0	HyC10c2d4cis7cisCoAHCD	0	0	-1.59084e-13	2.15589e-13	0	HyC10c2d4cis7cisCoAHCD	4.22871e-30	0	0	5.95451e-06	[0 +]	HyC10c2d4cis7cisCoAHCD	0	0	0	1.50925e-13	0
HyC12c0CoAHCD	0	-3.39461e-33	0	1.07192e-13	0	HyC12c0CoAHCD	1.83898e-27	0	0	4.86959e-06	[0 +]	HyC12c0CoAHCD	-1.48309e-27	-4.24207e-31	0	2.0659e-13	0	HyC12c0CoAHCD	-1.28107e-31	0	0	-4.34249e-15	0	HyC12c0CoAHCD	-6.51221e-30	-2.69359e-14	-1.82494e-21	7.56835e-06	[0 +]	HyC12c0CoAHCD	0	0	0	1.96301e-13	0
HyC12c1d6cisCoAHCD	5.41517e-24	0	0	-1.37984e-13	0	HyC12c1d6cisCoAHCD	-1.75914e-29	0	0	3.69417e-06	[0 +]	HyC12c1d6cisCoAHCD	0	0	0	3.64589e-14	0	HyC12c1d6cisCoAHCD	0	-9.24772e-30	5.95402e-27	6.77316e-14	0	HyC12c1d6cisCoAHCD	-3.08695e-30	0	0	6.18178e-06	[0 +]	HyC12c1d6cisCoAHCD	0	0	0	1.00771e-13	0
HyC12c2d6cis9cisCoAHCD	-6.79113e-24	0	-1.01813e-14	7.19721e-14	0	HyC12c2d6cis9cisCoAHCD	-1.6157e-27	0	0	3.45584e-06	[0 +]	HyC12c2d6cis9cisCoAHCD	1.58593e-27	0	1.58593e-27	-1.59753e-13	0	HyC12c2d6cis9cisCoAHCD	0	0	-1.59084e-13	2.15589e-13	0	HyC12c2d6cis9cisCoAHCD	4.22871e-30	0	0	5.95451e-06	[0 +]	HyC12c2d6cis9cisCoAHCD	0	0	0	1.50925e-13	0
HyC14c0CoAHCD	0	-3.39461e-33	0	1.07192e-13	0	HyC14c0CoAHCD	1.84033e-27	0	0	4.86959e-06	[0 +]	HyC14c0CoAHCD	-1.4858e-27	-3.81786e-31	0	2.0659e-13	0	HyC14c0CoAHCD	-1.28107e-31	0	0	-4.34249e-15	0	HyC14c0CoAHCD	-5.66647e-30	-2.42423e-13	-1.98995e-21	7.56835e-06	[0 +]	HyC14c0CoAHCD	0	0	0	1.96301e-13	0
HyC14c1d5cisCoAHCD	0	0	0	-8.28044e-14	0	HyC14c1d5cisCoAHCD	0	0	0	3.96782e-06	[0 +]	HyC14c1d5cisCoAHCD	0	0	0	2.02426e-13	0	HyC14c1d5cisCoAHCD	0	0	0	2.75018e-13	0	HyC14c1d5cisCoAHCD	-8.45741e-31	2.15487e-13	1.70147e-22	6.42709e-06	[0 +]	HyC14c1d5cisCoAHCD	0	0	0	5.61836e-14	0
HyC14c2d5cis8cisCoAHCD	5.41517e-24	0	0	-1.37984e-13	0	HyC14c2d5cis8cisCoAHCD	-1.69148e-29	0	0	3.69417e-06	[0 +]	HyC14c2d5cis8cisCoAHCD	0	0	0	3.64589e-14	0	HyC14c2d5cis8cisCoAHCD	0	-9.26893e-30	5.97567e-27	6.77316e-14	0	HyC14c2d5cis8cisCoAHCD	-3.21382e-30	0	0	6.18178e-06	[0 +]	HyC14c2d5cis8cisCoAHCD	0	0	0	1.00771e-13	0
HyC14c3d5cis8cis11cisCoAHCD	-6.79113e-24	0	-1.01813e-14	7.19721e-14	0	HyC14c3d5cis8cis11cisCoAHCD	-1.6157e-27	0	0	3.45584e-06	[0 +]	HyC14c3d5cis8cis11cisCoAHCD	1.58323e-27	0	1.58323e-27	-1.59753e-13	0	HyC14c3d5cis8cis11cisCoAHCD	0	0	-1.59084e-13	2.15589e-13	0	HyC14c3d5cis8cis11cisCoAHCD	4.22871e-30	0	0	5.95451e-06	[0 +]	HyC14c3d5cis8cis11cisCoAHCD	0	0	0	1.50925e-13	0
HyC16c0CoAHCD	0	-3.39461e-33	0	1.07192e-13	0	HyC16c0CoAHCD	1.84169e-27	0	0	4.86959e-06	[0 +]	HyC16c0CoAHCD	-1.48309e-27	-4.66628e-31	0	2.0659e-13	0	HyC16c0CoAHCD	-1.28107e-31	0	0	-4.34249e-15	0	HyC16c0CoAHCD	-5.66647e-30	-2.42423e-13	-1.98995e-21	7.56835e-06	[0 +]	HyC16c0CoAHCD	0	0	0	1.96301e-13	0
HyC16c1d7cisCoAHCD	0	0	0	-8.28044e-14	0	HyC16c1d7cisCoAHCD	0	0	0	3.96782e-06	[0 +]	HyC16c1d7cisCoAHCD	0	0	0	2.02426e-13	0	HyC16c1d7cisCoAHCD	0	0	0	2.75018e-13	0	HyC16c1d7cisCoAHCD	-8.66885e-31	2.15487e-13	1.70148e-22	6.42709e-06	[0 +]	HyC16c1d7cisCoAHCD	0	0	0	5.61836e-14	0
HyC16c2d7cis10cisCoAHCD	5.41794e-24	0	0	-1.37984e-13	0	HyC16c2d7cis10cisCoAHCD	-1.75914e-29	0	0	3.69417e-06	[0 +]	HyC16c2d7cis10cisCoAHCD	0	0	0	3.64589e-14	0	HyC16c2d7cis10cisCoAHCD	0	-9.29014e-30	5.96484e-27	6.77316e-14	0	HyC16c2d7cis10cisCoAHCD	-2.15664e-30	0	0	6.18178e-06	[0 +]	HyC16c2d7cis10cisCoAHCD	0	0	0	1.00771e-13	0
HyC16c3d7cis10cis13cisCoAHCD	-6.79182e-24	0	-1.01813e-14	7.19721e-14	0	HyC16c3d7cis10cis13cisCoAHCD	-1.6157e-27	0	0	3.45584e-06	[0 +]	HyC16c3d7cis10cis13cisCoAHCD	1.58052e-27	0	1.58052e-27	-1.59753e-13	0	HyC16c3d7cis10cis13cisCoAHCD	0	0	-1.59084e-13	2.15589e-13	0	HyC16c3d7cis10cis13cisCoAHCD	4.22871e-30	0	0	5.95451e-06	[0 +]	HyC16c3d7cis10cis13cisCoAHCD	0	0	0	1.50925e-13	0
HyC18c0CoAHCD	0	-3.39461e-33	0	1.51639e-13	0	HyC18c0CoAHCD	0	0	0	4.28524e-06	[0 +]	HyC18c0CoAHCD	0	-5.9389e-31	0	4.83956e-14	0	HyC18c0CoAHCD	-1.28107e-31	0	0	5.9654e-14	0	HyC18c0CoAHCD	0	0	-1.98747e-21	6.69268e-06	[0 +]	HyC18c0CoAHCD	0	0	0	1.89309e-13	0
HyC18c1d9cisCoAHCD	0	0	0	-8.28044e-14	0	HyC18c1d9cisCoAHCD	0	0	0	3.96782e-06	[0 +]	HyC18c1d9cisCoAHCD	0	0	0	2.02426e-13	0	HyC18c1d9cisCoAHCD	0	0	0	2.75018e-13	0	HyC18c1d9cisCoAHCD	-8.88028e-31	2.15487e-13	1.70148e-22	6.42709e-06	[0 +]	HyC18c1d9cisCoAHCD	0	0	0	5.61836e-14	0
HyC18c2d9cis12cisCoAHCD	5.41932e-24	0	0	-1.37984e-13	0	HyC18c2d9cis12cisCoAHCD	-1.89446e-29	0	0	3.69417e-06	[0 +]	HyC18c2d9cis12cisCoAHCD	0	0	0	3.64589e-14	0	HyC18c2d9cis12cisCoAHCD	0	-9.26893e-30	5.95402e-27	6.77316e-14	0	HyC18c2d9cis12cisCoAHCD	-1.08514e-30	0	0	6.18178e-06	[0 +]	HyC18c2d9cis12cisCoAHCD	0	0	0	1.00771e-13	0
HyC18c3d9cis12cis15cisCoAHCD	-6.79321e-24	0	-1.01813e-14	7.19721e-14	0	HyC18c3d9cis12cis15cisCoAHCD	-1.61638e-27	0	0	3.45584e-06	[0 +]	HyC18c3d9cis12cis15cisCoAHCD	1.58052e-27	0	1.58052e-27	-1.59753e-13	0	HyC18c3d9cis12cis15cisCoAHCD	0	0	-1.59084e-13	2.15589e-13	0	HyC18c3d9cis12cis15cisCoAHCD	4.22871e-30	0	0	5.95451e-06	[0 +]	HyC18c3d9cis12cis15cisCoAHCD	0	0	0	1.50925e-13	0
HyC18c4d6cis9cis12cis15cisCoAHCD	0	0	0	0	0	HyC18c4d6cis9cis12cis15cisCoAHCD	0	0	0	0	0	HyC18c4d6cis9cis12cis15cisCoAHCD	0	0	0	0	0	HyC18c4d6cis9cis12cis15cisCoAHCD	0	0	0	0	0	HyC18c4d6cis9cis12cis15cisCoAHCD	0	0	0	0	0	HyC18c4d6cis9cis12cis15cisCoAHCD	0	0	0	0	0
HyC20c0CoAHCD	0	0	0	0	0	HyC20c0CoAHCD	0	0	0	0	0	HyC20c0CoAHCD	0	0	0	0	0	HyC20c0CoAHCD	0	0	0	0	0	HyC20c0CoAHCD	0	0	0	0	0	HyC20c0CoAHCD	0	0	0	0	0
HyC20c1d11cisCoAHCD	0	0	0	0	0	HyC20c1d11cisCoAHCD	0	0	0	0	0	HyC20c1d11cisCoAHCD	0	0	0	0	0	HyC20c1d11cisCoAHCD	0	0	0	0	0	HyC20c1d11cisCoAHCD	0	0	0	0	0	HyC20c1d11cisCoAHCD	0	0	0	0	0
HyC20c3d11cis14cis17cisCoAHCD	0	0	0	0	0	HyC20c3d11cis14cis17cisCoAHCD	0	0	0	0	0	HyC20c3d11cis14cis17cisCoAHCD	0	0	0	0	0	HyC20c3d11cis14cis17cisCoAHCD	0	0	0	0	0	HyC20c3d11cis14cis17cisCoAHCD	0	0	0	0	0	HyC20c3d11cis14cis17cisCoAHCD	0	0	0	0	0
HyC22c0CoAHCD	0	0	0	0	0	HyC22c0CoAHCD	0	0	0	0	0	HyC22c0CoAHCD	0	0	0	0	0	HyC22c0CoAHCD	0	0	0	0	0	HyC22c0CoAHCD	0	0	0	0	0	HyC22c0CoAHCD	0	0	0	0	0
HyC22c1d13cisCoAHCD	0	0	0	0	0	HyC22c1d13cisCoAHCD	0	0	0	0	0	HyC22c1d13cisCoAHCD	0	0	0	0	0	HyC22c1d13cisCoAHCD	0	0	0	0	0	HyC22c1d13cisCoAHCD	0	0	0	0	0	HyC22c1d13cisCoAHCD	0	0	0	0	0
HyC4c0CoAHCD	-1.37358e-24	-3.39461e-33	-6.96544e-14	-7.00943e-14	0	HyC4c0CoAHCD	2.02745e-28	0	0	4.86959e-06	[0 +]	HyC4c0CoAHCD	9.43582e-29	-3.91921e-31	2.60529e-28	2.0659e-13	0	HyC4c0CoAHCD	-1.28107e-31	-9.19489e-30	-1.41086e-13	-3.71626e-14	0	HyC4c0CoAHCD	-3.45354e-30	-2.69359e-14	6.97873e-23	7.56835e-06	[0 +]	HyC4c0CoAHCD	0	0	0	1.96301e-13	0
HyC6c0CoAHCD	-1.37371e-24	-3.39461e-33	-6.96544e-14	-7.00943e-14	0	HyC6c0CoAHCD	2.03147e-28	0	0	4.86959e-06	[0 +]	HyC6c0CoAHCD	1.01151e-28	-4.27329e-31	2.65224e-28	2.0659e-13	0	HyC6c0CoAHCD	-1.28107e-31	-9.20529e-30	-1.41086e-13	-3.71626e-14	0	HyC6c0CoAHCD	-3.42525e-30	-2.69359e-14	6.97873e-23	7.56835e-06	[0 +]	HyC6c0CoAHCD	0	0	0	1.96301e-13	0
HyC8c0CoAHCD	5.41517e-24	-3.39461e-33	0	-4.54333e-14	0	HyC8c0CoAHCD	1.81936e-27	0	0	4.86959e-06	[0 +]	HyC8c0CoAHCD	-1.4885e-27	-3.92524e-31	-2.81768e-14	2.0659e-13	0	HyC8c0CoAHCD	-1.28107e-31	-9.22651e-30	-1.21917e-25	1.4828e-13	0	HyC8c0CoAHCD	-8.37284e-30	-2.69359e-14	-1.82494e-21	7.56835e-06	[0 +]	HyC8c0CoAHCD	0	0	0	1.96301e-13	0
HyC8c1d5cisCoAHCD	-6.79044e-24	0	-1.01813e-14	7.19721e-14	0	HyC8c1d5cisCoAHCD	-1.61503e-27	0	0	3.45584e-06	[0 +]	HyC8c1d5cisCoAHCD	1.59135e-27	0	1.59135e-27	-1.59753e-13	0	HyC8c1d5cisCoAHCD	0	0	-1.59084e-13	2.15589e-13	0	HyC8c1d5cisCoAHCD	4.14413e-30	0	0	5.95451e-06	[0 +]	HyC8c1d5cisCoAHCD	0	0	0	1.50925e-13	0
HYDROXYMETHYLGLUTARYLCOASYNTHASERXN	-1.7428e-24	0	0	0	0	HYDROXYMETHYLGLUTARYLCOASYNTHASERXN	0	0	0	0	0	HYDROXYMETHYLGLUTARYLCOASYNTHASERXN	0	0	0	0	0	HYDROXYMETHYLGLUTARYLCOASYNTHASERXN	0	0	0	0	0	HYDROXYMETHYLGLUTARYLCOASYNTHASERXN	0	0	0	0	0	HYDROXYMETHYLGLUTARYLCOASYNTHASERXN	0	0	0	0	0
IGPSynRxnChloroplast	0	0	0	0	0	IGPSynRxnChloroplast	0	0	0	0	0	IGPSynRxnChloroplast	0	0	0	0	0	IGPSynRxnChloroplast	0	0	0	0	0	IGPSynRxnChloroplast	0	0	0	0	0	IGPSynRxnChloroplast	0	0	0	0	0
IMIDPHOSDEHYDRXNChloroplast	0	0	0	0	0	IMIDPHOSDEHYDRXNChloroplast	0	7.78121e-16	0	2.4348e-06	[0 +]	IMIDPHOSDEHYDRXNChloroplast	0	0	0	0	0	IMIDPHOSDEHYDRXNChloroplast	0	0	0	0	0	IMIDPHOSDEHYDRXNChloroplast	0	0	0	5.43499e-06	[0 +]	IMIDPHOSDEHYDRXNChloroplast	0	0	0	0	0
IMPCYCLOHYDROLASERXNChloroplast	0	0	0	0	0	IMPCYCLOHYDROLASERXNChloroplast	0	7.78121e-16	0	2.4348e-06	[0 +]	IMPCYCLOHYDROLASERXNChloroplast	0	0	0	0	0	IMPCYCLOHYDROLASERXNChloroplast	0	0	0	0	0	IMPCYCLOHYDROLASERXNChloroplast	0	0	0	5.43499e-06	[0 +]	IMPCYCLOHYDROLASERXNChloroplast	0	0	0	0	0
IMPDEHYDROGRXN	0	1.1078e-30	0	0	0	IMPDEHYDROGRXN	0	-2.40962e-31	0	0	0	IMPDEHYDROGRXN	0	0	0	0	0	IMPDEHYDROGRXN	0	1.52879e-30	0	0	0	IMPDEHYDROGRXN	0	0	0	0	0	IMPDEHYDROGRXN	0	0	0	0	0
INORGPYROPHOSPHATRXNchloroplast	-8.70461e-14	1.00415e-11	0	0	0	INORGPYROPHOSPHATRXNchloroplast	0	-2.94583e-16	0	15.8466	[0 +]	INORGPYROPHOSPHATRXNchloroplast	0	1.09382e-11	0	2.8029e-12	0	INORGPYROPHOSPHATRXNchloroplast	-8.04018e-13	1.28126e-15	0	1.96634e-11	0	INORGPYROPHOSPHATRXNchloroplast	0	0	0	5.94975	[0 +]	INORGPYROPHOSPHATRXNchloroplast	0	0	0	8.37894e-12	0
IPPISOMRXN	-5.54224e-24	0	-1.26383e-26	1.62599e-15	0	IPPISOMRXN	0	0	1.42551e-27	1.14041e-27	0	IPPISOMRXN	0	0	3.13053e-14	2.07063e-14	0	IPPISOMRXN	0	0	2.64407e-26	-1.01338e-14	0	IPPISOMRXN	0	0	0	6.89166e-21	0	IPPISOMRXN	0	0	-2.26297e-14	3.91511e-14	0
IPPISOMRXNChloroplast	0	0	0	0	0	IPPISOMRXNChloroplast	0	0	0	0	0	IPPISOMRXNChloroplast	0	0	0	0	0	IPPISOMRXNChloroplast	0	0	0	0	0	IPPISOMRXNChloroplast	0	0	0	0	0	IPPISOMRXNChloroplast	0	0	0	0	0
ISOCITCLEAVRXN	0	-2.60499e-16	0	0	0	ISOCITCLEAVRXN	1.10141e-13	0	2.76362e-25	5.35655e-05	[0 +]	ISOCITCLEAVRXN	-5.05809e-25	0	0	6.43471e-13	0	ISOCITCLEAVRXN	0	0	0	1.98912e-12	0	ISOCITCLEAVRXN	1.09521e-13	0	0	5.78438e-05	[0 +]	ISOCITCLEAVRXN	1.07133e-13	4.75876e-15	0	1.65465e-12	0
ISOCITDEHRXN	1.44819e-13	2.60499e-16	0	0	0	ISOCITDEHRXN	0	0	0	5.35655e-05	[0 +]	ISOCITDEHRXN	0	0	0	0	0	ISOCITDEHRXN	4.74711e-13	0	0	4.93564e-13	0	ISOCITDEHRXN	0	4.3732e-15	0	3.52093e-05	[0 +]	ISOCITDEHRXN	0	0	0	7.37857e-13	0
ISOCITRATEDEHYDROGENASENADRXNmitochondrion	0	0	0	0	0	ISOCITRATEDEHYDROGENASENADRXNmitochondrion	0	0	0	5.35655e-05	[0 +]	ISOCITRATEDEHYDROGENASENADRXNmitochondrion	0	0	0	4.50768e-13	0	ISOCITRATEDEHYDROGENASENADRXNmitochondrion	0	0	0	6.14324e-13	0	ISOCITRATEDEHYDROGENASENADRXNmitochondrion	0	0	0	3.52093e-05	[0 +]	ISOCITRATEDEHYDROGENASENADRXNmitochondrion	0	0	0	8.90108e-13	0
IsocitrateLyasePeroxisome	-6.18894e-24	1.03561e-32	-6.95095e-14	2.02752e-13	0	IsocitrateLyasePeroxisome	0	0	0	2.85683e-05	[0 +]	IsocitrateLyasePeroxisome	1.18267e-27	0	1.18267e-27	6.82239e-13	0	IsocitrateLyasePeroxisome	0	3.92969e-15	-3.60022e-26	-5.91947e-14	0	IsocitrateLyasePeroxisome	0	0	0	4.40715e-05	[0 +]	IsocitrateLyasePeroxisome	0	0	0	2.42575e-13	0
ISPH2RXNDELTA3ISOPENTENYLPPNADPWATERHYDROXYMETHYLBUTENYLDIPNADPHPROTON74Chloroplast	0	0	0	0	0	ISPH2RXNDELTA3ISOPENTENYLPPNADPWATERHYDROXYMETHYLBUTENYLDIPNADPHPROTON74Chloroplast	0	0	0	0	0	ISPH2RXNDELTA3ISOPENTENYLPPNADPWATERHYDROXYMETHYLBUTENYLDIPNADPHPROTON74Chloroplast	0	0	0	0	0	ISPH2RXNDELTA3ISOPENTENYLPPNADPWATERHYDROXYMETHYLBUTENYLDIPNADPHPROTON74Chloroplast	0	0	0	0	0	ISPH2RXNDELTA3ISOPENTENYLPPNADPWATERHYDROXYMETHYLBUTENYLDIPNADPHPROTON74Chloroplast	0	0	0	0	0	ISPH2RXNDELTA3ISOPENTENYLPPNADPWATERHYDROXYMETHYLBUTENYLDIPNADPHPROTON74Chloroplast	0	0	0	0	0
ISPH2RXNDELTA3ISOPENTENYLPPNADWATERHYDROXYMETHYLBUTENYLDIPNADHPROTON72Chloroplast	0	0	0	0	0	ISPH2RXNDELTA3ISOPENTENYLPPNADWATERHYDROXYMETHYLBUTENYLDIPNADHPROTON72Chloroplast	0	0	0	0	0	ISPH2RXNDELTA3ISOPENTENYLPPNADWATERHYDROXYMETHYLBUTENYLDIPNADHPROTON72Chloroplast	0	0	0	0	0	ISPH2RXNDELTA3ISOPENTENYLPPNADWATERHYDROXYMETHYLBUTENYLDIPNADHPROTON72Chloroplast	0	0	0	0	0	ISPH2RXNDELTA3ISOPENTENYLPPNADWATERHYDROXYMETHYLBUTENYLDIPNADHPROTON72Chloroplast	0	0	0	0	0	ISPH2RXNDELTA3ISOPENTENYLPPNADWATERHYDROXYMETHYLBUTENYLDIPNADHPROTON72Chloroplast	0	0	0	0	0
LigninSink	0	0	0	0	0	LigninSink	0	8.5451e-13	0	2.59335e-05	[0 +]	LigninSink	0	0	0	0	0	LigninSink	0	0	0	0	0	LigninSink	0	0	0	4.7343e-05	[0 +]	LigninSink	0	0	0	6.65115e-15	0
LinoleicAcidKETOACYLCOATHIOLRXN	5.41852e-24	0	0	0	0	LinoleicAcidKETOACYLCOATHIOLRXN	-1.88706e-29	0	0	3.69417e-06	[0 +]	LinoleicAcidKETOACYLCOATHIOLRXN	0	0	0	3.64589e-14	0	LinoleicAcidKETOACYLCOATHIOLRXN	0	-9.26943e-30	0	6.77316e-14	0	LinoleicAcidKETOACYLCOATHIOLRXN	-2.22007e-30	0	0	6.18178e-06	[0 +]	LinoleicAcidKETOACYLCOATHIOLRXN	0	0	0	1.00771e-13	0
LinolenicAcidKETOACYLCOATHIOLRXN	-6.79276e-24	0	0	0	0	LinolenicAcidKETOACYLCOATHIOLRXN	-1.61621e-27	0	0	3.45584e-06	[0 +]	LinolenicAcidKETOACYLCOATHIOLRXN	1.58291e-27	0	0	0	0	LinolenicAcidKETOACYLCOATHIOLRXN	0	0	0	2.15589e-13	0	LinolenicAcidKETOACYLCOATHIOLRXN	4.30138e-30	0	0	5.95451e-06	[0 +]	LinolenicAcidKETOACYLCOATHIOLRXN	0	0	0	1.50925e-13	0
LinolenoylCoASynthesis	0	0	0	0	0	LinolenoylCoASynthesis	-3.23242e-29	0	0	7.92328	[0 +]	LinolenoylCoASynthesis	0	0	0	0	0	LinolenoylCoASynthesis	0	0	0	9.0733e-12	0	LinolenoylCoASynthesis	0	0	0	2.97488	[0 +]	LinolenoylCoASynthesis	0	1.25559e-32	0	2.18436e-12	0
LinolenoylLinolenoylDiacylglycerolSink	0	0	0	0	0	LinolenoylLinolenoylDiacylglycerolSink	0	6.00873e-16	2.24904e-23	4.57825e-07	0	LinolenoylLinolenoylDiacylglycerolSink	2.14741e-25	0	0	8.75209e-15	0	LinolenoylLinolenoylDiacylglycerolSink	0	0	0	0	0	LinolenoylLinolenoylDiacylglycerolSink	0	0	0	8.73586e-07	0	LinolenoylLinolenoylDiacylglycerolSink	0	0	0	5.47058e-16	0
LinolenoylLinolenoylPhosphatidylCholineSink	0	0	0	0	0	LinolenoylLinolenoylPhosphatidylCholineSink	0	0	0	3.96782e-07	0	LinolenoylLinolenoylPhosphatidylCholineSink	0	0	0	5.25051e-15	0	LinolenoylLinolenoylPhosphatidylCholineSink	0	0	0	3.88512e-14	0	LinolenoylLinolenoylPhosphatidylCholineSink	0	0	0	7.62537e-07	0	LinolenoylLinolenoylPhosphatidylCholineSink	0	0	0	0	0
LinoleoylCoASynthesis	0	0	0	0	0	LinoleoylCoASynthesis	0	0	0	7.92328	[0 +]	LinoleoylCoASynthesis	0	0	0	0	0	LinoleoylCoASynthesis	0	0	0	6.93853e-12	0	LinoleoylCoASynthesis	0	0	0	2.97488	[0 +]	LinoleoylCoASynthesis	0	-5.99967e-30	0	2.16964e-12	0
LinoleoylLinolenoylDiacylglycerolSink	0	0	0	0	0	LinoleoylLinolenoylDiacylglycerolSink	0	4.89098e-17	0	4.61772e-07	0	LinoleoylLinolenoylDiacylglycerolSink	0	0	0	8.16906e-15	0	LinoleoylLinolenoylDiacylglycerolSink	0	0	0	1.89355e-14	0	LinoleoylLinolenoylDiacylglycerolSink	0	0	0	8.78323e-07	0	LinoleoylLinolenoylDiacylglycerolSink	0	0	0	2.71592e-14	0
LinoleoylLinolenoylPhosphatidylCholineSink	0	0	0	0	0	LinoleoylLinolenoylPhosphatidylCholineSink	0	4.0142e-16	0	3.99743e-07	0	LinoleoylLinolenoylPhosphatidylCholineSink	0	0	0	5.39805e-15	0	LinoleoylLinolenoylPhosphatidylCholineSink	0	0	0	2.94031e-14	0	LinoleoylLinolenoylPhosphatidylCholineSink	0	0	0	7.66144e-07	0	LinoleoylLinolenoylPhosphatidylCholineSink	0	0	0	1.59657e-14	0
LinoleoylLinoleoylDiacylglycerolSink	0	0	0	0	0	LinoleoylLinoleoylDiacylglycerolSink	0	0	0	0	0	LinoleoylLinoleoylDiacylglycerolSink	0	0	0	0	0	LinoleoylLinoleoylDiacylglycerolSink	0	0	0	0	0	LinoleoylLinoleoylDiacylglycerolSink	0	0	0	0	0	LinoleoylLinoleoylDiacylglycerolSink	0	0	0	0	0
LinoleoylLinoleoylPhosphatidylCholineSink	0	0	0	0	0	LinoleoylLinoleoylPhosphatidylCholineSink	0	0	0	4.02748e-07	0	LinoleoylLinoleoylPhosphatidylCholineSink	0	0	0	6.11019e-15	0	LinoleoylLinoleoylPhosphatidylCholineSink	0	0	0	3.55156e-14	0	LinoleoylLinoleoylPhosphatidylCholineSink	0	0	0	7.69785e-07	0	LinoleoylLinoleoylPhosphatidylCholineSink	0	0	0	5.23857e-15	0
Lipase16c0c16c0c16c0	0	0	0	0	0	Lipase16c0c16c0c16c0	0	0	0	2.26379	[0 +]	Lipase16c0c16c0c16c0	0	0	0	0	0	Lipase16c0c16c0c16c0	0	0	0	2.19989e-12	0	Lipase16c0c16c0c16c0	0	0	0	0.849964	[0 +]	Lipase16c0c16c0c16c0	0	0	0	1.19987e-12	0
Lipase16c0c16c0c18c1	0	0	0	0	0	Lipase16c0c16c0c18c1	0	0	0	2.26379	[0 +]	Lipase16c0c16c0c18c1	0	0	0	5.00845e-13	0	Lipase16c0c16c0c18c1	0	0	0	2.90079e-12	0	Lipase16c0c16c0c18c1	0	0	0	0.849964	[0 +]	Lipase16c0c16c0c18c1	0	0	0	7.60294e-13	0
Lipase16c0c16c0c18c2	0	0	0	0	0	Lipase16c0c16c0c18c2	0	0	0	2.26379	[0 +]	Lipase16c0c16c0c18c2	0	0	0	0	0	Lipase16c0c16c0c18c2	0	0	0	2.36859e-12	0	Lipase16c0c16c0c18c2	-3.50486e-30	0	0	0.849964	[0 +]	Lipase16c0c16c0c18c2	0	0	0	6.14106e-13	0
Lipase16c0c16c0c18c3	0	0	0	0	0	Lipase16c0c16c0c18c3	0	0	0	2.26379	[0 +]	Lipase16c0c16c0c18c3	0	0	0	0	0	Lipase16c0c16c0c18c3	0	0	0	1.60784e-12	0	Lipase16c0c16c0c18c3	0	0	0	0.849964	[0 +]	Lipase16c0c16c0c18c3	0	0	0	0	0
Lipase16c0c18c1c18c1	0	0	0	0	0	Lipase16c0c18c1c18c1	0	0	0	2.26379	[0 +]	Lipase16c0c18c1c18c1	0	0	0	0	0	Lipase16c0c18c1c18c1	0	0	0	3.64778e-12	0	Lipase16c0c18c1c18c1	0	0	0	0.849964	[0 +]	Lipase16c0c18c1c18c1	0	0	0	0	0
Lipase16c0c18c1c18c2	0	0	0	0	0	Lipase16c0c18c1c18c2	0	0	0	2.26379	[0 +]	Lipase16c0c18c1c18c2	0	0	0	6.30783e-13	0	Lipase16c0c18c1c18c2	0	0	0	0	0	Lipase16c0c18c1c18c2	0	0	0	0.849964	[0 +]	Lipase16c0c18c1c18c2	0	0	0	0	0
Lipase16c0c18c1c18c3	0	0	0	0	0	Lipase16c0c18c1c18c3	0	0	0	2.26379	[0 +]	Lipase16c0c18c1c18c3	0	0	0	0	0	Lipase16c0c18c1c18c3	0	0	0	1.08795e-12	0	Lipase16c0c18c1c18c3	0	0	0	0.849964	[0 +]	Lipase16c0c18c1c18c3	0	0	0	0	0
Lipase16c0c18c2c18c2	0	0	0	0	0	Lipase16c0c18c2c18c2	0	0	0	2.26379	[0 +]	Lipase16c0c18c2c18c2	0	0	0	1.53604e-12	0	Lipase16c0c18c2c18c2	0	0	0	1.88968e-12	0	Lipase16c0c18c2c18c2	0	0	0	0.849964	[0 +]	Lipase16c0c18c2c18c2	0	0	0	6.2249e-13	0
Lipase16c0c18c2c18c3	0	0	0	0	0	Lipase16c0c18c2c18c3	0	0	0	2.26379	[0 +]	Lipase16c0c18c2c18c3	0	0	0	3.03174e-12	0	Lipase16c0c18c2c18c3	0	0	0	9.53894e-13	0	Lipase16c0c18c2c18c3	0	0	0	0.849964	[0 +]	Lipase16c0c18c2c18c3	0	0	0	6.33393e-13	0
Lipase16c0c18c3c18c3	4.1338e-26	0	0	0	0	Lipase16c0c18c3c18c3	0	0	0	2.26379	[0 +]	Lipase16c0c18c3c18c3	0	0	0	6.54257e-13	0	Lipase16c0c18c3c18c3	0	0	0	3.62179e-12	0	Lipase16c0c18c3c18c3	0	0	0	0.849964	[0 +]	Lipase16c0c18c3c18c3	0	0	0	0	0
Lipase18c1c18c1c18c1	0	0	0	0	0	Lipase18c1c18c1c18c1	0	0	0	2.26379	[0 +]	Lipase18c1c18c1c18c1	0	0	0	0	0	Lipase18c1c18c1c18c1	0	0	0	6.76162e-13	0	Lipase18c1c18c1c18c1	0	0	0	0.849964	[0 +]	Lipase18c1c18c1c18c1	0	0	0	1.17777e-12	0
Lipase18c1c18c1c18c2	0	0	0	0	0	Lipase18c1c18c1c18c2	0	0	0	2.26379	[0 +]	Lipase18c1c18c1c18c2	0	0	0	1.8084e-12	0	Lipase18c1c18c1c18c2	0	0	0	3.89432e-12	0	Lipase18c1c18c1c18c2	0	0	0	0.849964	[0 +]	Lipase18c1c18c1c18c2	0	0	0	6.38048e-13	0
Lipase18c1c18c1c18c3	0	0	0	0	0	Lipase18c1c18c1c18c3	0	0	0	2.26379	[0 +]	Lipase18c1c18c1c18c3	0	0	0	0	0	Lipase18c1c18c1c18c3	0	0	0	2.75744e-13	0	Lipase18c1c18c1c18c3	0	0	0	0.849964	[0 +]	Lipase18c1c18c1c18c3	0	0	0	0	0
Lipase18c1c18c2c18c2	3.69955e-25	0	0	0	0	Lipase18c1c18c2c18c2	0	0	0	2.26379	[0 +]	Lipase18c1c18c2c18c2	0	0	0	4.24375e-13	0	Lipase18c1c18c2c18c2	0	0	0	4.64481e-12	0	Lipase18c1c18c2c18c2	0	0	0	0.849964	[0 +]	Lipase18c1c18c2c18c2	0	0	0	7.71985e-13	0
Lipase18c1c18c2c18c3	0	0	0	0	0	Lipase18c1c18c2c18c3	0	0	0	2.26379	[0 +]	Lipase18c1c18c2c18c3	0	0	0	0	0	Lipase18c1c18c2c18c3	0	0	0	2.08903e-12	0	Lipase18c1c18c2c18c3	0	0	0	0.849964	[0 +]	Lipase18c1c18c2c18c3	0	0	0	0	0
Lipase18c1c18c3c18c3	0	0	0	0	0	Lipase18c1c18c3c18c3	0	0	0	2.26379	[0 +]	Lipase18c1c18c3c18c3	0	0	0	0	0	Lipase18c1c18c3c18c3	0	0	0	1.25259e-12	0	Lipase18c1c18c3c18c3	0	0	0	0.849964	[0 +]	Lipase18c1c18c3c18c3	0	0	0	0	0
Lipase18c2c18c2c18c2	0	0	0	0	0	Lipase18c2c18c2c18c2	-1.19453e-30	0	0	2.02852	[0 +]	Lipase18c2c18c2c18c2	0	0	0	4.51017e-13	0	Lipase18c2c18c2c18c2	0	0	0	1.85061e-12	0	Lipase18c2c18c2c18c2	3.46506e-31	0	0	0.849964	[0 +]	Lipase18c2c18c2c18c2	0	0	0	1.53665e-12	0
Lipase18c2c18c2c18c3	-6.86351e-24	0	0	0	0	Lipase18c2c18c2c18c3	0	0	0	2.02852	[0 +]	Lipase18c2c18c2c18c3	0	0	0	0	0	Lipase18c2c18c2c18c3	0	0	0	9.30477e-13	0	Lipase18c2c18c2c18c3	0	0	0	0.849964	[0 +]	Lipase18c2c18c2c18c3	0	0	0	6.30593e-13	0
Lipase18c2c18c3c18c3	0	0	0	0	0	Lipase18c2c18c3c18c3	0	0	0	2.02852	[0 +]	Lipase18c2c18c3c18c3	0	0	0	3.05458e-12	0	Lipase18c2c18c3c18c3	0	0	0	3.40959e-12	0	Lipase18c2c18c3c18c3	1.65176e-30	0	0	0.849964	[0 +]	Lipase18c2c18c3c18c3	0	1.3731e-32	0	1.21748e-12	0
Lipase18c3c18c3c18c3	1.13598e-43	0	0	0	0	Lipase18c3c18c3c18c3	2.89976e-30	0	0	2.00174	[0 +]	Lipase18c3c18c3c18c3	0	0	0	1.17922e-13	0	Lipase18c3c18c3c18c3	0	0	0	2.35878e-12	0	Lipase18c3c18c3c18c3	0	0	0	0.849964	[0 +]	Lipase18c3c18c3c18c3	0	0	0	0	0
LipidSink	0	0	0	0	0	LipidSink	0	1.92274e-12	0	5.83533e-05	[0 +]	LipidSink	0	0	0	0	0	LipidSink	0	0	0	0	0	LipidSink	0	0	0	0.000106527	[0 +]	LipidSink	0	0	0	1.49658e-14	0
LPAAT1	-5.37982e-24	0	0	0	0	LPAAT1	0.180756	-1.18866e-32	4.03861e-16	2.76303	[0 +]	LPAAT1	0.241009	2.23438e-17	0	0.241009	[0 +]	LPAAT1	0	0	0	0	0	LPAAT1	0.122156	-8.42784e-17	0	1.35604	[0 +]	LPAAT1	0.213772	8.33493e-17	1.05882e-16	0.244311	[0 +]
LPAAT2	1.23439e-23	0	0	0	0	LPAAT2	0.421765	0.602521	0	2.86632	[0 +]	LPAAT2	0.361513	0.602521	0.361513	0.602521	[+ +]	LPAAT2	0	0	0	2.62725e-12	0	LPAAT2	0.488622	0.610778	0	1.46074	[0 +]	LPAAT2	0.397005	0.610778	0.366467	0.610778	[+ +]
LPCAT16c0c16c0	4.25491e-26	0	7.7362e-27	-2.09784e-12	0	LPCAT16c0c16c0	0.0602521	0	-5.63776e-23	8.16429	[0 +]	LPCAT16c0c16c0	0	0	0	0.241009	[0 +]	LPCAT16c0c16c0	0	0	0	1.15007e-11	0	LPCAT16c0c16c0	1.13817e-30	0	-8.28792e-27	3.21919	[0 +]	LPCAT16c0c16c0	0.0305389	-1.37376e-33	-9.87997e-34	0.244311	[0 +]
LPCAT16c0c18c1	5.38131e-24	0	1.32923e-14	2.87562e-12	0	LPCAT16c0c18c1	0.84353	0.241009	-2.76303	8.88731	[- +]	LPCAT16c0c18c1	-0.241009	5.1261e-32	-0.241009	0.964034	[- +]	LPCAT16c0c18c1	0	0	-1.38374e-12	3.29987e-12	0	LPCAT16c0c18c1	0.855089	0.244311	-1.35604	3.95212	[- +]	LPCAT16c0c18c1	-0.213772	1.31814e-31	-0.244311	0.977244	[- +]
LPCAT16c0c18c2	1.26374e-23	0	1.98026e-13	2.86577e-12	0	LPCAT16c0c18c2	-0.180756	-0.241009	-1.44605	9.12832	[- +]	LPCAT16c0c18c2	0.964034	-3.21657e-32	-1.20504	1.20504	[- +]	LPCAT16c0c18c2	0	0	-7.09639e-14	6.93853e-12	0	LPCAT16c0c18c2	-0.244311	0	-1.46587	4.19643	[- +]	LPCAT16c0c18c2	1.00778	-4.28876e-32	-1.22156	1.22156	[- +]
LPCAT16c0c18c3	-1.14341e-23	0	-3.70555e-14	-1.13217e-13	0	LPCAT16c0c18c3	-0.662773	0	-1.08454	8.16429	[- +]	LPCAT16c0c18c3	-0.723026	0	-1.08454	0.241009	[- +]	LPCAT16c0c18c3	0	0	-1.78708e-14	1.23794e-11	0	LPCAT16c0c18c3	-0.610778	-0.244311	-1.0994	3.21919	[- +]	LPCAT16c0c18c3	-0.82455	0	-1.0994	0.244311	[- +]
LPCAT18c1c18c1	-2.02715e-23	0	-1.48823e-13	7.70156e-12	0	LPCAT18c1c18c1	-0.301261	0	-2.86632	9.12832	[- +]	LPCAT18c1c18c1	0.84353	0.241009	-0.602521	0.84353	[- +]	LPCAT18c1c18c1	0	0	-5.5988e-13	6.82336e-12	0	LPCAT18c1c18c1	-0.366467	0	-1.46074	4.19643	[- +]	LPCAT18c1c18c1	0.794011	0.244311	-0.610778	0.855089	[- +]
LPCAT18c1c18c2	-2.61525e-23	0	1.44813e-13	4.65844e-12	0	LPCAT18c1c18c2	0.421765	0	-1.44605	9.36933	[- +]	LPCAT18c1c18c2	-1.14479	0	-1.20504	1.44605	[- +]	LPCAT18c1c18c2	0	0	-1.05787e-13	9.53046e-12	0	LPCAT18c1c18c2	0	0	-1.46587	4.44074	[- +]	LPCAT18c1c18c2	-1.19102	-0.244311	-1.22156	1.46587	[- +]
LPCAT18c1c18c3	1.33874e-24	0	1.89197e-13	-3.76032e-12	0	LPCAT18c1c18c3	-9.40086e-31	0	-1.08454	8.5258	[- +]	LPCAT18c1c18c3	0.301261	-0.241009	-1.08454	0.602521	[- +]	LPCAT18c1c18c3	0	0	-2.169e-13	5.01017e-12	0	LPCAT18c1c18c3	0.488622	0	-1.0994	3.58565	[- +]	LPCAT18c1c18c3	0.397005	0	-1.0994	0.610778	[- +]
LPCAT18c2c18c2	8.70248e-25	0	-9.01771e-14	3.5662e-12	0	LPCAT18c2c18c2	-0.421765	0	-1.44605	9.12832	[- +]	LPCAT18c2c18c2	0.180756	-9.07988e-33	-0.602521	1.20504	[- +]	LPCAT18c2c18c2	0	0	-3.16496e-14	7.42236e-12	0	LPCAT18c2c18c2	3.48714e-31	0	-1.46074	4.19643	[- +]	LPCAT18c2c18c2	0	-7.2639e-33	-0.610778	1.22156	[- +]
LPCAT18c2c18c3	-8.6727e-25	0	-1.08878e-13	8.68532e-13	0	LPCAT18c2c18c3	0.421765	0	-2.5306	8.5258	[- +]	LPCAT18c2c18c3	-0.180756	0	-1.20504	0.602521	[- +]	LPCAT18c2c18c3	0	0	-3.10662e-13	4.65407e-12	0	LPCAT18c2c18c3	-3.48808e-31	0	-2.11515	3.58565	[- +]	LPCAT18c2c18c3	0	-2.27832e-32	-1.22156	0.610778	[- +]
LPCAT18c3c18c3	1.09986e-23	0	5.43191e-25	2.58923e-12	0	LPCAT18c3c18c3	-1.69146e-29	0	-7.43123e-25	8.5258	[0 +]	LPCAT18c3c18c3	0.241009	0	0	0.602521	[0 +]	LPCAT18c3c18c3	0	0	1.22238e-23	1.48416e-11	0	LPCAT18c3c18c3	-1.41704e-30	0	5.87418e-21	3.58565	[0 +]	LPCAT18c3c18c3	0.152694	4.49855e-32	1.4058e-33	0.610778	[0 +]
MALATEDEHRXNmitochondrion	0.862069	0.862069	0.862069	0.862069	+	MALATEDEHRXNmitochondrion	-2.67994e-13	4.59126e-16	-0.000160697	5.35655e-05	[- +]	MALATEDEHRXNmitochondrion	-6.4595e-13	1.42414e-12	5.79647e-16	-4.233e-13	0	MALATEDEHRXNmitochondrion	-7.06897	-7.06897	-7.06897	-7.06897	-	MALATEDEHRXNmitochondrion	-10.1145	-10.1145	-10.1146	-10.1143	[- -]	MALATEDEHRXNmitochondrion	-10.1145	-10.1145	-10.1145	-10.1145	-
MALATEDEHYDROGENASENADPRXNchloroplast	-899.138	-0.431034	-899.138	-0.431034	[- -]	MALATEDEHYDROGENASENADPRXNchloroplast	-914.924	1.32555	-928.963	31.3918	[- +]	MALATEDEHYDROGENASENADPRXNchloroplast	-913.116	-0.301261	-913.116	-0.301261	[- -]	MALATEDEHYDROGENASENADPRXNchloroplast	-1.46552	2.93103	-847.069	8.53448	[- +]	MALATEDEHYDROGENASENADPRXNchloroplast	-10.6031	0	-867.303	21.7085	[- +]	MALATEDEHYDROGENASENADPRXNchloroplast	-851.239	1.34371	-861.353	9.80909	[- +]
MalateDH	-900	-1.2931	-900	-1.2931	[- -]	MalateDH	-922.245	-0.482017	-928.963	31.3918	[- +]	MalateDH	-913.116	-0.301261	-913.116	-0.301261	[- -]	MalateDH	-4.39655	-1.25599e-29	-850	5.60345	[- +]	MalateDH	-16.5521	4.11664	-867.303	21.7083	[- +]	MalateDH	-861.353	1.34371	-861.353	9.80909	[- +]
MalateDHPeroxisome	1.10085e-23	7.84206e-32	-5.59413e-13	-1.34264e-13	0	MalateDHPeroxisome	2.27333e-28	0	-3.42819e-05	3.57103e-06	[- +]	MalateDHPeroxisome	-2.26811e-27	1.15695e-30	-3.87165e-13	7.44383e-14	0	MalateDHPeroxisome	10	10	10	10	+	MalateDHPeroxisome	10.1145	5.99784	4.16472	16.0642	[+ +]	MalateDHPeroxisome	10.1145	10.1145	10.1145	10.1145	+
MalateSynthasePeroxisome	-6.1912e-24	-4.09076e-32	0	0	0	MalateSynthasePeroxisome	0	0	0	1.94784e-05	[0 +]	MalateSynthasePeroxisome	0	0	0	8.26361e-13	0	MalateSynthasePeroxisome	-1.15296e-30	-3.92969e-15	0	0	0	MalateSynthasePeroxisome	0	0	0	6.05468e-05	[0 +]	MalateSynthasePeroxisome	0	0	0	1.55375e-12	0
MALICNADPRXN	0	-1.55798e-16	0	0	0	MALICNADPRXN	0.602521	0	0	15.8466	[0 +]	MALICNADPRXN	-2.60211e-13	0	0	1.50014e-13	0	MALICNADPRXN	-3.29308e-13	0	0	1.96452e-11	0	MALICNADPRXN	5.94897	-4.84751e-15	0	16.0642	[0 +]	MALICNADPRXN	10.1145	-4.24136e-15	0	10.1145	[0 +]
MALICNADPRXNchloroplast	0	0	0	0	0	MALICNADPRXNchloroplast	0	0	0	15.8466	[0 +]	MALICNADPRXNchloroplast	0	0	0	8.06613e-12	0	MALICNADPRXNchloroplast	0	0	0	1.24718e-11	0	MALICNADPRXNchloroplast	0	0	0	5.94975	[0 +]	MALICNADPRXNchloroplast	0	0	0	5.62185e-12	0
MALONYLCOAACPTRANSACYLRXN	-2.10255e-25	-2.71569e-32	0	0	0	MALONYLCOAACPTRANSACYLRXN	14.2195	14.2195	14.2195	14.2195	[+ +]	MALONYLCOAACPTRANSACYLRXN	14.2195	14.2195	14.2195	14.2195	+	MALONYLCOAACPTRANSACYLRXN	1.28107e-31	0	0	1.39955e-12	0	MALONYLCOAACPTRANSACYLRXN	14.4144	14.4144	14.4143	14.4144	[+ +]	MALONYLCOAACPTRANSACYLRXN	14.4144	14.4144	14.4144	14.4144	+
MannoseTransfermod	0	0	0	0	0	MannoseTransfermod	0	3.98078e-15	0	1.20813e-07	0	MannoseTransfermod	0	0	0	0	0	MannoseTransfermod	0	0	0	0	0	MannoseTransfermod	0	0	0	2.2055e-07	0	MannoseTransfermod	0	0	0	3.09848e-17	0
MANNPISOMRXN	0	0	0	0	0	MANNPISOMRXN	0	0	0	7.92328	[0 +]	MANNPISOMRXN	0	0	0	2.28513e-12	0	MANNPISOMRXN	0	-1.65079e-28	0	8.53599e-12	0	MANNPISOMRXN	0	0	0	2.97488	[0 +]	MANNPISOMRXN	0	0	0	5.46047e-12	0
MDHFerredoxinReductionchloroplast	0	0	0	0	0	MDHFerredoxinReductionchloroplast	0	0	0	5.42993e-05	[0 +]	MDHFerredoxinReductionchloroplast	6.35446e-28	0	0	9.6081e-13	0	MDHFerredoxinReductionchloroplast	0	0	0	3.99231e-12	0	MDHFerredoxinReductionchloroplast	0	0	0	0.000164181	[0 +]	MDHFerredoxinReductionchloroplast	0	0	0	0	0
MehlerReactionchloroplast	0	0	0	0	0	MehlerReactionchloroplast	0	0	0	5.42993e-05	[0 +]	MehlerReactionchloroplast	5.3415e-28	0	0	9.6081e-13	0	MehlerReactionchloroplast	0	0	0	3.99231e-12	0	MehlerReactionchloroplast	0	0	0	0.000164181	[0 +]	MehlerReactionchloroplast	0	0	0	0	0
METHENYLTHFCYCLOHYDRORXNChloroplast	0	0	0	0	0	METHENYLTHFCYCLOHYDRORXNChloroplast	0	7.78121e-16	0	2.4348e-06	[0 +]	METHENYLTHFCYCLOHYDRORXNChloroplast	0	0	0	0	0	METHENYLTHFCYCLOHYDRORXNChloroplast	0	0	0	0	0	METHENYLTHFCYCLOHYDRORXNChloroplast	0	0	0	5.43499e-06	[0 +]	METHENYLTHFCYCLOHYDRORXNChloroplast	0	0	0	0	0
METHYLENETHFDEHYDROGNADPRXNChloroplast	0	0	0	3.56129e-13	0	METHYLENETHFDEHYDROGNADPRXNChloroplast	0	7.78121e-16	0	2.4348e-06	[0 +]	METHYLENETHFDEHYDROGNADPRXNChloroplast	0	0	0	-1.11653e-13	0	METHYLENETHFDEHYDROGNADPRXNChloroplast	0	0	0	-1.24361e-13	0	METHYLENETHFDEHYDROGNADPRXNChloroplast	0	0	0	5.43499e-06	[0 +]	METHYLENETHFDEHYDROGNADPRXNChloroplast	0	0	0	-1.446e-13	0
MEVALONATEKINASERXN	-1.74187e-24	0	0	0	0	MEVALONATEKINASERXN	0	0	0	0	0	MEVALONATEKINASERXN	0	0	0	0	0	MEVALONATEKINASERXN	0	0	0	0	0	MEVALONATEKINASERXN	0	0	0	0	0	MEVALONATEKINASERXN	0	0	0	0	0
mitochondrionammoniaexchange	-5.72672e-14	1.3025e-16	1.99265e-12	0	0	mitochondrionammoniaexchange	-5.51772e-14	-4.89819e-15	-2.67828e-05	0	[- 0]	mitochondrionammoniaexchange	-4.42729e-14	0	-9.45551e-13	-1.72137e-13	0	mitochondrionammoniaexchange	-10	-10	-10	-10	-	mitochondrionammoniaexchange	-10.1145	-10.1145	-10.1145	-10.1145	[- -]	mitochondrionammoniaexchange	-10.1145	-10.1145	-10.1145	-10.1145	-
MitochondrionAspGluExchange	999.138	0	-1000	999.138	[-1000 +]	MitochondrionAspGluExchange	1000	-2.72347e-15	-1000	1000	[-1000 +1000]	MitochondrionAspGluExchange	1000	0	-1000	1000	[-1000 +1000]	MitochondrionAspGluExchange	1000	3.92969e-15	-992.931	1000	[- +1000]	MitochondrionAspGluExchange	1000	0	-989.886	1000	[- +1000]	MitochondrionAspGluExchange	1000	0	-989.886	1000	[- +1000]
mitochondrionATPADPexchange	2.87356	2.87356	2.87356	2.87356	+	mitochondrionATPADPexchange	1.03247e-13	-3.34832e-15	-1.10066e-25	0.000178552	[0 +]	mitochondrionATPADPexchange	-3.59555e-12	4.74715e-12	1.08628e-27	-4.70992e-12	0	mitochondrionATPADPexchange	9.77011	9.77011	9.77011	9.77011	+	mitochondrionATPADPexchange	-1.09521e-13	0	0	0.000539876	[0 +]	mitochondrionATPADPexchange	-1.79688e-11	-1.85235e-11	8.51079e-28	-1.50245e-11	0
mitochondrioncisaconitateexchange	0	0	0	0	0	mitochondrioncisaconitateexchange	0	0	0	0	0	mitochondrioncisaconitateexchange	0	0	0	0	0	mitochondrioncisaconitateexchange	0	0	0	0	0	mitochondrioncisaconitateexchange	0	0	0	0	0	mitochondrioncisaconitateexchange	0	0	0	0	0
mitochondrioncitrateexchange	0	0	-1.27862e-14	0	0	mitochondrioncitrateexchange	5.71179e-16	0	2.10125e-16	0	0	mitochondrioncitrateexchange	0	0	-3.31496e-13	0	0	mitochondrioncitrateexchange	0	0	-1.14849e-13	-1.87889e-26	0	mitochondrioncitrateexchange	1.71837e-16	0	-8.26999e-20	0	0	mitochondrioncitrateexchange	0	0	-2.34988e-13	0	0
mitochondrionCO2exchange	-2.02086e-13	-8.51615e-18	-2.39423e-12	3.75074e-26	0	mitochondrionCO2exchange	-2.67994e-13	-1.54987e-15	-0.000160697	4.45146e-24	[- 0]	mitochondrionCO2exchange	2.06773e-13	0	-1.61198e-12	-7.7753e-14	0	mitochondrionCO2exchange	-10	-10	-10	-10	-	mitochondrionCO2exchange	-10.1145	-10.1145	-10.1146	-10.1145	[- -]	mitochondrionCO2exchange	-10.1145	-10.1145	-10.1145	-10.1145	-
mitochondrionfumarateexchange	6.45545e-26	-1.21734e-16	-9.6471e-13	2.93175e-25	0	mitochondrionfumarateexchange	2.26007e-14	9.10207e-15	-2.64109	0	[- 0]	mitochondrionfumarateexchange	-6.38553e-26	0	1.94539e-12	-6.38553e-26	0	mitochondrionfumarateexchange	0	-1.28126e-15	-3.20499e-12	3.72878e-26	0	mitochondrionfumarateexchange	0	0	-0.991625	-2.22746e-21	[- 0]	mitochondrionfumarateexchange	0	0	-2.26189e-12	0	0
mitochondrionglycineexchange	1.14534e-13	-2.60499e-16	0	-3.9853e-12	0	mitochondrionglycineexchange	1.10354e-13	9.79637e-15	2.17501e-25	5.35655e-05	[0 +]	mitochondrionglycineexchange	8.85457e-14	0	3.44273e-13	1.8911e-12	0	mitochondrionglycineexchange	20	20	20	20	+	mitochondrionglycineexchange	20.229	20.229	20.2289	20.229	[+ +]	mitochondrionglycineexchange	20.229	20.229	20.229	20.229	+
mitochondrionisocitrateexchange	-1.44819e-13	-2.88045e-31	1.67816e-12	-3.49421e-26	0	mitochondrionisocitrateexchange	-1.10141e-13	0	-5.35655e-05	-2.76416e-25	[- 0]	mitochondrionisocitrateexchange	5.06465e-25	0	-6.43471e-13	5.06465e-25	0	mitochondrionisocitrateexchange	-4.74711e-13	0	-1.98912e-12	0	0	mitochondrionisocitrateexchange	-1.09521e-13	-4.3732e-15	-5.78438e-05	0	[- 0]	mitochondrionisocitrateexchange	-1.07133e-13	-4.75876e-15	-1.65465e-12	1.65446e-29	0
mitochondrionmalateexchange	0.862069	0.862069	0.862069	0.862069	+	mitochondrionmalateexchange	-2.45393e-13	1.29095e-14	-2.64124	5.35655e-05	[- +]	mitochondrionmalateexchange	-3.94904e-13	1.42414e-12	-4.76438e-12	-7.84502e-14	0	mitochondrionmalateexchange	-7.06897	-7.06897	-7.06897	-7.06897	-	mitochondrionmalateexchange	-10.1145	-10.1145	-11.1061	-10.1143	[- -]	mitochondrionmalateexchange	-10.1145	-10.1145	-10.1145	-10.1145	-
mitochondrionO2exchange	0.431034	0.431034	0.431034	0.431034	+	mitochondrionO2exchange	0	-6.69664e-16	3.79909e-25	2.67828e-05	[0 +]	mitochondrionO2exchange	-5.51885e-13	7.12072e-13	-4.65487e-14	-1.17116e-12	0	mitochondrionO2exchange	1.46552	1.46552	1.46552	1.46552	+	mitochondrionO2exchange	0	0	-1.4185e-24	8.09814e-05	[0 +]	mitochondrionO2exchange	-2.67925e-12	-2.77709e-12	0	-2.23278e-12	0
mitochondrionorotateexchange	0	0	0	0	0	mitochondrionorotateexchange	0	0	0	0	0	mitochondrionorotateexchange	0	0	0	0	0	mitochondrionorotateexchange	0	0	0	0	0	mitochondrionorotateexchange	0	0	0	0	0	mitochondrionorotateexchange	0	0	0	0	0
mitochondrionoxaloacetateexchange	-1000	-0.862069	-1000	999.138	[-1000 +]	mitochondrionoxaloacetateexchange	-1000	2.26434e-15	-1000	1000	[-1000 +1000]	mitochondrionoxaloacetateexchange	-1000	-1.42414e-12	-1000	1000	[-1000 +1000]	mitochondrionoxaloacetateexchange	-992.931	7.06897	-1000	1000	[-1000 +1000]	mitochondrionoxaloacetateexchange	-989.886	10.1145	-1000	1000	[-1000 +1000]	mitochondrionoxaloacetateexchange	-989.886	10.1145	-1000	1000	[-1000 +1000]
mitochondrionoxoglutarateexchange	999.138	1.38766e-16	-1000	999.138	[-1000 +]	mitochondrionoxoglutarateexchange	1000	-6.07179e-15	-1000	1000	[-1000 +1000]	mitochondrionoxoglutarateexchange	1000	0	-1000	1000	[-1000 +1000]	mitochondrionoxoglutarateexchange	1000	1.69717e-30	-992.931	1000	[- +1000]	mitochondrionoxoglutarateexchange	1000	0	-989.886	1000	[- +1000]	mitochondrionoxoglutarateexchange	1000	-9.51752e-15	-989.886	1000	[- +1000]
mitochondrionprotonexchange	2.87356	2.87356	2.87356	2.87356	+	mitochondrionprotonexchange	1.03247e-13	-3.34832e-15	2.62006e-25	0.000214262	[0 +]	mitochondrionprotonexchange	-3.59555e-12	4.74715e-12	1.20935e-25	-4.05326e-12	0	mitochondrionprotonexchange	9.77011	9.77011	9.77011	9.77011	+	mitochondrionprotonexchange	-1.12383e-13	-1.60438e-15	-1.36536e-15	0.000539876	[0 +]	mitochondrionprotonexchange	-1.79701e-11	-1.85246e-11	-9.0063e-16	-1.50256e-11	0
mitochondrionpyruvateexchange	1.44819e-13	0	1.43642e-26	-2.84497e-12	0	mitochondrionpyruvateexchange	1.0957e-13	-8.03109e-31	-2.67174e-24	5.35655e-05	[0 +]	mitochondrionpyruvateexchange	-5.04958e-25	0	-5.04958e-25	4.427e-13	0	mitochondrionpyruvateexchange	4.74711e-13	8.03109e-31	1.63531e-25	1.98912e-12	0	mitochondrionpyruvateexchange	1.09349e-13	4.3732e-15	1.72469e-20	5.78438e-05	[0 +]	mitochondrionpyruvateexchange	1.07133e-13	4.75876e-15	-3.24792e-28	7.68554e-13	0
mitochondrionserineexchange	-5.72672e-14	1.3025e-16	1.99265e-12	0	0	mitochondrionserineexchange	-5.51772e-14	-4.89819e-15	-2.67828e-05	0	[- 0]	mitochondrionserineexchange	-4.42729e-14	0	-9.45551e-13	-1.72137e-13	0	mitochondrionserineexchange	-10	-10	-10	-10	-	mitochondrionserineexchange	-10.1145	-10.1145	-10.1145	-10.1145	[- -]	mitochondrionserineexchange	-10.1145	-10.1145	-10.1145	-10.1145	-
mitochondrionsuccinateexchange	5.07114e-24	-1.38766e-16	5.07784e-14	-1.14184e-12	0	mitochondrionsuccinateexchange	-1.25847e-13	-9.10207e-15	-6.9029e-25	2.6411	[0 +]	mitochondrionsuccinateexchange	-2.48896e-25	0	-2.48896e-25	1.05359e-11	0	mitochondrionsuccinateexchange	0	5.21094e-15	6.78638e-25	1.16533e-11	0	mitochondrionsuccinateexchange	1.09521e-13	0	2.22746e-21	0.991625	[0 +]	mitochondrionsuccinateexchange	1.07133e-13	9.51752e-15	-1.85711e-28	2.48072e-12	0
mitochondrionwaterexchange	-3.73563	-3.73563	-3.73563	-3.73563	-	mitochondrionwaterexchange	1.42147e-13	-6.21288e-15	-0.000232117	2.64107	[- +]	mitochondrionwaterexchange	4.2415e-12	-6.17129e-12	5.19672e-12	5.8265e-13	0	mitochondrionwaterexchange	-2.70115	-2.70115	-2.70115	-2.70115	-	mitochondrionwaterexchange	10.1145	10.1145	10.1138	11.106	[+ +]	mitochondrionwaterexchange	10.1145	10.1145	10.1145	10.1145	+
MYOINOSITOL1KINASERXN	0	0	0	0	0	MYOINOSITOL1KINASERXN	0	0	0	15.8466	[0 +]	MYOINOSITOL1KINASERXN	0	0	0	1.42074e-12	0	MYOINOSITOL1KINASERXN	0	0	0	1.89042e-11	0	MYOINOSITOL1KINASERXN	0	0	0	5.94975	[0 +]	MYOINOSITOL1KINASERXN	0	0	0	8.39917e-12	0
MYOINOSITOL1PHOSPHATESYNTHASERXNalpha	0	0	0	0	0	MYOINOSITOL1PHOSPHATESYNTHASERXNalpha	0	0	0	0	0	MYOINOSITOL1PHOSPHATESYNTHASERXNalpha	0	0	0	0	0	MYOINOSITOL1PHOSPHATESYNTHASERXNalpha	0	0	0	0	0	MYOINOSITOL1PHOSPHATESYNTHASERXNalpha	0	0	0	0	0	MYOINOSITOL1PHOSPHATESYNTHASERXNalpha	0	0	0	0	0
MYOINOSITOL1PHOSPHATESYNTHASERXNbeta	0	0	0	0	0	MYOINOSITOL1PHOSPHATESYNTHASERXNbeta	0	0	0	0	0	MYOINOSITOL1PHOSPHATESYNTHASERXNbeta	2.17086e-24	0	0	0	0	MYOINOSITOL1PHOSPHATESYNTHASERXNbeta	0	0	0	0	0	MYOINOSITOL1PHOSPHATESYNTHASERXNbeta	0	0	0	0	0	MYOINOSITOL1PHOSPHATESYNTHASERXNbeta	0	0	0	0	0
NACETYLGLUTPREDUCTRXNChloroplast	-6.46739e-26	1.21734e-16	0	0	0	NACETYLGLUTPREDUCTRXNChloroplast	-2.26007e-14	-9.88019e-15	0	2.64109	[0 +]	NACETYLGLUTPREDUCTRXNChloroplast	6.39505e-26	0	0	0	0	NACETYLGLUTPREDUCTRXNChloroplast	0	1.28126e-15	0	3.20499e-12	0	NACETYLGLUTPREDUCTRXNChloroplast	0	0	0	0.991625	[0 +]	NACETYLGLUTPREDUCTRXNChloroplast	0	0	0	2.26189e-12	0
NACETYLTRANSFERRXNChloroplast	0	0	0	0	0	NACETYLTRANSFERRXNChloroplast	0	-1.48704e-30	0	2.26379	[0 +]	NACETYLTRANSFERRXNChloroplast	0	0	0	2.41037e-13	0	NACETYLTRANSFERRXNChloroplast	0	4.64699e-32	0	9.61381e-13	0	NACETYLTRANSFERRXNChloroplast	0	0	0	0.849964	[0 +]	NACETYLTRANSFERRXNChloroplast	0	0	0	2.64727e-12	0
NITRATEREDUCTASENADHRXN	0	0	0	0	0	NITRATEREDUCTASENADHRXN	0	0	0	7.93563e-06	[0 +]	NITRATEREDUCTASENADHRXN	0	0	0	6.92975e-14	0	NITRATEREDUCTASENADHRXN	0	0	0	3.60326e-14	0	NITRATEREDUCTASENADHRXN	0	-3.19055e-16	9.84579e-14	1.8943e-05	[0 +]	NITRATEREDUCTASENADHRXN	0	0	0	0	0
NitrogenousBiomassSink	0	0	0	0	0	NitrogenousBiomassSink	0	0	0	0	0	NitrogenousBiomassSink	0	0	0	0	0	NitrogenousBiomassSink	0	0	0	0	0	NitrogenousBiomassSink	0	0	0	0	0	NitrogenousBiomassSink	0	0	0	0	0
Nmethylphosphoethanolaminecytidylyltransferase	0	0	0	0	0	Nmethylphosphoethanolaminecytidylyltransferase	0	0	0	0	0	Nmethylphosphoethanolaminecytidylyltransferase	0	0	0	0	0	Nmethylphosphoethanolaminecytidylyltransferase	0	0	0	0	0	Nmethylphosphoethanolaminecytidylyltransferase	0	0	0	0	0	Nmethylphosphoethanolaminecytidylyltransferase	0	0	0	0	0
Nmonomethylethanolaminemethyltransferase	-2.52815e-16	0	0	0	0	Nmonomethylethanolaminemethyltransferase	7.10266e-17	1.39192e-15	0	4.3198e-07	0	Nmonomethylethanolaminemethyltransferase	-1.77596e-16	0	0	0	0	Nmonomethylethanolaminemethyltransferase	0	0	0	2.37922e-14	0	Nmonomethylethanolaminemethyltransferase	0	0	0	8.18821e-07	0	Nmonomethylethanolaminemethyltransferase	0	0	0	1.73365e-14	0
NucleicAcidSink	0	0	0	0	0	NucleicAcidSink	0	0	0	0	0	NucleicAcidSink	0	0	0	0	0	NucleicAcidSink	0	0	0	0	0	NucleicAcidSink	0	0	0	0	0	NucleicAcidSink	0	0	0	0	0
OHMETHYLBILANESYNRXN	0	0	0	0	0	OHMETHYLBILANESYNRXN	0	0	0	0	0	OHMETHYLBILANESYNRXN	0	0	0	0	0	OHMETHYLBILANESYNRXN	0	0	0	0	0	OHMETHYLBILANESYNRXN	0	0	0	0	0	OHMETHYLBILANESYNRXN	0	0	0	0	0
OleateKETOACYLCOATHIOLRXN	0	0	0	0	0	OleateKETOACYLCOATHIOLRXN	0	0	0	3.96782e-06	[0 +]	OleateKETOACYLCOATHIOLRXN	0	0	0	2.02426e-13	0	OleateKETOACYLCOATHIOLRXN	0	0	0	2.75018e-13	0	OleateKETOACYLCOATHIOLRXN	-9.19246e-31	2.15487e-13	0	6.42709e-06	[0 +]	OleateKETOACYLCOATHIOLRXN	0	0	0	5.61836e-14	0
OleoylCoASynthesis	1.70425e-24	0	0	0	0	OleoylCoASynthesis	1.56656	1.56656	1.56655	9.48984	[+ +]	OleoylCoASynthesis	1.56656	1.56656	1.56656	1.56656	+	OleoylCoASynthesis	0	0	0	6.80651e-12	0	OleoylCoASynthesis	1.58802	1.58802	1.58802	4.5629	[+ +]	OleoylCoASynthesis	1.58802	1.58802	1.58802	1.58802	+
OleoylLinolenoylDiacylglycerolSink	0	0	0	0	0	OleoylLinolenoylDiacylglycerolSink	0	0	0	0	0	OleoylLinolenoylDiacylglycerolSink	0	0	0	0	0	OleoylLinolenoylDiacylglycerolSink	0	0	0	0	0	OleoylLinolenoylDiacylglycerolSink	0	0	0	0	0	OleoylLinolenoylDiacylglycerolSink	0	0	0	0	0
OleoylLinolenoylPhosphatidylCholineSink	0	0	0	0	0	OleoylLinolenoylPhosphatidylCholineSink	0	0	0	4.02748e-07	0	OleoylLinolenoylPhosphatidylCholineSink	0	0	0	6.4284e-15	0	OleoylLinolenoylPhosphatidylCholineSink	0	0	0	2.40569e-14	0	OleoylLinolenoylPhosphatidylCholineSink	0	0	0	7.69785e-07	0	OleoylLinolenoylPhosphatidylCholineSink	0	0	0	2.27201e-14	0
OleoylLinoleoylDiacylglycerolSink	0	0	0	0	0	OleoylLinoleoylDiacylglycerolSink	0	0	0	0	0	OleoylLinoleoylDiacylglycerolSink	0	0	0	0	0	OleoylLinoleoylDiacylglycerolSink	0	0	0	0	0	OleoylLinoleoylDiacylglycerolSink	0	0	0	0	0	OleoylLinoleoylDiacylglycerolSink	0	0	0	0	0
OleoylLinoleoylPhosphatidylCholineSink	0	0	0	0	0	OleoylLinoleoylPhosphatidylCholineSink	0	3.34521e-17	0	4.05799e-07	0	OleoylLinoleoylPhosphatidylCholineSink	0	0	0	5.95038e-15	0	OleoylLinoleoylPhosphatidylCholineSink	0	0	0	4.25433e-14	0	OleoylLinoleoylPhosphatidylCholineSink	0	0	0	7.73461e-07	0	OleoylLinoleoylPhosphatidylCholineSink	0	0	0	2.49893e-14	0
OleoylOleoylDiacylglycerolSink	0	0	0	0	0	OleoylOleoylDiacylglycerolSink	0	0	0	0	0	OleoylOleoylDiacylglycerolSink	0	0	0	0	0	OleoylOleoylDiacylglycerolSink	0	0	0	0	0	OleoylOleoylDiacylglycerolSink	0	0	0	0	0	OleoylOleoylDiacylglycerolSink	0	0	0	0	0
OleoylOleoylPhosphatidylCholineSink	0	0	0	0	0	OleoylOleoylPhosphatidylCholineSink	0	0	0	0	0	OleoylOleoylPhosphatidylCholineSink	0	0	0	0	0	OleoylOleoylPhosphatidylCholineSink	0	0	0	0	0	OleoylOleoylPhosphatidylCholineSink	0	0	0	0	0	OleoylOleoylPhosphatidylCholineSink	0	0	0	0	0
OrganicAcidsSink	0	0	0	0	0	OrganicAcidsSink	0	0	0	0	0	OrganicAcidsSink	0	0	0	0	0	OrganicAcidsSink	0	0	0	0	0	OrganicAcidsSink	0	0	0	0	0	OrganicAcidsSink	0	0	0	0	0
ORNCARBAMTRANSFERRXNChloroplast	-6.46901e-26	1.21734e-16	-2.92773e-25	9.6471e-13	0	ORNCARBAMTRANSFERRXNChloroplast	-2.26007e-14	-9.88019e-15	0	2.64109	[0 +]	ORNCARBAMTRANSFERRXNChloroplast	6.38565e-26	0	6.38565e-26	-1.94539e-12	0	ORNCARBAMTRANSFERRXNChloroplast	0	1.28126e-15	-3.73469e-26	3.20499e-12	0	ORNCARBAMTRANSFERRXNChloroplast	0	0	2.22746e-21	0.991625	[0 +]	ORNCARBAMTRANSFERRXNChloroplast	0	0	0	2.26189e-12	0
ORNITHINEGLUAMINOTRANSFORASERXN	-8.85819e-26	-1.04465e-32	0	-7.89682e-13	0	ORNITHINEGLUAMINOTRANSFORASERXN	0	0	0	2.64109	[0 +]	ORNITHINEGLUAMINOTRANSFORASERXN	6.39135e-26	0	-1.47169e-27	-1.94539e-12	0	ORNITHINEGLUAMINOTRANSFORASERXN	0	3.65379e-32	-3.49002e-26	3.24216e-12	0	ORNITHINEGLUAMINOTRANSFORASERXN	4.2082e-14	0	2.22746e-21	0.991625	[0 +]	ORNITHINEGLUAMINOTRANSFORASERXN	2.28721e-14	-7.22789e-16	-5.14655e-29	1.17994e-12	0
OROPRIBTRANSRXN	0	0	0	0	0	OROPRIBTRANSRXN	0	0	0	0	0	OROPRIBTRANSRXN	0	0	0	0	0	OROPRIBTRANSRXN	0	0	0	0	0	OROPRIBTRANSRXN	0	0	0	0	0	OROPRIBTRANSRXN	0	0	0	0	0
OROTPDECARBRXN	0	0	0	0	0	OROTPDECARBRXN	0	0	0	0	0	OROTPDECARBRXN	0	0	0	0	0	OROTPDECARBRXN	0	0	0	0	0	OROTPDECARBRXN	0	0	0	0	0	OROTPDECARBRXN	0	0	0	0	0
OXALATEOXIDASERXN	0	0	0	0	0	OXALATEOXIDASERXN	0	0	0	2.67828e-05	[0 +]	OXALATEOXIDASERXN	0	0	0	4.91271e-14	0	OXALATEOXIDASERXN	0	0	0	0	0	OXALATEOXIDASERXN	0	0	0	8.09814e-05	[0 +]	OXALATEOXIDASERXN	0	0	0	0	0
OXALOACETASERXNMOD	0	0	0	0	0	OXALOACETASERXNMOD	0	0	0	2.67828e-05	[0 +]	OXALOACETASERXNMOD	0	0	0	4.91271e-14	0	OXALOACETASERXNMOD	0	0	0	0	0	OXALOACETASERXNMOD	-7.22284e-28	0	0	8.09814e-05	[0 +]	OXALOACETASERXNMOD	0	0	0	0	0
OxoC10c0CoAKAT	0	-3.39461e-33	0	1.07192e-13	0	OxoC10c0CoAKAT	1.83638e-27	0	0	4.86959e-06	[0 +]	OxoC10c0CoAKAT	-1.49057e-27	-2.96369e-31	0	2.0659e-13	0	OxoC10c0CoAKAT	-1.28107e-31	0	0	-4.34249e-15	0	OxoC10c0CoAKAT	-6.316e-30	-2.69359e-14	-1.82494e-21	7.56835e-06	[0 +]	OxoC10c0CoAKAT	0	0	0	1.96301e-13	0
OxoC10c1d4cisCoAKAT	5.41498e-24	0	0	-1.37984e-13	0	OxoC10c1d4cisCoAKAT	-1.69742e-29	0	0	3.69417e-06	[0 +]	OxoC10c1d4cisCoAKAT	0	0	0	3.64589e-14	0	OxoC10c1d4cisCoAKAT	0	-9.23685e-30	5.97493e-27	6.77316e-14	0	OxoC10c1d4cisCoAKAT	-3.55275e-30	0	0	6.18178e-06	[0 +]	OxoC10c1d4cisCoAKAT	0	0	0	1.00771e-13	0
OxoC10c2d4cis7cisCoAKAT	-6.79015e-24	0	-1.01813e-14	7.19721e-14	0	OxoC10c2d4cis7cisCoAKAT	-1.61532e-27	0	0	3.45584e-06	[0 +]	OxoC10c2d4cis7cisCoAKAT	1.58531e-27	0	1.58531e-27	-1.59753e-13	0	OxoC10c2d4cis7cisCoAKAT	0	0	-1.59084e-13	2.15589e-13	0	OxoC10c2d4cis7cisCoAKAT	4.14487e-30	0	0	5.95451e-06	[0 +]	OxoC10c2d4cis7cisCoAKAT	0	0	0	1.50925e-13	0
OxoC12c0CoAKAT	0	-3.39461e-33	0	1.07192e-13	0	OxoC12c0CoAKAT	1.83795e-27	0	0	4.86959e-06	[0 +]	OxoC12c0CoAKAT	-1.48426e-27	-3.95159e-31	0	2.0659e-13	0	OxoC12c0CoAKAT	-1.28107e-31	0	0	-4.34249e-15	0	OxoC12c0CoAKAT	-6.51337e-30	-2.69359e-14	-1.82494e-21	7.56835e-06	[0 +]	OxoC12c0CoAKAT	0	0	0	1.96301e-13	0
OxoC12c1d6cisCoAKAT	5.41579e-24	0	0	-1.37984e-13	0	OxoC12c1d6cisCoAKAT	-1.7369e-29	0	0	3.69417e-06	[0 +]	OxoC12c1d6cisCoAKAT	0	0	0	3.64589e-14	0	OxoC12c1d6cisCoAKAT	0	-9.23685e-30	5.9623e-27	6.77316e-14	0	OxoC12c1d6cisCoAKAT	-3.158e-30	0	0	6.18178e-06	[0 +]	OxoC12c1d6cisCoAKAT	0	0	0	1.00771e-13	0
OxoC12c2d6cis9cisCoAKAT	-6.79015e-24	0	-1.01813e-14	7.19721e-14	0	OxoC12c2d6cis9cisCoAKAT	-1.61532e-27	0	0	3.45584e-06	[0 +]	OxoC12c2d6cis9cisCoAKAT	1.58531e-27	0	1.58531e-27	-1.59753e-13	0	OxoC12c2d6cis9cisCoAKAT	0	0	-1.59084e-13	2.15589e-13	0	OxoC12c2d6cis9cisCoAKAT	4.24356e-30	0	0	5.95451e-06	[0 +]	OxoC12c2d6cis9cisCoAKAT	0	0	0	1.50925e-13	0
OxoC14c0CoAKAT	0	-3.39461e-33	0	1.07192e-13	0	OxoC14c0CoAKAT	1.83953e-27	0	0	4.86959e-06	[0 +]	OxoC14c0CoAKAT	-1.48426e-27	-3.95159e-31	0	2.0659e-13	0	OxoC14c0CoAKAT	-1.28107e-31	0	0	-4.34249e-15	0	OxoC14c0CoAKAT	-5.62518e-30	-2.42423e-13	-1.98995e-21	7.56835e-06	[0 +]	OxoC14c0CoAKAT	0	0	3.08398e-33	1.96301e-13	0
OxoC14c1d5cisCoAKAT	0	0	0	-8.28044e-14	0	OxoC14c1d5cisCoAKAT	0	0	0	3.96782e-06	[0 +]	OxoC14c1d5cisCoAKAT	0	0	0	2.02426e-13	0	OxoC14c1d5cisCoAKAT	0	0	0	2.75018e-13	0	OxoC14c1d5cisCoAKAT	-8.49349e-31	2.15487e-13	1.70147e-22	6.42709e-06	[0 +]	OxoC14c1d5cisCoAKAT	0	0	0	5.61836e-14	0
OxoC14c2d5cis8cisCoAKAT	5.41594e-24	0	0	-1.37984e-13	0	OxoC14c2d5cis8cisCoAKAT	-1.7345e-29	0	0	3.69417e-06	[0 +]	OxoC14c2d5cis8cisCoAKAT	0	0	0	3.64589e-14	0	OxoC14c2d5cis8cisCoAKAT	0	-9.26155e-30	5.97635e-27	6.77316e-14	0	OxoC14c2d5cis8cisCoAKAT	-3.22697e-30	0	0	6.18178e-06	[0 +]	OxoC14c2d5cis8cisCoAKAT	0	0	0	1.00771e-13	0
OxoC14c3d5cis8cis11cisCoAKAT	-6.7914e-24	0	-1.01813e-14	7.19721e-14	0	OxoC14c3d5cis8cis11cisCoAKAT	-1.6159e-27	0	0	3.45584e-06	[0 +]	OxoC14c3d5cis8cis11cisCoAKAT	1.58444e-27	0	1.58444e-27	-1.59753e-13	0	OxoC14c3d5cis8cis11cisCoAKAT	0	0	-1.59084e-13	2.15589e-13	0	OxoC14c3d5cis8cis11cisCoAKAT	4.2354e-30	0	0	5.95451e-06	[0 +]	OxoC14c3d5cis8cis11cisCoAKAT	0	0	0	1.50925e-13	0
OxoC16c0CoAKAT	0	-3.39461e-33	0	1.07192e-13	0	OxoC16c0CoAKAT	1.84111e-27	0	0	4.86959e-06	[0 +]	OxoC16c0CoAKAT	-1.4811e-27	-4.93949e-31	0	2.0659e-13	0	OxoC16c0CoAKAT	-1.28107e-31	0	0	-4.34249e-15	0	OxoC16c0CoAKAT	-5.62518e-30	-2.42423e-13	-1.98995e-21	7.56835e-06	[0 +]	OxoC16c0CoAKAT	0	0	3.08398e-33	1.96301e-13	0
OxoC16c1d7cisCoAKAT	0	0	0	-8.28044e-14	0	OxoC16c1d7cisCoAKAT	0	0	0	3.96782e-06	[0 +]	OxoC16c1d7cisCoAKAT	0	0	0	2.02426e-13	0	OxoC16c1d7cisCoAKAT	0	0	0	2.75018e-13	0	OxoC16c1d7cisCoAKAT	-8.63515e-31	2.15487e-13	1.70147e-22	6.42709e-06	[0 +]	OxoC16c1d7cisCoAKAT	0	0	0	5.61836e-14	0
OxoC16c2d7cis10cisCoAKAT	5.4166e-24	0	0	-1.37984e-13	0	OxoC16c2d7cis10cisCoAKAT	-1.7369e-29	0	0	3.69417e-06	[0 +]	OxoC16c2d7cis10cisCoAKAT	0	0	0	3.64589e-14	0	OxoC16c2d7cis10cisCoAKAT	0	-9.28624e-30	5.9623e-27	6.77316e-14	0	OxoC16c2d7cis10cisCoAKAT	-2.3685e-30	0	0	6.18178e-06	[0 +]	OxoC16c2d7cis10cisCoAKAT	0	0	0	1.00771e-13	0
OxoC16c3d7cis10cis13cisCoAKAT	-6.79177e-24	0	-1.01813e-14	7.19721e-14	0	OxoC16c3d7cis10cis13cisCoAKAT	-1.61571e-27	0	0	3.45584e-06	[0 +]	OxoC16c3d7cis10cis13cisCoAKAT	1.579e-27	0	1.579e-27	-1.59753e-13	0	OxoC16c3d7cis10cis13cisCoAKAT	0	0	-1.59084e-13	2.15589e-13	0	OxoC16c3d7cis10cis13cisCoAKAT	4.24356e-30	0	0	5.95451e-06	[0 +]	OxoC16c3d7cis10cis13cisCoAKAT	0	0	0	1.50925e-13	0
OxoC18c0CoAKAT	0	-3.39461e-33	0	1.51639e-13	0	OxoC18c0CoAKAT	0	0	0	4.28524e-06	[0 +]	OxoC18c0CoAKAT	0	-3.95159e-31	0	4.83956e-14	0	OxoC18c0CoAKAT	-1.28107e-31	0	0	5.9654e-14	0	OxoC18c0CoAKAT	0	0	-1.98747e-21	6.69268e-06	[0 +]	OxoC18c0CoAKAT	0	0	0	1.89309e-13	0
OxoC18c1d9cisCoAKAT	0	0	0	-8.28044e-14	0	OxoC18c1d9cisCoAKAT	0	0	0	3.96782e-06	[0 +]	OxoC18c1d9cisCoAKAT	0	0	0	2.02426e-13	0	OxoC18c1d9cisCoAKAT	0	0	0	2.75018e-13	0	OxoC18c1d9cisCoAKAT	-8.88187e-31	2.15487e-13	1.70147e-22	6.42709e-06	[0 +]	OxoC18c1d9cisCoAKAT	0	0	0	5.61836e-14	0
OxoC18c2d9cis12cisCoAKAT	5.41902e-24	0	0	-1.37984e-13	0	OxoC18c2d9cis12cisCoAKAT	-1.81585e-29	0	0	3.69417e-06	[0 +]	OxoC18c2d9cis12cisCoAKAT	0	0	0	3.64589e-14	0	OxoC18c2d9cis12cisCoAKAT	0	-9.28624e-30	5.9623e-27	6.77316e-14	0	OxoC18c2d9cis12cisCoAKAT	-1.579e-30	0	0	6.18178e-06	[0 +]	OxoC18c2d9cis12cisCoAKAT	0	0	0	1.00771e-13	0
OxoC18c3d9cis12cis15cisCoAKAT	-6.79258e-24	0	-1.01813e-14	7.19721e-14	0	OxoC18c3d9cis12cis15cisCoAKAT	-1.61611e-27	0	0	3.45584e-06	[0 +]	OxoC18c3d9cis12cis15cisCoAKAT	1.579e-27	0	1.579e-27	-1.59753e-13	0	OxoC18c3d9cis12cis15cisCoAKAT	0	0	-1.59084e-13	2.15589e-13	0	OxoC18c3d9cis12cis15cisCoAKAT	4.24356e-30	0	0	5.95451e-06	[0 +]	OxoC18c3d9cis12cis15cisCoAKAT	0	0	0	1.50925e-13	0
OxoC18c4d6cis9cis12cis15cisCoAKAT	0	0	0	0	0	OxoC18c4d6cis9cis12cis15cisCoAKAT	0	0	0	0	0	OxoC18c4d6cis9cis12cis15cisCoAKAT	0	0	0	0	0	OxoC18c4d6cis9cis12cis15cisCoAKAT	0	0	0	0	0	OxoC18c4d6cis9cis12cis15cisCoAKAT	0	0	0	0	0	OxoC18c4d6cis9cis12cis15cisCoAKAT	0	0	0	0	0
OxoC20c0CoAKAT	0	0	0	0	0	OxoC20c0CoAKAT	0	0	0	0	0	OxoC20c0CoAKAT	0	0	0	0	0	OxoC20c0CoAKAT	0	0	0	0	0	OxoC20c0CoAKAT	0	0	0	0	0	OxoC20c0CoAKAT	0	0	0	0	0
OxoC20c1d11cisCoAKAT	0	0	0	0	0	OxoC20c1d11cisCoAKAT	0	0	0	0	0	OxoC20c1d11cisCoAKAT	0	0	0	0	0	OxoC20c1d11cisCoAKAT	0	0	0	0	0	OxoC20c1d11cisCoAKAT	0	0	0	0	0	OxoC20c1d11cisCoAKAT	0	0	0	0	0
OxoC20c3d11cis14cis17cisCoAKAT	0	0	0	0	0	OxoC20c3d11cis14cis17cisCoAKAT	0	0	0	0	0	OxoC20c3d11cis14cis17cisCoAKAT	0	0	0	0	0	OxoC20c3d11cis14cis17cisCoAKAT	0	0	0	0	0	OxoC20c3d11cis14cis17cisCoAKAT	0	0	0	0	0	OxoC20c3d11cis14cis17cisCoAKAT	0	0	0	0	0
OxoC22c0CoAKAT	0	0	0	0	0	OxoC22c0CoAKAT	0	0	0	0	0	OxoC22c0CoAKAT	0	0	0	0	0	OxoC22c0CoAKAT	0	0	0	0	0	OxoC22c0CoAKAT	0	0	0	0	0	OxoC22c0CoAKAT	0	0	0	0	0
OxoC22c1d13cisCoAKAT	0	0	0	0	0	OxoC22c1d13cisCoAKAT	0	0	0	0	0	OxoC22c1d13cisCoAKAT	0	0	0	0	0	OxoC22c1d13cisCoAKAT	0	0	0	0	0	OxoC22c1d13cisCoAKAT	0	0	0	0	0	OxoC22c1d13cisCoAKAT	0	0	0	0	0
OxoC4c0CoAKAT	-1.37355e-24	-3.39461e-33	-6.96544e-14	-7.00943e-14	0	OxoC4c0CoAKAT	2.02649e-28	0	0	4.86959e-06	[0 +]	OxoC4c0CoAKAT	9.4346e-29	-3.91921e-31	2.60149e-28	2.0659e-13	0	OxoC4c0CoAKAT	-1.28107e-31	-9.20758e-30	-1.41086e-13	-3.71626e-14	0	OxoC4c0CoAKAT	-3.48913e-30	-2.69359e-14	6.97873e-23	7.56835e-06	[0 +]	OxoC4c0CoAKAT	0	0	0	1.96301e-13	0
OxoC6c0CoAKAT	-1.37355e-24	-3.39461e-33	-6.96544e-14	-7.00943e-14	0	OxoC6c0CoAKAT	2.02901e-28	0	0	4.86959e-06	[0 +]	OxoC6c0CoAKAT	1.01056e-28	-3.95159e-31	2.65272e-28	2.0659e-13	0	OxoC6c0CoAKAT	-1.28107e-31	-9.21215e-30	-1.41086e-13	-3.71626e-14	0	OxoC6c0CoAKAT	-3.45406e-30	-2.69359e-14	6.97873e-23	7.56835e-06	[0 +]	OxoC6c0CoAKAT	0	0	0	1.96301e-13	0
OxoC8c0CoAKAT	5.41579e-24	-3.39461e-33	0	-4.54333e-14	0	OxoC8c0CoAKAT	1.8198e-27	0	0	4.86959e-06	[0 +]	OxoC8c0CoAKAT	-1.49057e-27	-3.95159e-31	-2.81768e-14	2.0659e-13	0	OxoC8c0CoAKAT	-1.28107e-31	-9.21215e-30	-1.21911e-25	1.4828e-13	0	OxoC8c0CoAKAT	-7.69762e-30	-2.69359e-14	-1.82494e-21	7.56835e-06	[0 +]	OxoC8c0CoAKAT	0	0	0	1.96301e-13	0
OxoC8c1d5cisCoAKAT	-6.79147e-24	0	-1.01813e-14	7.19721e-14	0	OxoC8c1d5cisCoAKAT	-1.61557e-27	0	0	3.45584e-06	[0 +]	OxoC8c1d5cisCoAKAT	1.58469e-27	0	1.58469e-27	-1.59753e-13	0	OxoC8c1d5cisCoAKAT	0	0	-1.59084e-13	2.15589e-13	0	OxoC8c1d5cisCoAKAT	4.19678e-30	0	0	5.95451e-06	[0 +]	OxoC8c1d5cisCoAKAT	0	0	0	1.50925e-13	0
PalmitateKETOACYLCOATHIOLRXN	0	0	0	0	0	PalmitateKETOACYLCOATHIOLRXN	1.84165e-27	0	0	4.86959e-06	[0 +]	PalmitateKETOACYLCOATHIOLRXN	-1.48274e-27	0	0	2.0659e-13	0	PalmitateKETOACYLCOATHIOLRXN	3.18756e-47	0	0	0	0	PalmitateKETOACYLCOATHIOLRXN	-5.67804e-30	-2.42423e-13	0	7.56835e-06	[0 +]	PalmitateKETOACYLCOATHIOLRXN	0	0	0	1.96301e-13	0
PalmitoylCoASynthesis	-1.79931e-23	0	0	0	0	PalmitoylCoASynthesis	0.241009	0.241009	0.241008	8.16429	[+ +]	PalmitoylCoASynthesis	0.241009	0.241009	0.241009	0.241009	+	PalmitoylCoASynthesis	0	0	0	1.50638e-11	0	PalmitoylCoASynthesis	0.244311	0.244311	0.244311	3.21919	[+ +]	PalmitoylCoASynthesis	0.244311	0.244311	0.244311	0.244311	+
PalmitoylLinolenoylDiacylglycerolSink	0	0	0	0	0	PalmitoylLinolenoylDiacylglycerolSink	0	4.89098e-17	0	4.95977e-07	0	PalmitoylLinolenoylDiacylglycerolSink	0	0	0	3.07309e-14	0	PalmitoylLinolenoylDiacylglycerolSink	0	0	0	3.42459e-14	0	PalmitoylLinolenoylDiacylglycerolSink	0	0	0	9.37284e-07	0	PalmitoylLinolenoylDiacylglycerolSink	0	0	0	2.12057e-14	0
PalmitoylLinolenoylPhosphatidylCholineSink	0	0	0	0	0	PalmitoylLinolenoylPhosphatidylCholineSink	0	6.69041e-16	0	4.25123e-07	0	PalmitoylLinolenoylPhosphatidylCholineSink	0	0	0	0	0	PalmitoylLinolenoylPhosphatidylCholineSink	0	0	0	2.37922e-14	0	PalmitoylLinolenoylPhosphatidylCholineSink	0	0	0	8.10624e-07	0	PalmitoylLinolenoylPhosphatidylCholineSink	0	0	0	2.74115e-14	0
PalmitoylLinoleoylDiacylglycerolSink	0	0	0	0	0	PalmitoylLinoleoylDiacylglycerolSink	0	0	0	0	0	PalmitoylLinoleoylDiacylglycerolSink	0	0	0	0	0	PalmitoylLinoleoylDiacylglycerolSink	0	0	0	0	0	PalmitoylLinoleoylDiacylglycerolSink	0	0	0	0	0	PalmitoylLinoleoylDiacylglycerolSink	0	0	0	0	0
PalmitoylLinoleoylPhosphatidylCholineSink	0	0	0	0	0	PalmitoylLinoleoylPhosphatidylCholineSink	0	0	0	4.28524e-07	0	PalmitoylLinoleoylPhosphatidylCholineSink	0	0	0	0	0	PalmitoylLinoleoylPhosphatidylCholineSink	0	0	0	1.6266e-14	0	PalmitoylLinoleoylPhosphatidylCholineSink	0	0	0	8.14702e-07	0	PalmitoylLinoleoylPhosphatidylCholineSink	0	0	0	1.97298e-14	0
PalmitoylOleoylDiacylglycerolSink	0	0	0	0	0	PalmitoylOleoylDiacylglycerolSink	0	0	0	0	0	PalmitoylOleoylDiacylglycerolSink	0	0	0	0	0	PalmitoylOleoylDiacylglycerolSink	0	0	0	0	0	PalmitoylOleoylDiacylglycerolSink	0	0	0	0	0	PalmitoylOleoylDiacylglycerolSink	0	0	0	0	0
PalmitoylOleoylPhosphatidylCholineSink	0	0	0	0	0	PalmitoylOleoylPhosphatidylCholineSink	0	0	0	4.3198e-07	0	PalmitoylOleoylPhosphatidylCholineSink	0	2.23438e-17	0	0	0	PalmitoylOleoylPhosphatidylCholineSink	0	0	0	3.68636e-14	0	PalmitoylOleoylPhosphatidylCholineSink	-9.68552e-17	-1.17258e-16	0	8.18821e-07	0	PalmitoylOleoylPhosphatidylCholineSink	0	8.33493e-17	0	1.95524e-14	0
PalmitoylPalmitoylDiacylglycerolSink	0	0	0	0	0	PalmitoylPalmitoylDiacylglycerolSink	0	0	0	0	0	PalmitoylPalmitoylDiacylglycerolSink	0	0	0	0	0	PalmitoylPalmitoylDiacylglycerolSink	0	0	0	0	0	PalmitoylPalmitoylDiacylglycerolSink	0	0	0	0	0	PalmitoylPalmitoylDiacylglycerolSink	0	0	0	0	0
PalmitoylPalmitoylPhosphatidylCholineSink	0	0	0	0	0	PalmitoylPalmitoylPhosphatidylCholineSink	0	0	0	0	0	PalmitoylPalmitoylPhosphatidylCholineSink	0	0	0	0	0	PalmitoylPalmitoylPhosphatidylCholineSink	0	0	0	0	0	PalmitoylPalmitoylPhosphatidylCholineSink	0	0	0	0	0	PalmitoylPalmitoylPhosphatidylCholineSink	0	0	0	0	0
PAP1	-5.38061e-24	0	0	0	0	PAP1	0.180756	0	4.03861e-16	2.76303	[0 +]	PAP1	0.241009	2.23438e-17	0	0.241009	[0 +]	PAP1	0	0	0	0	0	PAP1	0.122156	-8.42784e-17	0	1.35604	[0 +]	PAP1	0.213772	8.33493e-17	1.05882e-16	0.244311	[0 +]
PAP2	1.23438e-23	0	0	0	0	PAP2	0.421765	0.602521	0	2.86632	[0 +]	PAP2	0.361513	0.602521	0.361513	0.602521	[+ +]	PAP2	0	0	0	2.62725e-12	0	PAP2	0.488622	0.610778	0	1.46074	[0 +]	PAP2	0.397005	0.610778	0.366467	0.610778	[+ +]
PC34c1FFAsink	0	0	0	0	0	PC34c1FFAsink	0	-3.34521e-17	0	4.3198e-07	0	PC34c1FFAsink	0	2.23438e-17	0	0	0	PC34c1FFAsink	0	0	0	3.68636e-14	0	PC34c1FFAsink	-9.68552e-17	-1.17258e-16	0	8.18821e-07	0	PC34c1FFAsink	0	8.33493e-17	0	1.95524e-14	0
PC34c2FFAsink	-1.78816e-26	0	0	0	0	PC34c2FFAsink	0	-2.67622e-16	0	4.28524e-07	0	PC34c2FFAsink	1.02672e-28	0	0	0	0	PC34c2FFAsink	0	0	0	1.6266e-14	0	PC34c2FFAsink	0	0	0	8.14702e-07	0	PC34c2FFAsink	0	0	0	1.97298e-14	0
PC34c3FFAsink	0	0	0	0	0	PC34c3FFAsink	0	0	0	4.25123e-07	0	PC34c3FFAsink	0	0	0	0	0	PC34c3FFAsink	0	0	0	2.37922e-14	0	PC34c3FFAsink	0	0	0	8.10624e-07	0	PC34c3FFAsink	0	0	0	2.74115e-14	0
PC36c3FFAsink	0	0	0	0	0	PC36c3FFAsink	0	0	0	4.05799e-07	0	PC36c3FFAsink	0	0	0	5.95038e-15	0	PC36c3FFAsink	0	0	0	4.25433e-14	0	PC36c3FFAsink	0	0	0	7.73461e-07	0	PC36c3FFAsink	0	0	0	2.49893e-14	0
PC36c4FFAsink	0	0	0	0	0	PC36c4FFAsink	0	-3.34521e-17	0	4.02748e-07	0	PC36c4FFAsink	0	0	0	6.4284e-15	0	PC36c4FFAsink	0	0	0	2.40569e-14	0	PC36c4FFAsink	0	0	0	7.69785e-07	0	PC36c4FFAsink	0	0	0	2.27201e-14	0
PC36c5FFAsink	0	0	0	0	0	PC36c5FFAsink	0	0	0	3.99743e-07	0	PC36c5FFAsink	0	0	0	5.39805e-15	0	PC36c5FFAsink	0	0	0	2.94031e-14	0	PC36c5FFAsink	0	0	0	7.66144e-07	0	PC36c5FFAsink	0	0	0	1.59657e-14	0
PC36c6FFAsink	0	0	0	0	0	PC36c6FFAsink	0	-2.34166e-16	0	3.96782e-07	0	PC36c6FFAsink	0	0	0	5.25051e-15	0	PC36c6FFAsink	0	0	0	3.88512e-14	0	PC36c6FFAsink	0	0	0	7.62537e-07	0	PC36c6FFAsink	0	0	0	0	0
PCsink	0	0	0	0	0	PCsink	0	1.28184e-12	0	3.89024e-05	[0 +]	PCsink	0	0	0	0	0	PCsink	0	0	0	0	0	PCsink	0	0	0	7.10183e-05	[0 +]	PCsink	0	0	0	9.97727e-15	0
PDAT16c0c16c0c16c0c16c0	0	0	0	0	0	PDAT16c0c16c0c16c0c16c0	0	0	0	2.34413	[0 +]	PDAT16c0c16c0c16c0c16c0	0	0	0	0.0803362	[0 +]	PDAT16c0c16c0c16c0c16c0	0	0	0	2.19989e-12	0	PDAT16c0c16c0c16c0c16c0	6.60498e-31	0	0	0.931401	[0 +]	PDAT16c0c16c0c16c0c16c0	0	0	0	0.081437	[0 +]
PDAT16c0c16c0c18c1c18c1	0	0	0	0	0	PDAT16c0c16c0c18c1c18c1	0	0	0	2.3843	[0 +]	PDAT16c0c16c0c18c1c18c1	0	0	0	0.120504	[0 +]	PDAT16c0c16c0c18c1c18c1	0	0	0	2.90079e-12	0	PDAT16c0c16c0c18c1c18c1	0	0	0	0.97212	[0 +]	PDAT16c0c16c0c18c1c18c1	0	0	0	0.122156	[0 +]
PDAT16c0c16c0c18c2c18c2	0	0	0	0	0	PDAT16c0c16c0c18c2c18c2	0	0	0	2.3843	[0 +]	PDAT16c0c16c0c18c2c18c2	0	0	0	0.120504	[0 +]	PDAT16c0c16c0c18c2c18c2	0	0	0	3.02894e-12	0	PDAT16c0c16c0c18c2c18c2	0	0	0	0.97212	[0 +]	PDAT16c0c16c0c18c2c18c2	0	0	0	0.122156	[0 +]
PDAT16c0c16c0c18c3c18c3	0	0	0	0	0	PDAT16c0c16c0c18c3c18c3	0	0	0	2.3843	[0 +]	PDAT16c0c16c0c18c3c18c3	0	0	0	0.120504	[0 +]	PDAT16c0c16c0c18c3c18c3	0	0	0	1.60784e-12	0	PDAT16c0c16c0c18c3c18c3	0	0	0	0.97212	[0 +]	PDAT16c0c16c0c18c3c18c3	0.0305389	0	0	0.122156	[0 +]
PDAT16c0c18c1c16c0c16c0	0	0	0	0	0	PDAT16c0c18c1c16c0c16c0	0	0	0	2.3843	[0 +]	PDAT16c0c18c1c16c0c16c0	0	0	0	0.120504	[0 +]	PDAT16c0c18c1c16c0c16c0	0	0	0	2.90079e-12	0	PDAT16c0c18c1c16c0c16c0	0	0	0	0.97212	[0 +]	PDAT16c0c18c1c16c0c16c0	0	0	0	0.122156	[0 +]
PDAT16c0c18c1c18c1c18c1	0	0	0	0	0	PDAT16c0c18c1c18c1c18c1	0	0	0	2.32405	[0 +]	PDAT16c0c18c1c18c1c18c1	0	0	0	0.0602521	[0 +]	PDAT16c0c18c1c18c1c18c1	0	0	0	3.64778e-12	0	PDAT16c0c18c1c18c1c18c1	0	0	0	0.911042	[0 +]	PDAT16c0c18c1c18c1c18c1	0	0	0	0.0610778	[0 +]
PDAT16c0c18c1c18c2c18c2	0	0	0	0	0	PDAT16c0c18c1c18c2c18c2	0	0	0	2.3843	[0 +]	PDAT16c0c18c1c18c2c18c2	0	0	0	0.120504	[0 +]	PDAT16c0c18c1c18c2c18c2	0	0	0	0	0	PDAT16c0c18c1c18c2c18c2	0	0	0	0.97212	[0 +]	PDAT16c0c18c1c18c2c18c2	0	0	0	0.122156	[0 +]
PDAT16c0c18c1c18c3c18c3	0	0	0	0	0	PDAT16c0c18c1c18c3c18c3	0	0	0	2.3843	[0 +]	PDAT16c0c18c1c18c3c18c3	0	0	0	0.120504	[0 +]	PDAT16c0c18c1c18c3c18c3	0	0	0	1.75547e-12	0	PDAT16c0c18c1c18c3c18c3	0	0	0	0.97212	[0 +]	PDAT16c0c18c1c18c3c18c3	0	0	0	0.122156	[0 +]
PDAT16c0c18c2c16c0c16c0	0	0	0	0	0	PDAT16c0c18c2c16c0c16c0	0	0	0	2.3843	[0 +]	PDAT16c0c18c2c16c0c16c0	0	0	0	0.120504	[0 +]	PDAT16c0c18c2c16c0c16c0	0	0	0	3.04421e-12	0	PDAT16c0c18c2c16c0c16c0	0	0	0	0.97212	[0 +]	PDAT16c0c18c2c16c0c16c0	0	0	0	0.122156	[0 +]
PDAT16c0c18c2c18c2c18c2	0	0	0	0	0	PDAT16c0c18c2c18c2c18c2	0	0	0	2.44455	[0 +]	PDAT16c0c18c2c18c2c18c2	0	0	0	0.180756	[0 +]	PDAT16c0c18c2c18c2c18c2	0	0	0	1.98436e-12	0	PDAT16c0c18c2c18c2c18c2	0	0	0	1.0332	[0 +]	PDAT16c0c18c2c18c2c18c2	0	0	0	0.183233	[0 +]
PDAT16c0c18c2c18c3c18c3	0	0	0	0	0	PDAT16c0c18c2c18c3c18c3	0	0	0	2.5048	[0 +]	PDAT16c0c18c2c18c3c18c3	0	0	0	0.241009	[0 +]	PDAT16c0c18c2c18c3c18c3	0	0	0	1.64139e-12	0	PDAT16c0c18c2c18c3c18c3	0	0	0	1.09428	[0 +]	PDAT16c0c18c2c18c3c18c3	0	0	0	0.244311	[0 +]
PDAT16c0c18c3c16c0c16c0	0	0	0	0	0	PDAT16c0c18c3c16c0c16c0	0	0	0	2.3843	[0 +]	PDAT16c0c18c3c16c0c16c0	0	0	0	0.120504	[0 +]	PDAT16c0c18c3c16c0c16c0	0	0	0	1.5801e-12	0	PDAT16c0c18c3c16c0c16c0	0	0	0	0.97212	[0 +]	PDAT16c0c18c3c16c0c16c0	0	0	0	0.122156	[0 +]
PDAT16c0c18c3c18c3c18c3	0	0	0	0	0	PDAT16c0c18c3c18c3c18c3	0	0	0	2.5048	[0 +]	PDAT16c0c18c3c18c3c18c3	0	0	0	0.241009	[0 +]	PDAT16c0c18c3c18c3c18c3	0	0	0	1.66408e-12	0	PDAT16c0c18c3c18c3c18c3	0	0	0	1.09428	[0 +]	PDAT16c0c18c3c18c3c18c3	0	0	0	0.244311	[0 +]
PDAT18c1c18c1c16c0c16c0	0	0	0	0	0	PDAT18c1c18c1c16c0c16c0	0	0	0	2.32405	[0 +]	PDAT18c1c18c1c16c0c16c0	0	0	0	0.0602521	[0 +]	PDAT18c1c18c1c16c0c16c0	0	0	0	1.14631e-12	0	PDAT18c1c18c1c16c0c16c0	0	0	0	0.911042	[0 +]	PDAT18c1c18c1c16c0c16c0	0	0	0	0.0610778	[0 +]
PDAT18c1c18c1c18c1c18c1	0	0	0	0	0	PDAT18c1c18c1c18c1c18c1	0	0	0	2.30396	[0 +]	PDAT18c1c18c1c18c1c18c1	0	0	0	0.0401681	[0 +]	PDAT18c1c18c1c18c1c18c1	0	0	0	6.76162e-13	0	PDAT18c1c18c1c18c1c18c1	0	0	0	0.890683	[0 +]	PDAT18c1c18c1c18c1c18c1	0	0	0	0.0407185	[0 +]
PDAT18c1c18c1c18c2c18c2	0	0	0	0	0	PDAT18c1c18c1c18c2c18c2	0	0	0	2.32405	[0 +]	PDAT18c1c18c1c18c2c18c2	0	0	0	0.0602521	[0 +]	PDAT18c1c18c1c18c2c18c2	0	0	0	3.89432e-12	0	PDAT18c1c18c1c18c2c18c2	0	0	0	0.911042	[0 +]	PDAT18c1c18c1c18c2c18c2	0	0	0	0.0610778	[0 +]
PDAT18c1c18c1c18c3c18c3	0	0	0	0	0	PDAT18c1c18c1c18c3c18c3	0	0	0	2.32405	[0 +]	PDAT18c1c18c1c18c3c18c3	0.0602521	0	0	0.0602521	[0 +]	PDAT18c1c18c1c18c3c18c3	0	0	0	2.75744e-13	0	PDAT18c1c18c1c18c3c18c3	0	0	0	0.911042	[0 +]	PDAT18c1c18c1c18c3c18c3	0	0	0	0.0610778	[0 +]
PDAT18c1c18c2c16c0c16c0	0	0	0	0	0	PDAT18c1c18c2c16c0c16c0	0	0	0	2.3843	[0 +]	PDAT18c1c18c2c16c0c16c0	0	0	0	0.120504	[0 +]	PDAT18c1c18c2c16c0c16c0	0	0	0	2.07889e-12	0	PDAT18c1c18c2c16c0c16c0	0	0	0	0.97212	[0 +]	PDAT18c1c18c2c16c0c16c0	0	0	0	0.122156	[0 +]
PDAT18c1c18c2c18c1c18c1	0	0	0	0	0	PDAT18c1c18c2c18c1c18c1	0	0	0	2.32405	[0 +]	PDAT18c1c18c2c18c1c18c1	0	0	0	0.0602521	[0 +]	PDAT18c1c18c2c18c1c18c1	0	0	0	3.91649e-12	0	PDAT18c1c18c2c18c1c18c1	0	0	0	0.911042	[0 +]	PDAT18c1c18c2c18c1c18c1	0	0	0	0.0610778	[0 +]
PDAT18c1c18c2c18c2c18c2	0	0	0	0	0	PDAT18c1c18c2c18c2c18c2	0	0	0	2.3843	[0 +]	PDAT18c1c18c2c18c2c18c2	0	0	0	0.120504	[0 +]	PDAT18c1c18c2c18c2c18c2	0	0	0	1.63127e-12	0	PDAT18c1c18c2c18c2c18c2	0	0	0	0.97212	[0 +]	PDAT18c1c18c2c18c2c18c2	0	0	0	0.122156	[0 +]
PDAT18c1c18c2c18c3c18c3	1.10065e-23	0	0	0	0	PDAT18c1c18c2c18c3c18c3	0	0	0	2.3843	[0 +]	PDAT18c1c18c2c18c3c18c3	-2.08215e-25	0	0	0.120504	[0 +]	PDAT18c1c18c2c18c3c18c3	0	0	0	2.08903e-12	0	PDAT18c1c18c2c18c3c18c3	0	0	0	0.97212	[0 +]	PDAT18c1c18c2c18c3c18c3	0	0	0	0.122156	[0 +]
PDAT18c1c18c3c16c0c16c0	0	0	0	0	0	PDAT18c1c18c3c16c0c16c0	0	0	0	2.3843	[0 +]	PDAT18c1c18c3c16c0c16c0	0	0	0	0.120504	[0 +]	PDAT18c1c18c3c16c0c16c0	0	0	0	1.68715e-12	0	PDAT18c1c18c3c16c0c16c0	0	0	0	0.97212	[0 +]	PDAT18c1c18c3c16c0c16c0	0	0	0	0.122156	[0 +]
PDAT18c1c18c3c18c1c18c1	0	0	0	0	0	PDAT18c1c18c3c18c1c18c1	0	0	0	2.32405	[0 +]	PDAT18c1c18c3c18c1c18c1	0	0	0	0.0602521	[0 +]	PDAT18c1c18c3c18c1c18c1	0	0	0	2.75744e-13	0	PDAT18c1c18c3c18c1c18c1	0	0	0	0.911042	[0 +]	PDAT18c1c18c3c18c1c18c1	0	0	0	0.0610778	[0 +]
PDAT18c1c18c3c18c3c18c3	0	0	0	0	0	PDAT18c1c18c3c18c3c18c3	0	0	0	2.3843	[0 +]	PDAT18c1c18c3c18c3c18c3	0	0	0	0.120504	[0 +]	PDAT18c1c18c3c18c3c18c3	0	0	0	1.0017e-12	0	PDAT18c1c18c3c18c3c18c3	0	0	0	0.97212	[0 +]	PDAT18c1c18c3c18c3c18c3	0.122156	0	0	0.122156	[0 +]
PDAT18c2c18c2c16c0c16c0	0	0	0	0	0	PDAT18c2c18c2c16c0c16c0	0	0	0	2.1691	[0 +]	PDAT18c2c18c2c16c0c16c0	0	0	0	0.180756	[0 +]	PDAT18c2c18c2c16c0c16c0	0	0	0	1.13324e-12	0	PDAT18c2c18c2c16c0c16c0	0	0	0	1.0332	[0 +]	PDAT18c2c18c2c16c0c16c0	0	0	0	0.183233	[0 +]
PDAT18c2c18c2c18c1c18c1	0	0	0	0	0	PDAT18c2c18c2c18c1c18c1	0	0	0	2.12224	[0 +]	PDAT18c2c18c2c18c1c18c1	0	0	0	0.120504	[0 +]	PDAT18c2c18c2c18c1c18c1	0	0	0	2.79502e-12	0	PDAT18c2c18c2c18c1c18c1	0	0	0	0.97212	[0 +]	PDAT18c2c18c2c18c1c18c1	0	0	0	0.122156	[0 +]
PDAT18c2c18c2c18c2c18c2	0	0	0	0	0	PDAT18c2c18c2c18c2c18c2	0	0	0	2.14902	[0 +]	PDAT18c2c18c2c18c2c18c2	0	0	0	0.120504	[0 +]	PDAT18c2c18c2c18c2c18c2	0	0	0	1.85061e-12	0	PDAT18c2c18c2c18c2c18c2	0	0	0	0.97212	[0 +]	PDAT18c2c18c2c18c2c18c2	0	0	0	0.122156	[0 +]
PDAT18c2c18c2c18c3c18c3	0	0	0	0	0	PDAT18c2c18c2c18c3c18c3	0	-7.02899e-33	0	2.20927	[0 +]	PDAT18c2c18c2c18c3c18c3	0.180756	0	0	0.180756	[0 +]	PDAT18c2c18c2c18c3c18c3	0	0	0	9.30477e-13	0	PDAT18c2c18c2c18c3c18c3	0	0	0	1.0332	[0 +]	PDAT18c2c18c2c18c3c18c3	0	0	0	0.183233	[0 +]
PDAT18c2c18c3c16c0c16c0	0	0	0	0	0	PDAT18c2c18c3c16c0c16c0	0	0	0	2.21597	[0 +]	PDAT18c2c18c3c16c0c16c0	0	0	0	0.241009	[0 +]	PDAT18c2c18c3c16c0c16c0	0	0	0	2.31279e-13	0	PDAT18c2c18c3c16c0c16c0	0	0	0	1.09428	[0 +]	PDAT18c2c18c3c16c0c16c0	0	0	0	0.244311	[0 +]
PDAT18c2c18c3c18c1c18c1	0	0	0	0	0	PDAT18c2c18c3c18c1c18c1	0	0	0	2.12224	[0 +]	PDAT18c2c18c3c18c1c18c1	0	0	0	0.120504	[0 +]	PDAT18c2c18c3c18c1c18c1	0	0	0	1.81787e-12	0	PDAT18c2c18c3c18c1c18c1	0	0	0	0.97212	[0 +]	PDAT18c2c18c3c18c1c18c1	0	0	0	0.122156	[0 +]
PDAT18c2c18c3c18c2c18c2	0	0	0	0	0	PDAT18c2c18c3c18c2c18c2	0	0	0	2.20927	[0 +]	PDAT18c2c18c3c18c2c18c2	0	-3.47943e-33	0	0.180756	[0 +]	PDAT18c2c18c3c18c2c18c2	0	0	0	2.37738e-12	0	PDAT18c2c18c3c18c2c18c2	0	0	0	1.0332	[0 +]	PDAT18c2c18c3c18c2c18c2	0	0	0	0.183233	[0 +]
PDAT18c2c18c3c18c3c18c3	0	0	0	0	0	PDAT18c2c18c3c18c3c18c3	0	0	0	2.36325	[0 +]	PDAT18c2c18c3c18c3c18c3	0	0	0	0.361513	[0 +]	PDAT18c2c18c3c18c3c18c3	0	0	0	2.96336e-12	0	PDAT18c2c18c3c18c3c18c3	0	0	0	1.21643	[0 +]	PDAT18c2c18c3c18c3c18c3	0	0	0	0.366467	[0 +]
PDAT18c3c18c3c16c0c16c0	0	0	0	0	0	PDAT18c3c18c3c16c0c16c0	0.0602521	0	0	2.18919	[0 +]	PDAT18c3c18c3c16c0c16c0	0	0	0	0.241009	[0 +]	PDAT18c3c18c3c16c0c16c0	0	0	0	1.65743e-12	0	PDAT18c3c18c3c16c0c16c0	0	0	0	1.09428	[0 +]	PDAT18c3c18c3c16c0c16c0	0	0	0	0.244311	[0 +]
PDAT18c3c18c3c18c1c18c1	0	0	0	0	0	PDAT18c3c18c3c18c1c18c1	0.120504	0	0	2.09546	[0 +]	PDAT18c3c18c3c18c1c18c1	0	0	0	0.120504	[0 +]	PDAT18c3c18c3c18c1c18c1	0	0	0	1.99512e-12	0	PDAT18c3c18c3c18c1c18c1	0.122156	0	0	0.97212	[0 +]	PDAT18c3c18c3c18c1c18c1	0	0	0	0.122156	[0 +]
PDAT18c3c18c3c18c2c18c2	0	0	0	0	0	PDAT18c3c18c3c18c2c18c2	0	0	0	2.28291	[0 +]	PDAT18c3c18c3c18c2c18c2	0	0	0	0.361513	[0 +]	PDAT18c3c18c3c18c2c18c2	0	0	0	3.40755e-12	0	PDAT18c3c18c3c18c2c18c2	0	0	0	1.19042	[0 +]	PDAT18c3c18c3c18c2c18c2	0	0	0	0.366467	[0 +]
PDAT18c3c18c3c18c3c18c3	0	0	0	0	0	PDAT18c3c18c3c18c3c18c3	0	0	0	2.28291	[0 +]	PDAT18c3c18c3c18c3c18c3	0	0	0	0.361513	[0 +]	PDAT18c3c18c3c18c3c18c3	0	0	0	2.2385e-12	0	PDAT18c3c18c3c18c3c18c3	0	0	0	1.19042	[0 +]	PDAT18c3c18c3c18c3c18c3	0	0	0	0.366467	[0 +]
PEPCARBOXRXN	1.25792e-13	0	0	0	0	PEPCARBOXRXN	7.32063	1.80756	8.69145e-24	15.8466	[0 +]	PEPCARBOXRXN	0	-1.51773e-17	0	3.02855e-13	0	PEPCARBOXRXN	0	0	0	1.98205e-11	0	PEPCARBOXRXN	5.94897	0	0	16.0642	[0 +]	PEPCARBOXRXN	10.1145	-1.61708e-28	0	10.1145	[0 +]
PEPCARBOXYKINRXN	0	0	0	0	0	PEPCARBOXYKINRXN	0	0	0	15.8466	[0 +]	PEPCARBOXYKINRXN	0	0	0	0	0	PEPCARBOXYKINRXN	0	-6.8494e-15	0	2.34055e-11	0	PEPCARBOXYKINRXN	0	0	0	5.94975	[0 +]	PEPCARBOXYKINRXN	0	0	0	5.69649e-12	0
PEPDEPHOSRXN	0	1.00417e-11	0	0	0	PEPDEPHOSRXN	0	3.61513	0	31.8736	[0 +]	PEPDEPHOSRXN	0	16.0271	0	16.0271	[0 +]	PEPDEPHOSRXN	0	0	0	1.37532e-11	0	PEPDEPHOSRXN	0	6.4376	0	22.1964	[0 +]	PEPDEPHOSRXN	6.13221	7.78131	0	16.2467	[0 +]
PEPDEPHOSRXNchloroplast	0	0	0	0	0	PEPDEPHOSRXNchloroplast	0.180756	6.98925	0	31.8736	[0 +]	PEPDEPHOSRXNchloroplast	16.0271	0	0	16.0271	[0 +]	PEPDEPHOSRXNchloroplast	0	0	0	1.97594e-11	0	PEPDEPHOSRXNchloroplast	10.2977	3.86011	0	22.1964	[0 +]	PEPDEPHOSRXNchloroplast	0	8.46538	0	16.2467	[0 +]
PeroxisomeATPexchange	-1.37371e-24	-3.39461e-33	-6.96544e-14	-7.00943e-14	0	PeroxisomeATPexchange	2.0637e-28	0	0	4.86959e-06	[0 +]	PeroxisomeATPexchange	1.00925e-28	-5.54028e-31	2.5372e-28	2.0659e-13	0	PeroxisomeATPexchange	3.18756e-47	-9.27073e-30	-1.41086e-13	-3.71626e-14	0	PeroxisomeATPexchange	-4.59423e-30	-2.69359e-14	6.97874e-23	7.56835e-06	[0 +]	PeroxisomeATPexchange	0	0	0	1.96301e-13	0
peroxisomeglutamateexchange	0	0	0	7.86341e-13	0	peroxisomeglutamateexchange	0	0	0	2.85683e-05	[0 +]	peroxisomeglutamateexchange	0	0	0	8.62317e-13	0	peroxisomeglutamateexchange	10	10	10	10	+	peroxisomeglutamateexchange	10.1145	14.2311	4.16472	16.0642	[+ +]	peroxisomeglutamateexchange	10.1145	10.1145	10.1145	10.1145	+
peroxisomeglycerateexchange	-2.34997e-27	-5.12637e-32	1.07411e-12	1.38735e-27	0	peroxisomeglycerateexchange	0	0	-2.85683e-05	0	[- 0]	peroxisomeglycerateexchange	0	0	-5.95506e-13	0	0	peroxisomeglycerateexchange	-10	-10	-10	-10	-	peroxisomeglycerateexchange	-10.1145	-5.99784	-16.0642	-4.16472	[- -]	peroxisomeglycerateexchange	-10.1145	-10.1145	-10.1145	-10.1145	-
peroxisomeglycineexchange	-2.34997e-27	-5.12637e-32	9.63215e-13	1.39435e-27	0	peroxisomeglycineexchange	0	0	-2.85683e-05	0	[- 0]	peroxisomeglycineexchange	0	0	-6.82239e-13	0	0	peroxisomeglycineexchange	-20	-20	-20	-20	-	peroxisomeglycineexchange	-20.229	-20.229	-20.229	-20.2289	[- -]	peroxisomeglycineexchange	-20.229	-20.229	-20.229	-20.229	-
peroxisomeglycolateexchange	0	0	0	0	0	peroxisomeglycolateexchange	0	0	0	0	0	peroxisomeglycolateexchange	0	0	0	0	0	peroxisomeglycolateexchange	20	20	20	20	+	peroxisomeglycolateexchange	20.229	20.229	20.2289	20.229	[+ +]	peroxisomeglycolateexchange	20.229	20.229	20.229	20.229	+
PeroxisomeLinoleicAcidExchange	5.41864e-24	0	0	0	0	PeroxisomeLinoleicAcidExchange	0	0	0	3.69417e-06	[0 +]	PeroxisomeLinoleicAcidExchange	0	0	0	3.64589e-14	0	PeroxisomeLinoleicAcidExchange	0	-9.26942e-30	0	6.77316e-14	0	PeroxisomeLinoleicAcidExchange	0	0	0	6.18178e-06	[0 +]	PeroxisomeLinoleicAcidExchange	0	0	0	1.00771e-13	0
PeroxisomeLinolenicAcidExchange	-6.79377e-24	0	0	0	0	PeroxisomeLinolenicAcidExchange	0	0	0	3.45584e-06	[0 +]	PeroxisomeLinolenicAcidExchange	0	0	0	0	0	PeroxisomeLinolenicAcidExchange	0	0	0	2.15589e-13	0	PeroxisomeLinolenicAcidExchange	0	0	0	5.95451e-06	[0 +]	PeroxisomeLinolenicAcidExchange	0	0	0	1.50925e-13	0
PeroxisomeMalateExchange	1.71992e-23	1.19328e-31	-8.74083e-13	-1.34264e-13	0	PeroxisomeMalateExchange	2.27453e-28	0	-5.35655e-05	3.57103e-06	[- +]	PeroxisomeMalateExchange	-2.26779e-27	1.26382e-30	-6.04945e-13	7.44383e-14	0	PeroxisomeMalateExchange	10	10	10	10	+	PeroxisomeMalateExchange	10.1145	5.99784	4.16472	16.0642	[+ +]	PeroxisomeMalateExchange	10.1145	10.1145	10.1145	10.1145	+
peroxisomeO2exchange	-7.32428e-25	-1.35784e-32	-1.85379e-14	5.52976e-13	0	peroxisomeO2exchange	2.33808e-27	0	0	1.7141e-05	[0 +]	peroxisomeO2exchange	-1.263e-27	-1.54779e-30	-1.99058e-30	1.93582e-13	0	peroxisomeO2exchange	10	10	10	10	+	peroxisomeO2exchange	10.1145	10.1145	10.1145	10.1145	[+ +]	peroxisomeO2exchange	10.1145	10.1145	10.1145	10.1145	+
PeroxisomeOleateExchange	0	0	0	0	0	PeroxisomeOleateExchange	0	0	0	3.96782e-06	[0 +]	PeroxisomeOleateExchange	0	0	0	2.02426e-13	0	PeroxisomeOleateExchange	0	0	0	2.75018e-13	0	PeroxisomeOleateExchange	0	2.15487e-13	0	6.42709e-06	[0 +]	PeroxisomeOleateExchange	0	0	0	5.61836e-14	0
PeroxisomeOxalaceticAcidExchange	-1.71964e-23	-6.80645e-32	3.36946e-13	-1.89348e-12	0	PeroxisomeOxalaceticAcidExchange	-2.27403e-28	0	0	5.35655e-05	[0 +]	PeroxisomeOxalaceticAcidExchange	3.45128e-27	-5.71871e-31	3.45128e-27	2.0844e-12	0	PeroxisomeOxalaceticAcidExchange	-10	-10	-10	-10	-	PeroxisomeOxalaceticAcidExchange	-10.1145	-5.99784	-16.0642	-4.16472	[- -]	PeroxisomeOxalaceticAcidExchange	-10.1145	-10.1145	-10.1145	-10.1145	-
peroxisomeoxoglutarateexchange	0	0	-7.86341e-13	0	0	peroxisomeoxoglutarateexchange	0	0	-2.85683e-05	0	[- 0]	peroxisomeoxoglutarateexchange	0	0	-8.62317e-13	0	0	peroxisomeoxoglutarateexchange	-10	-10	-10	-10	-	peroxisomeoxoglutarateexchange	-10.1145	-14.2311	-16.0642	-4.16472	[- -]	peroxisomeoxoglutarateexchange	-10.1145	-10.1145	-10.1145	-10.1145	-
PeroxisomePalmitateExchange	0	0	0	0	0	PeroxisomePalmitateExchange	9.09003e-29	0	0	4.86959e-06	[0 +]	PeroxisomePalmitateExchange	-1.48154e-27	0	0	2.0659e-13	0	PeroxisomePalmitateExchange	3.18756e-47	0	0	0	0	PeroxisomePalmitateExchange	-5.76606e-30	-2.42423e-13	0	7.56835e-06	[0 +]	PeroxisomePalmitateExchange	0	0	0	1.96301e-13	0
PeroxisomePPiexchange	1.37364e-24	3.39461e-33	7.00943e-14	6.96544e-14	0	PeroxisomePPiexchange	-2.0638e-28	0	-4.86959e-06	0	[- 0]	PeroxisomePPiexchange	-9.86797e-29	4.10906e-31	-2.0659e-13	-2.53123e-28	0	PeroxisomePPiexchange	-3.18756e-47	9.26826e-30	3.71626e-14	1.41086e-13	0	PeroxisomePPiexchange	2.3064e-30	2.69359e-14	-7.56835e-06	-6.97848e-23	[- 0]	PeroxisomePPiexchange	0	0	-1.96301e-13	0	0
peroxisomeprotonexchange	-1.2471e-26	-1.0008e-47	1.52423e-26	1.52423e-26	0	peroxisomeprotonexchange	-2.70637e-29	0	0	0	0	peroxisomeprotonexchange	-3.55365e-29	2.5458e-30	-3.55365e-29	-3.55365e-29	0	peroxisomeprotonexchange	-8.66039e-29	1.62931e-29	-1.52355e-15	-1.52355e-15	0	peroxisomeprotonexchange	-1.52355e-15	-9.49307e-17	-1.52355e-15	-1.52355e-15	0	peroxisomeprotonexchange	-1.08255e-29	0	-1.08255e-29	-1.08255e-29	0
peroxisomeserineexchange	2.34997e-27	5.12637e-32	-1.39752e-27	-1.07411e-12	0	peroxisomeserineexchange	0	0	0	2.85683e-05	[0 +]	peroxisomeserineexchange	0	0	0	5.95506e-13	0	peroxisomeserineexchange	10	10	10	10	+	peroxisomeserineexchange	10.1145	5.99784	4.16472	16.0642	[+ +]	peroxisomeserineexchange	10.1145	10.1145	10.1145	10.1145	+
PeroxisomeStearicAcidExchange	0	-3.39461e-33	0	0	0	PeroxisomeStearicAcidExchange	0	0	0	4.28524e-06	[0 +]	PeroxisomeStearicAcidExchange	0	-5.23449e-31	0	4.83956e-14	0	PeroxisomeStearicAcidExchange	-1.28107e-31	0	0	5.9654e-14	0	PeroxisomeStearicAcidExchange	0	0	0	6.69268e-06	[0 +]	PeroxisomeStearicAcidExchange	0	0	0	1.89309e-13	0
PeroxisomeSuccinateExchange	-6.18884e-24	0	-6.95095e-14	2.02752e-13	0	PeroxisomeSuccinateExchange	0	0	0	2.85683e-05	[0 +]	PeroxisomeSuccinateExchange	1.18345e-27	0	1.18345e-27	6.82239e-13	0	PeroxisomeSuccinateExchange	0	3.92969e-15	-3.6006e-26	-5.91947e-14	0	PeroxisomeSuccinateExchange	0	0	0	4.40715e-05	[0 +]	PeroxisomeSuccinateExchange	0	0	0	2.42575e-13	0
peroxisomewaterexchange	-2.81177e-23	-2.01954e-32	5.56409e-14	4.71053e-13	0	peroxisomewaterexchange	-4.88801e-27	0	0	5.84351e-05	[0 +]	peroxisomewaterexchange	7.08913e-27	0	7.08913e-27	1.37147e-12	0	peroxisomewaterexchange	-20	-20	-20	-20	-	peroxisomewaterexchange	-20.229	-20.229	-20.229	-20.2289	[- -]	peroxisomewaterexchange	-20.229	-20.229	-20.229	-20.229	-
PGLUCISOMRXN	-1000	-4.16667	-1000	-4.16667	[-1000 -]	PGLUCISOMRXN	-1000	-7.81236e-14	-1000	7.92328	[-1000 +]	PGLUCISOMRXN	-1000	0	-1000	-2.11417e-12	[-1000 0]	PGLUCISOMRXN	-1000	-4.16667	-1000	-4.16667	[-1000 -]	PGLUCISOMRXN	-1000	0	-1000	2.97488	[-1000 +]	PGLUCISOMRXN	-1000	0	-1000	4.13688e-12	[-1000 0]
PGLUCISOMRXNchloroplast	3.43381e-24	0	2.24366e-12	5.96055e-25	0	PGLUCISOMRXNchloroplast	0	0	-5.28219	0	[- 0]	PGLUCISOMRXNchloroplast	1.21558e-25	0	3.03249e-12	1.21558e-25	0	PGLUCISOMRXNchloroplast	0	0	-1.69955e-12	0	0	PGLUCISOMRXNchloroplast	0	0	-0.000134969	0	[- 0]	PGLUCISOMRXNchloroplast	0	0	-2.87488e-12	0	0
PGLYCDEHYDROGRXN	0	1.04162e-32	0	0	0	PGLYCDEHYDROGRXN	0	8.62452e-15	0	7.92328	[0 +]	PGLYCDEHYDROGRXN	0	0	0	6.68851e-12	0	PGLYCDEHYDROGRXN	0	0	0	1.37641e-11	0	PGLYCDEHYDROGRXN	0	0	0	5.94975	[0 +]	PGLYCDEHYDROGRXN	0	1.94761e-29	0	2.36014e-11	0
PGPPHOSPHARXN	0	0	0	0	0	PGPPHOSPHARXN	0	0	0	0	0	PGPPHOSPHARXN	0	0	0	0	0	PGPPHOSPHARXN	0	0	0	0	0	PGPPHOSPHARXN	0	0	0	0	0	PGPPHOSPHARXN	0	0	0	0	0
PhenylalanineAmmoniaLyaseRxn	0	0	0	0	0	PhenylalanineAmmoniaLyaseRxn	0	0	0	1.36435e-07	0	PhenylalanineAmmoniaLyaseRxn	0	0	0	1.03839e-14	0	PhenylalanineAmmoniaLyaseRxn	0	0	0	0	0	PhenylalanineAmmoniaLyaseRxn	0	0	0	2.49573e-07	0	PhenylalanineAmmoniaLyaseRxn	0	0	0	1.29685e-13	0
PHOSGLYPHOSRXN	-900	-1.2931	-900	-1.2931	[- -]	PHOSGLYPHOSRXN	-916.25	-1.69016e-29	-916.25	28.2587	[- +]	PHOSGLYPHOSRXN	-916.25	-3.43437	-916.25	-3.43437	[- -]	PHOSGLYPHOSRXN	-4.39655	0	-850	5.60345	[- +]	PHOSGLYPHOSRXN	-13.7791	0	-864.53	18.5323	[- +]	PHOSGLYPHOSRXN	-864.53	-1.83233	-864.53	6.63304	[- +]
PHOSGLYPHOSRXNchloroplast	1000	101.293	101.293	1000	[+ +1000]	PHOSGLYPHOSRXNchloroplast	1000	83.7505	55.4917	1000	[+ +1000]	PHOSGLYPHOSRXNchloroplast	1000	87.1848	87.1848	1000	[+ +1000]	PHOSGLYPHOSRXNchloroplast	154.397	154.397	154.397	1000	[+ +1000]	PHOSGLYPHOSRXNchloroplast	149.25	146.929	127.053	1000	[+ +1000]	PHOSGLYPHOSRXNchloroplast	1000	147.417	138.952	1000	[+ +1000]
PHOSMANMUTRXN	0	0	0	0	0	PHOSMANMUTRXN	0	0	0	7.92328	[0 +]	PHOSMANMUTRXN	0	0	0	2.28513e-12	0	PHOSMANMUTRXN	0	-1.68508e-28	0	8.53599e-12	0	PHOSMANMUTRXN	0	0	0	2.97488	[0 +]	PHOSMANMUTRXN	0	0	0	5.46047e-12	0
PHOSPHAGLYPSYNRXN	0	0	0	0	0	PHOSPHAGLYPSYNRXN	0	0	0	0	0	PHOSPHAGLYPSYNRXN	0	0	0	0	0	PHOSPHAGLYPSYNRXN	0	0	0	0	0	PHOSPHAGLYPSYNRXN	0	0	0	0	0	PHOSPHAGLYPSYNRXN	0	0	0	0	0
PHOSPHASERDECARBRXN	0	0	0	0	0	PHOSPHASERDECARBRXN	0	1.39192e-15	0	4.3198e-07	0	PHOSPHASERDECARBRXN	0	0	0	0	0	PHOSPHASERDECARBRXN	0	0	0	1.38184e-14	0	PHOSPHASERDECARBRXN	0	0	0	8.18821e-07	0	PHOSPHASERDECARBRXN	0	0	0	1.73394e-14	0
PHOSPHASERSYNRXN	0	0	0	0	0	PHOSPHASERSYNRXN	0	0	0	0	0	PHOSPHASERSYNRXN	0	0	0	0	0	PHOSPHASERSYNRXN	0	0	0	0	0	PHOSPHASERSYNRXN	0	0	0	0	0	PHOSPHASERSYNRXN	0	0	0	0	0
PHOSPHATIDATEPHOSPHATASERXN	0	0	0	0	0	PHOSPHATIDATEPHOSPHATASERXN	0	0	0	15.8466	[0 +]	PHOSPHATIDATEPHOSPHATASERXN	0	0	0	0	0	PHOSPHATIDATEPHOSPHATASERXN	0	0	0	1.83405e-11	0	PHOSPHATIDATEPHOSPHATASERXN	0	0	0	5.94975	[0 +]	PHOSPHATIDATEPHOSPHATASERXN	0	0	0	8.39917e-12	0
PHOSPHOGLUCMUTRXN	-4.16667	-4.16667	-4.16667	-4.16667	-	PHOSPHOGLUCMUTRXN	0	-7.81236e-14	-7.92328	7.92328	[- +]	PHOSPHOGLUCMUTRXN	-2.43715e-26	0	5.78876e-12	4.0928e-12	0	PHOSPHOGLUCMUTRXN	-4.16667	-4.16667	-4.16667	-4.16667	-	PHOSPHOGLUCMUTRXN	0	0	-2.97488	2.97488	[- +]	PHOSPHOGLUCMUTRXN	0	0	2.50475e-12	5.46047e-12	0
PHOSPHOGLUCMUTRXNchloroplast	0	0	0	0	0	PHOSPHOGLUCMUTRXNchloroplast	0	0	0	0	0	PHOSPHOGLUCMUTRXNchloroplast	0	0	0	0	0	PHOSPHOGLUCMUTRXNchloroplast	0	0	0	0	0	PHOSPHOGLUCMUTRXNchloroplast	0	0	0	0	0	PHOSPHOGLUCMUTRXNchloroplast	0	0	0	0	0
PHOSPHOMEVALONATEKINASERXN	-1.74233e-24	0	0	0	0	PHOSPHOMEVALONATEKINASERXN	0	0	0	0	0	PHOSPHOMEVALONATEKINASERXN	0	0	0	0	0	PHOSPHOMEVALONATEKINASERXN	0	0	0	0	0	PHOSPHOMEVALONATEKINASERXN	0	0	0	0	0	PHOSPHOMEVALONATEKINASERXN	0	0	0	0	0
PHOSPHORIBULOKINASERXNchloroplast	50	50	50	50	+	PHOSPHORIBULOKINASERXNchloroplast	49.8888	49.8888	49.8887	55.171	[+ +]	PHOSPHORIBULOKINASERXNchloroplast	49.8888	49.8888	49.8888	49.8888	+	PHOSPHORIBULOKINASERXNchloroplast	80	80	80	80	+	PHOSPHORIBULOKINASERXNchloroplast	80.9158	80.9158	80.9157	80.916	[+ +]	PHOSPHORIBULOKINASERXNchloroplast	80.9158	80.9158	80.9158	80.9158	+
PhotosystemIImodchloroplast	50.431	50.431	50.431	50.431	+	PhotosystemIImodchloroplast	50.431	50.431	50.431	50.431	[+ +]	PhotosystemIImodchloroplast	50.431	50.431	50.431	50.431	+	PhotosystemIImodchloroplast	81.4655	81.4655	81.4655	81.4655	+	PhotosystemIImodchloroplast	81.4655	81.4655	81.4654	81.4655	[+ +]	PhotosystemIImodchloroplast	81.4655	81.4655	81.4655	81.4655	+
PhotosystemImodchloroplast	201.724	201.724	201.724	201.724	+	PhotosystemImodchloroplast	201.724	201.724	201.724	201.724	[+ +]	PhotosystemImodchloroplast	201.724	201.724	201.724	201.724	+	PhotosystemImodchloroplast	325.862	325.862	325.862	325.862	+	PhotosystemImodchloroplast	325.862	325.862	325.862	325.862	[+ +]	PhotosystemImodchloroplast	325.862	325.862	325.862	325.862	+
PLA2c16c0c16c0	0	0	0	0	0	PLA2c16c0c16c0	0	0	0	7.92328	[0 +]	PLA2c16c0c16c0	0	0	0	0	0	PLA2c16c0c16c0	0	0	0	1.15007e-11	0	PLA2c16c0c16c0	0	0	0	2.97488	[0 +]	PLA2c16c0c16c0	0	0	0	4.19959e-12	0
PLA2c16c0c18c1	0	0	0	0	0	PLA2c16c0c18c1	0	0	0	2.22936	[0 +]	PLA2c16c0c18c1	0	0	0	0	0	PLA2c16c0c18c1	0	0	0	3.26498e-12	0	PLA2c16c0c18c1	0	0	0	1.13613	[0 +]	PLA2c16c0c18c1	0	0	0	4.19908e-12	0
PLA2c16c0c18c2	0	0	0	0	0	PLA2c16c0c18c2	0	0	0	2.22936	[0 +]	PLA2c16c0c18c2	0	0	0	0	0	PLA2c16c0c18c2	0	0	0	2.61338e-12	0	PLA2c16c0c18c2	0	0	0	1.13613	[0 +]	PLA2c16c0c18c2	0	0	0	4.21081e-12	0
PLA2c16c0c18c3	-1.14273e-23	0	0	0	0	PLA2c16c0c18c3	0	0	0	2.18249	[0 +]	PLA2c16c0c18c3	0	0	0	0	0	PLA2c16c0c18c3	0	0	0	1.75426e-12	0	PLA2c16c0c18c3	0	0	0	1.08863	[0 +]	PLA2c16c0c18c3	0	0	0	2.22828e-12	0
PLA2c18c1c16c0	0	0	0	0	0	PLA2c18c1c16c0	0	0	0	7.92328	[0 +]	PLA2c18c1c16c0	0	0	0	0	0	PLA2c18c1c16c0	0	0	0	1.30567e-12	0	PLA2c18c1c16c0	0	0	0	2.97488	[0 +]	PLA2c18c1c16c0	0	0	0	4.72866e-12	0
PLA2c18c1c18c1	0	0	0	0	0	PLA2c18c1c18c1	0	0	0	7.92328	[0 +]	PLA2c18c1c18c1	0	0	0	0	0	PLA2c18c1c18c1	0	0	0	7.14768e-12	0	PLA2c18c1c18c1	0	0	0	2.97488	[0 +]	PLA2c18c1c18c1	0	0	0	4.72679e-12	0
PLA2c18c1c18c2	0	0	0	0	0	PLA2c18c1c18c2	0	0	0	2.22936	[0 +]	PLA2c18c1c18c2	0	0	0	2.51233e-12	0	PLA2c18c1c18c2	0	0	0	0	0	PLA2c18c1c18c2	0	0	0	1.13613	[0 +]	PLA2c18c1c18c2	0	0	0	4.65034e-12	0
PLA2c18c1c18c3	0	0	0	0	0	PLA2c18c1c18c3	0	0	0	2.18249	[0 +]	PLA2c18c1c18c3	0	0	0	1.83775e-12	0	PLA2c18c1c18c3	0	0	0	3.58469e-12	0	PLA2c18c1c18c3	0	0	0	1.08863	[0 +]	PLA2c18c1c18c3	0	0	0	2.17769e-12	0
PLA2c18c218c2	0	0	0	0	0	PLA2c18c218c2	0	0	0	7.92328	[0 +]	PLA2c18c218c2	0	0	0	1.60824e-12	0	PLA2c18c218c2	0	0	0	6.94697e-12	0	PLA2c18c218c2	0	0	0	2.97488	[0 +]	PLA2c18c218c2	0	0	0	2.14788e-12	0
PLA2c18c218c3	1.59936e-23	0	0	0	0	PLA2c18c218c3	0	0	0	2.04859	[0 +]	PLA2c18c218c3	0	0	0	1.60122e-12	0	PLA2c18c218c3	0	0	0	2.19223e-13	0	PLA2c18c218c3	0	0	0	1.08863	[0 +]	PLA2c18c218c3	-2.76526e-28	0	0	2.16964e-12	0
PLA2c18c2c16c0	0	0	0	0	0	PLA2c18c2c16c0	0	0	0	7.92328	[0 +]	PLA2c18c2c16c0	-3.59234e-25	0	0	0	0	PLA2c18c2c16c0	0	0	0	6.93853e-12	0	PLA2c18c2c16c0	0	0	0	2.97488	[0 +]	PLA2c18c2c16c0	0	0	0	2.19038e-12	0
PLA2c18c2c18c1	0	0	0	0	0	PLA2c18c2c18c1	0	0	0	7.92328	[0 +]	PLA2c18c2c18c1	0	0	0	1.67839e-12	0	PLA2c18c2c18c1	0	0	0	6.93853e-12	0	PLA2c18c2c18c1	0	0	0	2.97488	[0 +]	PLA2c18c2c18c1	0	0	0	2.18397e-12	0
PLA2c18c3c16c0	0	0	0	0	0	PLA2c18c3c16c0	0	0	0	7.92328	[0 +]	PLA2c18c3c16c0	0	1.91404e-32	0	1.407e-12	0	PLA2c18c3c16c0	0	0	0	9.2175e-12	0	PLA2c18c3c16c0	0	0	0	2.97488	[0 +]	PLA2c18c3c16c0	0	0	0	2.17387e-12	0
PLA2c18c3c18c1	0	0	0	0	0	PLA2c18c3c18c1	0	0	0	7.92328	[0 +]	PLA2c18c3c18c1	0	0	0	1.59088e-12	0	PLA2c18c3c18c1	0	0	0	7.42161e-12	0	PLA2c18c3c18c1	0	0	0	2.97488	[0 +]	PLA2c18c3c18c1	0	0	0	2.19618e-12	0
PLA2c18c3c18c2	0	0	0	0	0	PLA2c18c3c18c2	0	0	0	7.92328	[0 +]	PLA2c18c3c18c2	0	0	0	1.58919e-12	0	PLA2c18c3c18c2	0	0	0	9.41889e-12	0	PLA2c18c3c18c2	0	0	0	2.97488	[0 +]	PLA2c18c3c18c2	0	0	0	2.15753e-12	0
PLA2c18c3c18c3	-1.07934e-26	0	0	0	0	PLA2c18c3c18c3	0	0	0	7.92328	[0 +]	PLA2c18c3c18c3	-4.51899e-26	0	0	0	0	PLA2c18c3c18c3	0	0	0	9.0733e-12	0	PLA2c18c3c18c3	0	0	0	2.97488	[0 +]	PLA2c18c3c18c3	0	0	0	2.18436e-12	0
PORPHOBILSYNTHRXN	0	0	0	0	0	PORPHOBILSYNTHRXN	0	0	0	0	0	PORPHOBILSYNTHRXN	0	0	0	0	0	PORPHOBILSYNTHRXN	0	0	0	0	0	PORPHOBILSYNTHRXN	0	0	0	0	0	PORPHOBILSYNTHRXN	0	0	0	0	0
PRAIsomRxnChloroplast	0	0	0	0	0	PRAIsomRxnChloroplast	0	0	0	0	0	PRAIsomRxnChloroplast	0	0	0	0	0	PRAIsomRxnChloroplast	0	0	0	0	0	PRAIsomRxnChloroplast	0	0	0	0	0	PRAIsomRxnChloroplast	0	0	0	0	0
PrephenateTransamineRxnChloroplast	0	0	0	0	0	PrephenateTransamineRxnChloroplast	0	8.0202e-15	0	2.32894e-06	[0 +]	PrephenateTransamineRxnChloroplast	0	0	0	5.91599e-14	0	PrephenateTransamineRxnChloroplast	0	0	0	1.54959e-14	0	PrephenateTransamineRxnChloroplast	0	0	0	4.62751e-06	[0 +]	PrephenateTransamineRxnChloroplast	0	0	0	1.10139e-13	0
PRIBFAICARPISOMRXNChloroplast	0	0	0	0	0	PRIBFAICARPISOMRXNChloroplast	0	7.78121e-16	0	2.4348e-06	[0 +]	PRIBFAICARPISOMRXNChloroplast	0	0	0	0	0	PRIBFAICARPISOMRXNChloroplast	0	0	0	0	0	PRIBFAICARPISOMRXNChloroplast	0	0	0	5.43499e-06	[0 +]	PRIBFAICARPISOMRXNChloroplast	0	0	0	0	0
ProteinSink	0	0	0	0	0	ProteinSink	0	4.4864e-12	0	0.000136158	[0 +]	ProteinSink	0	0	0	0	0	ProteinSink	0	0	0	0	0	ProteinSink	0	0	0	0.000248563	[0 +]	ProteinSink	0	0	0	3.49203e-14	0
PROTOPORGENOXIRXN	0	0	0	0	0	PROTOPORGENOXIRXN	0	0	0	0	0	PROTOPORGENOXIRXN	0	0	0	0	0	PROTOPORGENOXIRXN	0	0	0	0	0	PROTOPORGENOXIRXN	0	0	0	0	0	PROTOPORGENOXIRXN	0	0	0	0	0
PRPPAMIDOTRANSRXN	0	0	0	0	0	PRPPAMIDOTRANSRXN	0	0	0	0	0	PRPPAMIDOTRANSRXN	0	0	0	0	0	PRPPAMIDOTRANSRXN	0	0	0	0	0	PRPPAMIDOTRANSRXN	0	0	0	0	0	PRPPAMIDOTRANSRXN	0	0	0	0	0
PRPPSYNRXNChloroplast	0	0	0	3.56129e-13	0	PRPPSYNRXNChloroplast	0	7.78121e-16	0	2.4348e-06	[0 +]	PRPPSYNRXNChloroplast	0	0	0	-1.11653e-13	0	PRPPSYNRXNChloroplast	0	0	0	-1.24361e-13	0	PRPPSYNRXNChloroplast	0	0	0	5.43499e-06	[0 +]	PRPPSYNRXNChloroplast	0	0	0	-1.446e-13	0
PRTransRxnChloroplast	0	0	0	0	0	PRTransRxnChloroplast	0	0	0	0	0	PRTransRxnChloroplast	0	0	0	0	0	PRTransRxnChloroplast	0	0	0	0	0	PRTransRxnChloroplast	0	0	0	0	0	PRTransRxnChloroplast	0	0	0	0	0
PSERTRANSAMRXN	0	5.20376e-33	0	0	0	PSERTRANSAMRXN	0	8.62452e-15	0	7.92328	[0 +]	PSERTRANSAMRXN	0	0	0	6.68851e-12	0	PSERTRANSAMRXN	0	0	0	1.37641e-11	0	PSERTRANSAMRXN	0	0	0	5.94975	[0 +]	PSERTRANSAMRXN	0	1.91601e-29	0	2.36014e-11	0
PYRROLINECARBDEHYDROGRXN	-8.87259e-26	-1.04465e-32	0	0	0	PYRROLINECARBDEHYDROGRXN	0	-3.11258e-15	0	7.92328	[0 +]	PYRROLINECARBDEHYDROGRXN	6.38381e-26	0	0	8.40304e-12	0	PYRROLINECARBDEHYDROGRXN	0	2.90552e-32	0	3.34617e-12	0	PYRROLINECARBDEHYDROGRXN	4.19373e-14	0	0	2.97488	[0 +]	PYRROLINECARBDEHYDROGRXN	2.28721e-14	-7.22789e-16	0	8.0635e-12	0
PYRROLINECARBREDUCTRXNPRONADLDELTA1PYRROLINE5CARBOXYLATENADHPROTON54	0	0	0	1000	[0 +1000]	PYRROLINECARBREDUCTRXNPRONADLDELTA1PYRROLINE5CARBOXYLATENADHPROTON54	0	0	0	1000	[0 +1000]	PYRROLINECARBREDUCTRXNPRONADLDELTA1PYRROLINE5CARBOXYLATENADHPROTON54	0	0	0	1000	[0 +1000]	PYRROLINECARBREDUCTRXNPRONADLDELTA1PYRROLINE5CARBOXYLATENADHPROTON54	0	0	0	1000	[0 +1000]	PYRROLINECARBREDUCTRXNPRONADLDELTA1PYRROLINE5CARBOXYLATENADHPROTON54	0	0	0	1000	[0 +1000]	PYRROLINECARBREDUCTRXNPRONADLDELTA1PYRROLINE5CARBOXYLATENADHPROTON54	0	0	0	1000	[0 +1000]
PYRROLINECARBREDUCTRXNPRONADPLDELTA1PYRROLINE5CARBOXYLATENADPHPROTON56	0	0	0	0	0	PYRROLINECARBREDUCTRXNPRONADPLDELTA1PYRROLINE5CARBOXYLATENADPHPROTON56	0	0	0	15.8466	[0 +]	PYRROLINECARBREDUCTRXNPRONADPLDELTA1PYRROLINE5CARBOXYLATENADPHPROTON56	0	0	0	9.1228e-12	0	PYRROLINECARBREDUCTRXNPRONADPLDELTA1PYRROLINE5CARBOXYLATENADPHPROTON56	0	0	0	1.44736e-11	0	PYRROLINECARBREDUCTRXNPRONADPLDELTA1PYRROLINE5CARBOXYLATENADPHPROTON56	5.3382	0	0	5.94975	[0 +]	PYRROLINECARBREDUCTRXNPRONADPLDELTA1PYRROLINE5CARBOXYLATENADPHPROTON56	0	0	0	1.26396e-11	0
PYRUVATEORTHOPHOSPHATEDIKINASERXNchloroplast	-8.70461e-14	1.00414e-11	6.11547e-13	9.48233e-12	0	PYRUVATEORTHOPHOSPHATEDIKINASERXNchloroplast	-8.52568	-3.61513	-15.8466	15.8466	[- +]	PYRUVATEORTHOPHOSPHATEDIKINASERXNchloroplast	1.15064e-24	1.09382e-11	-5.89434e-12	2.8029e-12	0	PYRUVATEORTHOPHOSPHATEDIKINASERXNchloroplast	-8.04018e-13	-1.26111e-28	-1.31219e-12	1.9695e-11	0	PYRUVATEORTHOPHOSPHATEDIKINASERXNchloroplast	1.45374e-26	-1.83233	-5.94975	5.94975	[- +]	PYRUVATEORTHOPHOSPHATEDIKINASERXNchloroplast	-5.54276e-17	-2.01308e-28	-8.96364e-12	8.37901e-12	0
RIB5PISOMRXNchloroplast	16.6667	16.6667	16.6667	16.6667	+	RIB5PISOMRXNchloroplast	16.6296	16.6296	16.6296	16.6296	[+ +]	RIB5PISOMRXNchloroplast	16.6296	16.6296	16.6296	16.6296	+	RIB5PISOMRXNchloroplast	26.6667	26.6667	26.6667	26.6667	+	RIB5PISOMRXNchloroplast	26.9719	26.9719	26.9719	26.972	[+ +]	RIB5PISOMRXNchloroplast	26.9719	26.9719	26.9719	26.9719	+
RIBULOSEBISPHOSPHATECARBOXYLASERXNchloroplast	50	50	50	50	+	RIBULOSEBISPHOSPHATECARBOXYLASERXNchloroplast	49.8888	49.8888	49.8887	55.171	[+ +]	RIBULOSEBISPHOSPHATECARBOXYLASERXNchloroplast	49.8888	49.8888	49.8888	49.8888	+	RIBULOSEBISPHOSPHATECARBOXYLASERXNchloroplast	60	60	60	60	+	RIBULOSEBISPHOSPHATECARBOXYLASERXNchloroplast	60.6869	60.6869	60.6868	60.687	[+ +]	RIBULOSEBISPHOSPHATECARBOXYLASERXNchloroplast	60.6869	60.6869	60.6869	60.6869	+
RIBULP3EPIMRXNchloroplast	-33.3333	-33.3333	-33.3333	-33.3333	-	RIBULP3EPIMRXNchloroplast	-33.2592	-33.2592	-33.2593	-33.2592	[- -]	RIBULP3EPIMRXNchloroplast	-33.2592	-33.2592	-33.2592	-33.2592	-	RIBULP3EPIMRXNchloroplast	-53.3333	-53.3333	-53.3333	-53.3333	-	RIBULP3EPIMRXNchloroplast	-53.9439	-53.9439	-53.9439	-53.9438	[- -]	RIBULP3EPIMRXNchloroplast	-53.9439	-53.9439	-53.9439	-53.9439	-
RNAPolymerasemod	0	0	0	0	0	RNAPolymerasemod	0	0	0	0	0	RNAPolymerasemod	0	0	0	0	0	RNAPolymerasemod	0	0	0	0	0	RNAPolymerasemod	0	0	0	0	0	RNAPolymerasemod	0	0	0	0	0
RXN01132Chloroplast	-4.92773e-24	0	0	0	0	RXN01132Chloroplast	7.50139	12.4119	0.180497	16.0271	[+ +]	RXN01132Chloroplast	16.0271	16.0271	16.0271	16.0271	+	RXN01132Chloroplast	0	4.64699e-32	0	7.19484e-13	0	RXN01132Chloroplast	16.2467	14.4144	10.2969	16.2467	[+ +]	RXN01132Chloroplast	16.2467	16.2467	16.2467	16.2467	+
RXN01132mitochondrion	1.44819e-13	0	0	0	0	RXN01132mitochondrion	1.0957e-13	-8.03109e-31	0	5.35655e-05	[0 +]	RXN01132mitochondrion	-5.056e-25	0	0	4.427e-13	0	RXN01132mitochondrion	4.74711e-13	8.03109e-31	0	1.98912e-12	0	RXN01132mitochondrion	1.09349e-13	4.3732e-15	1.72469e-20	5.78438e-05	[0 +]	RXN01132mitochondrion	1.07133e-13	4.75876e-15	0	7.68554e-13	0
RXN01133Chloroplast	-4.93229e-24	0	0	0	0	RXN01133Chloroplast	7.50139	12.4119	0.180497	16.0271	[+ +]	RXN01133Chloroplast	16.0271	16.0271	16.0271	16.0271	+	RXN01133Chloroplast	0	4.64699e-32	0	7.19484e-13	0	RXN01133Chloroplast	16.2467	14.4144	10.2969	16.2467	[+ +]	RXN01133Chloroplast	16.2467	16.2467	16.2467	16.2467	+
RXN01133mitochondrion	1.44819e-13	0	0	0	0	RXN01133mitochondrion	1.0957e-13	-8.03109e-31	0	5.35655e-05	[0 +]	RXN01133mitochondrion	-5.06146e-25	0	0	4.427e-13	0	RXN01133mitochondrion	4.74711e-13	8.03109e-31	0	1.98912e-12	0	RXN01133mitochondrion	1.09349e-13	4.3732e-15	1.72469e-20	5.78438e-05	[0 +]	RXN01133mitochondrion	1.07133e-13	4.75876e-15	0	7.68554e-13	0
RXN01134Chloroplast	-4.92639e-24	0	0	0	0	RXN01134Chloroplast	7.50139	12.4119	0.180497	16.0271	[+ +]	RXN01134Chloroplast	16.0271	16.0271	16.0271	16.0271	+	RXN01134Chloroplast	0	4.64699e-32	0	7.19484e-13	0	RXN01134Chloroplast	16.2467	14.4144	10.2969	16.2467	[+ +]	RXN01134Chloroplast	16.2467	16.2467	16.2467	16.2467	+
RXN01134mitochondrion	1.44819e-13	0	0	0	0	RXN01134mitochondrion	1.0957e-13	-8.03109e-31	0	5.35655e-05	[0 +]	RXN01134mitochondrion	-5.04751e-25	0	0	4.427e-13	0	RXN01134mitochondrion	4.74711e-13	8.03109e-31	0	1.98912e-12	0	RXN01134mitochondrion	1.09349e-13	4.3732e-15	1.72469e-20	5.78438e-05	[0 +]	RXN01134mitochondrion	1.07133e-13	4.75876e-15	0	7.68554e-13	0
RXN01461	0	0	0	0	0	RXN01461	0	0	0	0	0	RXN01461	0	0	0	0	0	RXN01461	0	0	0	0	0	RXN01461	0	0	0	0	0	RXN01461	0	0	0	0	0
Rxn02381Chloroplast	0	0	0	0	0	Rxn02381Chloroplast	0	0	0	0	0	Rxn02381Chloroplast	0	0	0	0	0	Rxn02381Chloroplast	0	0	0	0	0	Rxn02381Chloroplast	0	0	0	0	0	Rxn02381Chloroplast	0	0	0	0	0
Rxn02382Chloroplast	0	0	0	0	0	Rxn02382Chloroplast	0	0	0	0	0	Rxn02382Chloroplast	0	0	0	0	0	Rxn02382Chloroplast	0	0	0	0	0	Rxn02382Chloroplast	0	0	0	0	0	Rxn02382Chloroplast	0	0	0	0	0
RXN0302Chloroplast	0	0	0	0	0	RXN0302Chloroplast	0	0	0	0	0	RXN0302Chloroplast	0	0	0	0	0	RXN0302Chloroplast	0	0	0	0	0	RXN0302Chloroplast	0	0	0	0	0	RXN0302Chloroplast	0	0	0	0	0
RXN0366	0	0	0	0	0	RXN0366	0	0	0	0	0	RXN0366	0	0	0	0	0	RXN0366	0	0	0	0	0	RXN0366	0	0	0	0	0	RXN0366	0	0	0	0	0
RXN05055	0	0	0	0	0	RXN05055	0	0	0	0	0	RXN05055	0	0	0	0	0	RXN05055	0	0	0	0	0	RXN05055	0	0	0	0	0	RXN05055	0	0	0	0	0
RXN05114	0	0	0	0	0	RXN05114	0	8.62452e-15	0	7.92328	[0 +]	RXN05114	0	0	0	6.68851e-12	0	RXN05114	0	0	0	1.37641e-11	0	RXN05114	0	0	0	5.94975	[0 +]	RXN05114	0	0	0	2.36014e-11	0
RXN05224	1.25792e-13	0	0	0	0	RXN05224	7.32063	1.80756	0	15.8466	[0 +]	RXN05224	3.08755e-25	-1.51773e-17	0	3.02855e-13	0	RXN05224	0	0	0	1.98205e-11	0	RXN05224	5.94897	0	0	16.0642	[0 +]	RXN05224	10.1145	0	0	10.1145	[0 +]
RXN05224chloroplast	-2.75718e-25	1.21734e-16	0	0	0	RXN05224chloroplast	14.2195	14.2195	14.2195	16.8606	[+ +]	RXN05224chloroplast	14.2195	14.2195	14.2195	14.2195	+	RXN05224chloroplast	1.28107e-31	1.28126e-15	1.50825e-25	2.98783e-12	0	RXN05224chloroplast	14.4144	14.4144	14.4143	15.406	[+ +]	RXN05224chloroplast	14.4144	14.4144	14.4144	14.4144	+
RXN06491modmitochondrion	0	0	0	0	0	RXN06491modmitochondrion	0	0	0	0	0	RXN06491modmitochondrion	0	0	0	0	0	RXN06491modmitochondrion	0	0	0	0	0	RXN06491modmitochondrion	0	0	0	0	0	RXN06491modmitochondrion	0	0	0	0	0
RXN0882Chloroplast	0	0	0	0	0	RXN0882Chloroplast	0	0	0	0	0	RXN0882Chloroplast	0	0	0	0	0	RXN0882Chloroplast	0	0	0	0	0	RXN0882Chloroplast	0	0	0	0	0	RXN0882Chloroplast	0	0	0	0	0
RXN0884CPD4211NADPWATERHYDROXYMETHYLBUTENYLDIPNADPHPROTON61Chloroplast	0	0	0	0	0	RXN0884CPD4211NADPWATERHYDROXYMETHYLBUTENYLDIPNADPHPROTON61Chloroplast	0	0	0	0	0	RXN0884CPD4211NADPWATERHYDROXYMETHYLBUTENYLDIPNADPHPROTON61Chloroplast	0	0	0	0	0	RXN0884CPD4211NADPWATERHYDROXYMETHYLBUTENYLDIPNADPHPROTON61Chloroplast	0	0	0	0	0	RXN0884CPD4211NADPWATERHYDROXYMETHYLBUTENYLDIPNADPHPROTON61Chloroplast	0	0	0	0	0	RXN0884CPD4211NADPWATERHYDROXYMETHYLBUTENYLDIPNADPHPROTON61Chloroplast	0	0	0	0	0
RXN0884CPD4211NADWATERHYDROXYMETHYLBUTENYLDIPNADHPROTON59Chloroplast	0	0	0	0	0	RXN0884CPD4211NADWATERHYDROXYMETHYLBUTENYLDIPNADHPROTON59Chloroplast	0	0	0	0	0	RXN0884CPD4211NADWATERHYDROXYMETHYLBUTENYLDIPNADHPROTON59Chloroplast	0	0	0	0	0	RXN0884CPD4211NADWATERHYDROXYMETHYLBUTENYLDIPNADHPROTON59Chloroplast	0	0	0	0	0	RXN0884CPD4211NADWATERHYDROXYMETHYLBUTENYLDIPNADHPROTON59Chloroplast	0	0	0	0	0	RXN0884CPD4211NADWATERHYDROXYMETHYLBUTENYLDIPNADHPROTON59Chloroplast	0	0	0	0	0
RXN1063	0	0	0	0	0	RXN1063	0	0	0	0	0	RXN1063	0	0	0	0	0	RXN1063	0	0	0	0	0	RXN1063	0	0	0	0	0	RXN1063	0	0	0	0	0
RXN10938	0	0	0	0	0	RXN10938	0	0	0	15.8466	[0 +]	RXN10938	0	0	0	0	0	RXN10938	0	0	0	1.83405e-11	0	RXN10938	0	0	0	5.94975	[0 +]	RXN10938	0	0	0	8.39917e-12	0
RXN1101	0	0	0	0	0	RXN1101	0	8.58526e-16	0	2.60554e-08	0	RXN1101	0	0	0	3.56379e-17	0	RXN1101	0	0	0	0	0	RXN1101	0	0	0	4.75655e-08	0	RXN1101	0	0	0	6.68241e-18	0
RXN1102	0	0	0	0	0	RXN1102	0	8.58526e-16	0	2.60554e-08	0	RXN1102	0	0	0	3.56379e-17	0	RXN1102	0	0	0	0	0	RXN1102	0	0	0	4.75655e-08	0	RXN1102	0	0	0	6.68241e-18	0
RXN1103	0	0	0	0	0	RXN1103	0	4.51856e-15	0	1.37134e-07	0	RXN1103	0	0	0	0	0	RXN1103	0	0	0	0	0	RXN1103	0	0	0	2.50345e-07	0	RXN1103	0	0	0	1.03156e-13	0
RXN1104	0	0	0	0	0	RXN1104	0	0	0	1.11078e-07	0	RXN1104	0	0	0	0	0	RXN1104	0	0	0	0	0	RXN1104	0	0	0	2.02779e-07	0	RXN1104	0	0	0	1.02943e-13	0
RXN1106	0	0	0	0	0	RXN1106	0	3.66004e-15	0	1.11078e-07	0	RXN1106	0	0	0	0	0	RXN1106	0	0	0	0	0	RXN1106	0	0	0	2.02779e-07	0	RXN1106	0	0	0	2.84882e-17	0
RXN1125	0	0	0	0	0	RXN1125	0	2.34965e-15	0	7.13093e-08	0	RXN1125	0	0	0	0	0	RXN1125	0	0	0	0	0	RXN1125	0	0	0	1.30179e-07	0	RXN1125	0	0	0	1.82887e-17	0
RXN1126	0	0	0	0	0	RXN1126	0	4.51856e-15	0	1.37134e-07	0	RXN1126	0	0	0	0	0	RXN1126	0	0	0	0	0	RXN1126	0	0	0	2.50345e-07	0	RXN1126	0	0	0	3.51706e-17	0
RXN1142	0	0	0	0	0	RXN1142	0	2.34965e-15	0	7.13093e-08	0	RXN1142	0	0	0	0	0	RXN1142	0	0	0	0	0	RXN1142	0	0	0	1.30179e-07	0	RXN1142	0	0	0	1.82887e-17	0
RXN1143	0	0	0	0	0	RXN1143	0	2.34965e-15	0	7.13093e-08	0	RXN1143	0	0	0	0	0	RXN1143	0	0	0	0	0	RXN1143	0	0	0	1.30179e-07	0	RXN1143	0	0	0	1.82887e-17	0
RXN11501	0	0	0	0	0	RXN11501	0	0	0	7.92328	[0 +]	RXN11501	2.484e-26	0	0	0	0	RXN11501	0	0	0	1.07182e-11	0	RXN11501	0	0	0	2.97488	[0 +]	RXN11501	0	0	0	0	0
RXN11654	0	0	0	0	0	RXN11654	0	1.31039e-15	0	1.11078e-07	0	RXN11654	0	0	0	2.95728e-17	0	RXN11654	0	0	0	0	0	RXN11654	0	0	0	2.02779e-07	0	RXN11654	0	0	0	2.84882e-17	0
RXN12195	0	0	0	0	0	RXN12195	0	-1.39192e-15	0	15.8466	[0 +]	RXN12195	0	0	0	0	0	RXN12195	0	0	0	1.83405e-11	0	RXN12195	0	0	0	5.94975	[0 +]	RXN12195	0	0	0	8.39917e-12	0
RXN12196	0	0	0	0	0	RXN12196	0	0	0	15.8466	[0 +]	RXN12196	0	0	0	9.91506e-12	0	RXN12196	0	0	0	1.83347e-11	0	RXN12196	0	0	0	5.94975	[0 +]	RXN12196	3.33993e-17	0	0	4.48317e-12	0
RXN12199	0	0	0	0	0	RXN12199	0	0	0	7.92328	[0 +]	RXN12199	0	0	0	0	0	RXN12199	0	0	0	9.16894e-12	0	RXN12199	0	0	0	2.97488	[0 +]	RXN12199	5.40605e-32	0	5.40605e-32	0	0
RXN12200	-1.15855e-26	0	0	0	0	RXN12200	0	0	0	7.92328	[0 +]	RXN12200	0	-3.07605e-17	0	0	0	RXN12200	0	0	0	5.68081e-12	0	RXN12200	0	1.23042e-16	0	2.97488	[0 +]	RXN12200	0	7.88636e-17	0	4.13191e-12	0
RXN1223	0	0	0	0	0	RXN1223	0	0	0	0	0	RXN1223	0	0	0	0	0	RXN1223	0	0	0	0	0	RXN1223	0	0	0	0	0	RXN1223	0	0	0	0	0
RXN1224	0	0	0	0	0	RXN1224	0	0	0	0	0	RXN1224	0	0	0	0	0	RXN1224	0	0	0	0	0	RXN1224	0	0	0	0	0	RXN1224	0	0	0	0	0
RXN1225	0	0	0	0	0	RXN1225	0	0	0	0	0	RXN1225	0	0	0	0	0	RXN1225	0	0	0	0	0	RXN1225	0	0	0	0	0	RXN1225	0	0	0	0	0
RXN13158Chloroplast	8.44337e-26	0	0	-3.86434e-14	0	RXN13158Chloroplast	0	5.44694e-15	0	2.81924e-06	[0 +]	RXN13158Chloroplast	0	0	0	2.03239e-13	0	RXN13158Chloroplast	0	0	0	1.66001e-13	0	RXN13158Chloroplast	0	0	0	5.43499e-06	[0 +]	RXN13158Chloroplast	0	0	0	9.5412e-14	0
RXN13163Chloroplast	-8.44297e-26	0	3.86434e-14	0	0	RXN13163Chloroplast	0	-5.44694e-15	-2.81924e-06	0	[- 0]	RXN13163Chloroplast	0	0	-2.03239e-13	0	0	RXN13163Chloroplast	0	0	-1.66001e-13	0	0	RXN13163Chloroplast	0	0	-5.43499e-06	0	[- 0]	RXN13163Chloroplast	0	0	-9.5412e-14	0	0
RXN13191	0	0	0	1.62599e-15	0	RXN13191	0	0	0	1.90068e-28	0	RXN13191	0	0	0	-3.13053e-14	0	RXN13191	0	0	0	-1.01338e-14	0	RXN13191	0	0	0	6.89166e-21	0	RXN13191	0	0	0	2.26297e-14	0
RXN13398	0	0	0	0	0	RXN13398	0	0	0	0	0	RXN13398	0	0	0	0	0	RXN13398	0	0	0	0	0	RXN13398	0	0	0	0	0	RXN13398	0	0	0	0	0
RXN13462Chloroplast	0	0	0	0	0	RXN13462Chloroplast	0	7.78121e-16	0	2.4348e-06	[0 +]	RXN13462Chloroplast	0	0	0	0	0	RXN13462Chloroplast	0	0	0	0	0	RXN13462Chloroplast	0	0	0	5.54667e-06	[0 +]	RXN13462Chloroplast	0	0	0	0	0
RXN1382	0	0	0	1.49004e-14	0	RXN1382	0	1.39192e-15	-2.81481e-25	4.3198e-07	0	RXN1382	0	0	0	-1.34068e-15	0	RXN1382	0	0	3.51837e-41	1.38184e-14	0	RXN1382	0	0	0	8.18821e-07	0	RXN1382	0	0	0	1.73502e-14	0
RXN1461	0	0	0	0	0	RXN1461	0	1.09314e-14	0	7.92328	[0 +]	RXN1461	0	0	0	0	0	RXN1461	0	0	0	1.07449e-11	0	RXN1461	0	0	0	2.97488	[0 +]	RXN1461	0	0	0	0	0
RXN1685	0	0	0	0	0	RXN1685	0	0	0	7.92328	[0 +]	RXN1685	0	0	0	0	0	RXN1685	0	0	0	1.07449e-11	0	RXN1685	0	0	0	2.97488	[0 +]	RXN1685	0	0	0	0	0
RXN1781	0	0	0	0	0	RXN1781	0	0	0	0	0	RXN1781	0	0	0	0	0	RXN1781	0	0	0	0	0	RXN1781	0	0	0	0	0	RXN1781	0	0	0	0	0
RXN1841	0	0	0	0	0	RXN1841	0	0	0	0	0	RXN1841	0	0	0	0	0	RXN1841	0	0	0	0	0	RXN1841	0	0	0	0	0	RXN1841	0	0	0	0	0
RXN18411KESTOTRIOSEWATERBETADFRUCTOSESUCROSE45	0	0	0	0	0	RXN18411KESTOTRIOSEWATERBETADFRUCTOSESUCROSE45	0	0	0	0	0	RXN18411KESTOTRIOSEWATERBETADFRUCTOSESUCROSE45	0	0	0	0	0	RXN18411KESTOTRIOSEWATERBETADFRUCTOSESUCROSE45	0	0	0	0	0	RXN18411KESTOTRIOSEWATERBETADFRUCTOSESUCROSE45	0	0	0	0	0	RXN18411KESTOTRIOSEWATERBETADFRUCTOSESUCROSE45	0	0	0	0	0
RXN1882	0	0	0	0	0	RXN1882	0	-3.98078e-15	0	7.92328	[0 +]	RXN1882	0	0	0	2.28513e-12	0	RXN1882	0	-1.69571e-28	0	8.53599e-12	0	RXN1882	0	0	0	2.97488	[0 +]	RXN1882	0	0	0	5.46047e-12	0
RXN1884	0	0	0	0	0	RXN1884	0	0	0	0	0	RXN1884	0	0	0	0	0	RXN1884	0	0	0	0	0	RXN1884	0	0	0	0	0	RXN1884	0	0	0	0	0
RXN1F10	0	0	0	0	0	RXN1F10	0	0	0	0	0	RXN1F10	0	0	0	0	0	RXN1F10	0	0	0	0	0	RXN1F10	0	0	0	0	0	RXN1F10	0	0	0	0	0
RXN1F20	0	0	0	0	0	RXN1F20	0	0	0	0	0	RXN1F20	0	0	0	0	0	RXN1F20	0	0	0	0	0	RXN1F20	0	0	0	0	0	RXN1F20	0	0	0	0	0
RXN1F66	1.22963e-23	0	-1.13619e-25	-1.81047e-25	0	RXN1F66	0	0	0	1.90068e-28	0	RXN1F66	0	0	0	0	0	RXN1F66	0	0	0	0	0	RXN1F66	0	0	0	4.20421e-21	0	RXN1F66	0	0	0	0	0
RXN1F72	0	0	0	0	0	RXN1F72	0	0	0	0	0	RXN1F72	0	0	0	0	0	RXN1F72	0	0	0	0	0	RXN1F72	0	0	0	0	0	RXN1F72	0	0	0	0	0
RXN2121	0	0	0	0	0	RXN2121	0	0	0	0	0	RXN2121	0	0	0	0	0	RXN2121	0	0	0	0	0	RXN2121	0	0	0	0	0	RXN2121	0	0	0	0	0
RXN2122	0	0	0	0	0	RXN2122	0	0	0	0	0	RXN2122	0	0	0	0	0	RXN2122	0	0	0	0	0	RXN2122	0	0	0	0	0	RXN2122	0	0	0	0	0
RXN2581	0	0	0	0	0	RXN2581	0	0	0	1.11078e-07	0	RXN2581	0	0	0	0	0	RXN2581	0	0	0	0	0	RXN2581	0	0	0	2.02779e-07	0	RXN2581	0	0	0	1.02943e-13	0
RXN2601	0	0	0	0	0	RXN2601	0	-8.58526e-16	0	1.11078e-07	0	RXN2601	0	0	0	0	0	RXN2601	0	0	0	0	0	RXN2601	0	0	0	2.02779e-07	0	RXN2601	0	0	0	1.02943e-13	0
RXN2621	0	0	0	0	0	RXN2621	0	0	0	1.11078e-07	0	RXN2621	0	0	0	0	0	RXN2621	0	0	0	0	0	RXN2621	0	0	0	2.02779e-07	0	RXN2621	0	0	0	1.02943e-13	0
RXN2622	0	0	0	0	0	RXN2622	0	-8.58526e-16	0	1.11078e-07	0	RXN2622	0	0	0	0	0	RXN2622	0	0	0	0	0	RXN2622	0	0	0	2.02779e-07	0	RXN2622	0	0	0	1.02943e-13	0
RXN2944	0	0	0	0	0	RXN2944	0	0	0	7.92328	[0 +]	RXN2944	0	0	0	0	0	RXN2944	0	0	0	1.07196e-11	0	RXN2944	0	0	0	2.97488	[0 +]	RXN2944	0	0	0	4.26727e-12	0
RXN2981	0	0	0	0	0	RXN2981	0	0	0	7.92328	[0 +]	RXN2981	0	0	0	0	0	RXN2981	0	0	0	1.07196e-11	0	RXN2981	0	0	0	2.97488	[0 +]	RXN2981	0	0	0	4.26727e-12	0
RXN3521	0	0	0	0	0	RXN3521	0	0	0	2.67828e-05	[0 +]	RXN3521	0	0	0	3.13735e-13	0	RXN3521	0	0	0	9.6561e-13	0	RXN3521	-7.36789e-28	0	0	8.09814e-05	[0 +]	RXN3521	0	0	0	4.2771e-13	0
RXN3521chloroplast	0	0	0	0	0	RXN3521chloroplast	0	0	0	2.71496e-05	[0 +]	RXN3521chloroplast	0	0	0	4.80405e-13	0	RXN3521chloroplast	0	0	0	1.99615e-12	0	RXN3521chloroplast	0	0	0	8.20907e-05	[0 +]	RXN3521chloroplast	0	0	0	0	0
RXN3522	0	0	0	0	0	RXN3522	0	0	0	2.67828e-05	[0 +]	RXN3522	-1.12723e-24	0	0	3.13735e-13	0	RXN3522	0	0	0	9.6561e-13	0	RXN3522	-7.36789e-28	0	0	8.09814e-05	[0 +]	RXN3522	0	0	0	4.2771e-13	0
RXN3523	0	0	0	0	0	RXN3523	0	0	0	2.67828e-05	[0 +]	RXN3523	0	0	0	2.26482e-14	0	RXN3523	0	0	0	9.6561e-13	0	RXN3523	0	0	0	8.09814e-05	[0 +]	RXN3523	0	0	0	4.2771e-13	0
RXN3523chloroplast	0	0	0	0	0	RXN3523chloroplast	0	0	0	2.71496e-05	[0 +]	RXN3523chloroplast	-2.29095e-28	0	0	1.07844e-12	0	RXN3523chloroplast	0	0	0	1.51881e-12	0	RXN3523chloroplast	0	0	0	8.20907e-05	[0 +]	RXN3523chloroplast	0	0	0	0	0
RXN3O1380	0	0	0	0	0	RXN3O1380	0	0	0	0	0	RXN3O1380	0	0	0	0	0	RXN3O1380	0	0	0	0	0	RXN3O1380	0	0	0	0	0	RXN3O1380	0	0	0	0	0
RXN4FS2	0	0	0	0	0	RXN4FS2	0	0	0	0	0	RXN4FS2	0	0	0	0	0	RXN4FS2	0	0	0	0	0	RXN4FS2	0	0	0	0	0	RXN4FS2	0	0	0	0	0
RXN4FS3	0	0	0	0	0	RXN4FS3	0	0	0	0	0	RXN4FS3	0	0	0	0	0	RXN4FS3	0	0	0	0	0	RXN4FS3	0	0	0	0	0	RXN4FS3	0	0	0	0	0
RXN5641	0	0	0	0	0	RXN5641	7.10266e-17	0	0	4.3198e-07	0	RXN5641	0	0	0	0	0	RXN5641	0	0	0	1.38487e-14	0	RXN5641	0	0	0	8.18821e-07	0	RXN5641	0	0	0	1.73258e-14	0
Rxn5682Chloroplast	0	0	0	0	0	Rxn5682Chloroplast	0	5.68579e-15	0	2.32894e-06	[0 +]	Rxn5682Chloroplast	0	0	0	5.91599e-14	0	Rxn5682Chloroplast	0	0	0	1.54959e-14	0	Rxn5682Chloroplast	0	0	0	4.62751e-06	[0 +]	Rxn5682Chloroplast	0	0	0	1.10139e-13	0
RXN6161	0	0	0	0	0	RXN6161	8.52568	3.61513	0	15.8466	[0 +]	RXN6161	0	0	0	1.91088e-11	0	RXN6161	0	0	0	9.54696e-13	0	RXN6161	0	1.83233	0	5.94975	[0 +]	RXN6161	0	7.8371e-30	0	8.87214e-12	0
RXN6182	995.833	0	0	995.833	[0 +]	RXN6182	1000	0	0	1000	[0 +1000]	RXN6182	1000	0	0	1000	[0 +1000]	RXN6182	995.833	0	0	995.833	[0 +]	RXN6182	1000	0	0	1000	[0 +1000]	RXN6182	1000	0	0	1000	[0 +1000]
RXN661	0	0	0	0	0	RXN661	0	0	0	2.67828e-05	[0 +]	RXN661	-5.8345e-26	0	0	4.91271e-14	0	RXN661	0	0	0	1.18257e-13	0	RXN661	0	0	0	8.09814e-05	[0 +]	RXN661	0	0	0	0	0
RXN663	-1.83743e-25	0	0	0	0	RXN663	8.52568	3.61513	0	15.8466	[0 +]	RXN663	0	0	0	1.91088e-11	0	RXN663	0	0	0	9.54696e-13	0	RXN663	0	1.83233	0	5.94975	[0 +]	RXN663	0	7.8371e-30	0	8.87214e-12	0
RXN6902	0	0	0	0	0	RXN6902	0	0	0	5.35655e-05	[0 +]	RXN6902	0	0	0	6.37332e-13	0	RXN6902	0	0	0	2.09377e-13	0	RXN6902	0	0	0	3.52093e-05	[0 +]	RXN6902	0	4.75876e-15	0	8.60505e-13	0
RXN743	0	0	0	0	0	RXN743	0	0	0	0	0	RXN743	0	0	0	0	0	RXN743	0	0	0	0	0	RXN743	0	0	0	0	0	RXN743	0	0	0	0	0
RXN7609	0	0	0	0	0	RXN7609	0	0	0	0	0	RXN7609	0	0	0	0	0	RXN7609	0	0	0	0	0	RXN7609	0	0	0	0	0	RXN7609	0	0	0	0	0
RXN7658	1.22963e-23	0	0	0	0	RXN7658	0	0	0	0	0	RXN7658	0	0	0	0	0	RXN7658	0	0	0	0	0	RXN7658	0	0	0	0	0	RXN7658	0	0	0	0	0
RXN7659	1.22963e-23	0	0	0	0	RXN7659	0	0	0	0	0	RXN7659	0	0	0	0	0	RXN7659	0	0	0	0	0	RXN7659	0	0	0	0	0	RXN7659	0	0	0	0	0
RXN7660	1.22963e-23	0	0	0	0	RXN7660	0	0	0	0	0	RXN7660	0	0	0	0	0	RXN7660	0	0	0	0	0	RXN7660	0	0	0	0	0	RXN7660	0	0	0	0	0
RXN7663	-1.22963e-23	0	0	0	0	RXN7663	0	0	0	0	0	RXN7663	0	0	0	0	0	RXN7663	0	0	0	0	0	RXN7663	0	0	0	0	0	RXN7663	0	0	0	0	0
RXN7664	-1.22963e-23	0	0	0	0	RXN7664	0	0	0	0	0	RXN7664	0	0	0	0	0	RXN7664	0	0	0	0	0	RXN7664	0	0	0	0	0	RXN7664	0	0	0	0	0
RXN7665	-1.22963e-23	0	0	0	0	RXN7665	0	0	0	0	0	RXN7665	0	0	0	0	0	RXN7665	0	0	0	0	0	RXN7665	0	0	0	0	0	RXN7665	0	0	0	0	0
RXN7666	0	0	0	0	0	RXN7666	0	0	0	0	0	RXN7666	0	0	0	0	0	RXN7666	0	0	0	0	0	RXN7666	0	0	0	0	0	RXN7666	0	0	0	0	0
RXN7674	0	0	0	0	0	RXN7674	0	0	0	0	0	RXN7674	0	0	0	0	0	RXN7674	0	0	0	0	0	RXN7674	0	0	0	0	0	RXN7674	0	0	0	0	0
RXN7710modchloroplast	0	0	0	0	0	RXN7710modchloroplast	0	0	0	0	0	RXN7710modchloroplast	0	0	0	0	0	RXN7710modchloroplast	0	0	0	0	0	RXN7710modchloroplast	0	0	0	0	0	RXN7710modchloroplast	0	0	0	0	0
RXN7903	-4.25952e-27	0	0	0	0	RXN7903	1.56656	1.56656	1.56655	1.56656	[+ +]	RXN7903	1.56656	1.56656	1.56656	1.56656	+	RXN7903	0	0	0	2.75018e-13	0	RXN7903	1.58802	1.58802	1.58802	1.58803	[+ +]	RXN7903	1.58802	1.58802	1.58802	1.58802	+
RXN8001Chloroplast	0	0	0	3.56129e-13	0	RXN8001Chloroplast	0	7.78121e-16	0	2.4348e-06	[0 +]	RXN8001Chloroplast	0	0	0	-1.11653e-13	0	RXN8001Chloroplast	0	0	0	-1.24361e-13	0	RXN8001Chloroplast	0	0	0	5.43499e-06	[0 +]	RXN8001Chloroplast	0	0	0	-1.446e-13	0
RXN821mod	2.11832e-24	0	0	1000	[0 +1000]	RXN821mod	0	-3.11258e-15	0	1000	[0 +1000]	RXN821mod	0	0	0	1000	[0 +1000]	RXN821mod	0	0	0	1000	[0 +1000]	RXN821mod	5.3382	0	0	1000	[0 +1000]	RXN821mod	0	0	0	1000	[0 +1000]
RXN8287	0	0	0	0	0	RXN8287	0	0	0	7.92328	[0 +]	RXN8287	2.48394e-26	0	0	0	0	RXN8287	0	0	0	1.07182e-11	0	RXN8287	0	0	0	2.97488	[0 +]	RXN8287	0	0	0	0	0
RXN8389mod	0	0	0	0	0	RXN8389mod	0	0	0	0	0	RXN8389mod	0	0	0	0	0	RXN8389mod	0	0	0	0	0	RXN8389mod	0	0	0	0	0	RXN8389mod	0	0	0	0	0
RXN8730	0	0	0	0	0	RXN8730	0	0	0	15.8466	[0 +]	RXN8730	0	0	0	0	0	RXN8730	0	0	0	1.83405e-11	0	RXN8730	0	0	0	5.94975	[0 +]	RXN8730	0	0	0	8.39917e-12	0
RXN9514	-2.91177e-26	-3.39461e-33	0	0	0	RXN9514	1.80756	1.80756	1.80756	1.80757	[+ +]	RXN9514	1.80756	1.80756	1.80756	1.80756	+	RXN9514	-1.28107e-31	0	0	0	0	RXN9514	1.83233	1.83233	1.83233	1.83234	[+ +]	RXN9514	1.83233	1.83233	1.83233	1.83233	+
RXN9516	-2.90815e-26	-3.39461e-33	0	0	0	RXN9516	1.80756	1.80756	1.80756	1.80757	[+ +]	RXN9516	1.80756	1.80756	1.80756	1.80756	+	RXN9516	-1.28107e-31	0	0	0	0	RXN9516	1.83233	1.83233	1.83233	1.83234	[+ +]	RXN9516	1.83233	1.83233	1.83233	1.83233	+
RXN9518	-2.90815e-26	-3.39461e-33	0	0	0	RXN9518	1.80756	1.80756	1.80756	1.80757	[+ +]	RXN9518	1.80756	1.80756	1.80756	1.80756	+	RXN9518	-1.28107e-31	0	0	0	0	RXN9518	1.83233	1.83233	1.83233	1.83234	[+ +]	RXN9518	1.83233	1.83233	1.83233	1.83233	+
RXN9520	-2.90928e-26	-3.39461e-33	-1.547e-25	6.60321e-14	0	RXN9520	1.80756	1.80756	1.80756	1.80757	[+ +]	RXN9520	1.80756	1.80756	1.80756	1.80756	+	RXN9520	-1.28107e-31	0	-3.05906e-27	-4.34249e-15	0	RXN9520	1.83233	1.83233	1.83233	1.83234	[+ +]	RXN9520	1.83233	1.83233	1.83233	1.83233	+
RXN9523	-2.91539e-26	-3.39461e-33	0	0	0	RXN9523	1.80756	1.80756	1.80756	1.80757	[+ +]	RXN9523	1.80756	1.80756	1.80756	1.80756	+	RXN9523	-1.28107e-31	0	0	0	0	RXN9523	1.83233	1.83233	1.83233	1.83234	[+ +]	RXN9523	1.83233	1.83233	1.83233	1.83233	+
RXN9524	-2.90815e-26	-3.39461e-33	0	0	0	RXN9524	1.80756	1.80756	1.80756	1.80757	[+ +]	RXN9524	1.80756	1.80756	1.80756	1.80756	+	RXN9524	-1.28107e-31	0	0	0	0	RXN9524	1.83233	1.83233	1.83233	1.83234	[+ +]	RXN9524	1.83233	1.83233	1.83233	1.83233	+
RXN9527	-2.90815e-26	-3.39461e-33	0	0	0	RXN9527	1.80756	1.80756	1.80756	1.80757	[+ +]	RXN9527	1.80756	1.80756	1.80756	1.80756	+	RXN9527	-1.28107e-31	0	0	0	0	RXN9527	1.83233	1.83233	1.83233	1.83234	[+ +]	RXN9527	1.83233	1.83233	1.83233	1.83233	+
RXN9528	-2.90454e-26	-3.39461e-33	0	0	0	RXN9528	1.80756	1.80756	1.80756	1.80757	[+ +]	RXN9528	1.80756	1.80756	1.80756	1.80756	+	RXN9528	-1.28107e-31	0	0	0	0	RXN9528	1.83233	1.83233	1.83233	1.83234	[+ +]	RXN9528	1.83233	1.83233	1.83233	1.83233	+
RXN9531	-2.90815e-26	-3.39461e-33	0	0	0	RXN9531	1.80756	1.80756	1.80756	1.80757	[+ +]	RXN9531	1.80756	1.80756	1.80756	1.80756	+	RXN9531	-1.28107e-31	0	0	0	0	RXN9531	1.83233	1.83233	1.83233	1.83234	[+ +]	RXN9531	1.83233	1.83233	1.83233	1.83233	+
RXN9532	-2.90454e-26	-3.39461e-33	0	0	0	RXN9532	1.80756	1.80756	1.80756	1.80757	[+ +]	RXN9532	1.80756	1.80756	1.80756	1.80756	+	RXN9532	-1.28107e-31	0	0	0	0	RXN9532	1.83233	1.83233	1.83233	1.83234	[+ +]	RXN9532	1.83233	1.83233	1.83233	1.83233	+
RXN9533	-2.90543e-26	-3.39461e-33	0	0	0	RXN9533	1.80756	1.80756	1.80756	1.80757	[+ +]	RXN9533	1.80756	1.80756	1.80756	1.80756	+	RXN9533	-1.28107e-31	0	0	0	0	RXN9533	1.83233	1.83233	1.83233	1.83234	[+ +]	RXN9533	1.83233	1.83233	1.83233	1.83233	+
RXN9535	-2.90815e-26	-3.39461e-33	0	0	0	RXN9535	1.80756	1.80756	1.80756	1.80757	[+ +]	RXN9535	1.80756	1.80756	1.80756	1.80756	+	RXN9535	-1.28107e-31	0	0	0	0	RXN9535	1.83233	1.83233	1.83233	1.83234	[+ +]	RXN9535	1.83233	1.83233	1.83233	1.83233	+
RXN9536	-3.20837e-26	-3.39461e-33	0	0	0	RXN9536	1.80756	1.80756	1.80756	1.80757	[+ +]	RXN9536	1.80756	1.80756	1.80756	1.80756	+	RXN9536	-1.28107e-31	0	0	0	0	RXN9536	1.83233	1.83233	1.83233	1.83234	[+ +]	RXN9536	1.83233	1.83233	1.83233	1.83233	+
RXN9537	-3.20945e-26	-3.39461e-33	-1.55931e-25	6.60321e-14	0	RXN9537	1.80756	1.80756	1.80756	1.80757	[+ +]	RXN9537	1.80756	1.80756	1.80756	1.80756	+	RXN9537	-1.28107e-31	0	-3.05891e-27	-4.34249e-15	0	RXN9537	1.83233	1.83233	1.83233	1.83234	[+ +]	RXN9537	1.83233	1.83233	1.83233	1.83233	+
RXN9539	-3.20837e-26	-3.39461e-33	0	0	0	RXN9539	1.80756	1.80756	1.80756	1.80757	[+ +]	RXN9539	1.80756	1.80756	1.80756	1.80756	+	RXN9539	-1.28107e-31	0	0	0	0	RXN9539	1.83233	1.83233	1.83233	1.83234	[+ +]	RXN9539	1.83233	1.83233	1.83233	1.83233	+
RXN9540	-3.20837e-26	-3.39461e-33	0	0	0	RXN9540	1.80756	1.80756	1.80756	1.80757	[+ +]	RXN9540	1.80756	1.80756	1.80756	1.80756	+	RXN9540	1.02486e-30	0	0	0	0	RXN9540	1.83233	1.83233	1.83233	1.83234	[+ +]	RXN9540	1.83233	1.83233	1.83233	1.83233	+
RXN9548	0	-3.39461e-33	0	0	0	RXN9548	0	0	0	4.28524e-06	[0 +]	RXN9548	0	-5.24095e-31	0	4.83956e-14	0	RXN9548	-1.28107e-31	0	0	5.9654e-14	0	RXN9548	0	0	0	6.69268e-06	[0 +]	RXN9548	0	0	0	1.89309e-13	0
RXN9549	-2.49529e-26	0	0	0	0	RXN9549	0.241009	0.241009	0.241008	0.241013	[+ +]	RXN9549	0.241009	0.241009	0.241009	0.241009	+	RXN9549	3.18756e-47	0	0	0	0	RXN9549	0.244311	0.244311	0.244311	0.244318	[+ +]	RXN9549	0.244311	0.244311	0.244311	0.244311	+
RXN9550	0	0	0	0	0	RXN9550	0	0	0	0	0	RXN9550	0	0	0	0	0	RXN9550	0	0	0	0	0	RXN9550	0	0	0	0	0	RXN9550	0	0	0	0	0
RXN9588	0	0	0	0	0	RXN9588	0	0	0	0	0	RXN9588	0	0	0	0	0	RXN9588	0	0	0	0	0	RXN9588	0	0	0	0	0	RXN9588	0	0	0	0	0
RXN961chloroplast	0	0	0	0	0#	RXN961chloroplast	0	0	0	0	0#	RXN961chloroplast	0	0	0	0	0#	RXN961chloroplast	20	20	20	20	+	RXN961chloroplast	20.229	20.229	20.2289	20.229	[+ +]	RXN961chloroplast	20.229	20.229	20.229	20.229	+
RXN9633	-4.25952e-27	-3.39461e-33	0	0	0	RXN9633	1.56656	1.56656	1.56655	1.56656	[+ +]	RXN9633	1.56656	1.56656	1.56656	1.56656	+	RXN9633	1.02486e-30	0	0	5.9654e-14	0	RXN9633	1.58802	1.58802	1.58802	1.58803	[+ +]	RXN9633	1.58802	1.58802	1.58802	1.58802	+
RXN9634	-4.25952e-27	-3.39461e-33	-1.10064e-27	4.24233e-14	0	RXN9634	1.56656	1.56656	1.56655	1.56656	[+ +]	RXN9634	1.56656	1.56656	1.56656	1.56656	+	RXN9634	1.02486e-30	0	4.08913e-26	5.9654e-14	0	RXN9634	1.58802	1.58802	1.58802	1.58803	[+ +]	RXN9634	1.58802	1.58802	1.58802	1.58802	+
RXN9635	-4.25952e-27	-3.39461e-33	0	0	0	RXN9635	1.56656	1.56656	1.56655	1.56656	[+ +]	RXN9635	1.56656	1.56656	1.56656	1.56656	+	RXN9635	1.02486e-30	0	0	5.9654e-14	0	RXN9635	1.58802	1.58802	1.58802	1.58803	[+ +]	RXN9635	1.58802	1.58802	1.58802	1.58802	+
RXN9655	-2.90543e-26	-3.39461e-33	0	0	0	RXN9655	1.80756	1.80756	1.80756	1.80757	[+ +]	RXN9655	1.80756	1.80756	1.80756	1.80756	+	RXN9655	-1.28107e-31	0	0	0	0	RXN9655	1.83233	1.83233	1.83233	1.83234	[+ +]	RXN9655	1.83233	1.83233	1.83233	1.83233	+
RXN9657	-2.90993e-26	-3.39461e-33	0	0	0	RXN9657	1.80756	1.80756	1.80756	1.80757	[+ +]	RXN9657	1.80756	1.80756	1.80756	1.80756	+	RXN9657	-1.28107e-31	0	0	0	0	RXN9657	1.83233	1.83233	1.83233	1.83234	[+ +]	RXN9657	1.83233	1.83233	1.83233	1.83233	+
RXN9658	-2.90993e-26	-3.39461e-33	0	0	0	RXN9658	1.80756	1.80756	1.80756	1.80757	[+ +]	RXN9658	1.80756	1.80756	1.80756	1.80756	+	RXN9658	-1.28107e-31	0	0	0	0	RXN9658	1.83233	1.83233	1.83233	1.83234	[+ +]	RXN9658	1.83233	1.83233	1.83233	1.83233	+
RXN9659	-2.90993e-26	-3.39461e-33	0	0	0	RXN9659	1.80756	1.80756	1.80756	1.80757	[+ +]	RXN9659	1.80756	1.80756	1.80756	1.80756	+	RXN9659	-1.28107e-31	0	0	0	0	RXN9659	1.83233	1.83233	1.83233	1.83234	[+ +]	RXN9659	1.83233	1.83233	1.83233	1.83233	+
RXN9660	-2.90542e-26	-3.39461e-33	0	0	0	RXN9660	1.80756	1.80756	1.80756	1.80757	[+ +]	RXN9660	1.80756	1.80756	1.80756	1.80756	+	RXN9660	-1.28107e-31	0	0	0	0	RXN9660	1.83233	1.83233	1.83233	1.83234	[+ +]	RXN9660	1.83233	1.83233	1.83233	1.83233	+
RXN9661	-2.90542e-26	-3.39461e-33	0	0	0	RXN9661	1.80756	1.80756	1.80756	1.80757	[+ +]	RXN9661	1.80756	1.80756	1.80756	1.80756	+	RXN9661	-1.28107e-31	0	0	0	0	RXN9661	1.83233	1.83233	1.83233	1.83234	[+ +]	RXN9661	1.83233	1.83233	1.83233	1.83233	+
RXN9662	-3.20816e-26	-3.39461e-33	0	0	0	RXN9662	1.80756	1.80756	1.80756	1.80757	[+ +]	RXN9662	1.80756	1.80756	1.80756	1.80756	+	RXN9662	-1.28107e-31	0	0	0	0	RXN9662	1.83233	1.83233	1.83233	1.83234	[+ +]	RXN9662	1.83233	1.83233	1.83233	1.83233	+
RXN9663	-3.20816e-26	-3.39461e-33	0	0	0	RXN9663	1.80756	1.80756	1.80756	1.80757	[+ +]	RXN9663	1.80756	1.80756	1.80756	1.80756	+	RXN9663	1.02486e-30	0	0	0	0	RXN9663	1.83233	1.83233	1.83233	1.83234	[+ +]	RXN9663	1.83233	1.83233	1.83233	1.83233	+
RXN969peroxisome	0	0	0	0	0	RXN969peroxisome	0	0	0	0	0	RXN969peroxisome	0	0	0	0	0	RXN969peroxisome	20	20	20	20	+	RXN969peroxisome	20.229	20.229	20.2289	20.229	[+ +]	RXN969peroxisome	20.229	20.229	20.229	20.229	+
RXN9952	0	0	0	0	0	RXN9952	0	0	0	0	0	RXN9952	0	0	0	0	0	RXN9952	0	0	0	0	0	RXN9952	0	0	0	0	0	RXN9952	0	0	0	0	0
RXN9952Chloroplast	0	0	0	0	0	RXN9952Chloroplast	0	0	0	5.28219	[0 +]	RXN9952Chloroplast	0	0	0	0	0	RXN9952Chloroplast	0	0	0	1.69955e-12	0	RXN9952Chloroplast	0	0	0	0.000134969	[0 +]	RXN9952Chloroplast	0	0	0	2.87488e-12	0
RXNMGPROTOPORPHYRINMETHYLESTERSYN	0	0	0	0	0	RXNMGPROTOPORPHYRINMETHYLESTERSYN	0	0	0	0	0	RXNMGPROTOPORPHYRINMETHYLESTERSYN	0	0	0	0	0	RXNMGPROTOPORPHYRINMETHYLESTERSYN	0	0	0	0	0	RXNMGPROTOPORPHYRINMETHYLESTERSYN	0	0	0	0	0	RXNMGPROTOPORPHYRINMETHYLESTERSYN	0	0	0	0	0
RXNQT4141	0	0	0	0	0	RXNQT4141	0	0	0	0	0	RXNQT4141	0	0	0	0	0	RXNQT4141	0	0	0	0	0	RXNQT4141	0	0	0	0	0	RXNQT4141	0	0	0	0	0
RXNQT4142	0	0	0	0	0	RXNQT4142	0	0	0	0	0	RXNQT4142	0	0	0	0	0	RXNQT4142	0	0	0	0	0	RXNQT4142	0	0	0	0	0	RXNQT4142	0	0	0	0	0
SADENMETSYNRXN	5.70144e-14	0	0	0	0	SADENMETSYNRXN	2.1308e-16	9.79637e-15	0	2.81924e-06	[0 +]	SADENMETSYNRXN	4.40953e-14	0	0	6.60558e-14	0	SADENMETSYNRXN	0	0	0	0	0	SADENMETSYNRXN	0	0	0	6.63782e-06	[0 +]	SADENMETSYNRXN	0	0	0	2.10537e-13	0
SAICARSYNRXNChloroplast	0	0	0	0	0	SAICARSYNRXNChloroplast	0	0	0	0	0	SAICARSYNRXNChloroplast	0	0	0	0	0	SAICARSYNRXNChloroplast	0	0	0	0	0	SAICARSYNRXNChloroplast	0	0	0	0	0	SAICARSYNRXNChloroplast	0	0	0	0	0
SEDOBISALDOLRXNchloroplast	33.3333	16.6667	0	33.3333	[0 +]	SEDOBISALDOLRXNchloroplast	33.2592	16.6296	0	49.1057	[0 +]	SEDOBISALDOLRXNchloroplast	33.2592	16.6296	0	33.2592	[0 +]	SEDOBISALDOLRXNchloroplast	53.3333	26.6667	0	53.3333	[0 +]	SEDOBISALDOLRXNchloroplast	53.9439	26.9719	0	59.8936	[0 +]	SEDOBISALDOLRXNchloroplast	53.9439	26.9719	0	53.9439	[0 +]
SEDOHEPTULOSEBISPHOSPHATASERXNchloroplast	33.3333	16.6667	0	33.3333	[0 +]	SEDOHEPTULOSEBISPHOSPHATASERXNchloroplast	33.2592	16.6296	0	49.1057	[0 +]	SEDOHEPTULOSEBISPHOSPHATASERXNchloroplast	33.2592	16.6296	0	33.2592	[0 +]	SEDOHEPTULOSEBISPHOSPHATASERXNchloroplast	53.3333	26.6667	0	53.3333	[0 +]	SEDOHEPTULOSEBISPHOSPHATASERXNchloroplast	53.9439	26.9719	0	59.8936	[0 +]	SEDOHEPTULOSEBISPHOSPHATASERXNchloroplast	53.9439	26.9719	0	53.9439	[0 +]
SERINECPALMITOYLTRANSFERASERXN	0	0	0	0	0	SERINECPALMITOYLTRANSFERASERXN	0	0	0	0	0	SERINECPALMITOYLTRANSFERASERXN	0	0	0	0	0	SERINECPALMITOYLTRANSFERASERXN	0	0	0	0	0	SERINECPALMITOYLTRANSFERASERXN	0	0	0	0	0	SERINECPALMITOYLTRANSFERASERXN	0	0	0	0	0
SERINEGLYOXYLATEAMINOTRANSFERASERXNperoxisome	0	5.12637e-32	0	0	0	SERINEGLYOXYLATEAMINOTRANSFERASERXNperoxisome	0	0	0	2.85683e-05	[0 +]	SERINEGLYOXYLATEAMINOTRANSFERASERXNperoxisome	0	0	0	5.95506e-13	0	SERINEGLYOXYLATEAMINOTRANSFERASERXNperoxisome	10	10	10	10	+	SERINEGLYOXYLATEAMINOTRANSFERASERXNperoxisome	10.1145	5.99784	4.16472	16.0642	[+ +]	SERINEGLYOXYLATEAMINOTRANSFERASERXNperoxisome	10.1145	10.1145	10.1145	10.1145	+
SERINEOACETTRANRXNChloroplast	0	0	0	1.40945e-13	0	SERINEOACETTRANRXNChloroplast	0	0	0	2.81924e-06	[0 +]	SERINEOACETTRANRXNChloroplast	0	0	0	1.45492e-13	0	SERINEOACETTRANRXNChloroplast	0	0	0	-1.07867e-13	0	SERINEOACETTRANRXNChloroplast	0	0	0	6.63782e-06	[0 +]	SERINEOACETTRANRXNChloroplast	0	0	0	-1.73969e-13	0
Shikimate5DehydrogenaseRxnChloroplast	0	0	0	0	0	Shikimate5DehydrogenaseRxnChloroplast	0	8.0202e-15	0	2.32894e-06	[0 +]	Shikimate5DehydrogenaseRxnChloroplast	0	0	0	5.91599e-14	0	Shikimate5DehydrogenaseRxnChloroplast	0	0	0	1.54959e-14	0	Shikimate5DehydrogenaseRxnChloroplast	0	0	0	4.62751e-06	[0 +]	Shikimate5DehydrogenaseRxnChloroplast	0	0	0	1.10139e-13	0
ShikimateKinaseRxnChloroplast	0	0	0	0	0	ShikimateKinaseRxnChloroplast	0	8.0202e-15	0	2.32894e-06	[0 +]	ShikimateKinaseRxnChloroplast	0	0	0	5.91599e-14	0	ShikimateKinaseRxnChloroplast	0	0	0	1.54959e-14	0	ShikimateKinaseRxnChloroplast	0	0	0	4.62751e-06	[0 +]	ShikimateKinaseRxnChloroplast	0	0	0	1.10139e-13	0
Sink13betaDglucanmonomerequivalent	0	0	0	0	0#	Sink13betaDglucanmonomerequivalent	0	0	0	0	0#	Sink13betaDglucanmonomerequivalent	0	0	0	0	0#	Sink13betaDglucanmonomerequivalent	0	0	0	0	0#	Sink13betaDglucanmonomerequivalent	0	0	0	0	0#	Sink13betaDglucanmonomerequivalent	0	0	0	0	0#
Sink14alphaDGlucanmonomerequivalentchloroplast	0	0	0	0	0#	Sink14alphaDGlucanmonomerequivalentchloroplast	0	0	0	0	0#	Sink14alphaDGlucanmonomerequivalentchloroplast	0	0	0	0	0#	Sink14alphaDGlucanmonomerequivalentchloroplast	0	0	0	0	0#	Sink14alphaDGlucanmonomerequivalentchloroplast	0	0	0	0	0#	Sink14alphaDGlucanmonomerequivalentchloroplast	0	0	0	0	0#
Sink14betaDxylanmonomerequivalent	0	0	0	0	0#	Sink14betaDxylanmonomerequivalent	0	0	0	0	0#	Sink14betaDxylanmonomerequivalent	0	0	0	0	0#	Sink14betaDxylanmonomerequivalent	0	0	0	0	0#	Sink14betaDxylanmonomerequivalent	0	0	0	0	0#	Sink14betaDxylanmonomerequivalent	0	0	0	0	0#
Sinkamylopectinmonomerequivalentchloroplast	0	0	0	0	0#	Sinkamylopectinmonomerequivalentchloroplast	0	0	0	0	0#	Sinkamylopectinmonomerequivalentchloroplast	0	0	0	0	0#	Sinkamylopectinmonomerequivalentchloroplast	0	0	0	0	0#	Sinkamylopectinmonomerequivalentchloroplast	0	0	0	0	0#	Sinkamylopectinmonomerequivalentchloroplast	0	0	0	0	0#
SinkArabinoxylanmonomerequivalent	0	0	0	0	0#	SinkArabinoxylanmonomerequivalent	0	0	0	0	0#	SinkArabinoxylanmonomerequivalent	0	0	0	0	0#	SinkArabinoxylanmonomerequivalent	0	0	0	0	0#	SinkArabinoxylanmonomerequivalent	0	0	0	0	0#	SinkArabinoxylanmonomerequivalent	0	0	0	0	0#
SinkARG	0	0	0	0	0#	SinkARG	0	0	0	0	0#	SinkARG	0	0	0	0	0#	SinkARG	0	0	0	0	0#	SinkARG	0	0	0	0	0#	SinkARG	0	0	0	0	0#
SinkASCORBATE	0	0	0	0	0#	SinkASCORBATE	0	0	0	0	0#	SinkASCORBATE	0	0	0	0	0#	SinkASCORBATE	0	0	0	0	0#	SinkASCORBATE	0	0	0	0	0#	SinkASCORBATE	0	0	0	0	0#
SinkASN	0	0	0	0	0#	SinkASN	0	0	0	0	0#	SinkASN	0	0	0	0	0#	SinkASN	0	0	0	0	0#	SinkASN	0	0	0	0	0#	SinkASN	0	0	0	0	0#
SinkCELLULOSEmonomerequivalent	0	0	0	0	0#	SinkCELLULOSEmonomerequivalent	0	0	0	0	0#	SinkCELLULOSEmonomerequivalent	0	0	0	0	0#	SinkCELLULOSEmonomerequivalent	0	0	0	0	0#	SinkCELLULOSEmonomerequivalent	0	0	0	0	0#	SinkCELLULOSEmonomerequivalent	0	0	0	0	0#
SinkCHLOROPHYLLA	0	0	0	0	0#	SinkCHLOROPHYLLA	0	0	0	0	0#	SinkCHLOROPHYLLA	0	0	0	0	0#	SinkCHLOROPHYLLA	0	0	0	0	0#	SinkCHLOROPHYLLA	0	0	0	0	0#	SinkCHLOROPHYLLA	0	0	0	0	0#
SinkCHLOROPHYLLB	0	0	0	0	0#	SinkCHLOROPHYLLB	0	0	0	0	0#	SinkCHLOROPHYLLB	0	0	0	0	0#	SinkCHLOROPHYLLB	0	0	0	0	0#	SinkCHLOROPHYLLB	0	0	0	0	0#	SinkCHLOROPHYLLB	0	0	0	0	0#
SinkCONIFERYLALCOHOL	0	0	0	0	0#	SinkCONIFERYLALCOHOL	0	0	0	0	0#	SinkCONIFERYLALCOHOL	0	0	0	0	0#	SinkCONIFERYLALCOHOL	0	0	0	0	0#	SinkCONIFERYLALCOHOL	0	0	0	0	0#	SinkCONIFERYLALCOHOL	0	0	0	0	0#
SinkCOUMARYLALCOHOL	0	0	0	0	0#	SinkCOUMARYLALCOHOL	0	0	0	0	0#	SinkCOUMARYLALCOHOL	0	0	0	0	0#	SinkCOUMARYLALCOHOL	0	0	0	0	0#	SinkCOUMARYLALCOHOL	0	0	0	0	0#	SinkCOUMARYLALCOHOL	0	0	0	0	0#
SinkCPD13612	0	0	0	0	0#	SinkCPD13612	0	0	0	0	0#	SinkCPD13612	0	0	0	0	0#	SinkCPD13612	0	0	0	0	0#	SinkCPD13612	0	0	0	0	0#	SinkCPD13612	0	0	0	0	0#
SinkCPD440	0	0	0	0	0#	SinkCPD440	0	0	0	0	0#	SinkCPD440	0	0	0	0	0#	SinkCPD440	0	0	0	0	0#	SinkCPD440	0	0	0	0	0#	SinkCPD440	0	0	0	0	0#
SinkCPD649	0	0	0	0	0#	SinkCPD649	0	0	0	0	0#	SinkCPD649	0	0	0	0	0#	SinkCPD649	0	0	0	0	0#	SinkCPD649	0	0	0	0	0#	SinkCPD649	0	0	0	0	0#
SinkCYS	0	0	0	0	0#	SinkCYS	0	0	0	0	0#	SinkCYS	0	0	0	0	0#	SinkCYS	0	0	0	0	0#	SinkCYS	0	0	0	0	0#	SinkCYS	0	0	0	0	0#
SinkDGalactosyl12diacylglycerols	0	0	0	0	0#	SinkDGalactosyl12diacylglycerols	0	0	0	0	0#	SinkDGalactosyl12diacylglycerols	0	0	0	0	0#	SinkDGalactosyl12diacylglycerols	0	0	0	0	0#	SinkDGalactosyl12diacylglycerols	0	0	0	0	0#	SinkDGalactosyl12diacylglycerols	0	0	0	0	0#
SinkDNAbaseequivalent	0	0	0	0	0#	SinkDNAbaseequivalent	0	0	0	0	0#	SinkDNAbaseequivalent	0	0	0	0	0#	SinkDNAbaseequivalent	0	0	0	0	0#	SinkDNAbaseequivalent	0	0	0	0	0#	SinkDNAbaseequivalent	0	0	0	0	0#
SinkGalactosylgalactosyldiacylglycerols	0	0	0	0	0#	SinkGalactosylgalactosyldiacylglycerols	0	0	0	0	0#	SinkGalactosylgalactosyldiacylglycerols	0	0	0	0	0#	SinkGalactosylgalactosyldiacylglycerols	0	0	0	0	0#	SinkGalactosylgalactosyldiacylglycerols	0	0	0	0	0#	SinkGalactosylgalactosyldiacylglycerols	0	0	0	0	0#
SinkGLN	0	0	0	0	0#	SinkGLN	0	0	0	0	0#	SinkGLN	0	0	0	0	0#	SinkGLN	0	0	0	0	0#	SinkGLN	0	0	0	0	0#	SinkGLN	0	0	0	0	0#
SinkGLU	0	0	0	0	0#	SinkGLU	0	0	0	0	0#	SinkGLU	0	0	0	0	0#	SinkGLU	0	0	0	0	0#	SinkGLU	0	0	0	0	0#	SinkGLU	0	0	0	0	0#
SinkGlucomannanmonomerequivalent	0	0	0	0	0#	SinkGlucomannanmonomerequivalent	0	0	0	0	0#	SinkGlucomannanmonomerequivalent	0	0	0	0	0#	SinkGlucomannanmonomerequivalent	0	0	0	0	0#	SinkGlucomannanmonomerequivalent	0	0	0	0	0#	SinkGlucomannanmonomerequivalent	0	0	0	0	0#
SinkGlucuronoxylanmonomerequivalent	0	0	0	0	0#	SinkGlucuronoxylanmonomerequivalent	0	0	0	0	0#	SinkGlucuronoxylanmonomerequivalent	0	0	0	0	0#	SinkGlucuronoxylanmonomerequivalent	0	0	0	0	0#	SinkGlucuronoxylanmonomerequivalent	0	0	0	0	0#	SinkGlucuronoxylanmonomerequivalent	0	0	0	0	0#
SinkGLY	0	0	0	0	0#	SinkGLY	0	0	0	0	0#	SinkGLY	0	0	0	0	0#	SinkGLY	0	0	0	0	0#	SinkGLY	0	0	0	0	0#	SinkGLY	0	0	0	0	0#
SinkHIS	0	0	0	0	0#	SinkHIS	0	0	0	0	0#	SinkHIS	0	0	0	0	0#	SinkHIS	0	0	0	0	0#	SinkHIS	0	0	0	0	0#	SinkHIS	0	0	0	0	0#
SinkHomogalacturonanmonomerequivalent	0	0	0	0	0#	SinkHomogalacturonanmonomerequivalent	0	0	0	0	0#	SinkHomogalacturonanmonomerequivalent	0	0	0	0	0#	SinkHomogalacturonanmonomerequivalent	0	0	0	0	0#	SinkHomogalacturonanmonomerequivalent	0	0	0	0	0#	SinkHomogalacturonanmonomerequivalent	0	0	0	0	0#
SinkILE	0	0	0	0	0#	SinkILE	0	0	0	0	0#	SinkILE	0	0	0	0	0#	SinkILE	0	0	0	0	0#	SinkILE	0	0	0	0	0#	SinkILE	0	0	0	0	0#
SinkL1PHOSPHATIDYLGLYCEROL	0	0	0	0	0	SinkL1PHOSPHATIDYLGLYCEROL	0	0	0	0	0	SinkL1PHOSPHATIDYLGLYCEROL	0	0	0	0	0	SinkL1PHOSPHATIDYLGLYCEROL	0	0	0	0	0	SinkL1PHOSPHATIDYLGLYCEROL	0	0	0	0	0	SinkL1PHOSPHATIDYLGLYCEROL	0	0	0	0	0
SinkL1phosphatidylinositols	0	0	0	0	0	SinkL1phosphatidylinositols	0	0	0	0	0	SinkL1phosphatidylinositols	0	0	0	0	0	SinkL1phosphatidylinositols	0	0	0	0	0	SinkL1phosphatidylinositols	0	0	0	0	0	SinkL1phosphatidylinositols	0	0	0	0	0
SinkLALPHAALANINE	0	0	0	0	0#	SinkLALPHAALANINE	0	0	0	0	0#	SinkLALPHAALANINE	0	0	0	0	0#	SinkLALPHAALANINE	0	0	0	0	0#	SinkLALPHAALANINE	0	0	0	0	0#	SinkLALPHAALANINE	0	0	0	0	0#
SinkLASPARTATE	0	0	0	0	0#	SinkLASPARTATE	0	0	0	0	0#	SinkLASPARTATE	0	0	0	0	0#	SinkLASPARTATE	0	0	0	0	0#	SinkLASPARTATE	0	0	0	0	0#	SinkLASPARTATE	0	0	0	0	0#
SinkLEU	0	0	0	0	0#	SinkLEU	0	0	0	0	0#	SinkLEU	0	0	0	0	0#	SinkLEU	0	0	0	0	0#	SinkLEU	0	0	0	0	0#	SinkLEU	0	0	0	0	0#
SinkLYS	0	0	0	0	0#	SinkLYS	0	0	0	0	0#	SinkLYS	0	0	0	0	0#	SinkLYS	0	0	0	0	0#	SinkLYS	0	0	0	0	0#	SinkLYS	0	0	0	0	0#
SinkMET	0	0	0	0	0#	SinkMET	0	0	0	0	0#	SinkMET	0	0	0	0	0#	SinkMET	0	0	0	0	0#	SinkMET	0	0	0	0	0#	SinkMET	0	0	0	0	0#
SinkPHE	0	0	0	0	0#	SinkPHE	0	0	0	0	0#	SinkPHE	0	0	0	0	0#	SinkPHE	0	0	0	0	0#	SinkPHE	0	0	0	0	0#	SinkPHE	0	0	0	0	0#
SinkPHYTOSPINGOSINE	0	0	0	0	0#	SinkPHYTOSPINGOSINE	0	0	0	0	0#	SinkPHYTOSPINGOSINE	0	0	0	0	0#	SinkPHYTOSPINGOSINE	0	0	0	0	0#	SinkPHYTOSPINGOSINE	0	0	0	0	0#	SinkPHYTOSPINGOSINE	0	0	0	0	0#
SinkPRO	0	0	0	0	0#	SinkPRO	0	0	0	0	0#	SinkPRO	0	0	0	0	0#	SinkPRO	0	0	0	0	0#	SinkPRO	0	0	0	0	0#	SinkPRO	0	0	0	0	0#
SinkRNAbaseequivalent	0	0	0	0	0#	SinkRNAbaseequivalent	0	0	0	0	0#	SinkRNAbaseequivalent	0	0	0	0	0#	SinkRNAbaseequivalent	0	0	0	0	0#	SinkRNAbaseequivalent	0	0	0	0	0#	SinkRNAbaseequivalent	0	0	0	0	0#
SinkSER	0	0	0	0	0#	SinkSER	0	0	0	0	0#	SinkSER	0	0	0	0	0#	SinkSER	0	0	0	0	0#	SinkSER	0	0	0	0	0#	SinkSER	0	0	0	0	0#
SinkSINAPYLALCOHOL	0	0	0	0	0#	SinkSINAPYLALCOHOL	0	0	0	0	0#	SinkSINAPYLALCOHOL	0	0	0	0	0#	SinkSINAPYLALCOHOL	0	0	0	0	0#	SinkSINAPYLALCOHOL	0	0	0	0	0#	SinkSINAPYLALCOHOL	0	0	0	0	0#
SinkSUCROSE	0	0	0	0	0#	SinkSUCROSE	0	0	0	0	0#	SinkSUCROSE	0	0	0	0	0#	SinkSUCROSE	0	0	0	0	0#	SinkSUCROSE	0	0	0	0	0#	SinkSUCROSE	0	0	0	0	0#
SinkSULFOQUINOVOSYLDIACYLGLYCEROL	0	0	0	0	0#	SinkSULFOQUINOVOSYLDIACYLGLYCEROL	0	0	0	0	0#	SinkSULFOQUINOVOSYLDIACYLGLYCEROL	0	0	0	0	0#	SinkSULFOQUINOVOSYLDIACYLGLYCEROL	0	0	0	0	0#	SinkSULFOQUINOVOSYLDIACYLGLYCEROL	0	0	0	0	0#	SinkSULFOQUINOVOSYLDIACYLGLYCEROL	0	0	0	0	0#
SinkTHR	0	0	0	0	0#	SinkTHR	0	0	0	0	0#	SinkTHR	0	0	0	0	0#	SinkTHR	0	0	0	0	0#	SinkTHR	0	0	0	0	0#	SinkTHR	0	0	0	0	0#
SinkTRP	0	0	0	0	0#	SinkTRP	0	0	0	0	0#	SinkTRP	0	0	0	0	0#	SinkTRP	0	0	0	0	0#	SinkTRP	0	0	0	0	0#	SinkTRP	0	0	0	0	0#
SinkTYR	0	0	0	0	0#	SinkTYR	0	0	0	0	0#	SinkTYR	0	0	0	0	0#	SinkTYR	0	0	0	0	0#	SinkTYR	0	0	0	0	0#	SinkTYR	0	0	0	0	0#
SinkVAL	0	0	0	0	0#	SinkVAL	0	0	0	0	0#	SinkVAL	0	0	0	0	0#	SinkVAL	0	0	0	0	0#	SinkVAL	0	0	0	0	0#	SinkVAL	0	0	0	0	0#
SinkXylogalacturonanmonomerequivalent	0	0	0	0	0#	SinkXylogalacturonanmonomerequivalent	0	0	0	0	0#	SinkXylogalacturonanmonomerequivalent	0	0	0	0	0#	SinkXylogalacturonanmonomerequivalent	0	0	0	0	0#	SinkXylogalacturonanmonomerequivalent	0	0	0	0	0#	SinkXylogalacturonanmonomerequivalent	0	0	0	0	0#
SinkXyloglucanmonomerequivalent	0	0	0	0	0#	SinkXyloglucanmonomerequivalent	0	0	0	0	0#	SinkXyloglucanmonomerequivalent	0	0	0	0	0#	SinkXyloglucanmonomerequivalent	0	0	0	0	0#	SinkXyloglucanmonomerequivalent	0	0	0	0	0#	SinkXyloglucanmonomerequivalent	0	0	0	0	0#
SolubleSugarSink	0	0	0	0	0	SolubleSugarSink	0	3.84544e-12	0	0.000116705	[0 +]	SolubleSugarSink	0	0	0	0	0	SolubleSugarSink	0	0	0	0	0	SolubleSugarSink	0	0	0	0.000213052	[0 +]	SolubleSugarSink	0	0	0	2.99313e-14	0
SPHINGANINEKINASERXN	0	0	0	0	0	SPHINGANINEKINASERXN	0	0	0	0	0	SPHINGANINEKINASERXN	0	0	0	0	0	SPHINGANINEKINASERXN	0	0	0	0	0	SPHINGANINEKINASERXN	0	0	0	0	0	SPHINGANINEKINASERXN	0	0	0	0	0
SPONTPRORXN	-8.87259e-26	-1.04465e-32	5.36021e-28	-4.99484e-12	0	SPONTPRORXN	0	0	0	7.92328	[0 +]	SPONTPRORXN	6.38381e-26	0	-1.62504e-27	8.40304e-12	0	SPONTPRORXN	0	2.90552e-32	-3.49036e-26	3.34617e-12	0	SPONTPRORXN	4.2082e-14	0	2.22746e-21	2.97488	[0 +]	SPONTPRORXN	2.28721e-14	-7.22789e-16	-5.09801e-29	8.0635e-12	0
StarchSynthesis	0	0	0	0	0	StarchSynthesis	0	0	0	0	0	StarchSynthesis	0	0	0	0	0	StarchSynthesis	0	0	0	0	0	StarchSynthesis	0	0	0	0	0	StarchSynthesis	0	0	0	0	0
StearicAcidKETOACYLCOATHIOLRXN	0	-3.39461e-33	0	0	0	StearicAcidKETOACYLCOATHIOLRXN	0	0	0	4.28524e-06	[0 +]	StearicAcidKETOACYLCOATHIOLRXN	0	-5.493e-31	0	4.83956e-14	0	StearicAcidKETOACYLCOATHIOLRXN	0	0	0	5.9654e-14	0	StearicAcidKETOACYLCOATHIOLRXN	0	0	0	6.69268e-06	[0 +]	StearicAcidKETOACYLCOATHIOLRXN	0	0	0	1.89309e-13	0
SUCCCOASYNRXNmitochondrion	0	1.38766e-16	0	0	0	SUCCCOASYNRXNmitochondrion	1.03247e-13	-3.34832e-15	0	5.35655e-05	[0 +]	SUCCCOASYNRXNmitochondrion	-2.51046e-13	0	0	0	0	SUCCCOASYNRXNmitochondrion	0	-3.92969e-15	0	0	0	SUCCCOASYNRXNmitochondrion	-1.09521e-13	0	0	3.52093e-05	[0 +]	SUCCCOASYNRXNmitochondrion	-1.07133e-13	-9.51752e-15	1.54258e-28	0	0
SUCCINATESEMIALDEHYDEDEHYDROGENASERXN	1.13233e-23	0	0	0	0	SUCCINATESEMIALDEHYDEDEHYDROGENASERXN	-2.13388e-13	0	0	5.35655e-05	[0 +]	SUCCINATESEMIALDEHYDEDEHYDROGENASERXN	0	0	0	0	0	SUCCINATESEMIALDEHYDEDEHYDROGENASERXN	0	1.15463e-29	0	0	0	SUCCINATESEMIALDEHYDEDEHYDROGENASERXN	0	0	0	3.52093e-05	[0 +]	SUCCINATESEMIALDEHYDEDEHYDROGENASERXN	0	4.75876e-15	0	5.85869e-13	0
SUCROSEPHOSPHATASERXN	4.16667	4.16667	4.16667	4.16667	+	SUCROSEPHOSPHATASERXN	0	0	1.61218e-23	15.8466	[0 +]	SUCROSEPHOSPHATASERXN	0	0	0	0	0	SUCROSEPHOSPHATASERXN	4.16667	4.16667	4.16667	4.16667	+	SUCROSEPHOSPHATASERXN	0	0	0	5.94975	[0 +]	SUCROSEPHOSPHATASERXN	0	0	0	8.35008e-12	0
SUCROSEPHOSPHATESYNTHASERXN	4.16667	4.16667	4.16667	4.16667	+	SUCROSEPHOSPHATESYNTHASERXN	0	0	1.61222e-23	15.8466	[0 +]	SUCROSEPHOSPHATESYNTHASERXN	0	0	0	0	0	SUCROSEPHOSPHATESYNTHASERXN	4.16667	4.16667	4.16667	4.16667	+	SUCROSEPHOSPHATESYNTHASERXN	0	0	0	5.94975	[0 +]	SUCROSEPHOSPHATESYNTHASERXN	0	0	0	8.35008e-12	0
SUCROSESYNTHASERXN	0	0	5.67599e-12	9.8687e-13	0	SUCROSESYNTHASERXN	0	1.10465e-14	-15.8466	7.92328	[- +]	SUCROSESYNTHASERXN	2.43894e-26	0	2.59118e-11	-5.78876e-12	0	SUCROSESYNTHASERXN	0	0	-1.50236e-11	1.07449e-11	0	SUCROSESYNTHASERXN	0	0	-5.94975	2.97488	[- +]	SUCROSESYNTHASERXN	0	0	-8.35008e-12	-2.50475e-12	0
SULFATEADENYLYLTRANSRXNChloroplast	0	0	0	0	0	SULFATEADENYLYLTRANSRXNChloroplast	0	0	0	2.81924e-06	[0 +]	SULFATEADENYLYLTRANSRXNChloroplast	0	0	0	1.45492e-13	0	SULFATEADENYLYLTRANSRXNChloroplast	0	0	0	0	0	SULFATEADENYLYLTRANSRXNChloroplast	0	0	0	6.63782e-06	[0 +]	SULFATEADENYLYLTRANSRXNChloroplast	0	0	0	0	0
SULFITEOXIDASERXN	0	0	0	0	0	SULFITEOXIDASERXN	0	0	0	0	0	SULFITEOXIDASERXN	0	0	0	0	0	SULFITEOXIDASERXN	0	0	0	0	0	SULFITEOXIDASERXN	0	0	0	0	0	SULFITEOXIDASERXN	0	0	0	0	0
SULFITEREDUCTASEFERREDOXINRXNChloroplast	0	0	0	0	0	SULFITEREDUCTASEFERREDOXINRXNChloroplast	0	0	0	2.81924e-06	[0 +]	SULFITEREDUCTASEFERREDOXINRXNChloroplast	0	0	0	1.45492e-13	0	SULFITEREDUCTASEFERREDOXINRXNChloroplast	0	0	0	0	0	SULFITEREDUCTASEFERREDOXINRXNChloroplast	0	0	0	6.63782e-06	[0 +]	SULFITEREDUCTASEFERREDOXINRXNChloroplast	0	0	0	0	0
SUPEROXDISMUTRXNchloroplast	0	0	0	0	0	SUPEROXDISMUTRXNchloroplast	0	0	0	2.71496e-05	[0 +]	SUPEROXDISMUTRXNchloroplast	2.68179e-28	0	0	4.80405e-13	0	SUPEROXDISMUTRXNchloroplast	0	0	0	1.99615e-12	0	SUPEROXDISMUTRXNchloroplast	0	0	0	8.20907e-05	[0 +]	SUPEROXDISMUTRXNchloroplast	0	0	0	0	0
TAGoverflow	0	0	0	0	0	TAGoverflow	0	0	0	3.19985e-07	0	TAGoverflow	0	0	0	2.50844e-14	0	TAGoverflow	0	0	0	1.45607e-14	0	TAGoverflow	0	0	0	6.07148e-07	0	TAGoverflow	0	0	0	1.76205e-14	0
TAGsink	0	0	0	0	0	TAGsink	0.602521	0.602521	0.602521	0.602521	+	TAGsink	0.602521	0.602521	0.602521	0.602521	+	TAGsink	0	0	0	0	0	TAGsink	0.610778	0.610778	0.610777	0.610778	+	TAGsink	0.610778	0.610778	0.610778	0.610778	+
THIOESTERRXNBUTYRYLCOAWATERBUTYRICACIDCOAPROTON44	0	0	0	0	0	THIOESTERRXNBUTYRYLCOAWATERBUTYRICACIDCOAPROTON44	0	0	0	7.92328	[0 +]	THIOESTERRXNBUTYRYLCOAWATERBUTYRICACIDCOAPROTON44	0	0	0	0	0	THIOESTERRXNBUTYRYLCOAWATERBUTYRICACIDCOAPROTON44	0	0	0	8.15315e-12	0	THIOESTERRXNBUTYRYLCOAWATERBUTYRICACIDCOAPROTON44	0	0	0	2.97488	[0 +]	THIOESTERRXNBUTYRYLCOAWATERBUTYRICACIDCOAPROTON44	0	0	0	4.26913e-12	0
THIOREDOXINREDUCTNADPHRXN	0	0	0	0	0	THIOREDOXINREDUCTNADPHRXN	0	0	0	0	0	THIOREDOXINREDUCTNADPHRXN	0	0	0	0	0	THIOREDOXINREDUCTNADPHRXN	0	0	0	0	0	THIOREDOXINREDUCTNADPHRXN	0	0	0	0	0	THIOREDOXINREDUCTNADPHRXN	0	0	0	0	0
ThrDehydRXNChloroplast	0	0	0	0	0	ThrDehydRXNChloroplast	0	1.55629e-15	0	2.81924e-06	[0 +]	ThrDehydRXNChloroplast	0	0	0	0	0	ThrDehydRXNChloroplast	0	0	0	1.64171e-13	0	ThrDehydRXNChloroplast	0	0	0	6.18178e-06	[0 +]	ThrDehydRXNChloroplast	0	0	0	0	0
ThrSynChloroplast	0	0	0	0	0	ThrSynChloroplast	0	2.72351e-15	0	4.46379e-06	[0 +]	ThrSynChloroplast	0	0	0	0	0	ThrSynChloroplast	0	0	0	0	0	ThrSynChloroplast	0	0	0	1.03822e-05	[0 +]	ThrSynChloroplast	0	0	0	0	0
THYMIDYLATESYNRXN	0	0	0	0	0	THYMIDYLATESYNRXN	0	0	0	0	0	THYMIDYLATESYNRXN	0	0	0	0	0	THYMIDYLATESYNRXN	0	0	0	0	0	THYMIDYLATESYNRXN	0	0	0	0	0	THYMIDYLATESYNRXN	0	0	0	0	0
TotalBiomassSink	0	0	0	0	0	TotalBiomassSink	0	2.13638e-11	0	0.00064837	[0 +]	TotalBiomassSink	0	0	0	0	0	TotalBiomassSink	0	0	0	0	0	TotalBiomassSink	0	0	0	0.00118363	[0 +]	TotalBiomassSink	0	0	0	1.66287e-13	0
TRANSALDOLRXNchloroplast	16.6667	0	-16.6667	16.6667	[- +]	TRANSALDOLRXNchloroplast	16.6296	0	-16.6296	32.4761	[- +]	TRANSALDOLRXNchloroplast	16.6296	0	-16.6296	16.6296	[- +]	TRANSALDOLRXNchloroplast	26.6667	-1.47589e-29	-26.6667	26.6667	[- +]	TRANSALDOLRXNchloroplast	26.9719	0	-26.972	32.9217	[- +]	TRANSALDOLRXNchloroplast	26.9719	0	-26.9719	26.9719	[- +]
TRANSCINNAMATE4MONOOXYGENASERXN	0	0	0	0	0	TRANSCINNAMATE4MONOOXYGENASERXN	0	0	4.32337e-26	1.36435e-07	0	TRANSCINNAMATE4MONOOXYGENASERXN	0	0	0	1.03839e-14	0	TRANSCINNAMATE4MONOOXYGENASERXN	0	0	0	0	0	TRANSCINNAMATE4MONOOXYGENASERXN	0	0	0	2.49573e-07	0	TRANSCINNAMATE4MONOOXYGENASERXN	0	0	0	1.29685e-13	0
TRIOSEPISOMERIZATIONRXN	958.333	0	-990.374	958.333	[- +]	TRIOSEPISOMERIZATIONRXN	-83.7505	-0.602521	-1000	966.138	[-1000 +]	TRIOSEPISOMERIZATIONRXN	966.138	0	-996.566	966.138	[- +]	TRIOSEPISOMERIZATIONRXN	938.333	-4.79119e-29	-987.27	938.333	[- +]	TRIOSEPISOMERIZATIONRXN	945.445	0	-1000	945.445	[-1000 +]	TRIOSEPISOMERIZATIONRXN	945.445	1.59706e-29	-996.519	945.445	[- +]
TRIOSEPISOMERIZATIONRXNchloroplast	-1000	-41.6667	-1000	948.707	[-1000 +]	TRIOSEPISOMERIZATIONRXNchloroplast	49.8888	-33.2592	-1000	966.138	[-1000 +]	TRIOSEPISOMERIZATIONRXNchloroplast	-1000	-33.8617	-1000	962.704	[-1000 +]	TRIOSEPISOMERIZATIONRXNchloroplast	-1000	-61.6667	-1000	925.603	[-1000 +]	TRIOSEPISOMERIZATIONRXNchloroplast	-1000	-54.5547	-1000	945.445	[-1000 +]	TRIOSEPISOMERIZATIONRXNchloroplast	-1000	-54.5547	-1000	941.964	[-1000 +]
txARG	-2.37255e-26	-1.21734e-16	0	0	0	txARG	2.26007e-14	1.14365e-14	-1.98391e-06	0	[- 0]	txARG	0	0	0	0	0	txARG	0	-1.28126e-15	0	0	0	txARG	4.2082e-14	0	-4.73575e-06	0	[- 0]	txARG	2.28721e-14	-7.22789e-16	0	0	0
txASN	0	0	0	0	0	txASN	0	0	-3.82611e-06	0	[- 0]	txASN	0	0	0	0	0	txASN	0	0	0	0	0	txASN	0	0	-9.20243e-06	0	[- 0]	txASN	0	0	0	0	0
txGLU	0	0	0	0	0	txGLU	0	0	-4.12042e-06	0	[- 0]	txGLU	0	0	0	0	0	txGLU	0	0	-1.73415e-13	0	0	txGLU	0	0	-8.01796e-06	0	[- 0]	txGLU	0	0	0	0	0
txGLUTATHIONE	5.752e-14	-4.94903e-32	0	0	0	txGLUTATHIONE	0	0	-1.57546e-06	0	[- 0]	txGLUTATHIONE	4.44505e-14	0	0	0	0	txGLUTATHIONE	0	0	-9.89036e-15	0	0	txGLUTATHIONE	0	0	-3.55181e-06	0	[- 0]	txGLUTATHIONE	0	0	0	0	0
txGLY	0	0	0	0	0	txGLY	0	0	-6.69569e-06	0	[- 0]	txGLY	0	0	0	0	0	txGLY	1.70176e-13	0	0	0	0	txGLY	0	0	-1.84049e-05	0	[- 0]	txGLY	0	0	0	0	0
txHIS	0	0	0	0	0	txHIS	0	0	-2.4348e-06	0	[- 0]	txHIS	0	0	0	0	0	txHIS	0	0	0	0	0	txHIS	0	0	-5.43499e-06	0	[- 0]	txHIS	0	0	0	0	0
txILE	0	0	0	0	0	txILE	0	0	-2.81924e-06	0	[- 0]	txILE	0	0	0	0	0	txILE	0	0	-1.64171e-13	0	0	txILE	0	0	-6.18178e-06	0	[- 0]	txILE	0	0	0	0	0
txLALPHAALANINE	0	0	0	0	0	txLALPHAALANINE	0	0	-5.35655e-06	0	[- 0]	txLALPHAALANINE	0	0	0	0	0	txLALPHAALANINE	0	0	-1.79282e-14	0	0	txLALPHAALANINE	0	0	-1.1909e-05	0	[- 0]	txLALPHAALANINE	0	0	0	0	0
txLASPARTATE	0	0	0	0	0	txLASPARTATE	0	0	-5.35655e-06	0	[- 0]	txLASPARTATE	0	0	0	0	0	txLASPARTATE	0	0	0	0	0	txLASPARTATE	0	0	-1.1909e-05	0	[- 0]	txLASPARTATE	0	0	0	0	0
txLEU	0	0	0	0	0	txLEU	0	0	-2.81924e-06	0	[- 0]	txLEU	0	0	-2.03239e-13	0	0	txLEU	0	0	-1.66001e-13	0	0	txLEU	0	0	-5.43499e-06	0	[- 0]	txLEU	0	0	-9.5412e-14	0	0
txLight	466.487	466.487	466.487	466.487	+	txLight	466.487	466.487	466.487	466.487	[+ +]	txLight	466.487	466.487	466.487	466.487	+	txLight	753.556	753.556	753.556	753.556	+	txLight	753.556	753.556	753.555	753.556	[+ +]	txLight	753.556	753.556	753.556	753.556	+
txLYS	0	0	0	0	0	txLYS	0	0	-2.4348e-06	0	[- 0]	txLYS	0	0	0	0	0	txLYS	0	0	0	0	0	txLYS	0	0	-5.54667e-06	0	[- 0]	txLYS	0	0	0	0	0
txMET	-5.752e-14	3.65379e-32	0	0	0	txMET	-3.5027e-32	1.16719e-15	-2.81924e-06	0	[- 0]	txMET	-4.44505e-14	0	0	0	0	txMET	0	0	0	0	0	txMET	0	0	-6.63782e-06	0	[- 0]	txMET	0	0	0	0	0
txMG2	0	0	0	1.62599e-15	0	txMG2	0	0	0	1.90068e-28	0	txMG2	0	0	0	-3.13053e-14	0	txMG2	0	0	0	-1.01338e-14	0	txMG2	0	0	0	6.89166e-21	0	txMG2	0	0	0	2.26297e-14	0
txNITRATE	0	0	0	2.2823e-13	0	txNITRATE	0	0	0	7.93563e-06	[0 +]	txNITRATE	0	0	0	6.92975e-14	0	txNITRATE	0	0	0	3.60326e-14	0	txNITRATE	0	-3.19055e-16	9.84579e-14	1.8943e-05	[0 +]	txNITRATE	0	0	0	-4.69162e-13	0
txPHE	0	0	0	0	0	txPHE	0	0	-2.2319e-06	0	[- 0]	txPHE	0	0	-6.14475e-14	0	0	txPHE	0	0	-3.43342e-14	0	0	txPHE	0	0	-4.49897e-06	0	[- 0]	txPHE	0	0	-3.40318e-14	0	0
txPi	6.30978e-13	8.55947e-15	-1.63241e-14	1.05849e-13	0	txPi	6.80281e-13	-5.80606e-15	7.05001e-13	8.63961e-07	0	txPi	2.50466e-13	-1.78007e-14	5.52447e-13	2.50466e-13	0	txPi	-1.87095e-13	5.99671e-15	2.78349e-13	5.75417e-13	0	txPi	-5.3199e-14	1.20639e-13	8.48024e-14	1.63764e-06	[0 +]	txPi	7.93143e-13	6.08625e-14	9.05942e-14	7.93143e-13	0
txPROTON	-6.90484e-15	4.6209e-14	-1.57342e-16	-2.58309e-12	0	txPROTON	-8.04848e-14	2.64991e-13	1.02833e-14	7.92328	[0 +]	txPROTON	-1.95399e-13	-8.93354e-14	-3.96128e-13	6.21725e-14	0	txPROTON	-1.30022e-13	2.07553e-13	5.20936e-13	6.68753e-12	0	txPROTON	3.30806e-13	-4.26461e-13	-1.40081e-12	2.97488	[0 +]	txPROTON	-2.85105e-13	9.17814e-14	-1.77636e-14	4.03055e-12	0
txSER	0	0	0	0	0	txSER	0	0	-5.95172e-06	0	[- 0]	txSER	0	0	0	0	0	txSER	0	0	-8.71371e-14	0	0	txSER	0	0	-1.28542e-05	0	[- 0]	txSER	0	0	0	0	0
txSUCROSE	-4.16667	-4.16667	-4.16667	-4.16667	-	txSUCROSE	0	0	-2.2319e-06	0	[- 0]	txSUCROSE	0	0	-1.32598e-14	0	0	txSUCROSE	-4.16667	-4.16667	-4.16667	-4.16667	-	txSUCROSE	0	0	-4.21778e-06	0	[- 0]	txSUCROSE	0	0	-7.43431e-14	0	0
txSULFATE	0	0	0	1.40945e-13	0	txSULFATE	0	0	0	2.81924e-06	[0 +]	txSULFATE	0	0	0	1.45492e-13	0	txSULFATE	0	0	0	-1.07867e-13	0	txSULFATE	0	0	0	6.63782e-06	[0 +]	txSULFATE	0	0	0	-1.73969e-13	0
txTHR	0	0	0	0	0	txTHR	0	0	-4.46379e-06	0	[- 0]	txTHR	0	0	0	0	0	txTHR	0	0	0	0	0	txTHR	0	0	-1.03822e-05	0	[- 0]	txTHR	0	0	0	0	0
txTYR	0	0	0	0	0	txTYR	0	0	-2.32894e-06	0	[- 0]	txTYR	0	0	-5.91599e-14	0	0	txTYR	0	0	0	0	0	txTYR	0	0	-4.62751e-06	0	[- 0]	txTYR	0	0	-1.10139e-13	0	0
txVAL	0	0	0	0	0	txVAL	0	0	-3.34785e-06	0	[- 0]	txVAL	0	0	-1.04879e-14	0	0	txVAL	0	0	0	0	0	txVAL	0	0	-6.98115e-06	0	[- 0]	txVAL	0	0	0	0	0
txWATER	45.8333	45.8333	45.8333	45.8333	+	txWATER	28.5595	28.5595	28.5595	28.5595	[+ +]	txWATER	28.5595	28.5595	28.5595	28.5595	+	txWATER	45.8333	45.8333	45.8333	45.8333	+	txWATER	28.9509	28.9509	28.9508	28.9509	[+ +]	txWATER	28.9509	28.9509	28.9509	28.9509	+
TYRAMINENFERULOYLTRANSFERASERXN	0	0	0	0	0	TYRAMINENFERULOYLTRANSFERASERXN	0	0	0	0	0	TYRAMINENFERULOYLTRANSFERASERXN	0	0	0	0	0	TYRAMINENFERULOYLTRANSFERASERXN	0	0	0	0	0	TYRAMINENFERULOYLTRANSFERASERXN	0	0	0	0	0	TYRAMINENFERULOYLTRANSFERASERXN	0	0	0	0	0
TyrosineAmmoniaLyaseRxn	0	0	0	0	0	TyrosineAmmoniaLyaseRxn	0	4.51856e-15	0	1.37134e-07	0	TyrosineAmmoniaLyaseRxn	0	0	0	8.81668e-14	0	TyrosineAmmoniaLyaseRxn	0	0	0	0	0	TyrosineAmmoniaLyaseRxn	0	0	0	2.50345e-07	0	TyrosineAmmoniaLyaseRxn	0	0	0	1.02943e-13	0
TYROSINEDECARBOXYLASERXN	0	0	0	0	0	TYROSINEDECARBOXYLASERXN	0	0	0	0	0	TYROSINEDECARBOXYLASERXN	0	0	0	0	0	TYROSINEDECARBOXYLASERXN	0	0	0	0	0	TYROSINEDECARBOXYLASERXN	0	0	0	0	0	TYROSINEDECARBOXYLASERXN	0	0	0	0	0
UDPARABINOSE4EPIMERASERXN	0	0	0	0	0	UDPARABINOSE4EPIMERASERXN	0	1.27384e-14	0	3.86598e-07	0	UDPARABINOSE4EPIMERASERXN	0	0	0	0	0	UDPARABINOSE4EPIMERASERXN	0	0	0	0	0	UDPARABINOSE4EPIMERASERXN	0	0	0	7.05755e-07	0	UDPARABINOSE4EPIMERASERXN	0	0	0	9.91505e-17	0
UDPGLUCEPIMRXNmod	0	1.21018e-29	0	4.36057e-12	0	UDPGLUCEPIMRXNmod	0	-4.37886e-15	2.25919e-23	7.92328	[0 +]	UDPGLUCEPIMRXNmod	8.64969e-31	0	8.64969e-31	4.0928e-12	0	UDPGLUCEPIMRXNmod	2.05663e-16	-1.54903e-28	2.52815e-16	8.53657e-12	0	UDPGLUCEPIMRXNmod	0	0	0	2.97488	[0 +]	UDPGLUCEPIMRXNmod	0	0	0	5.46047e-12	0
UDPGLUCURONATE4EPIMERASERXN	0	0	0	0	0	UDPGLUCURONATE4EPIMERASERXN	0	3.98078e-16	0	1.20813e-08	0	UDPGLUCURONATE4EPIMERASERXN	0	0	0	0	0	UDPGLUCURONATE4EPIMERASERXN	0	0	0	0	0	UDPGLUCURONATE4EPIMERASERXN	0	0	0	2.2055e-08	0	UDPGLUCURONATE4EPIMERASERXN	0	0	0	3.09848e-18	0
UDPGLUCURONATEDECARBOXYLASERXN	0	0	0	0	0	UDPGLUCURONATEDECARBOXYLASERXN	0	2.9856e-14	0	9.06099e-07	0	UDPGLUCURONATEDECARBOXYLASERXN	0	0	0	0	0	UDPGLUCURONATEDECARBOXYLASERXN	0	0	0	0	0	UDPGLUCURONATEDECARBOXYLASERXN	0	0	0	1.65413e-06	[0 +]	UDPGLUCURONATEDECARBOXYLASERXN	0	0	0	2.32387e-16	0
UDPKINRXN	4.16667	4.16667	4.16667	4.16667	+	UDPKINRXN	0	7.37447e-14	1.61224e-23	15.8466	[0 +]	UDPKINRXN	1.5416e-25	0	0	0	0	UDPKINRXN	4.16667	4.16667	4.16667	4.16667	+	UDPKINRXN	0	0	0	5.94975	[0 +]	UDPKINRXN	0	0	0	4.4831e-12	0
UDPREDUCTRXN	0	0	0	0	0	UDPREDUCTRXN	0	0	0	0	0	UDPREDUCTRXN	0	0	0	0	0	UDPREDUCTRXN	0	0	0	0	0	UDPREDUCTRXN	0	0	0	0	0	UDPREDUCTRXN	0	0	0	0	0
UGDRXN	0	0	0	0	0	UGDRXN	0	3.06522e-14	0	9.30262e-07	0	UGDRXN	0	0	0	0	0	UGDRXN	0	0	0	0	0	UGDRXN	0	0	0	1.69824e-06	[0 +]	UGDRXN	0	0	0	2.38584e-16	0
UREASERXN	-8.86579e-26	0	0	0	0	UREASERXN	0	0	0	2.64109	[0 +]	UREASERXN	6.37905e-26	0	0	0	0	UREASERXN	0	4.06098e-32	0	3.24216e-12	0	UREASERXN	4.2082e-14	0	0	0.991625	[0 +]	UREASERXN	2.28721e-14	-7.22789e-16	0	1.17994e-12	0
UROGENDECARBOXRXN	0	0	0	0	0	UROGENDECARBOXRXN	0	0	0	0	0	UROGENDECARBOXRXN	0	0	0	0	0	UROGENDECARBOXRXN	0	0	0	0	0	UROGENDECARBOXRXN	0	0	0	0	0	UROGENDECARBOXRXN	0	0	0	0	0
UROGENIIISYNRXN	0	0	0	0	0	UROGENIIISYNRXN	0	0	0	0	0	UROGENIIISYNRXN	0	0	0	0	0	UROGENIIISYNRXN	0	0	0	0	0	UROGENIIISYNRXN	0	0	0	0	0	UROGENIIISYNRXN	0	0	0	0	0
UTPHEXPURIDYLYLTRANSRXN	0	1.21096e-29	0	0	0	UTPHEXPURIDYLYLTRANSRXN	0	7.37447e-14	0	7.92328	[0 +]	UTPHEXPURIDYLYLTRANSRXN	0	0	0	0	0	UTPHEXPURIDYLYLTRANSRXN	0	-1.52234e-28	0	1.07182e-11	0	UTPHEXPURIDYLYLTRANSRXN	0	0	0	2.97488	[0 +]	UTPHEXPURIDYLYLTRANSRXN	0	0	0	5.46739e-12	0
XylanSynthasemod	0	0	0	0	0	XylanSynthasemod	0	0	0	0	0	XylanSynthasemod	0	0	0	0	0	XylanSynthasemod	0	0	0	0	0	XylanSynthasemod	0	0	0	0	0	XylanSynthasemod	0	0	0	0	0
XylogalacturonanSynthesismod	0	0	0	0	0	XylogalacturonanSynthesismod	0	0	0	0	0	XylogalacturonanSynthesismod	0	0	0	0	0	XylogalacturonanSynthesismod	0	0	0	0	0	XylogalacturonanSynthesismod	0	0	0	0	0	XylogalacturonanSynthesismod	0	0	0	0	0
XyloglucanSynthesismod	0	0	0	0	0	XyloglucanSynthesismod	0	0	0	0	0	XyloglucanSynthesismod	0	0	0	0	0	XyloglucanSynthesismod	0	0	0	0	0	XyloglucanSynthesismod	0	0	0	0	0	XyloglucanSynthesismod	0	0	0	0	0
XyloseTransfermod	0	0	0	0	0	XyloseTransfermod	0	1.71176e-14	0	5.19502e-07	0	XyloseTransfermod	0	0	0	0	0	XyloseTransfermod	0	0	0	0	0	XyloseTransfermod	0	0	0	9.48378e-07	0	XyloseTransfermod	0	0	0	1.33236e-16	0
txCARBONDIOXIDE	50	50	50	50	+	txCARBONDIOXIDE	33.8617	33.8617	33.8617	33.8617	[+ +]	txCARBONDIOXIDE	33.8617	33.8617	33.8617	33.8617	+	txCARBONDIOXIDE	50	50	50	50	+	txCARBONDIOXIDE	34.3257	34.3257	34.3257	34.3257	[+ +]	txCARBONDIOXIDE	34.3257	34.3257	34.3257	34.3257	+
txOXYGENMOLECULE	-50	-50	-50	-50	-	txOXYGENMOLECULE	-46.3339	-46.3339	-46.3339	-46.3339	[- -]	txOXYGENMOLECULE	-46.3339	-46.3339	-46.3339	-46.3339	-	txOXYGENMOLECULE	-50	-50	-50	-50	-	txOXYGENMOLECULE	-46.9688	-46.9688	-46.9688	-46.9688	[- -]	txOXYGENMOLECULE	-46.9688	-46.9688	-46.9688	-46.9688	-
ATPsurplus	0	0	0	0	0	ATPsurplus	0	-6.41206e-10	0	15.8466	[0 +]	ATPsurplus	15.8463	15.8463	15.8463	15.8463	+	ATPsurplus	0	0	0	1.83405e-11	0	ATPsurplus	0	0	0	5.94975	[0 +]	ATPsurplus	5.94897	5.94897	5.94897	5.94897	+
NADPHsurplus	0	0	0	0	0#	NADPHsurplus	0	0	0	0	0#	NADPHsurplus	0	0	0	0	0#	NADPHsurplus	0	0	0	0	0#	NADPHsurplus	0	0	0	0	0#	NADPHsurplus	0	0	0	0	0#
